# Supplementary material for: RuPHOX–Ru catalyzed asymmetric hydrogenation of α-substituted tetralones via a dynamic kinetic resolution
Source: Royal Society of Chemistry journal article supplement (doi:10.1039/d2cc01193j), 2022-01-01
Supplement: d2cc01193j1.pdf [file d2cc01193j1.pdf]

## Supporting Information

### **RuPHOX-Ru Catalyzed Asymmetric Hydrogenation of $\alpha$ -Substituted Tetralones via a Dynamic Kinetic Resolution**

Jingjing Li,<sup>[a]</sup> Jianxun Ye,<sup>[a]</sup> Jiayu Zhou,<sup>[a]</sup> Jing Li,<sup>[a]</sup> Delong Liu,<sup>\*[a]</sup> and Wanbin Zhang<sup>[a,b]</sup>

<sup>[a]</sup>Shanghai Key Laboratory for Molecular Engineering of Chiral Drugs, School of Pharmacy, Shanghai Jiao Tong University, 800 Dongchuan Road, Shanghai 200240, P. R. China.

<sup>[b]</sup>Green Catalysis Center, and College of Chemistry, Zhengzhou University, 100 Kexue Road, Zhengzhou 450001, P. R. China.

E-mail: dliu@sjtu.edu.cn

### Contents

|                                                                       |      |
|-----------------------------------------------------------------------|------|
| 1. General Detail .....                                               | S2   |
| 2. Preparation of Substrates.....                                     | S2   |
| 3. Asymmetric Hydrogenation of $\alpha$ -Substituted Tetralones ..... | S16  |
| 4. Scale-up Synthesis and Transformations.....                        | S35  |
| 5. Deuterium-Labeling Experiments .....                               | S39  |
| 6. X-Ray Analysis .....                                               | S43  |
| 7. NMR Spectra.....                                                   | S44  |
| 8. HPLC Data.....                                                     | S160 |
| 9. References.....                                                    | S212 |

## 1. General Detail

Hydrogenation reactions were performed in an autoclave under an atmosphere of hydrogen. All air- and moisture-sensitive reactions were performed in dried glassware under an atmosphere of nitrogen. Solvents used in the glove box were dried and degassed by standard procedures. Melting points were measured with SGW X-4 micro melting point apparatus and the thermometer was uncorrected. All commercially available reagents were used without further purification. Column chromatography was performed using silica gel (100-200 mesh).  $^1\text{H}$  NMR,  $^{13}\text{C}$  NMR and  $^{19}\text{F}$  NMR spectra were recorded on a Bruker Ascend TM 400 (400 MHz, 100 MHz and 376 MHz, respectively). High resolution mass spectra (HRMS) were performed on a Fourier-transform mass spectrometry at the Instrumental Analysis Center of Shanghai Jiao Tong University. Enantioselectivity was measured by a high performance liquid chromatography (HPLC) using Daicel Chiral column IA, IB-3, IE, OJ-H, OD-H, AD-H or OX columns with *n*-hexane/*i*-PrOH as eluent. X-ray single crystal diffraction data were collected on a Bruker D8 VENTURE CMOS photon 100 diffractometer with helios mx multilayer monochromator Cu K $\alpha$  radiation ( $\lambda = 1.54178 \text{ \AA}$ ) at the Instrumental Analysis Center of Shanghai Jiao Tong University.

## 2. Preparation of Substrates

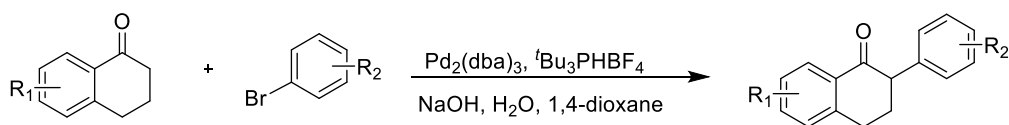

**The substrates 1 were prepared by following literature procedures:**<sup>[1]</sup> Under a  $\text{N}_2$  atmosphere, to a 100 mL of three-necked flask equipped with a magnetic stir bar were added  $\text{Pd}_2(\text{dba})_3$  (1.5 mol%),  $t\text{Bu}_3\text{PHBF}_4$  (6 mol%) and NaOH (2.0 equiv). Then  $\alpha$ -tetralone (1.0 equiv), ArBr (1.2 equiv), 1,4-dioxane (6 mL) and  $\text{H}_2\text{O}$  (1.5 mL) were added respectively. The mixture was stirred for 1~2 h at 100  $^\circ\text{C}$  (oil bath) before the reaction was cooled to room temperature, diluted with EtOAc, washed with saturated aqueous  $\text{NH}_4\text{Cl}$  and dried over anhydrous  $\text{Na}_2\text{SO}_4$ . The filtrate was concentrated in vacuo and the residue was purified by a silica gel column chromatography (PE/EtOAc = 20/1) to afford the tertiary aryl ketones **1**.

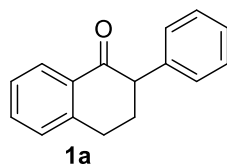

**2-Phenyl-3,4-dihydronaphthalen-1(2H)-one (1a):**<sup>[2]</sup> White solid (14.0 g, 80%).  $^1\text{H}$  NMR (400 MHz,  $\text{CDCl}_3$ )  $\delta$  8.10 (dd,  $J = 7.6, 0.8 \text{ Hz}$ , 1H), 7.51 (dt,  $J = 13.6, 1.2 \text{ Hz}$ , 1H), 7.36–7.33 (m, 3H), 7.29–7.25 (m, 2H), 7.20–7.18 (m, 2H), 3.83–3.79 (m, 1H), 3.17–3.01 (m, 2H), 2.47–2.41 (m, 2H).

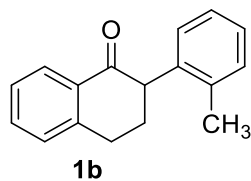

**2-(2-Tolyl)-3,4-dihydronaphthalen-1(2H)-one (1b):**<sup>[2]</sup> White solid (3.3 g, 70%). <sup>1</sup>H NMR (400 MHz, CDCl<sub>3</sub>)  $\delta$  8.09 (d,  $J$  = 8.0 Hz, 1H), 7.49 (t,  $J$  = 7.2 Hz, 1H), 7.33 (t,  $J$  = 8.0 Hz, 1H), 7.28–7.20 (m, 2H), 7.08 (d,  $J$  = 8.0 Hz, 1H), 7.00–6.97 (m, 2H), 3.77–3.73 (m, 1H), 3.15–3.00 (m, 2H), 2.49–2.37 (m, 2H), 2.33 (s, 3H).

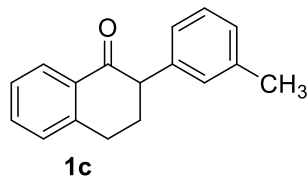

**2-(3-Tolyl)-3,4-dihydronaphthalen-1(2H)-one (1c):**<sup>[3]</sup> White solid (3.6 g, 77%). <sup>1</sup>H NMR (400 MHz, CDCl<sub>3</sub>)  $\delta$  8.10 (d,  $J$  = 8.0 Hz, 1H), 7.51 (t,  $J$  = 8.0 Hz, 1H), 7.37–7.30 (m, 2H), 7.23–7.14 (t,  $J$  = 8.0 Hz, 3H), 7.07–7.05 (m, 1H), 4.01–3.97 (m, 1H), 3.21–3.04 (m, 2H), 2.50–2.34 (m, 2H), 2.32 (s, 3H).

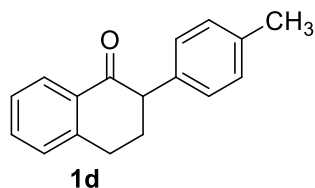

**2-(4-Tolyl)-3,4-dihydronaphthalen-1(2H)-one (1d):**<sup>[2]</sup> White solid (3.2 g, 68%). <sup>1</sup>H NMR (400 MHz, CDCl<sub>3</sub>)  $\delta$  8.09 (d,  $J$  = 8.0 Hz, 1H), 7.49 (t,  $J$  = 7.2 Hz, 1H), 7.33 (t,  $J$  = 8.0 Hz, 1H), 7.26 (t,  $J$  = 8.0 Hz, 1H), 7.11 (dd,  $J$  = 28.8, 8.0 Hz, 4H), 3.78–3.74 (m, 1H), 3.00–3.15 (m, 2H), 2.39–2.45 (m, 2H), 2.34 (s, 3H).

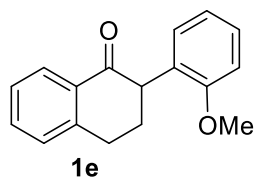

**2-(2-Methoxyphenyl)-3,4-dihydronaphthalen-1(2H)-one (1e):**<sup>[2]</sup> White solid (3.6 g, 77%). <sup>1</sup>H NMR (400 MHz, CDCl<sub>3</sub>)  $\delta$  8.10 (d,  $J$  = 8.0 Hz, 1H), 7.48 (t,  $J$  = 8.0 Hz, 1H), 7.33 (t,  $J$  = 8.0 Hz, 1H), 7.29–7.23 (m, 2H), 7.11 (d,  $J$  = 7.2 Hz, 1H), 6.95–6.90 (m, 2H), 4.05 (dd,  $J$  = 12.0, 4.4 Hz, 1H), 3.75 (s, 3H), 3.17–3.09 (m, 1H), 3.04–2.98 (m, 1H), 2.55–2.44 (m, 1H), 2.30–2.24 (m, 1H).

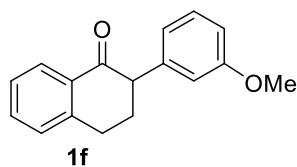

**2-(3-Methoxyphenyl)-3,4-dihydronaphthalen-1(2H)-one (1f):**<sup>[2]</sup> White solid (3.5 g, 74%). <sup>1</sup>H

NMR (400 MHz, CDCl<sub>3</sub>)  $\delta$  8.09 (d,  $J$  = 8.0 Hz, 1H), 7.50 (t,  $J$  = 7.6 Hz, 1H), 7.33 (t,  $J$  = 8.0 Hz, 1H), 7.28–7.24 (m, 2H), 6.83–6.74 (m, 3H), 3.78 (s, 3H), 3.15–3.01 (m, 2H), 2.46–2.40 (m, 2H).

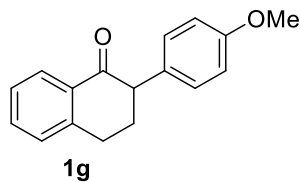

**2-(4-Methoxyphenyl)-3,4-dihydronaphthalen-1(2H)-one (1g):**<sup>[2]</sup> White solid (4.0 g, 85%). <sup>1</sup>H NMR (400 MHz, CDCl<sub>3</sub>)  $\delta$  8.09 (d,  $J$  = 8.0 Hz, 1H), 7.49 (t,  $J$  = 8.0 Hz, 1H), 7.33 (t,  $J$  = 8.0 Hz, 1H), 7.28–7.25 (m, 1H), 7.11 (dd,  $J$  = 8.0 Hz, 2H), 6.88 (d,  $J$  = 8.0 Hz, 2H), 3.80 (s, 3H), 3.77–3.73 (m, 1H), 3.15–3.01 (m, 2H), 2.43–2.38 (m, 2H).

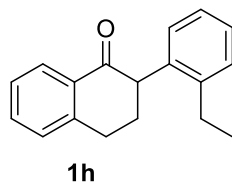

**2-(2-Ethylphenyl)-3,4-dihydronaphthalen-1(2H)-one (1h):** Yellow oil (3.0 g, 60%). <sup>1</sup>H NMR (400 MHz, CDCl<sub>3</sub>)  $\delta$  8.09 (dd,  $J$  = 8.0, 1.6 Hz, 1H), 7.48 (td,  $J$  = 7.6, 1.6 Hz, 1H), 7.33–7.13 (m, 5H), 7.05–7.03 (m, 1H), 4.00 (dd,  $J$  = 12.4, 4.8 Hz, 1H), 3.18–3.10 (m, 1H), 3.04 (dt,  $J$  = 16.8, 4.0 Hz, 1H), 2.64 (qd,  $J$  = 7.6, 1.6 Hz, 2H), 2.46–2.29 (m, 2H), 1.22 (t,  $J$  = 7.6 Hz, 3H). <sup>13</sup>C NMR (100 MHz, CDCl<sub>3</sub>)  $\delta$  198.5, 144.1, 142.4, 138.3, 133.5, 133.1, 128.9, 128.8, 128.1, 127.8, 127.1, 126.8, 126.2, 51.0, 31.4, 29.6, 26.3, 15.7. IR (KBr) ( $\nu$ /cm<sup>-1</sup>): 2963, 1684, 1599, 1454, 1371, 1221, 759. HRMS (ESI):  $m/z$  for C<sub>18</sub>H<sub>19</sub>O [M+H]<sup>+</sup> calcd 251.1436, found 251.1436.

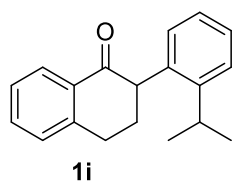

**2-(2-Isopropylphenyl)-3,4-dihydronaphthalen-1(2H)-one (1i):** Yellow oil (3.5 g, 67%). <sup>1</sup>H NMR (400 MHz, CDCl<sub>3</sub>)  $\delta$  8.08 (dd,  $J$  = 7.6, 1.2 Hz, 1H), 7.42 (td,  $J$  = 7.2, 1.2 Hz, 1H), 7.32–7.18 (m, 4H), 7.10 (td,  $J$  = 7.2, 1.2 Hz, 1H), 7.02–7.00 (m, 1H), 4.01 (dd,  $J$  = 12.0, 4.8 Hz, 1H), 3.08 (ddd,  $J$  = 16.4, 11.5, 4.8 Hz, 1H), 3.03–2.92 (m, 2H), 2.43–2.23 (m, 2H), 1.30–1.14 (m, 6H). <sup>13</sup>C NMR (100 MHz, CDCl<sub>3</sub>)  $\delta$  198.3, 147.0, 144.2, 137.8, 133.5, 133.2, 129.0, 128.6, 127.8, 127.4, 126.9, 126.0, 125.8, 51.6, 31.8, 29.74, 29.72, 24.4, 23.9. IR (KBr) ( $\nu$ /cm<sup>-1</sup>): 3061, 2962, 1685, 1598, 1454, 1220, 898, 758. HRMS (ESI):  $m/z$  for C<sub>19</sub>H<sub>21</sub>O [M+H]<sup>+</sup> calcd 265.1592, found 265.1592.

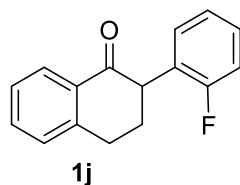

**2-(2-Fluorophenyl)-3,4-dihydronaphthalen-1(2H)-one (1j):** White solid (3.3 g, 69%). Mp: 86–87 °C. <sup>1</sup>H NMR (400 MHz, CDCl<sub>3</sub>) δ 8.10 (d, *J* = 8.0 Hz, 1H), 7.51 (t, *J* = 8.0 Hz, 1H), 7.36–7.24 (m, 3H), 7.18–7.06 (m, 3H), 4.02 (dd, *J* = 12.0, 4.0 Hz, 1H), 3.23–3.15 (m, 1H), 3.08–3.02 (m, 1H), 2.55–2.44 (m, 1H), 2.39–2.32 (m, 1H). <sup>13</sup>C NMR (100 MHz, CDCl<sub>3</sub>) δ 196.8, 161.0 (d, *J* = 244.3 Hz), 144.0, 133.6, 132.6, 129.9 (d, *J* = 4.7 Hz), 128.8, 128.7 (d, *J* = 8.3 Hz), 127.9, 127.4 (d, *J* = 14.9 Hz), 126.8, 124.2 (d, *J* = 3.4 Hz), 115.6 (d, *J* = 22.0 Hz), 49.4, 30.2 (d, *J* = 1.4 Hz), 29.5. <sup>19</sup>F NMR (376 MHz, CDCl<sub>3</sub>) δ –116.4 (d, *J* = 3.4 Hz). IR (KBr) (ν/cm<sup>-1</sup>): 3740, 3570, 2938, 1694, 1496, 1457, 1226, 894, 758. HRMS (ESI): *m/z* for C<sub>16</sub>H<sub>14</sub>FO [M+H]<sup>+</sup> calcd 241.1029, found 241.1022.

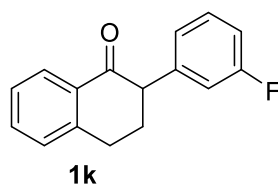

**2-(3-Fluorophenyl)-3,4-dihydronaphthalen-1(2H)-one (1k):**<sup>[4]</sup> White solid (3.4 g, 71%). <sup>1</sup>H NMR (400 MHz, CDCl<sub>3</sub>) δ 8.09 (d, *J* = 8.0 Hz, 1H), 7.51 (t, *J* = 8.0 Hz, 1H), 7.37–7.26 (m, 3H), 6.99–6.90 (m, 3H), 3.84–3.77 (m, 1H), 3.18–3.02 (m, 2H), 2.45–2.40 (m, 2H).

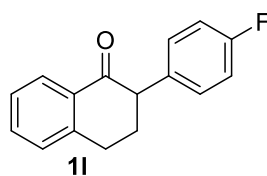

**2-(4-Fluorophenyl)-3,4-dihydronaphthalen-1(2H)-one (1l):**<sup>[2]</sup> White solid (3.2 g, 67%). <sup>1</sup>H NMR (400 MHz, CDCl<sub>3</sub>) δ 8.09 (d, *J* = 4.0 Hz, 1H), 7.51 (t, *J* = 8.0 Hz, 1H), 7.34 (t, *J* = 8.0 Hz, 1H), 7.30–7.25 (m, 1H), 7.17–7.14 (m, 2H), 7.05–7.01 (m, 2H), 3.82–3.74 (m, 1H), 3.18–3.02 (m, 2H), 2.43–2.38 (m, 2H).

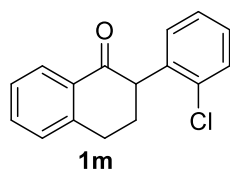

**2-(2-Chlorophenyl)-3,4-dihydronaphthalen-1(2H)-one (1m):**<sup>[5]</sup> White solid (2.4 g, 47%). <sup>1</sup>H NMR (400 MHz, CDCl<sub>3</sub>) δ 8.11 (dd, *J* = 7.6, 1.2 Hz, 1H), 7.51 (td, *J* = 7.6, 1.6 Hz, 1H), 7.45–7.38 (m, 1H), 7.38–7.26 (m, 2H), 7.26–7.12 (m, 3H), 4.28 (dd, *J* = 12.4, 4.6 Hz, 1H), 3.20 (ddd, *J* = 16.5, 11.8, 4.6 Hz, 1H), 3.05 (dt, *J* = 16.8, 4.0 Hz, 1H), 2.48 (qd, *J* = 12.5, 4.2 Hz, 1H), 2.39–2.32 (m,

1H). <sup>13</sup>C NMR (100 MHz, CDCl<sub>3</sub>) δ 196.9, 143.9, 138.0, 134.4, 133.5, 132.8, 129.7, 129.6, 128.8, 128.3, 127.8, 127.0, 126.8, 52.1, 30.1, 29.4.

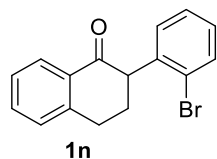

**2-(2-Bromophenyl)-3,4-dihydronaphthalen-1(2H)-one (1n):**<sup>[6]</sup> Pale yellow oil (1.2 g, 34%). <sup>1</sup>H NMR (400 MHz, CDCl<sub>3</sub>) δ 8.04 (dd, *J* = 7.6, 1.2 Hz, 1H), 7.53 (dd, *J* = 8.0, 1.2 Hz, 1H), 7.44 (td, *J* = 7.2, 1.2 Hz, 1H), 7.31–7.16 (m, 3H), 7.07 (ddd, *J* = 15.4, 7.8, 1.7 Hz, 2H), 4.24 (dd, *J* = 12.0, 4.8 Hz, 1H), 3.18–3.10 (m, 1H), 2.98 (dt, *J* = 16.8, 4.0 Hz, 1H), 2.47–2.25 (m, 2H). <sup>13</sup>C NMR (100 MHz, CDCl<sub>3</sub>) δ 197.0, 143.9, 139.7, 133.6, 133.0, 132.9, 129.6, 128.9, 128.6, 127.9, 127.7, 126.9, 125.3, 54.4, 30.5, 29.4.

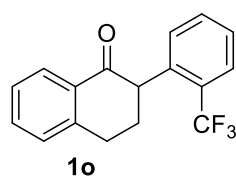

**2-(2-(Trifluoromethyl)phenyl)-3,4-dihydronaphthalen-1(2H)-one (1o):** Pale yellow oil (3.2 g, 55%). <sup>1</sup>H NMR (400 MHz, CDCl<sub>3</sub>) δ 8.12 (dd, *J* = 8.0, 1.6 Hz, 1H), 7.71 (d, *J* = 8.0 Hz, 1H), 7.55–7.48 (m, 2H), 7.42–7.25 (m, 4H), 4.26 (dd, *J* = 12.4, 4.8 Hz, 1H), 3.23 (ddd, *J* = 17.0, 10.8, 6.2 Hz, 1H), 3.06 (dt, *J* = 16.9, 3.6 Hz, 1H), 2.48–2.32 (m, 2H). <sup>13</sup>C NMR (100 MHz, CDCl<sub>3</sub>) δ 97.2, 144.0, 139.6 (d, *J* = 1.0 Hz), 133.6, 132.8, 132.0, 129.3, 128.9, 128.6 (d, *J* = 333.5 Hz), 127.7, 126.8, 126.0, 125.8 (q, *J* = 5.7 Hz), 123.3, 51.3 (d, *J* = 2.0 Hz), 32.3, 29.7. <sup>19</sup>F NMR (376 MHz, CDCl<sub>3</sub>) δ –58.6. IR (KBr) (ν/cm<sup>-1</sup>): 3069, 2935, 1687, 1599, 1454, 1313, 1108, 766. IR (KBr) (ν/cm<sup>-1</sup>): 3061, 2962, 1685, 1598, 1454, 1220, 898, 758, HRMS (ESI): *m/z* for C<sub>17</sub>H<sub>14</sub>OF<sub>3</sub> [M+H]<sup>+</sup> calcd 291.0997, found 291.0994.

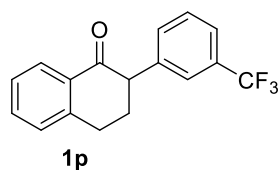

**2-(3-(Trifluoromethyl)phenyl)-3,4-dihydronaphthalen-1(2H)-one (1p):** White solid (2.4 g, 57%). Mp: 80–81 °C. <sup>1</sup>H NMR (400 MHz, CDCl<sub>3</sub>) δ 8.08 (dd, *J* = 8.0, 1.6 Hz, 1H), 7.60–7.42 (m, 4H), 7.39–7.23 (m, 3H), 3.84 (dd, *J* = 10.6, 6.0 Hz, 1H), 3.21–3.13 (m, 1H), 3.06 (dt, *J* = 16.8, 4.3 Hz, 1H), 2.52–2.38 (m, 2H). <sup>13</sup>C NMR (100 MHz, CDCl<sub>3</sub>) δ 197.3, 142.3 (d, *J* = 320.1 Hz), 133.7, 132.6, 132.1, 130.8 (d, *J* = 32.0 Hz), 128.9 (d, *J* = 6.4 Hz), 126.9, 125.5, 125.4 (q, *J* = 3.9 Hz), 123.9 (q, *J* = 4.0 Hz), 122.8, 54.4, 31.1, 29.1. <sup>19</sup>F NMR (376 MHz, CDCl<sub>3</sub>) δ –62.5 IR (KBr) (ν/cm<sup>-1</sup>): 3744, 3641, 3570, 2954, 1692, 1453, 1340, 11230, 1121. HRMS (ESI): *m/z* for C<sub>17</sub>H<sub>14</sub>F<sub>3</sub>O [M+H]<sup>+</sup> calcd

291.0997, found 291.1004.

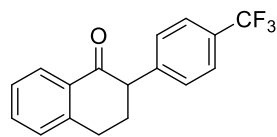

**1q**

**2-(4-(Trifluoromethyl)phenyl)-3,4-dihydronaphthalen-1(2H)-one (1q):** White solid (2.8 g, 62%). Mp: 151–152 °C. <sup>1</sup>H NMR (400 MHz, CDCl<sub>3</sub>) δ 8.10 (dd, *J* = 7.6, 1.2 Hz, 1H), 7.61 (d, *J* = 8.0 Hz, 2H), 7.53 (td, *J* = 7.2, 1.2 Hz, 1H), 7.38–7.26 (m, 4H), 3.86 (dd, *J* = 10.4, 6.4 Hz, 1H), 3.22–3.14 (m, 1H), 3.07 (dt, *J* = 16.8, 4.4 Hz, 1H), 2.54–2.36 (m, 2H). <sup>13</sup>C NMR (100 MHz, CDCl<sub>3</sub>) δ 197.3, 143.88, 143.82, 133.7, 132.6, 129.4, 128.9, 128.8, 127.9, 127.0, 125.5 (q, *J* = 3.8 Hz), 122.9, 54.4, 31.1, 29.0. <sup>19</sup>F NMR (376 MHz, CDCl<sub>3</sub>) δ –62.2. IR (KBr) (ν/cm<sup>-1</sup>): 3663, 3572, 2964, 1680, 1463, 1348, 1074. HRMS (ESI): *m/z* for C<sub>17</sub>H<sub>14</sub>F<sub>3</sub>O [M+H]<sup>+</sup> calcd 291.0997, found 291.1004.

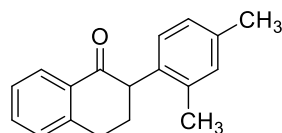

**1r**

**2-(2,4-Dimethylphenyl)-3,4-dihydronaphthalen-1(2H)-one (1r):** White solid (2.1 g, 46%). Mp: 106–107 °C. <sup>1</sup>H NMR (400 MHz, CDCl<sub>3</sub>) δ 8.11 (d, *J* = 8.0 Hz, 1H), 7.50 (t, *J* = 8.0 Hz, 1H), 7.34 (t, *J* = 8.0 Hz, 1H), 7.28 (d, *J* = 8.0 Hz, 1H), 6.28 (s, 1H), 6.81 (s, 2H), 3.72 (dd, *J* = 8.0, 4.0 Hz, 1H), 3.15–3.01 (m, 2H), 2.49–2.37 (m, 2H), 2.31 (s, 6H). <sup>13</sup>C NMR (100 MHz, CDCl<sub>3</sub>) δ 198.5, 144.2, 139.8, 138.0, 133.4, 133.0, 128.9, 128.7, 127.9, 126.8, 126.3, 54.5, 31.3, 29.0, 21.4. IR (KBr) (ν/cm<sup>-1</sup>): 3943, 3730, 3643, 2916, 1710, 1506, 1469, 1218, 750. HRMS (ESI): *m/z* for C<sub>18</sub>H<sub>19</sub>O [M+H]<sup>+</sup> calcd 251.1436, found 251.1440.

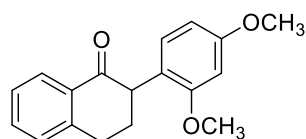

**1s**

**2-(2,4-Dimethoxyphenyl)-3,4-dihydronaphthalen-1(2H)-one (1s):**<sup>[7]</sup> White solid (2.2 g, 39 %). <sup>1</sup>H NMR (400 MHz, CDCl<sub>3</sub>) δ 8.08 (d, *J* = 8.0 Hz, 1H), 7.47 (t, *J* = 8.0 Hz, 1H), 7.31 (t, *J* = 8.0 Hz, 1H), 7.25 (d, *J* = 8.0 Hz, 1H), 6.36 (dd, *J* = 10.8, 2.0 Hz, 3H), 3.74–3.68 (m, 7H), 3.11–2.99 (m, 2H), 2.42–2.37 (m, 2H). <sup>13</sup>C NMR (100 MHz, CDCl<sub>3</sub>): δ 197.8, 160.9, 158.1, 144.1, 142.0, 133.4, 132.9, 128.7, 127.8, 126.8, 106.8, 98.9, 55.2, 54.6, 31.1, 28.8.

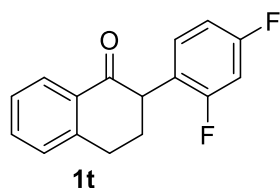

**2-(2,4-Difluorophenyl)-3,4-dihydronaphthalen-1(2H)-one (1t):** White solid (2.3 g, 45%). Mp: 123–124 °C. <sup>1</sup>H NMR (400 MHz, CDCl<sub>3</sub>) δ 8.06 (d, *J* = 8.0 Hz, 1H), 7.50 (t, *J* = 8.0 Hz, 1H), 7.34–7.26 (m, 2H), 6.73–6.67 (m, 3H), 3.74–3.68 (m, 1H), 3.17–3.01 (m, 2H), 2.42–2.31 (m, 2H). <sup>13</sup>C NMR (100 MHz, CDCl<sub>3</sub>): δ 196.8, 163.0 (dd, *J* = 251.0, 12.8 Hz), 143.8, 143.5 (t, *J* = 10.0 Hz), 133.8, 132.5, 128.9, 127.9, 127.0, 111.6 (dd, *J* = 18.0, 6.0 Hz), 102.5 (t, *J* = 25.0 Hz), 54.1, 30.8, 28.9. <sup>19</sup>F NMR (376 MHz, CDCl<sub>3</sub>) δ –110.0. IR (KBr) (v/cm<sup>-1</sup>): 3819, 3698, 3570, 2968, 1680, 1595, 1457, 1125, 981, 867. HRMS (ESI): *m/z* for C<sub>16</sub>H<sub>13</sub>F<sub>2</sub>O [M+H]<sup>+</sup> calcd 259.0934, found 259.0931.

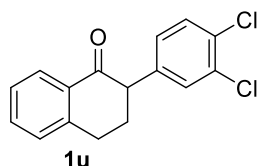

**2-(3,4-Dichlorophenyl)-3,4-dihydronaphthalen-1(2H)-one (1u):** White solid (2.6 g, 56%). Mp: 97–98 °C. <sup>1</sup>H NMR (400 MHz, CDCl<sub>3</sub>) δ 8.07 (d, *J* = 7.8 Hz, 1H), 7.55–7.48 (m, 1H), 7.41 (dd, *J* = 8.3, 1.4 Hz, 1H), 7.35 (t, *J* = 7.6 Hz, 1H), 7.31–7.25 (m, 2H), 7.04 (dt, *J* = 8.3, 1.6 Hz, 1H), 3.75 (t, *J* = 8.4 Hz, 1H), 3.16 (dt, *J* = 16.0, 7.8 Hz, 1H), 3.06 (dt, *J* = 16.9, 4.4 Hz, 1H), 2.43–2.37 (m, 2H). <sup>13</sup>C NMR (100 MHz, CDCl<sub>3</sub>) δ 194.5, 141.3, 137.4, 131.2, 130.0, 129.9, 128.5, 128.0, 127.9, 126.3, 125.5, 125.4, 124.4, 51.2, 28.5, 26.4. IR (KBr) (v/cm<sup>-1</sup>): 3939, 37332, 3574, 2936, 1678, 1605, 1475, 1224, 1032, 738. HRMS (ESI): *m/z* for C<sub>16</sub>H<sub>13</sub>Cl<sub>2</sub>O [M+H]<sup>+</sup> calcd 291.0343, found 291.0344.

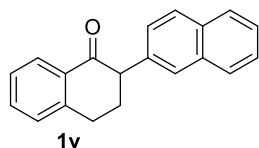

**3,4-Dihydro-[2,2'-binaphthalen]-1(2H)-one (1v):**<sup>[8]</sup> White solid (1.1 g, 51%). <sup>1</sup>H NMR (400 MHz, CDCl<sub>3</sub>) δ 8.13 (dd, *J* = 8.0, 1.6 Hz, 1H), 7.85–7.73 (m, 3H), 7.63 (d, *J* = 1.6 Hz, 1H), 7.51 (td, *J* = 7.6, 1.6 Hz, 1H), 7.48–7.41 (m, 2H), 7.40–7.22 (m, 3H), 3.96 (dd, *J* = 11.2, 4.8 Hz, 1H), 3.22–3.02 (m, 2H), 2.63–2.42 (m, 2H). <sup>13</sup>C NMR (100 MHz, CDCl<sub>3</sub>) δ 198.4, 144.2, 137.4, 133.6, 133.0, 132.7, 129.0, 128.3, 128.0, 127.9, 127.8, 127.2, 126.8, 126.1, 125.8, 54.7, 31.4, 29.0.

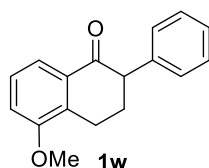

**5-Methoxy-2-phenyl-3,4-dihydronaphthalen-1(2H)-one (1w):**<sup>[9]</sup> White solid. (3.6 g, 72%). <sup>1</sup>H NMR (400 MHz, CDCl<sub>3</sub>) δ 7.69 (d, *J* = 8.0 Hz, 1H), 7.35–7.24 (m, 4H), 7.18 (d, *J* = 8.0 Hz, 2H),



7.03 (d,  $J = 8.0$  Hz, 1H), 3.87 (s, 3H), 3.78 (dd,  $J = 13.0, 8.0$  Hz, 1H), 3.12 (dt,  $J = 16.0, 8.0$  Hz, 1H), 2.90–2.82 (m, 1H), 2.43–2.37 (m, 2H).  $^{13}\text{C}$  NMR (100 MHz,  $\text{CDCl}_3$ )  $\delta$  198.4, 156.8, 139.7, 133.9, 133.1, 128.5, 128.4, 127.0, 126.9, 119.3, 114.3, 53.9, 30.3, 22.3.

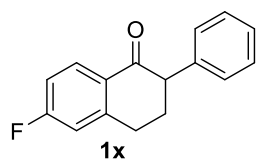

**6-Fluoro-2-phenyl-3,4-dihydronaphthalen-1(2H)-one (1x):** White solid (1.6 g, 75%). Mp: 101–102 °C.  $^1\text{H}$  NMR (400 MHz,  $\text{CDCl}_3$ )  $\delta$  8.13 (dd,  $J = 8.8, 6.0$  Hz, 1H), 7.34 (t,  $J = 7.2$  Hz, 2H), 7.27 (t,  $J = 7.2$  Hz, 1H), 7.18 (d,  $J = 7.2$  Hz, 2H), 7.02 (td,  $J = 8.4, 6.0$  Hz, 1H), 6.96 (dd,  $J = 9.2, 2.0$  Hz, 1H), 3.81–3.77 (m, 1H), 3.14–2.99 (m, 2H), 2.49–2.41 (m, 2H).  $^{13}\text{C}$  NMR (100 MHz,  $\text{CDCl}_3$ )  $\delta$  196.8, 165.8 (d,  $J = 254.0$  Hz), 147.2 (d,  $J = 10.0$  Hz), 139.5, 131.0 (d,  $J = 10.0$  Hz), 129.6 (d,  $J = 2.0$  Hz), 128.6, 128.4, 127.1, 115.1 (d,  $J = 100.0$  Hz), 114.5 (d,  $J = 21.0$  Hz), 54.1, 31.0, 28.9 (d,  $J = 1.0$  Hz).  $^{19}\text{F}$  NMR (376 MHz,  $\text{CDCl}_3$ )  $\delta$  –104.7 (d,  $J = 5.4$  Hz). IR (KBr) ( $\text{v}/\text{cm}^{-1}$ ): 3653, 3673, 3566, 2948, 1684, 1609, 1483, 1236, 1096, 872, 691. HRMS (ESI):  $m/z$  for  $\text{C}_{16}\text{H}_{14}\text{FO}$   $[\text{M}+\text{H}]^+$  calcd 241.1029, found 241.1033.

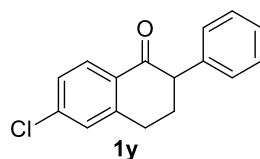

**6-Chloro-2-phenyl-3,4-dihydronaphthalen-1(2H)-one (1y):** White solid (1.0 g, 71%). Mp: 83–84 °C.  $^1\text{H}$  NMR (400 MHz,  $\text{CDCl}_3$ )  $\delta$  8.03 (d,  $J = 8.0$  Hz, 1H), 7.36–7.25 (m, 5H), 7.17 (d,  $J = 8.0$  Hz, 2H), 3.82–3.75 (m, 1H), 3.12–2.97 (m, 2H), 2.45–2.40 (m, 2H).  $^{13}\text{C}$  NMR (100 MHz,  $\text{CDCl}_3$ )  $\delta$  197.2, 145.7, 139.6, 139.4, 131.3, 129.5, 128.7, 128.6, 128.4, 127.3, 127.1, 54.2, 30.9, 28.6. IR (KBr) ( $\text{v}/\text{cm}^{-1}$ ): 3870, 3744, 3570, 3025, 2952, 1678, 1585, 1455, 1218, 1082, 872, 752. HRMS (ESI):  $m/z$  for  $\text{C}_{16}\text{H}_{14}\text{ClO}$   $[\text{M}+\text{H}]^+$  calcd 257.0733, found 257.0739.

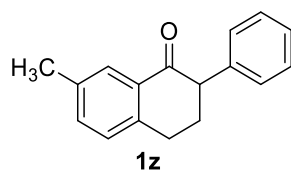

**7-Methyl-2-phenyl-3,4-dihydronaphthalen-1(2H)-one (1z):** White solid (1.6 g, 71%). Mp: 66–67 °C.  $^1\text{H}$  NMR (400 MHz,  $\text{CDCl}_3$ )  $\delta$  7.91 (d,  $J = 4.0$  Hz, 1H), 7.36–7.29 (m, 3H), 7.28–7.23 (m, 1H), 7.21–7.15 (m, 3H), 3.82–3.73 (m, 1H), 3.11–2.95 (m, 2H), 2.44–2.39 (m, 2H), 2.38 (s, 3H).  $^{13}\text{C}$  NMR (100 MHz,  $\text{CDCl}_3$ )  $\delta$  198.5, 141.2, 140.0, 136.5, 134.5, 132.7, 128.8, 128.6, 128.5, 127.9, 126.9, 54.4, 31.4, 28.3, 21.0. IR (KBr) ( $\text{v}/\text{cm}^{-1}$ ): 3746, 3645, 3556, 3033, 2938, 1680, 1498, 1240, 906, 819, 701. HRMS (ESI):  $m/z$  for  $\text{C}_{16}\text{H}_{13}\text{Cl}_2\text{O}$   $[\text{M}+\text{H}]^+$  calcd 237.1279, found 237.1280.

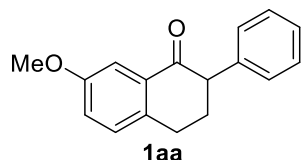

**7-Methoxy-2-phenyl-3,4-dihydronaphthalen-1(2H)-one (1aa):**<sup>[9]</sup> White solid (4.1 g, 81%). <sup>1</sup>H NMR (400 MHz, CDCl<sub>3</sub>)  $\delta$  7.57 (d,  $J$  = 4.0 Hz, 1H), 7.33 (t,  $J$  = 8.0 Hz, 2H), 7.27–7.24 (m, 1H), 7.19–7.16 (m, 3H), 7.08 (dd,  $J$  = 8.0, 4.0 Hz, 1H), 3.83 (s, 3H), 3.77 (t,  $J$  = 4.0 Hz, 1H), 3.07–2.93 (m, 2H), 2.42–2.37 (m, 2H).

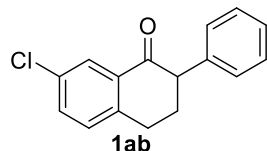

**7-Chloro-2-phenyl-3,4-dihydronaphthalen-1(2H)-one (1ab):** White solid. (1.3 g, 63%). Mp: 85–86 °C. <sup>1</sup>H NMR (400 MHz, CDCl<sub>3</sub>)  $\delta$  8.05 (d,  $J$  = 2.4 Hz, 1H), 7.45 (dd,  $J$  = 8.2, 2.4 Hz, 1H), 7.37–7.33 (m, 2H), 7.31–7.28 (m, 1H), 7.26–7.22 (m, 1H), 7.18–7.16 (m, 2H), 3.85–3.73 (m, 1H), 3.15–2.97 (m, 2H), 2.45–2.40 (m, 2H). <sup>13</sup>C NMR (100 MHz, CDCl<sub>3</sub>)  $\delta$  197.1, 142.3, 139.2, 134.1, 133.3, 133.0, 130.4, 128.6, 128.4, 127.5, 127.1, 54.1, 31.0, 28.2. IR (KBr) ( $\nu$ /cm<sup>-1</sup>): 3375, 2922, 2851, 1701, 1664, 1529, 1438, 1355, 778, 704. HRMS (ESI):  $m/z$  for C<sub>16</sub>H<sub>14</sub>ClO [M+H]<sup>+</sup> calcd 257.0733, found 257.0735.

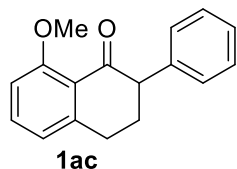

**8-Methoxy-2-phenyl-3,4-dihydronaphthalen-1(2H)-one (1ac):**<sup>[2]</sup> White solid (0.72 g, 51%). <sup>1</sup>H NMR (400 MHz, CDCl<sub>3</sub>)  $\delta$  7.40 (t,  $J$  = 8.0 Hz, 1H), 7.33–7.29 (m, 2H), 7.27–7.22 (m, 1H), 7.22–7.17 (m, 2H), 6.85 (dd,  $J$  = 8.4, 5.2 Hz, 2H), 3.88 (s, 3H), 3.79 (dd,  $J$  = 9.2, 6.4 Hz, 1H), 3.10–2.97 (m, 2H), 2.42–2.31 (m, 2H). <sup>13</sup>C NMR (100 MHz, CDCl<sub>3</sub>)  $\delta$  197.4, 160.6, 146.5, 140.2, 134.0, 128.5, 128.4, 126.7, 122.6, 120.7, 110.0, 55.9, 55.1, 30.6, 29.5.

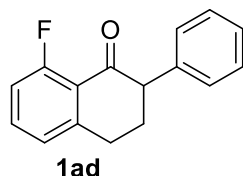

**8-Fluoro-2-phenyl-3,4-dihydronaphthalen-1(2H)-one (1ad):** Pale yellow solid (0.94 g, 64%). Mp: 55–57 °C. <sup>1</sup>H NMR (400 MHz, CDCl<sub>3</sub>)  $\delta$  7.44–7.39 (m, 1H), 7.34–7.30 (m, 2H), 7.29–7.22 (m, 1H), 7.21–7.16 (m, 2H), 7.05 (d,  $J$  = 7.6 Hz, 1H), 6.97 (dd,  $J$  = 11.2, 8.4 Hz, 1H), 3.86–3.72 (m, 1H), 3.11–3.01 (m, 2H), 2.43–2.37 (m, 2H). <sup>13</sup>C NMR (100 MHz, CDCl<sub>3</sub>)  $\delta$  196.1, 162.4 (d,  $J$  = 265.0 Hz), 146.3, 139.2, 134.4 (d,  $J$  = 10.2 Hz), 128.5, 128.4, 127.0, 124.4 (d,  $J$  = 4.1 Hz), 121.8 (d,

$J = 5.0$  Hz), 115.1 (d,  $J = 21.0$  Hz), 55.2, 30.5, 28.9 (d,  $J = 3.0$  Hz).  $^{19}\text{F}$  NMR (376 MHz,  $\text{CDCl}_3$ )  $\delta$  -111.3. IR (KBr) ( $\text{v}/\text{cm}^{-1}$ ): 3749, 1699, 1608, 1465, 1213, 700. HRMS (ESI):  $m/z$  for  $\text{C}_{16}\text{H}_{14}\text{OF}$   $[\text{M}+\text{H}]^+$  calcd 241.1029, found 241.1029.

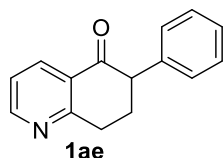

**6-Phenyl-7,8-dihydroquinolin-5(6H)-one (1ae):**<sup>[2]</sup> Pale yellow solid (0.9 g, 48%).  $^1\text{H}$  NMR (400 MHz,  $\text{CDCl}_3$ )  $\delta$  8.69 (dd,  $J = 4.8, 1.6$  Hz, 1H), 8.32 (dd,  $J = 8.0, 2.0$  Hz, 1H), 7.40–7.23 (m, 4H), 7.19–7.17 (m, 1H), 3.82 (dd,  $J = 9.2, 7.2$  Hz, 1H), 3.29–3.26 (m, 2H), 2.52–2.41 (m, 2H).  $^{13}\text{C}$  NMR (100 MHz,  $\text{CDCl}_3$ )  $\delta$  197.7, 163.2, 153.6, 138.9, 135.7, 128.6, 128.4, 128.3, 127.2, 122.4, 53.9, 31.9, 29.7.

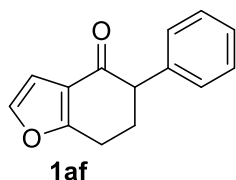

**5-Phenyl-6,7-dihydrobenzofuran-4(5H)-one (1af):**<sup>[2]</sup> Yellow solid (0.82 g, 21%).  $^1\text{H}$  NMR (400 MHz,  $\text{CDCl}_3$ )  $\delta$  7.38–7.29 (m, 3H), 7.29–7.23 (m, 1H), 7.20–7.12 (m, 2H), 6.73 (d,  $J = 2.0$  Hz, 1H), 3.71 (dd,  $J = 8.4, 6.0$  Hz, 1H), 3.01–2.87 (m, 2H), 2.48–2.36 (m, 2H).  $^{13}\text{C}$  NMR (100 MHz,  $\text{CDCl}_3$ )  $\delta$  194.1, 166.5, 143.0, 139.2, 128.6, 128.2, 127.0, 121.5, 107.0, 53.1, 31.0, 22.7.

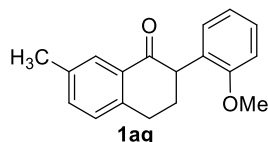

**2-(2-Methoxyphenyl)-7-methyl-3,4-dihydronaphthalen-1(2H)-one (1ag):** White solid (1.6 g, 63%). Mp: 112–113 °C.  $^1\text{H}$  NMR (400 MHz,  $\text{CDCl}_3$ )  $\delta$  7.90 (d,  $J = 2.4$  Hz, 1H), 7.30–7.19 (m, 2H), 7.15–7.13 (m, 1H), 7.07 (dd,  $J = 7.6, 2.0$  Hz, 1H), 6.93–6.85 (m, 2H), 4.01 (dd,  $J = 12.0, 3.6$  Hz, 1H), 3.71 (s, 3H), 3.08–3.00 (m, 1H), 2.93 (dt,  $J = 16.4, 4.0$  Hz, 1H), 2.50–2.40 (m, 1H), 2.35 (s, 3H), 2.25–2.20 (m, 1H).  $^{13}\text{C}$  NMR (100 MHz,  $\text{CDCl}_3$ )  $\delta$  198.3, 157.2, 141.3, 136.3, 134.1, 133.0, 129.8, 129.6, 128.7, 128.2, 127.8, 120.8, 111.2, 55.5, 50.1, 30.2, 29.1, 21.1. IR (KBr) ( $\text{v}/\text{cm}^{-1}$ ): 3900, 3746, 3578, 2944, 1688, 1500, 1451, 1275, 1167, 1034, 898, 708. HRMS (ESI):  $m/z$  for  $\text{C}_{16}\text{H}_{14}\text{ClO}$   $[\text{M}+\text{H}]^+$  calcd 267.1385, found 267.1390.

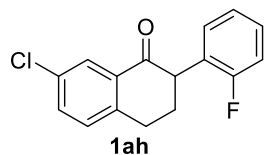

**7-Chloro-2-(2-fluorophenyl)-3,4-dihydronaphthalen-1(2H)-one (1ah):** White solid (1.3 g, 58%).

Mp: 122–123 °C. <sup>1</sup>H NMR (400 MHz, CDCl<sub>3</sub>) δ 8.05 (d, *J* = 2.3 Hz, 1H), 7.45 (dd, *J* = 8.4, 2.4 Hz, 1H), 7.32–7.26 (m, 1H), 7.23 (s, 1H), 7.18–7.04 (m, 3H), 3.98 (dd, *J* = 12.4, 4.4 Hz, 1H), 3.17–3.09 (m, 1H), 3.02 (dt, *J* = 16.8, 4.0 Hz, 1H), 2.52–2.41 (m, 1H), 2.38–2.31 (m, 1H). <sup>13</sup>C NMR (100 MHz, CDCl<sub>3</sub>) δ 195.6, 160.9 (d, *J* = 244.5 Hz), 142.2, 133.8, 133.4, 133.3, 130.4, 129.9 (d, *J* = 4.6 Hz), 128.9 (d, *J* = 8.3 Hz), 127.5, 126.9 (d, *J* = 15.0 Hz), 124.3 (d, *J* = 8.0 Hz), 115.6 (d, *J* = 22.0 Hz), 49.2, 30.0 (d, *J* = 1.5 Hz), 28.9. <sup>19</sup>F NMR (376 MHz, CDCl<sub>3</sub>) δ –116.3. IR (KBr) (v/cm<sup>-1</sup>): 3807, 3647, 3566, 2940, 1682, 1236, 902, 762. HRMS (ESI): *m/z* for C<sub>16</sub>H<sub>13</sub>ClFO [M+H]<sup>+</sup> calcd 275.0639, found 275.0641.

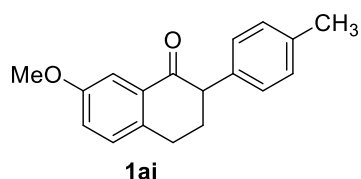

**7-Methoxy-2-(4-tolyl)-3,4-dihydronaphthalen-1(2H)-one (1ai):**<sup>[10]</sup> White solid (2.2 g, 91%). <sup>1</sup>H NMR (400 MHz, CDCl<sub>3</sub>) δ 7.90 (d, *J* = 2.4 Hz, 1H), 7.29–7.18 (m, 2H), 7.16–7.04 (m, 2H), 6.93–6.85 (m, 2H), 4.01 (dd, *J* = 12.1, 4.6 Hz, 1H), 3.71 (s, 3H), 3.03 (ddd, *J* = 16.3, 11.7, 4.4 Hz, 1H), 2.93 (dt, *J* = 16.4, 4.2 Hz, 1H), 2.50–2.38 (m, 1H), 2.35 (s, 3H), 2.25–2.12 (m, 1H). <sup>13</sup>C NMR (100 MHz, CDCl<sub>3</sub>) δ 198.3, 158.5, 136.9, 136.8, 136.5, 133.8, 130.1, 129.3, 128.3, 121.7, 109.8, 55.5, 53.9, 31.7, 28.0, 21.1.

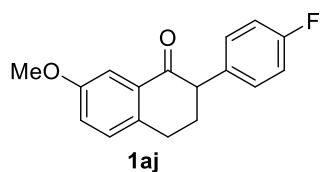

**2-(4-Fluorophenyl)-7-methoxy-3,4-dihydronaphthalen-1(2H)-one (1aj):** White solid (1.2 g, 54%). Mp: 88–89 °C. <sup>1</sup>H NMR (400 MHz, CDCl<sub>3</sub>) δ 7.54 (d, *J* = 3.2 Hz, 1H), 7.20–7.10 (m, 3H), 7.10–6.96 (m, 3H), 3.80 (s, 3H), 3.75–3.66 (m, 1H), 3.07–2.88 (m, 2H), 2.37–2.31 (m, 2H). <sup>13</sup>C NMR (100 MHz, CDCl<sub>3</sub>) δ 207.6, 161.8 (d, *J* = 243.4 Hz), 158.5, 136.6, 135.6 (d, *J* = 3.3 Hz), 133.5, 130.1 (d, *J* = 4.8 Hz), 123.0, 121.8, 115.3 (d, *J* = 21.1 Hz), 109.8, 55.5, 53.6, 31.6, 28.1. <sup>19</sup>F NMR (376 MHz, CDCl<sub>3</sub>) δ –116.0. IR (KBr) (v/cm<sup>-1</sup>): 3765, 3653, 2950, 1694, 1613, 1504, 1433, 1177, 1032, 857, 746, 572. HRMS (ESI): *m/z* for C<sub>17</sub>H<sub>16</sub>FO<sub>2</sub> [M+H]<sup>+</sup> calcd 271.1134, found 271.1136.

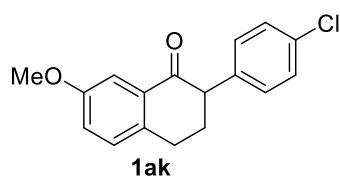

**2-(4-Chlorophenyl)-7-methoxy-3,4-dihydronaphthalen-1(2H)-one (1ak):** White solid (1.4 g, 63%). Mp: 95–96 °C. <sup>1</sup>H NMR (400 MHz, CDCl<sub>3</sub>) δ 7.54 (d, *J* = 2.8 Hz, 1H), 7.33–7.26 (m, 2H),

7.19–7.17 (m, 1H), 7.13–7.06 (m, 3H), 3.82 (s, 3H), 3.76–3.69 (m, 1H), 3.08–2.92 (m, 2H), 2.40–2.32 (m, 2H). <sup>13</sup>C NMR (100 MHz, CDCl<sub>3</sub>) δ 197.7, 158.5, 138.4, 136.6, 133.4, 132.8, 130.1, 129.9, 128.7, 121.9, 109.7, 55.5, 53.7, 31.4, 28.0. IR (KBr) (v/cm<sup>-1</sup>): 3749, 3653, 2938, 1674, 1611, 1503, 1242, 1030, 874, 838, 734. HRMS (ESI): *m/z* for C<sub>17</sub>H<sub>16</sub>ClO<sub>2</sub> [M+H]<sup>+</sup> calcd 287.0839, found 287.0844.

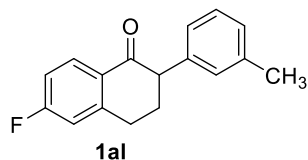

**6-Fluoro-2-(3-tolyl)-3,4-dihydronaphthalen-1(2H)-one (1al):** White solid (1.3 g, 62%). Mp: 111–112 °C. <sup>1</sup>H NMR (400 MHz, CDCl<sub>3</sub>) δ 8.12 (dd, *J* = 8.8, 6.0 Hz, 1H), 7.25–7.19 (m, 1H), 7.09–7.07 (m, 1H), 7.03–6.91 (m, 4H), 3.74 (dd, *J* = 10.0, 6.0 Hz, 1H), 3.12–2.98 (m, 2H), 2.47–2.36 (m, 2H), 2.33 (s, 3H). <sup>13</sup>C NMR (100 MHz, CDCl<sub>3</sub>) δ 196.9, 165.8 (d, *J* = 254.1 Hz), 147.2 (d, *J* = 31.7 Hz), 139.4, 138.2, 131.0 (d, *J* = 9.6 Hz), 129.6 (d, *J* = 2.8 Hz), 129.2, 128.5, 127.9, 125.4, 115.1 (d, *J* = 21.0 Hz), 114.5 (d, *J* = 22.0 Hz), 54.1, 31.1, 28.9 (d, *J* = 1.7 Hz), 21.5. <sup>19</sup>F NMR (376 MHz, CDCl<sub>3</sub>) δ –104.8. IR (KBr) (v/cm<sup>-1</sup>): 3738, 3651, 3580, 2948, 1704, 1587, 1496, 1271, 1107, 801, 707. HRMS (ESI): *m/z* for C<sub>17</sub>H<sub>16</sub>FO [M+H]<sup>+</sup> calcd 255.1185, found 255.1188.

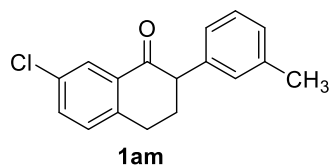

**7-Chloro-2-(3-tolyl)-3,4-dihydronaphthalen-1(2H)-one (1am):** White solid (1.2 g, 53%). Mp: 128–129 °C. <sup>1</sup>H NMR (400 MHz, CDCl<sub>3</sub>) δ 8.04 (d, *J* = 2.4 Hz, 1H), 7.44 (dd, *J* = 8.4, 2.4 Hz, 1H), 7.25–7.19 (m, 2H), 7.11–7.06 (m, 1H), 6.99–6.93 (m, 2H), 3.79–3.69 (m, 1H), 3.10–2.96 (m, 2H), 2.43–2.36 (m, 2H), 2.33 (s, 3H). <sup>13</sup>C NMR (100 MHz, CDCl<sub>3</sub>) δ 197.2, 142.3, 139.2, 138.2, 134.1, 133.3, 133.0, 130.4, 129.2, 128.5, 127.9, 127.5, 125.4, 54.1, 31.0, 28.3, 21.5. IR (KBr) (v/cm<sup>-1</sup>): 3744, 3566, 2932, 1692, 1437, 1206, 904, 705. HRMS (ESI): *m/z* for C<sub>17</sub>H<sub>16</sub>ClO [M+H]<sup>+</sup> calcd 271.0890, found 271.0895.

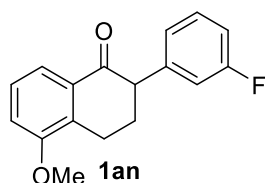

**2-(3-Fluorophenyl)-5-methoxy-3,4-dihydronaphthalen-1(2H)-one (1an):** White solid (1.2 g, 53%). Mp: 91–92 °C. <sup>1</sup>H NMR (400 MHz, CDCl<sub>3</sub>) δ 7.68 (dd, *J* = 7.6, 0.8 Hz, 1H), 7.30–7.24 (m, 2H), 7.02 (dd, *J* = 8.0, 1.2 Hz, 1H), 7.00–6.86 (m, 3H), 3.84 (s, 3H), 3.73 (dd, *J* = 11.2, 5.2 Hz, 1H),

3.13 (dt,  $J = 18.0, 4.4$  Hz, 1H), 2.83 (ddd,  $J = 17.6, 10.0, 4.8$  Hz, 1H), 2.42–2.25 (m, 2H).  $^{13}\text{C}$  NMR (100 MHz,  $\text{CDCl}_3$ )  $\delta$  197.6, 162.8 (d,  $J = 243.8$  Hz), 156.8, 142.1 (d,  $J = 7.3$  Hz), 133.6, 132.9, 129.8 (d,  $J = 8.3$  Hz), 127.0, 124.2 (d,  $J = 2.9$  Hz), 119.2, 115.4 (d,  $J = 21.4$  Hz), 114.4, 113.7 (d,  $J = 20.8$  Hz), 55.6, 53.5 (d,  $J = 1.8$  Hz), 30.0, 22.3.  $^{19}\text{F}$  NMR (376 MHz,  $\text{CDCl}_3$ )  $\delta$  -113.2. IR (KBr) ( $\text{v}/\text{cm}^{-1}$ ): 3744, 3566, 2934, 1692, 1507, 1459, 1038, 759, 742. HRMS (ESI):  $m/z$  for  $\text{C}_{17}\text{H}_{16}\text{FO}_2$   $[\text{M}+\text{H}]^+$  calcd 271.1134, found 271.1138.

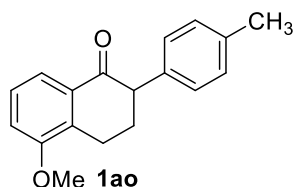

**5-Methoxy-2-(4-tolyl)-3,4-dihydronaphthalen-1(2H)-one (1ao):** White solid (2.3 g, 93%). Mp: 122–123 °C.  $^1\text{H}$  NMR (400 MHz,  $\text{CDCl}_3$ )  $\delta$  7.70 (d,  $J = 8.0$  Hz, 1H), 7.31–7.24 (m, 1H), 7.14 (d,  $J = 8.0$  Hz, 2H), 7.08–7.02 (m, 3H), 3.87 (s, 3H), 3.74 (dd,  $J = 8.0, 4.0$  Hz, 1H), 3.12 (dt,  $J = 20.0, 4.0$  Hz, 1H), 2.89–2.81 (m, 1H), 2.41–2.35 (m, 2H), 3.33 (s, 3H).  $^{13}\text{C}$  NMR (100 MHz,  $\text{CDCl}_3$ )  $\delta$  198.4, 156.9, 136.7, 136.4, 134.1, 133.2, 129.3, 128.2, 127.1, 119.4, 114.2, 55.7, 53.5, 30.3, 22.4, 21.2. IR (KBr) ( $\text{v}/\text{cm}^{-1}$ ): 3874, 3728, 3657, 2938, 1696, 1597, 1496, 1250, 1042, 760, 732. HRMS (ESI):  $m/z$  for  $\text{C}_{18}\text{H}_{19}\text{O}_2$   $[\text{M}+\text{H}]^+$  calcd 267.1385, found 267.1385.

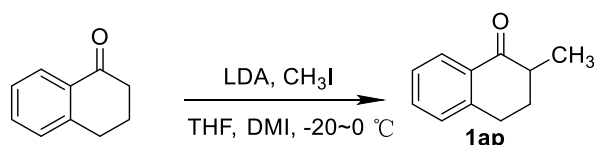

**2-Methyl-3,4-dihydronaphthalen-1(2H)-one (1ap):**<sup>[11]</sup> A THF solution of LDA (10.4 mL, 20.8 mmol, 2 mol/L) was added slowly to THF (50 mL) at -20 °C under  $\text{N}_2$  atmosphere and then 1-tetralone (2.8 g, 18.9 mmol) was added, and stirred for 1 h at 0 °C. Subsequently,  $\text{CH}_3\text{I}$  (2.5 g, 18.9 mmol) and 1,3-dimethyl-2-imidazolidinone (DMI, 2.1 g, 18.9 mmol) were added to the reaction mixture. After stirring for a further 12 h at 0 °C, water (20 mL) was added followed by extraction with EtOAc (3  $\times$  20 mL). The combined organic layer was washed with brine (50 mL), dried over anhydrous  $\text{Na}_2\text{SO}_4$ , and concentrated under reduced pressure to afford the crude product. Purification by a silica gel column chromatography (PE/EtOAc = 20/1) gave the product (**1ap**) as colorless oil (0.4 g, 31% yield).  $^1\text{H}$  NMR (400 MHz,  $\text{CDCl}_3$ )  $\delta$  8.02 (dd,  $J = 8.0, 1.6$  Hz, 1H), 7.43 (td,  $J = 7.6, 1.6$  Hz, 1H), 7.32–7.19 (m, 2H), 3.08–2.90 (m, 2H), 2.63–2.52 (m, 1H), 2.21–2.15 (m, 1H), 1.93–1.81 (m, 1H), 1.25 (d,  $J = 6.8$  Hz, 3H).  $^{13}\text{C}$  NMR (100 MHz,  $\text{CDCl}_3$ )  $\delta$  201.0, 144.3, 133.2, 132.5, 128.8, 127.5, 126.7, 42.8, 31.5, 29.0, 15.6.

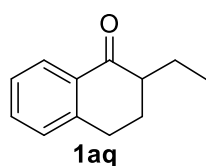

**2-Ethyl-3,4-dihydronaphthalen-1(2H)-one (1aq):**<sup>[12]</sup> Colorless oily liquid (0.35 g, 32%). <sup>1</sup>H NMR (400 MHz, CDCl<sub>3</sub>)  $\delta$  8.03 (dd,  $J$  = 8.0, 1.6 Hz, 1H), 7.45 (td,  $J$  = 7.2, 1.2 Hz, 1H), 7.29 (t,  $J$  = 7.6 Hz, 1H), 7.23 (d,  $J$  = 7.6 Hz, 1H), 3.04–2.94 (m, 2H), 2.47–2.36 (m, 1H), 2.27–2.20 (m, 1H), 2.03–1.84 (m, 2H), 1.60–1.53 (m, 1H), 1.00 (t,  $J$  = 7.6 Hz, 3H). <sup>13</sup>C NMR (100 MHz, CDCl<sub>3</sub>)  $\delta$  200.4, 144.1, 133.2, 132.7, 128.8, 127.5, 126.6, 49.0, 28.5, 27.9, 22.5, 11.6.

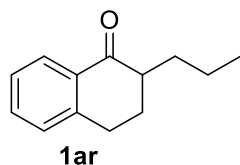

**2-Propyl-3,4-dihydronaphthalen-1(2H)-one (1ar):**<sup>[13]</sup> Colorless oily liquid (0.3 g, 26%). <sup>1</sup>H NMR (400 MHz, CDCl<sub>3</sub>)  $\delta$  8.02 (dd,  $J$  = 8.0, 1.6 Hz, 1H), 7.44 (td,  $J$  = 7.6, 1.6 Hz, 1H), 7.28 (td,  $J$  = 7.6, 1.2 Hz, 1H), 7.22 (d,  $J$  = 7.6 Hz, 1H), 3.04–2.91 (m, 2H), 2.51–2.41 (m, 1H), 2.26–2.19 (m, 1H), 2.00–1.83 (m, 2H), 1.55–1.33 (m, 3H), 0.95 (t,  $J$  = 7.2 Hz, 3H). <sup>13</sup>C NMR (100 MHz, CDCl<sub>3</sub>)  $\delta$  200.6, 144.1, 133.2, 132.7, 128.8, 127.5, 126.6, 47.3, 31.7, 28.4, 28.3, 20.3, 14.3.

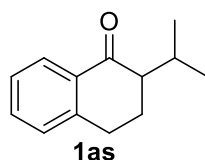

**2-Isopropyl-3,4-dihydronaphthalen-1(2H)-one (1as):**<sup>[13]</sup> Colorless oily liquid (0.26 g, 31%). <sup>1</sup>H NMR (400 MHz, CDCl<sub>3</sub>)  $\delta$  8.02 (dd,  $J$  = 8.0, 1.6 Hz, 1H), 7.43 (td,  $J$  = 7.2, 1.2 Hz, 1H), 7.27 (t,  $J$  = 7.6 Hz, 1H), 7.21 (d,  $J$  = 7.6 Hz, 1H), 3.09–2.88 (m, 2H), 2.56–2.48 (m, 1H), 2.33–2.28 (m, 1H), 2.17–2.10 (m, 1H), 1.98–1.84 (m, 1H), 1.00 (d,  $J$  = 7.2 Hz, 3H), 0.90 (d,  $J$  = 6.8 Hz, 3H). <sup>13</sup>C NMR (100 MHz, CDCl<sub>3</sub>)  $\delta$  199.9, 144.0, 133.07, 133.05, 128.7, 127.5, 126.6, 53.8, 28.6, 26.3, 23.6, 20.7, 18.6.

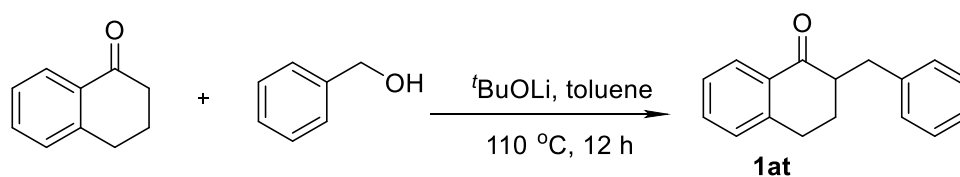

**2-Benzyl-3,4-dihydronaphthalen-1(2H)-one (1at):**<sup>[11]</sup> Under a N<sub>2</sub> atmosphere, <sup>t</sup>BuOLi (40.0 mmol, 2.0 equiv),  $\alpha$ -tetralone (20.0 mmol, 1.0 equiv), benzyl alcohol (30 mmol, 1.5 equiv) and toluene (60 mL) were added respectively to a 50 mL three-necked flask equipped with a magnetic stir bar. The reaction was stirred for 12 h at 110 °C (oil bath), then cooled to room temperature. The reaction mixture was diluted and extracted with EtOAc, washed with water, and dried over anhydrous Na<sub>2</sub>SO<sub>4</sub>. The filtrate was concentrated in vacuo and the residue was purified by a silica gel column chromatography (PE/EtOAc = 20/1) to afford **1at** as pale yellow solid (1.2g, 53%). <sup>1</sup>H NMR (400 MHz, CDCl<sub>3</sub>)  $\delta$  8.09 (dd,  $J$  = 8.0, 1.6 Hz, 1H), 7.47 (td,  $J$  = 7.2, 1.2 Hz, 1H), 7.35–7.30 (m, 3H), 7.27–7.20 (m, 4H), 3.51 (dd,  $J$  = 13.6, 4.0 Hz, 1H), 2.96–2.92 (m, 2H), 2.80–2.74 (m, 1H), 2.66 (dd,  $J$  = 13.6, 9.6 Hz, 1H), 2.15–2.09 (m, 1H), 1.86–1.76 (m, 1H).

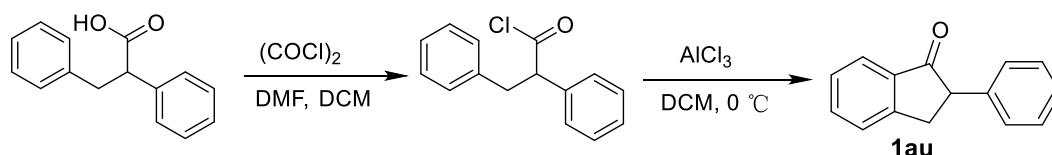

**2-Phenyl-2,3-dihydro-1H-inden-1-one (1au):**<sup>[14]</sup> To a stirred solution of 2,3-diphenylpropanoic acid (1.8 g, 8.0 mmol) and oxalyl chloride (1.2 equiv, 4.8 mL) in DCM, a solution of DMF (10 mol%) in DCM was slowly added at 0 °C. The reaction mixture was stirred for 1 h at this temperature and was allowed to warm up to room temperature over 1 h. Solvent and excess oxalyl chloride were then removed under reduced pressure to afford 2,3-diphenylpropanoyl chloride, which was directly submitted to the next step. 2,3-Diphenylpropanoyl chloride was resolved in DCM (20 mL) and AlCl<sub>3</sub> (3.4 g, 3.2 equiv) were subsequently added to this solution at 0 °C. The reaction mixture was stirred for 1 h at this temperature. Upon completion, the reaction was quenched with saturated aqueous NH<sub>4</sub>Cl, extracted with DCM, dried over Na<sub>2</sub>SO<sub>4</sub>, filtered, and concentrated. The residue was purified by a silica gel column chromatography (PE/EtOAc = 10/1) to afford **1au** as white solid (0.5 g, 33%). <sup>1</sup>H NMR (400 MHz, CDCl<sub>3</sub>) δ 7.74 (d, *J* = 7.6 Hz, 1H), 7.57 (td, *J* = 7.6, 2.0 Hz, 1H), 7.49–7.39 (m, 1H), 7.35 (t, *J* = 7.6 Hz, 1H), 7.27–7.22 (m, 2H), 7.20–7.15 (m, 1H), 7.14–7.07 (m, 2H), 3.83 (dd, *J* = 8.4, 4.0 Hz, 1H), 3.62 (dd, *J* = 17.2, 8.0 Hz, 1H), 3.20 (dd, *J* = 17.6, 4.4 Hz, 1H). <sup>13</sup>C NMR (100 MHz, CDCl<sub>3</sub>) δ 206.0, 153.7, 139.7, 136.3, 135.1, 128.9, 127.9, 127.8, 127.1, 126.5, 124.6, 53.4, 35.9.

### 3. Asymmetric Hydrogenation of $\alpha$ -Substituted Tetralones

#### 3.1 Hydrogen pressure and solvents screening

Initially, the asymmetric hydrogenation of  $\alpha$ -phenyl tetralones (**1a**) using RuPHOX-Ru (1 mol%) was carried out under 40 bar hydrogen pressure with <sup>t</sup>BuOK as a base in <sup>t</sup>AmOH at RT over 24 h (Table S1, entry 1). To our delight, the reaction provided complete conversion and excellent ee and dr values (99.1% ee and >20:1 dr). These promising results prompted us to further investigate the use of lower hydrogen pressures. It was found that reducing the hydrogen pressure from 40 bar to 2 bar showed nearly no change in either conversion or diastereoselectivity (entries 2~5). Further reducing hydrogen pressure by using a hydrogen balloon resulted in only a trace amount of product being detected (entry 6). The following asymmetric hydrogenation was therefore carried out under 2 bar hydrogen pressure to examine the effect of various solvents on the reaction. Full conversions with excellent enantio- and diastereoselectivities were obtained in alcoholic solvents such as <sup>t</sup>BuOH, <sup>i</sup>PrOH and EtOH (entries 7~9). However, when MeOH was employed in the reaction, the conversion was sharply reduced with unsatisfactory enantio- and diastereoselectivities (entry 10), mostly likely due to strong hydrogen bonding interactions. Aprotic solvent such as DCM only gave the desired product in 21% conversion, 2:1 dr and 71% ee (entry 11). No reaction was detected in the polar aprotic solvent THF (entry 12). We chose EtOH as the reaction solvent owing to it being high performing and inexpensive.



**Table S1. Hydrogen pressure and solvents screening**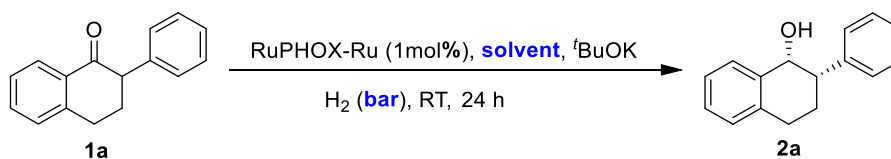

| entry | solvent        | H <sub>2</sub> (bar) | conv <sup>b</sup> (%) | ee <sup>c</sup> (%) | dr <sup>b</sup> |
|-------|----------------|----------------------|-----------------------|---------------------|-----------------|
| 1     | <i>t</i> -AmOH | 40                   | >99                   | 99.1                | >20:1           |
| 2     | <i>t</i> -AmOH | 20                   | >99                   | 99.1                | >20:1           |
| 3     | <i>t</i> -AmOH | 10                   | >99                   | 99.4                | >20:1           |
| 4     | <i>t</i> -AmOH | 5                    | >99                   | 99.4                | >20:1           |
| 5     | <i>t</i> -AmOH | 2                    | >99                   | 99.1                | >20:1           |
| 6     | <i>t</i> -AmOH | balloon              | trace                 | -                   | -               |
| 7     | <i>t</i> -BuOH | 2                    | >99                   | 98                  | >20:1           |
| 8     | <i>i</i> -PrOH | 2                    | >99                   | 98                  | >20:1           |
| 9     | EtOH           | 2                    | >99                   | 99.1                | >20:1           |
| 10    | MeOH           | 2                    | 57                    | 46                  | 10:1            |
| 11    | DCM            | 2                    | 21                    | 71                  | 2:1             |
| 12    | THF            | 2                    | NP <sup>d</sup>       | -                   | -               |

<sup>a</sup> Reaction conditions: **1a** (0.15 mmol), (*S,S*)-RuPHOX-Ru (1.0 mol%) and <sup>t</sup>BuOK (1.0 equiv) in a suitable solvent (1.5 mL) under a certain hydrogen pressure at RT for 24 h. <sup>b</sup> Determined by <sup>1</sup>H NMR. <sup>c</sup> Determined by chiral HPLC analysis of **2a** using an IA column. <sup>d</sup>“NP” means no product detected.

### 3.2 Base screening

The effect of the base on this reaction was then examined (Table S2). Organic bases, such as <sup>t</sup>BuOK, <sup>t</sup>BuONa, and <sup>t</sup>BuOLi afforded full conversion and excellent enantio- and diastereoselectivities (entries 1~3). Slightly inferior results were obtained when DBU was used as a base (entry 4). Inorganic bases were also found to be suitable for the reaction. Both alkali hydroxides (KOH and NaOH) and alkali carbonates (K<sub>2</sub>CO<sub>3</sub> and Na<sub>2</sub>CO<sub>3</sub>) gave full conversions and 94~98% ees and >20:1 drs (entries 5~8). Next, the amount of <sup>t</sup>BuONa was investigated in the reaction (entries 9~10). It was shown that the amount of base had little effect on the reaction and almost the same catalytic behavior was obtained when the catalyst loading was reduced from 1 to 0.2 equiv. The reaction activity of the asymmetric hydrogenation was also investigated and it was found the reaction could go to completion with a very low catalyst loading (0.2 mol%, entry 11~12). When the reaction time was shortened to 2 hours, no significant effect on the activity was observed (entries 13~15). However, the reaction cannot go to completion in an hour (entry 16). Therefore, the optimal reaction conditions were chosen as the following: using 0.2 mol% RuPHOX-Ru as the catalyst and 0.2 equiv <sup>t</sup>BuONa as the base in EtOH under 2 bar H<sub>2</sub> pressure at room temperature for 2 h.

**Table S2. Base screening**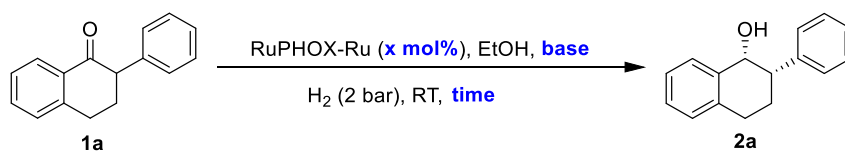

| entry               | base (equiv)                    | conv (%) | ee (%) | dr    |
|---------------------|---------------------------------|----------|--------|-------|
| 1                   | <sup>t</sup> BuOK               | >99      | 99.1   | >20:1 |
| 2                   | <sup>t</sup> BuONa              | >99      | 99.7   | >20:1 |
| 3                   | <sup>t</sup> BuOLi              | >99      | 99     | >20:1 |
| 4                   | DBU                             | 71       | 77     | 6:1   |
| 5                   | KOH                             | >99      | 98     | >20:1 |
| 6                   | NaOH                            | >99      | 98     | >20:1 |
| 7                   | Na <sub>2</sub> CO <sub>3</sub> | >99      | 95     | >20:1 |
| 8                   | K <sub>2</sub> CO <sub>3</sub>  | >99      | 94     | >20:1 |
| 9 <sup>b</sup>      | <sup>t</sup> BuONa              | >99      | 99.3   | >20:1 |
| 10 <sup>c</sup>     | <sup>t</sup> BuONa              | >99      | 99.3   | >20:1 |
| 11 <sup>c,d</sup>   | <sup>t</sup> BuONa              | >99      | 99.1   | >20:1 |
| 12 <sup>c,e</sup>   | <sup>t</sup> BuONa              | >99      | 99.1   | >20:1 |
| 13 <sup>c,e,f</sup> | <sup>t</sup> BuONa              | >99      | 99.1   | >20:1 |
| 14 <sup>c,e,g</sup> | <sup>t</sup> BuONa              | >99      | 99.1   | >20:1 |
| 15 <sup>c,e,h</sup> | <sup>t</sup> BuONa              | >99      | 99.1   | >20:1 |
| 16 <sup>c,e,i</sup> | <sup>t</sup> BuONa              | 90       | 99.1   | >20:1 |

<sup>a</sup> Reaction conditions: **1a** (0.15 mmol), (*S,S*)-RuPHOX-Ru (1.0 mol%) and base (1.0 equiv) in a EtOH (1.5 mL) under 2 bar H<sub>2</sub> at RT for 24 h. <sup>b</sup> Using 0.5 equiv of base. <sup>c</sup> Using 0.2 equiv of base. <sup>d</sup> Using 0.5 mol% of RuPHOX-Ru. <sup>e</sup> Using 0.2 mol% of RuPHOX-Ru. <sup>f</sup> The reactions were carried out over 12 h. <sup>g</sup> The reactions were carried out over 6 h. <sup>h</sup> The reactions were carried out over 2 h. <sup>i</sup> The reactions were carried out over 1 h.

### 3.3 Control experiment

In order to further confirm whether or not transfer hydrogenation occurs in the reaction, we conducted the asymmetric hydrogenation of **1a** under the optimal reaction conditions in the absence of H<sub>2</sub> (Table S3). It was found that almost no transfer hydrogenation occurred within 8 h, and only 12% conversion has been obtained even after 48 h; the hydrogenated product **2a** was obtained with very poor stereoselectivity. The results indicated that asymmetric transfer hydrogenation is negligible during the reaction and H<sub>2</sub> is the hydrogen source for efficient asymmetric hydrogenation.

**Table S3. Asymmetric hydrogenation of 1a in the absence of H<sub>2</sub>**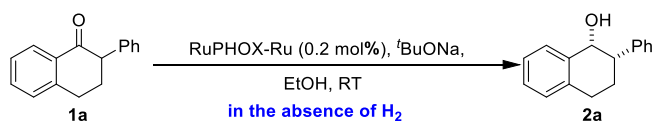

| reaction time / h     | ~8 | 12 | 24 | 48                     |
|-----------------------|----|----|----|------------------------|
| conv of <b>1a</b> / % | ND | 3  | 6  | 12 (40% ee, 1.25:1 dr) |

### 3.4 Substrate scope

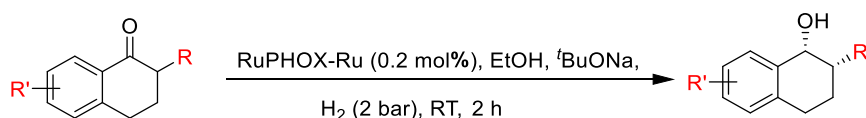

**General Procedure:** The substrate **1a** (0.3 mmol), (*S,S*)-RuPHOX-Ru (1.04 mg, 0.2 mol%) and *t*BuONa (0.2 equiv) were placed in a 5.0 mL tube equipped with a magnetic stirrer bar, which was then put into an autoclave. The pre-prepared solution of catalyst was added under a nitrogen atmosphere. After purging with hydrogen three times, the hydrogen pressure was finally pressurized to 2 bar. The reaction mixture was vigorously stirred at room temperature for 2 h. The conversion of the product and dr value were determined by  $^1\text{H}$  NMR spectroscopic analysis of the crude reaction mixture and the yield was calculated after isolation by flash chromatography (PE/EtOAc = 10/1). The ee value was determined by chiral HPLC using Chiral column IA, IB-3, IE, OJ-H, OD-H, AD-H or OX columns with *n*-hexane/*i*-PrOH as eluent.

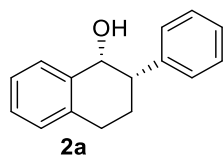

**(1*R*,2*S*)-2-Phenyl-1,2,3,4-tetrahydronaphthalen-1-ol (2a):**<sup>[2]</sup> White solid (98%, 99.1% ee, >20:1 dr).  $^1\text{H}$  NMR (400 MHz,  $\text{CDCl}_3$ )  $\delta$  7.38–7.16 (m, 9H), 4.74 (t,  $J = 3.6\text{ Hz}$ , 1H), 3.08 (dt,  $J = 12.9\text{ Hz}$ , 2.6 Hz, 1H), 3.04–2.98 (m, 1H), 2.93–2.85 (m, 1H), 2.43–2.38 (m, 1H), 1.96–1.88 (m, 1H), 1.62 (d,  $J = 4.0\text{ Hz}$ , 1H).  $[\alpha]_{\text{D}}^{25} = +162.00$  ( $c$  0.30,  $\text{CH}_2\text{Cl}_2$ ). HPLC (Chiralpak IA, *n*-hexane/*i*-PrOH = 95/5, UV = 220 nm, flow rate = 1.0 mL/min), 25 °C,  $t_{\text{major}} = 12.425\text{ min}$ ,  $t_{\text{minor}} = 25.540\text{ min}$ .

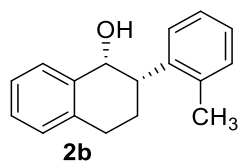

**(1*R*,2*S*)-2-(2-tolyl)-1,2,3,4-tetrahydronaphthalen-1-ol (2b):**<sup>[2]</sup> White solid (98%, 99% ee, >20:1 dr).  $^1\text{H}$  NMR (400 MHz,  $\text{CDCl}_3$ )  $\delta$  7.31–7.07 (m, 8H), 4.73 (d,  $J = 4.0\text{ Hz}$ , 1H), 3.05–2.97 (m, 2H), 2.92–2.84 (m, 1H), 2.44–2.33 (m, 4H), 1.93–1.89 (m, 1H), 1.66 (brs, 1H).  $[\alpha]_{\text{D}}^{25} = +171.33$  ( $c$  0.30,  $\text{CH}_2\text{Cl}_2$ ). HPLC (Chiralpak IC-3, *n*-hexane/*i*-PrOH = 99/1, UV = 220 nm, flow rate = 0.5 mL/min), 25 °C,  $t_{\text{major}} = 33.738\text{ min}$ ,  $t_{\text{minor}} = 45.440\text{ min}$ .

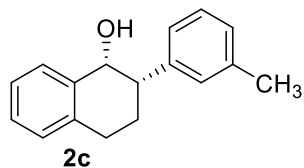

**(1*R*,2*S*)-2-(3-tolyl)-1,2,3,4-tetrahydronaphthalen-1-ol (2c):** White solid (96%, 99.3% ee, >20:1 dr). Mp: 77–78 °C.  $^1\text{H}$  NMR (400 MHz,  $\text{CDCl}_3$ )  $\delta$  7.32–7.15 (m, 8H), 4.70 (d,  $J = 2.0\text{ Hz}$ , 1H), 3.30

(dt,  $J = 12.8, 2.4$  Hz, 1H), 3.05–2.99 (m, 1H), 2.96–2.87 (m, 1H), 2.54–2.43 (m, 1H), 2.35 (s, 3H), 1.84–1.79 (m, 1H), 1.67 (brs, 1H).  $^{13}\text{C}$  NMR (100 MHz,  $\text{CDCl}_3$ )  $\delta$  140.5, 137.8, 136.9, 136.0, 130.8, 130.6, 129.2, 128.2, 127.9, 126.7, 126.3, 126.2, 68.9, 42.1, 30.2, 22.2, 19.6. IR (KBr) ( $\text{v}/\text{cm}^{-1}$ ): 3801, 3734, 2924, 1649, 1463, 1084, 764.  $[\alpha]_{\text{D}}^{25} = +192.73$  ( $c$  0.22,  $\text{CH}_2\text{Cl}_2$ ). HRMS (ESI):  $m/z$  for  $\text{C}_{17}\text{H}_{18}\text{ONa}$   $[\text{M}+\text{Na}]^+$  calcd 261.1255, found 261.1259. HPLC (Chiralpak IC-3,  $n$ -hexane/ $i$ -PrOH = 95/5, UV = 220 nm, flow rate = 0.8 mL/min), 25 °C,  $t_{\text{major}} = 10.840$  min,  $t_{\text{minor}} = 14.518$  min.

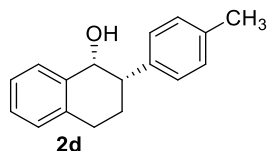

**(1R,2S)-2-(4-tolyl)-1,2,3,4-tetrahydronaphthalen-1-ol (2d):**<sup>[2]</sup> Colorless oil (95%, 99% ee, >20:1 dr).  $^1\text{H}$  NMR (400 MHz,  $\text{CDCl}_3$ )  $\delta$  7.29 (d,  $J = 8.0$  Hz, 1H), 7.25–7.15 (m, 7H), 4.71 (d,  $J = 2.0$  Hz, 1H), 3.06–2.96 (m, 2H), 2.92–2.83 (m, 1H), 2.43–2.32 (m, 4H), 1.92–1.87 (m, 1H), 1.64 (s, 1H).  $[\alpha]_{\text{D}}^{25} = +150.31$  ( $c$  0.64,  $\text{CH}_2\text{Cl}_2$ ). HPLC (Chiralpak IC,  $n$ -hexane/ $i$ -PrOH = 99/1, UV = 220 nm, flow rate = 0.5 mL/min), 25 °C,  $t_{\text{major}} = 39.550$  min,  $t_{\text{minor}} = 51.361$  min.

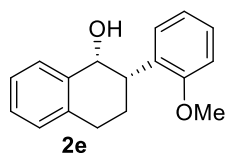

**(1R,2S)-2-(2-Methoxyphenyl)-1,2,3,4-tetrahydronaphthalen-1-ol (2e):**<sup>[9]</sup> Colorless oil. (96%, 93% ee, >20:1 dr).  $^1\text{H}$  NMR (400 MHz,  $\text{CDCl}_3$ )  $\delta$  7.31 (d,  $J = 6.4$  Hz, 1H), 7.29–7.12 (m, 5H), 7.00–6.96 (m, 1H), 6.91–6.84 (m, 1H), 4.83 (d,  $J = 3.2$  Hz, 1H), 3.79 (s, 3H), 3.57–3.52 (m, 1H), 3.05–2.95 (m, 1H), 3.02–2.97 (m, 1H), 2.46–2.36 (m, 1H), 1.82–1.73 (m, 1H), 1.63 (s, 1H).  $^{13}\text{C}$  NMR (100 MHz,  $\text{CDCl}_3$ )  $\delta$  157.1, 138.1, 136.9, 130.8, 130.6, 129.1, 128.7, 128.0, 127.8, 126.1, 120.7, 110.2, 69.0, 55.3, 39.1, 30.1, 21.4.  $[\alpha]_{\text{D}}^{25} = +179.77$  ( $c$  0.88,  $\text{CH}_2\text{Cl}_2$ ). HPLC (Chiralpak IB-3,  $n$ -hexane/ $i$ -PrOH = 95/5, UV = 220 nm, flow rate = 1.0 mL/min), 25 °C,  $t_{\text{major}} = 10.716$  min,  $t_{\text{minor}} = 14.971$  min.

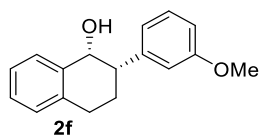

**(1R,2S)-2-(3-Methoxyphenyl)-1,2,3,4-tetrahydronaphthalen-1-ol (2f):**<sup>[2]</sup> White solid (97%, 99% ee, >20:1 dr).  $^1\text{H}$  NMR (400 MHz,  $\text{CDCl}_3$ )  $\delta$  7.35–7.18 (m, 5H), 6.95–6.90 (m, 2H), 6.84–6.82 (m, 1H), 4.78 (s, 1H), 3.82 (s, 3H), 3.10–3.00 (m, 2H), 2.95–2.87 (m, 1H), 2.41 (ddd,  $J = 24.0, 12.0, 4.0$  Hz, 1H), 1.97–1.93 (m, 1H), 1.65 (brs, 1H).  $[\alpha]_{\text{D}}^{25} = +141.46$  ( $c$  0.82,  $\text{CH}_2\text{Cl}_2$ ). HPLC (Chiralpak IA,  $n$ -hexane/ $i$ -PrOH = 95/5, UV = 220 nm, flow rate = 1.0 mL/min), 25 °C,  $t_{\text{major}} = 17.737$  min,  $t_{\text{minor}} = 29.818$  min.

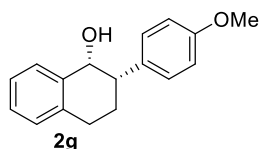

**(1R,2S)-2-(4-Methoxyphenyl)-1,2,3,4-tetrahydronaphthalen-1-ol (2g):**<sup>[21]</sup> White solid (96%, 98% ee, >20:1 dr). <sup>1</sup>H NMR (400 MHz, CDCl<sub>3</sub>)  $\delta$  7.34 (d,  $J$  = 4.0 Hz, 1H), 7.28–7.19 (m, 5H), 6.94 (d,  $J$  = 8.0 Hz, 2H), 4.74 (s, 1H), 3.83 (s, 3H), 3.08–3.01 (m, 2H), 2.96–2.88 (m, 1H), 2.40 (ddd,  $J$  = 20.0, 12.0, 4.0 Hz, 1H), 1.94–1.91 (m, 1H), 1.68 (brs, 1H). [ $\alpha$ ]<sub>D</sub><sup>25</sup> = +122.40 ( $c$  0.58, CH<sub>2</sub>Cl<sub>2</sub>). HPLC (Chiralpak IC-3, *n*-hexane/*i*-PrOH = 95/5, UV = 220 nm, flow rate = 1.0 mL/min), 25 °C,  $t_{\text{major}}$  = 27.139 min,  $t_{\text{minor}}$  = 35.454 min.

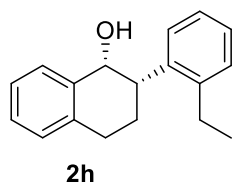

**(1R,2S)-2-(2-Ethylphenyl)-1,2,3,4-tetrahydronaphthalen-1-ol (2h):** Yellow oil (conv. 90%, 98% ee, >20:1 dr). <sup>1</sup>H NMR (400 MHz, CDCl<sub>3</sub>)  $\delta$  7.37–7.33 (m, 2H), 7.29–7.30 (m, 6H), 4.72 (d,  $J$  = 3.2 Hz, 1H), 3.37 (dt,  $J$  = 12.8, 2.8 Hz, 1H), 3.06 (ddd,  $J$  = 17.1, 5.5, 2.2 Hz, 1H), 2.99–2.90 (m, 1H), 2.82–2.60 (m, 2H), 2.53 (qd,  $J$  = 12.6, 5.5 Hz, 1H), 1.88–1.79 (m, 1H), 1.63 (s, 1H), 1.22 (t,  $J$  = 7.6 Hz, 3H). <sup>13</sup>C NMR (100 MHz, CDCl<sub>3</sub>)  $\delta$  142.0, 139.7, 137.7, 136.8, 130.6, 129.1, 128.9, 128.1, 128.0, 126.9, 126.14, 126.12, 69.9, 41.2, 30.2, 25.4, 22.4, 15.8. IR (KBr) ( $\nu/\text{cm}^{-1}$ ): 2930, 2361, 1506, 1489, 1457, 957, 771. HRMS (ESI):  $m/z$  for C<sub>18</sub>H<sub>20</sub>ONa [M+Na]<sup>+</sup> calcd 275.1412, found 275.1410. [ $\alpha$ ]<sub>D</sub><sup>20</sup> = +130.00 ( $c$  0.20, CH<sub>2</sub>Cl<sub>2</sub>). HPLC (Chiralpak IA, *n*-hexane/*i*-PrOH = 95/5, UV = 220 nm, flow rate = 1.0 mL/min), 25 °C,  $t_{\text{major}}$  = 10.487 min,  $t_{\text{minor}}$  = 17.084 min.

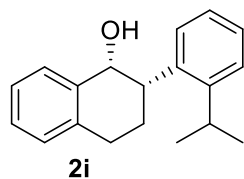

**(1R,2S)-2-(2-Isopropylphenyl)-1,2,3,4-tetrahydronaphthalen-1-ol (2i):** Yellow oil (96%, 97% ee, >20:1 dr). <sup>1</sup>H NMR (400 MHz, CDCl<sub>3</sub>)  $\delta$  7.42–7.30 (m, 3H), 7.30–7.15 (m, 5H), 4.68 (d,  $J$  = 4.0 Hz, 1H), 3.44 (dt,  $J$  = 12.8, 2.4 Hz, 1H), 3.26–3.19 (m, 1H), 3.05 (ddd,  $J$  = 17.0, 5.5, 2.1 Hz, 1H), 2.98–2.90 (m, 1H), 2.52 (qd,  $J$  = 12.6, 5.5 Hz, 1H), 1.85–1.80 (m, 1H), 1.64 (s, 1H), 1.30 (d,  $J$  = 6.8 Hz, 3H), 1.19 (d,  $J$  = 6.8 Hz, 3H). <sup>13</sup>C NMR (100 MHz, CDCl<sub>3</sub>)  $\delta$  146.8, 138.7, 137.7, 136.9, 130.7, 129.2, 128.2, 127.9, 127.0, 126.5, 125.9, 125.7, 70.4, 40.9, 30.1, 28.1, 25.0, 23.7, 22.5. IR (KBr) ( $\nu/\text{cm}^{-1}$ ): 2962, 2868, 1603, 1489, 1383, 1080, 773, 757. HRMS (ESI):  $m/z$  for C<sub>19</sub>H<sub>22</sub>ONa [M+Na]<sup>+</sup> calcd 289.1568, found 289.1566. [ $\alpha$ ]<sub>D</sub><sup>20</sup> = +164.12 ( $c$  0.68, CH<sub>2</sub>Cl<sub>2</sub>). HPLC (Chiralpak IA, *n*-hexane/*i*-PrOH = 95/5, UV = 220 nm, flow rate = 1.0 mL/min), 25 °C,  $t_{\text{major}}$  = 9.008 min,  $t_{\text{minor}}$  = 16.204 min.

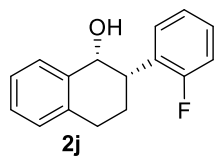

**(1R,2S)-2-(2-Fluorophenyl)-1,2,3,4-tetrahydronaphthalen-1-ol (2j):** White solid (96%, 96% ee, >20:1 dr). Mp: 53–54 °C. <sup>1</sup>H NMR (400 MHz, CDCl<sub>3</sub>) δ 7.36–7.12 (m, 7H), 7.08–7.03 (m, 1H), 4.80 (d, *J* = 3.2 Hz, 1H), 3.45 (dt, *J* = 13.2, 2.8 Hz, 1H), 3.01 (ddd, *J* = 17.2, 6.0, 2.4 Hz, 1H), 2.96–2.87 (m, 1H), 2.47–2.36 (m, 1H), 1.88–1.82 (m, 1H), 1.63 (d, *J* = 8.4 Hz, 1H). <sup>13</sup>C NMR (100 MHz, CDCl<sub>3</sub>) δ 160.9 (d, *J* = 243.5 Hz), 137.8, 136.5, 130.6, 129.7 (dd, *J* = 4.3, 8.9 Hz), 129.2, 128.3, 128.2 (d, *J* = 8.3 Hz), 126.3, 124.2 (d, *J* = 3.4 Hz), 115.3 (d, *J* = 22.5 Hz), 69.7, 38.7 (d, *J* = 1.6 Hz), 29.7, 21.2. <sup>19</sup>F NMR (376 MHz, CDCl<sub>3</sub>) δ –118.4. IR (KBr) (ν/cm<sup>-1</sup>): 3754, 3651, 3307, 2928, 1487, 1192, 1092, 959, 736. HRMS (ESI): *m/z* for C<sub>16</sub>H<sub>14</sub>F [M–OH]<sup>+</sup> calcd 225.1080, found 225.1086. [α]<sub>D</sub><sup>25</sup> = +146.40 (*c* 0.30, CH<sub>2</sub>Cl<sub>2</sub>). HPLC (Chiralcel OJ-H, *n*-hexane/*i*-PrOH = 95/5, UV = 220 nm, flow rate = 2.0 mL/min), 25 °C, *t*<sub>minor</sub> = 8.673 min, *t*<sub>major</sub> = 13.282 min.

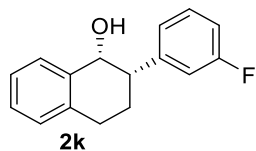

**(1R,2S)-2-(3-Fluorophenyl)-1,2,3,4-tetrahydronaphthalen-1-ol (2k):** White solid (97%, 99.6% ee, >20:1 dr). Mp: 86–87 °C. <sup>1</sup>H NMR (400 MHz, CDCl<sub>3</sub>) δ 7.36–7.19 (m, 5H), 7.11–6.96 (m, 3H), 4.71 (s, 1H), 3.08–2.99 (m, 2H), 2.95–2.87 (m, 1H), 2.35 (ddd, *J* = 20.0, 12.0, 4.0 Hz, 1H), 1.94–1.90 (m, 1H), 1.81 (s, 1H). <sup>13</sup>C NMR (100 MHz, CDCl<sub>3</sub>) δ 163.1 (d, *J* = 244.2 Hz), 145.6 (d, *J* = 6.9 Hz), 137.6 (d, *J* = 106.7 Hz), 130.5, 130.0 (d, *J* = 8.2 Hz), 129.2, 128.4, 126.4, 123.9 (d, *J* = 2.9 Hz), 115.3 (d, *J* = 21.1 Hz), 113.6 (d, *J* = 20.9 Hz), 71.2, 45.9 (d, *J* = 1.7 Hz), 29.6, 21.7. <sup>19</sup>F NMR (376 MHz, CDCl<sub>3</sub>) δ –113.1. IR (KBr) (ν/cm<sup>-1</sup>): 3750, 3674, 2928, 1600, 1456, 1269, 1050, 772. HRMS (ESI): *m/z* for C<sub>16</sub>H<sub>15</sub>FONa [M+Na]<sup>+</sup> calcd 265.1005, found 265.1015. [α]<sub>D</sub><sup>25</sup> = +161.20 (*c* 0.20, CH<sub>2</sub>Cl<sub>2</sub>). HPLC (Chiralcel AD-H, *n*-hexane/*i*-PrOH = 95/5, UV = 220 nm, flow rate = 1.0 mL/min), 25 °C, *t*<sub>major</sub> = 17.274 min, *t*<sub>minor</sub> = 26.296 min.

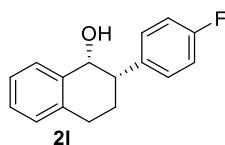

**(1R,2S)-2-(4-Fluorophenyl)-1,2,3,4-tetrahydronaphthalen-1-ol (2l):**<sup>[21]</sup> White solid (96%, 99% ee, >20:1 dr). Mp: 99–100 °C. <sup>1</sup>H NMR (400 MHz, CDCl<sub>3</sub>) δ 7.37–7.17 (m, 6H), 7.10 (t, *J* = 8.0 Hz, 2H), 4.75 (s, 1H), 3.05–3.00 (m, 1H), 2.97–2.96 (m, 1H), 2.89–2.84 (m, 1H), 2.33 (ddd, *J* = 20.0, 12.0, 4.0 Hz, 1H), 1.90–1.85 (m, 1H), 1.71 (s, 1H). [α]<sub>D</sub><sup>25</sup> = +156.93 (*c* 0.30, CH<sub>2</sub>Cl<sub>2</sub>). HPLC (Chiralcel OJ-H, *n*-hexane/*i*-PrOH = 95/5, UV = 220 nm, flow rate = 2.0 mL/min), 25 °C, *t*<sub>minor</sub> = 17.275 min, *t*<sub>major</sub> = 32.154 min.

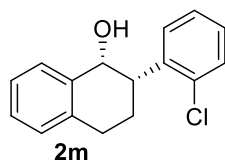

**(1R,2S)-2-(2-Chlorophenyl)-1,2,3,4-tetrahydronaphthalen-1-ol (2m):** White solid (97%, 95% ee, >20:1 dr). Mp: 53–56 °C. <sup>1</sup>H NMR (400 MHz, CDCl<sub>3</sub>) δ 7.40 (dd, *J* = 8.0, 1.6 Hz, 1H), 7.35–7.33 (m, 1H), 7.31–7.15 (m, 6H), 4.86 (d, *J* = 3.2 Hz, 1H), 3.56 (dt, *J* = 13.0, 2.8 Hz, 1H), 3.07–2.87 (m, 2H), 2.42 (qd, *J* = 12.5, 5.8 Hz, 1H), 1.84–1.78 (m, 1H), 1.62 (s, 1H). <sup>13</sup>C NMR (100 MHz, CDCl<sub>3</sub>) δ 139.8, 137.8, 136.5, 134.0, 130.6, 129.8, 129.6, 129.2, 128.2, 127.9, 126.8, 126.2, 68.5, 42.5, 29.9, 21.7. IR (KBr) (v/cm<sup>-1</sup>): 2930, 1490, 1474, 1057, 958, 703. HRMS (ESI): *m/z* for C<sub>16</sub>H<sub>15</sub>ONaCl [M+Na]<sup>+</sup> calcd 281.0709, found 281.0705. [α]<sub>D</sub><sup>20</sup> = +195.83 (*c* 0.24, CH<sub>2</sub>Cl<sub>2</sub>). HPLC (Chiralpak IA, *n*-hexane/*i*-PrOH = 99/1, UV = 220 nm, flow rate = 0.5 mL/min), 25 °C, *t*<sub>major</sub> = 61.153 min, *t*<sub>minor</sub> = 174.827 min.

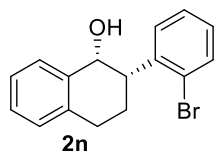

**(1R,2S)-2-(2-Bromophenyl)-1,2,3,4-tetrahydronaphthalen-1-ol (2n):** White solid (97%, 86% ee, >20:1 dr). Mp: 51–52 °C. <sup>1</sup>H NMR (400 MHz, CDCl<sub>3</sub>) δ 7.67–7.60 (m, 1H), 7.44–7.34 (m, 3H), 7.32–7.20 (m, 3H), 7.19–7.13 (m, 1H), 4.96 (d, *J* = 3.2 Hz, 1H), 3.58 (dt, *J* = 13.0, 2.7 Hz, 1H), 3.18–2.92 (m, 2H), 2.52 (qd, *J* = 12.5, 5.7 Hz, 1H), 1.94–1.85 (m, 1H). <sup>13</sup>C NMR (100 MHz, CDCl<sub>3</sub>) δ 141.3, 137.7, 136.6, 132.9, 130.6, 130.0, 129.2, 128.3, 128.2, 127.5, 126.3, 124.9, 68.6, 45.0, 29.9, 22.0. HRMS (ESI): *m/z* for C<sub>16</sub>H<sub>15</sub>BrONa [M+Na]<sup>+</sup> calcd 325.0204, found 325.0204. [α]<sub>D</sub><sup>25</sup> = +169.20 (*c* 0.20, CH<sub>2</sub>Cl<sub>2</sub>). HPLC (Chiralcel OZ-H, *n*-hexane/*i*-PrOH = 99/1, UV = 220 nm, flow rate = 1.0 mL/min), 25 °C, *t*<sub>major</sub> = 20.678 min, *t*<sub>minor</sub> = 34.755 min.

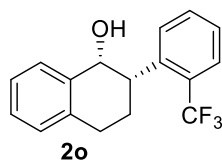

**(1R,2S)-2-(2-(Trifluoromethyl)phenyl)-1,2,3,4-tetrahydronaphthalen-1-ol (2o):** Pale yellow oil (conv. 70%, 90% ee, >20:1 dr). <sup>1</sup>H NMR (400 MHz, CDCl<sub>3</sub>) δ 7.70 (d, *J* = 8.0 Hz, 1H), 7.58 (t, *J* = 7.6 Hz, 1H), 7.45–7.37 (m, 2H), 7.31–7.27 (m, 2H), 7.22–7.16 (m, 1H), 7.10–7.08 (m, 1H), 4.42 (d, *J* = 2.8 Hz, 1H), 3.38 (d, *J* = 12.8 Hz, 1H), 2.91 (dd, *J* = 9.0, 3.7 Hz, 2H), 2.24–2.13 (m, 1H), 1.72–1.62 (m, 1H). <sup>13</sup>C NMR (100 MHz, CDCl<sub>3</sub>) δ 141.9, 137.2 (d, *J* = 183.0 Hz), 134.3, 131.4, 130.8 (d, *J* = 23.6 Hz), 129.2, 128.6, 128.3, 128.2, 126.5, 126.1, 125.8 (d, *J* = 6.0 Hz), 123.4, 69.7, 41.4, 30.0, 22.9. <sup>19</sup>F NMR (376 MHz, CDCl<sub>3</sub>) δ –58.1. IR (KBr) (v/cm<sup>-1</sup>): 2933, 1607, 1491, 1347, 1117, 1035,

768. HRMS (ESI):  $m/z$  for  $C_{17}H_{15}ONaF_3$   $[M+Na]^+$  calcd 315.0973, found 315.0965.  $[\alpha]_D^{20} = +85.00$  ( $c$  0.24,  $CH_2Cl_2$ ). HPLC (Chiralpak IA,  $n$ -hexane/ $i$ -PrOH = 95/5, UV = 220 nm, flow rate = 1.0 mL/min), 25 °C,  $t_{major} = 11.185$  min,  $t_{minor} = 20.465$  min.

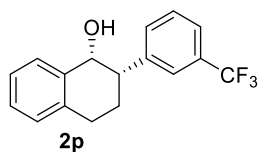

**(1R,2S)-2-(3-(Trifluoromethyl)phenyl)-1,2,3,4-tetrahydronaphthalen-1-ol (2p):** White solid (97%, 99.5% ee, >20:1 dr). Mp: 96–97°C.  $^1H$  NMR (400 MHz,  $CDCl_3$ )  $\delta$  7.59 (s, 1H), 7.56–7.45 (m, 3H), 7.32 (dd,  $J = 7.4, 1.7$  Hz, 1H), 7.29–7.18 (m, 3H), 4.79 (d,  $J = 2.8$  Hz, 1H), 3.13 (dt,  $J = 12.8, 2.8$  Hz, 1H), 3.05 (ddd,  $J = 17.2, 5.7, 2.1$  Hz, 1H), 2.93 (ddd,  $J = 17.4, 12.0, 5.8$  Hz, 1H), 2.46 (qd,  $J = 12.7, 5.7$  Hz, 1H), 2.00–1.90 (m, 1H).  $^{13}C$  NMR (100 MHz,  $CDCl_3$ )  $\delta$  143.9, 137.0 (d,  $J = 152.0$  Hz), 131.7, 130.9, 130.5, 130.3, 129.2, 128.5 (d,  $J = 34.0$  Hz), 126.3, 125.1 (q,  $J = 3.9$  Hz), 125.7, 123.5 (q,  $J = 3.9$  Hz), 123.0, 71.0, 45.9, 29.5, 21.6.  $^{19}F$  NMR (376 MHz,  $CDCl_3$ )  $\delta$  –62.2; IR (KBr) ( $\nu/cm^{-1}$ ): 3732, 3566, 2928, 1457, 1161, 823. IR (KBr) ( $\nu/cm^{-1}$ ): 3754, 3651, 3307, 2928, 1487, 1192, 1092, 959, 736. HRMS (ESI):  $m/z$  for  $C_{17}H_{15}F_3ONa$   $[M+Na]^+$  calcd 315.0973, found 315.0988.  $[\alpha]_D^{25} = +139.83$  ( $c$  0.24,  $CH_2Cl_2$ ). HPLC (Chiralpak IA,  $n$ -hexane/ $i$ -PrOH = 95/5, UV = 220 nm, flow rate = 1.0 mL/min), 25 °C,  $t_{major} = 10.302$  min,  $t_{minor} = 17.739$  min.

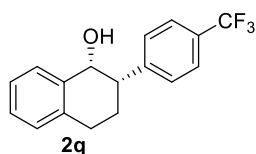

**(1R,2S)-2-(4-(Trifluoromethyl)phenyl)-1,2,3,4-tetrahydronaphthalen-1-ol (2q):** White solid (96%, 99.5% ee, >20:1 dr). Mp: 112–113 °C.  $^1H$  NMR (400 MHz,  $CDCl_3$ )  $\delta$  7.61 (d,  $J = 8.0$  Hz, 2H), 7.41 (d,  $J = 7.9$  Hz, 2H), 7.32–7.14 (m, 4H), 4.71 (d,  $J = 2.8$  Hz, 1H), 3.10 (dt,  $J = 13.0, 3.0$  Hz, 1H), 3.01 (ddd,  $J = 17.2, 5.8, 2.2$  Hz, 1H), 2.90 (ddd,  $J = 17.3, 12.0, 5.8$  Hz, 1H), 2.38 (qd,  $J = 12.6, 5.7$  Hz, 1H), 1.92 (ddd,  $J = 12.7, 5.8, 2.7$  Hz, 1H), 1.68 (s, 1H).  $^{13}C$  NMR (100 MHz,  $CDCl_3$ )  $\delta$  147.0, 137.5 (d,  $J = 121.4$  Hz), 130.3, 129.2, 129.0 (d,  $J = 32.1$  Hz), 128.7, 128.4, 126.3, 125.3 (q,  $J = 3.7$  Hz), 123.0, 71.0, 45.9, 29.5, 21.6.  $^{19}F$  NMR (376 MHz,  $CDCl_3$ )  $\delta$  –62.4. IR (KBr) ( $\nu/cm^{-1}$ ): 3766, 3566, 2922, 1325, 1119, 1068. HRMS (ESI):  $m/z$  for  $C_{17}H_{15}F_3ONa$   $[M+Na]^+$  calcd 315.0973, found 315.0978.  $[\alpha]_D^{25} = +135.33$  ( $c$  0.30,  $CH_2Cl_2$ ). HPLC (Chiralpak IA,  $n$ -hexane/ $i$ -PrOH = 95/5, UV = 220 nm, flow rate = 1.0 mL/min), 25 °C,  $t_{major} = 11.927$  min,  $t_{minor} = 16.645$  min.

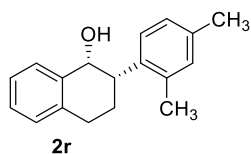

**(1R,2S)-2-(2,4-Dimethylphenyl)-1,2,3,4-tetrahydronaphthalen-1-ol (2r):** White solid (98%, 99.1% ee, >20:1 dr). Mp: 86–87 °C.  $^1H$  NMR (400 MHz,  $CDCl_3$ )  $\delta$  7.22 (dd,  $J = 7.2, 2.0$  Hz, 1H), 7.17–7.04 (m, 3H), 6.85 (s, 2H), 6.82 (s, 1H), 4.64 (s, 1H), 2.96–2.86 (m, 2H), 2.83–2.74 (m, 1H),



2.35–2.27 (m, 1H), 2.24 (s, 6H), 1.85–1.78 (m, 1H), 1.55 (s, 1H).  $^{13}\text{C}$  NMR (100 MHz,  $\text{CDCl}_3$ )  $\delta$  142.6, 138.2, 137.8, 136.8, 130.6, 129.1, 128.6, 128.1, 126.2, 126.0, 71.4, 45.9, 29.9, 21.53, 21.52. IR (KBr) ( $\text{v}/\text{cm}^{-1}$ ): 3766, 3566, 2922, 1325, 1119, 1068. IR (KBr) ( $\text{v}/\text{cm}^{-1}$ ): 3736, 3647, 2916, 1692, 1502, 1457. HRMS (ESI):  $m/z$  for  $\text{C}_{18}\text{H}_{20}\text{ONa}$   $[\text{M}+\text{Na}]^+$  calcd 275.1412, found 275.1417.  $[\alpha]_{\text{D}}^{25} = +160.80$  ( $c$  0.30,  $\text{CH}_2\text{Cl}_2$ ). HPLC (Chiralpak IE,  $n$ -hexane/ $i$ -PrOH = 95/5, UV = 220 nm, flow rate = 1.0 mL/min), 25 °C,  $t_{\text{major}} = 9.115$  min,  $t_{\text{minor}} = 18.318$  min.

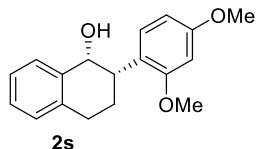

**(1R,2S)-2-(2,4-Dimethoxyphenyl)-1,2,3,4-tetrahydronaphthalen-1-ol (2s):** White solid (97%, >99.9% ee, >20:1 dr). Mp: 82–93 °C.  $^1\text{H}$  NMR (400 MHz,  $\text{CDCl}_3$ )  $\delta$  7.20 (dd,  $J = 7.2, 2.0$  Hz, 1H), 7.16–6.96 (m, 3H), 6.38 (d,  $J = 2.0$  Hz, 2H), 6.27 (t,  $J = 2.4$  Hz, 1H), 4.61 (t,  $J = 2.0$  Hz, 1H), 3.66 (s, 6H), 2.97–2.80 (m, 2H), 2.80–2.71 (m, 1H), 2.28–2.18 (m, 1H), 1.83–1.67 (m, 2H).  $^{13}\text{C}$  NMR (100 MHz,  $\text{CDCl}_3$ )  $\delta$  161.0, 145.2, 137.7, 136.7, 130.5, 129.1, 128.1, 126.2, 106.4, 98.5, 71.3, 55.3, 46.4, 29.7, 21.6. HRMS (ESI):  $m/z$  for  $\text{C}_{18}\text{H}_{20}\text{O}_3\text{Na}$   $[\text{M}+\text{Na}]^+$  calcd 307.1310, found 307.1314.  $[\alpha]_{\text{D}}^{25} = +147.33$  ( $c$  0.30,  $\text{CH}_2\text{Cl}_2$ ). HPLC (Chiralpak IB-3,  $n$ -hexane/ $i$ -PrOH = 95/5, UV = 220 nm, flow rate = 1.0 mL/min), 25 °C,  $t_{\text{major}} = 26.876$  min,  $t_{\text{minor}} = 35.298$  min.

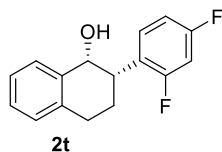

**(1R,2S)-2-(2,4-Difluorophenyl)-1,2,3,4-tetrahydronaphthalen-1-ol (2t):** White solid (96%, 99.4% ee, >20:1 dr). Mp: 100–101 °C.  $^1\text{H}$  NMR (400 MHz,  $\text{CDCl}_3$ )  $\delta$  7.27–7.10 (m, 4H), 6.80–6.72 (m, 2H), 6.67 (dt,  $J = 8.8, 2.4$  Hz, 1H), 4.45 (d,  $J = 2.8$  Hz, 1H), 3.00–2.76 (m, 3H), 2.26 (s, 1H), 2.13–2.03 (m, 1H), 1.80–1.74 (m, 1H).  $^{13}\text{C}$  NMR (100 MHz,  $\text{CDCl}_3$ )  $\delta$  163.0 (dd,  $J = 246.1, 12.8$  Hz), 147.2 (d,  $J = 8.6$  Hz), 137.5, 136.2, 130.5, 129.1, 128.4, 126.4, 111.2 (dd,  $J = 18.1, 6.4$  Hz), 102.2 (d,  $J = 25.2$  Hz), 70.7, 45.9 (d,  $J = 2.0$  Hz), 29.5, 21.5.  $^{19}\text{F}$  NMR (376 MHz,  $\text{CDCl}_3$ )  $\delta$  –110.2. IR (KBr) ( $\text{v}/\text{cm}^{-1}$ ): 3742, 3651, 2934, 1627, 1463, 1123, 981, 851. HRMS (ESI):  $m/z$  for  $\text{C}_{16}\text{H}_{14}\text{F}_2\text{Na}$   $[\text{M}+\text{Na}]^+$  calcd 243.0985, found 243.0991.  $[\alpha]_{\text{D}}^{25} = +145.87$  ( $c$  0.30,  $\text{CH}_2\text{Cl}_2$ ). HPLC (Chiralpak IB-3,  $n$ -hexane/ $i$ -PrOH = 95/5, UV = 220 nm, flow rate = 1.0 mL/min), 25 °C,  $t_{\text{major}} = 10.056$  min,  $t_{\text{minor}} = 12.247$  min.

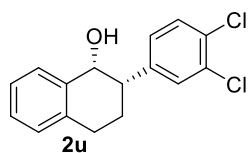

**(1R,2S)-2-(3,4-Dichlorophenyl)-1,2,3,4-tetrahydronaphthalen-1-ol (2u):** White solid (98%, 99.3% ee, >20:1 dr). Mp: 55–56 °C.  $^1\text{H}$  NMR (400 MHz,  $\text{CDCl}_3$ )  $\delta$  7.40–7.32 (m, 2H), 7.29–7.12 (m, 4H),

7.07 (dd,  $J = 8.3, 2.1$  Hz, 1H), 4.53 (d,  $J = 2.8$  Hz, 1H), 2.99–2.77 (m, 3H), 2.16 (qd,  $J = 12.6, 5.9$  Hz, 1H), 1.98 (s, 1H), 1.85–1.71 (m, 1H).  $^{13}\text{C}$  NMR (100 MHz,  $\text{CDCl}_3$ )  $\delta$  143.4, 137.6, 136.3, 132.3, 130.5, 130.4, 130.35, 130.3, 129.2, 128.4, 127.8, 126.4, 70.8, 45.4, 29.5, 21.6; IR (KBr) ( $\text{v}/\text{cm}^{-1}$ ): 3750, 3568, 2928, 1731, 1621, 1456. HRMS (ESI):  $m/z$  for  $\text{C}_{16}\text{H}_{14}\text{Cl}_2\text{ONa}$   $[\text{M}+\text{Na}]^+$  calcd 315.0319, found 315.0328.  $[\alpha]_{\text{D}}^{25} = +106.27$  ( $c$  0.30,  $\text{CH}_2\text{Cl}_2$ ). HPLC (Chiralpak IA,  $n$ -hexane/ $i$ -PrOH = 95/5, UV = 220 nm, flow rate = 1.0 mL/min), 25 °C,  $t_{\text{major}} = 16.034$  min,  $t_{\text{minor}} = 23.345$  min.

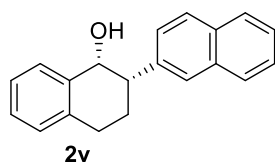

**(1R,2S)-1,2,3,4-Tetrahydro-[2,2'-binaphthalen]-1-ol (2v):** White solid (98%, 99% ee, >20:1 dr). Mp: 121–122 °C.  $^1\text{H}$  NMR (400 MHz,  $\text{CDCl}_3$ )  $\delta$  7.89–7.86 (m, 3H), 7.80 (t,  $J = 1.2$  Hz, 1H), 7.54–7.46 (m, 3H), 7.38 (dd,  $J = 7.2, 1.6$  Hz, 1H), 7.33–7.22 (m, 3H), 4.90 (d,  $J = 3.2$  Hz, 1H), 3.29 (dt,  $J = 12.8, 3.2$  Hz, 1H), 3.11 (ddd,  $J = 17.1, 5.7, 2.2$  Hz, 1H), 2.99 (ddd,  $J = 17.2, 12.0, 5.6$  Hz, 1H), 2.58 (qd,  $J = 12.6, 5.6$  Hz, 1H), 2.12–2.06 (m, 1H), 1.62 (s, 1H).  $^{13}\text{C}$  NMR (100 MHz,  $\text{CDCl}_3$ )  $\delta$  140.2, 137.7, 136.8, 133.6, 132.6, 130.6, 129.2, 128.3, 128.2, 127.9, 127.7, 126.9, 126.6, 126.2, 126.2, 125.7, 71.2, 46.2, 29.8, 21.7. IR (KBr) ( $\text{v}/\text{cm}^{-1}$ ): 3752, 3027, 2922, 1656, 1457, 1036, 817. HRMS (ESI):  $m/z$  for  $\text{C}_{20}\text{H}_{18}\text{ONa}$   $[\text{M}+\text{Na}]^+$  calcd 297.1255, found 297.1264.  $[\alpha]_{\text{D}}^{25} = +155.00$  ( $c$  0.20,  $\text{CH}_2\text{Cl}_2$ ). HPLC (Chiralpak IB-3,  $n$ -hexane/ $i$ -PrOH = 95/5, UV = 220 nm, flow rate = 1.0 mL/min), 25 °C,  $t_{\text{major}} = 22.067$  min,  $t_{\text{minor}} = 25.443$  min.

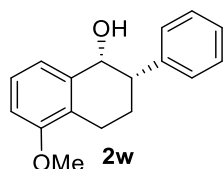

**(1R,2S)-5-Methoxy-2-phenyl-1,2,3,4-tetrahydronaphthalen-1-ol (2w):** Colorless oil (98%, 99.5% ee, >20:1 dr).  $^1\text{H}$  NMR (400 MHz,  $\text{CDCl}_3$ )  $\delta$  7.36–7.19 (m, 5H), 7.11–6.96 (m, 3H), 4.71 (s, 1H), 3.08–3.00 (m, 2H), 2.95–2.87 (m, 1H), 2.40–2.29 (m, 1H), 1.94–1.90 (m, 1H), 1.71 (s, 1H).  $^{13}\text{C}$  NMR (100 MHz,  $\text{CDCl}_3$ )  $\delta$  198.5, 156.8, 139.7, 134.0, 133.1, 128.6, 128.5, 127.1, 127.0, 119.4, 114.3, 55.8, 53.9, 30.4, 22.3. IR (KBr) ( $\text{v}/\text{cm}^{-1}$ ): 3756, 3570, 2932, 1710, 1463, 1256, 1088, 788. HRMS (ESI):  $m/z$  for  $\text{C}_{17}\text{H}_{18}\text{O}_2\text{Na}$   $[\text{M}+\text{Na}]^+$  calcd 277.1204, found 277.1210.  $[\alpha]_{\text{D}}^{25} = +161.22$  ( $c$  0.82,  $\text{CH}_2\text{Cl}_2$ ). HPLC (Chiralpak IE,  $n$ -hexane/ $i$ -PrOH = 95/5, UV = 220 nm, flow rate = 1.0 mL/min), 25 °C,  $t_{\text{major}} = 15.601$  min,  $t_{\text{minor}} = 45.323$  min.

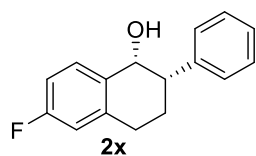

**(1*R*,2*S*)-6-Fluoro-2-phenyl-1,2,3,4-tetrahydronaphthalen-1-ol (2x):** White solid (96%, 97% ee, >20:1 dr). Mp: 69–70 °C; <sup>1</sup>H NMR (400 MHz, CDCl<sub>3</sub>) δ 7.41–7.37 (m, 2H), 7.33–7.24 (m, 4H), 6.94–6.86 (m, 2H), 4.73 (s, 1H), 3.08 (dt, *J* = 12.8, 2.8 Hz, 1H), 3.04–2.89 (m, 1H), 2.93–2.85 (m, 1H), 2.42 (ddd, *J* = 12.0, 8.0, 4.0 Hz, 1H), 1.96–1.91 (m, 1H), 1.64 (s, 1H). <sup>13</sup>C NMR (100 MHz, CDCl<sub>3</sub>) δ 162.4 (d, *J* = 244.8 Hz), 142.3, 139.1 (d, *J* = 7.6 Hz), 133.5 (d, *J* = 2.9 Hz), 132.2 (d, *J* = 8.5 Hz), 128.7, 128.2, 126.9, 115.2 (d, *J* = 21.0 Hz), 113.4 (d, *J* = 21.0 Hz), 70.7, 46.0, 30.0, 21.2. <sup>19</sup>F NMR (376 MHz, CDCl<sub>3</sub>) δ –114.4. IR (KBr) (ν/cm<sup>-1</sup>): 3902, 3720, 3568, 2932, 1611, 1502, 1250, 965. HRMS (ESI): *m/z* for C<sub>16</sub>H<sub>14</sub>F [M-OH]<sup>+</sup> calcd 225.1080, found 225.1087. [α]<sub>D</sub><sup>25</sup> = +158.33 (*c* 0.24, CH<sub>2</sub>Cl<sub>2</sub>). HPLC (Chiralcel AD-H, *n*-hexane/*i*-PrOH = 95/5, UV = 220 nm, flow rate = 1.0 mL/min), 25 °C, *t*<sub>major</sub> = 12.639 min, *t*<sub>minor</sub> = 20.838 min.

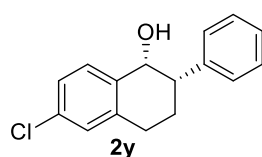

**(1*R*,2*S*)-6-Chloro-2-phenyl-1,2,3,4-tetrahydronaphthalen-1-ol (2y):** White solid (97%, 98% ee, >20:1 dr). Mp: 87–88 °C. <sup>1</sup>H NMR (400 MHz, CDCl<sub>3</sub>) δ 7.42–7.38 (m, 2H), 7.32–7.29 (m, 3H), 7.24–7.19 (m, 3H), 4.65 (s, 1H), 3.06–3.02 (m, 1H), 2.99–2.94 (m, 1H), 2.90–2.82 (m, 1H), 2.34 (ddd, *J* = 20.0, 16.0, 8.0 Hz, 1H), 1.94–1.89 (m, 2H). <sup>13</sup>C NMR (100 MHz, CDCl<sub>3</sub>) δ 142.3, 138.7, 136.2, 133.7, 131.9, 128.8, 128.7, 128.3, 127.0, 126.4, 70.7, 46.0, 30.0, 21.3. IR (KBr) (ν/cm<sup>-1</sup>): 3734, 3560, 2934, 1694, 1629, 1489, 1076, 859. HRMS (ESI): *m/z* for C<sub>16</sub>H<sub>13</sub>Cl [M-OH]<sup>+</sup> calcd 241.0784, found 241.0792. [α]<sub>D</sub><sup>25</sup> = +150.17 (*c* 0.24, CH<sub>2</sub>Cl<sub>2</sub>). HPLC (Chiralcel AD-H, *n*-hexane/*i*-PrOH = 95/5, UV = 220 nm, flow rate = 1.0 mL/min), 25 °C, *t*<sub>major</sub> = 14.543 min, *t*<sub>minor</sub> = 30.996 min.

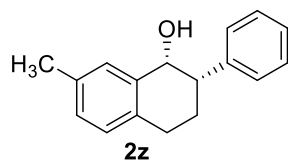

**(1*R*,2*S*)-7-Methyl-2-phenyl-1,2,3,4-tetrahydronaphthalen-1-ol (2z):** White solid (95%, 99% ee, >20:1 dr). Mp: 74–75 °C. <sup>1</sup>H NMR (400 MHz, CDCl<sub>3</sub>) δ 7.39–7.31 (m, 4H), 7.29–7.25 (m, 1H), 7.14 (s, 1H), 7.07 (d, *J* = 1.2 Hz, 2H), 4.72 (d, *J* = 2.0 Hz, 1H), 3.07 (dt, *J* = 13.2, 2.8 Hz, 1H), 2.98 (ddd, *J* = 17.2, 5.6, 2.0 Hz, 1H), 2.90–2.81 (m, 1H), 2.41 (ddd, *J* = 25.2, 12.8, 5.6 Hz, 1H), 2.33 (s, 3H), 1.96–1.89 (m, 1H), 1.58 (s, 1H). <sup>13</sup>C NMR (100 MHz, CDCl<sub>3</sub>) δ 142.8, 137.5, 135.7, 133.7, 130.9, 129.2, 129.1, 128.7, 128.3, 126.9, 71.5, 46.2, 29.4, 21.7, 21.1. IR (KBr) (ν/cm<sup>-1</sup>): 3734, 3655, 2934, 1718, 1631, 1455, 1076, 963. HRMS (ESI): *m/z* for C<sub>17</sub>H<sub>18</sub>ONa [M+Na]<sup>+</sup> calcd 261.1255, found 261.1251. [α]<sub>D</sub><sup>25</sup> = +138.64 (*c* 0.56, CH<sub>2</sub>Cl<sub>2</sub>). HPLC (Chiralpak IA, *n*-hexane/*i*-PrOH = 95/5, UV = 220 nm, flow rate = 1.0 mL/min), 25 °C, *t*<sub>major</sub> = 12.382 min, *t*<sub>minor</sub> = 21.635 min.

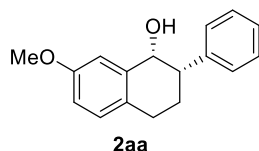

**(1R,2S)-7-Methoxy-2-phenyl-1,2,3,4-tetrahydronaphthalen-1-ol (2aa):** White solid (97%, 99.5% ee, >20:1 dr). Mp: 76–77 °C. <sup>1</sup>H NMR (400 MHz, CDCl<sub>3</sub>) δ 7.42–7.28 (m, 5H), 7.12 (d, *J* = 8.0 Hz, 1H), 6.89–6.85 (m, 2H), 4.72 (s, 1H), 3.81 (s, 3H), 3.09 (dt, *J* = 12.8, 2.8 Hz, 1H), 3.00–2.94 (m, 1H), 2.89–2.81 (m, 1H), 2.45–2.34 (m, 1H), 1.97–1.92 (m, 1H), 1.77 (s, 1H). <sup>13</sup>C NMR (100 MHz, CDCl<sub>3</sub>) δ 158.0, 142.6, 138.7, 130.1, 128.8, 128.7, 128.3, 126.9, 115.0, 114.5, 71.6, 55.4, 46.1, 28.9, 22.0. IR (KBr) (ν/cm<sup>-1</sup>): 3766, 3572, 2938, 1747, 1558, 1451, 1256, 1068, 861. HRMS (ESI): *m/z* for C<sub>17</sub>H<sub>18</sub>O<sub>2</sub>Na [M+Na]<sup>+</sup> calcd 277.1199, found 277.1194. [α]<sub>D</sub><sup>25</sup> = +145.33 (*c* 0.30, CH<sub>2</sub>Cl<sub>2</sub>). HPLC (Chiralpak IA, *n*-hexane/*i*-PrOH = 95/5, UV = 220 nm, flow rate = 1.0 mL/min), 25 °C, *t*<sub>major</sub> = 32.415 min, *t*<sub>minor</sub> = 56.880 min.

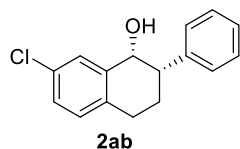

**(1R,2S)-7-Chloro-2-phenyl-1,2,3,4-tetrahydronaphthalen-1-ol (2ab):** White solid (97%, 99.3% ee, >20:1 dr). Mp: 93–94 °C. <sup>1</sup>H NMR (400 MHz, CDCl<sub>3</sub>) δ 7.38–7.34 (m, 2H), 7.28–7.19 (m, 4H), 7.20 (d, *J* = 8.0 Hz, 1H), 7.08 (d, *J* = 8.0 Hz, 1H), 4.63 (s, 1H), 3.04–3.00 (m, 1H), 2.97–2.91 (m, 1H), 2.85–2.76 (m, 1H), 2.33 (ddd, *J* = 28.0, 12.0, 4.0 Hz, 1H), 1.92–1.88 (m, 1H), 1.89 (s, 1H). <sup>13</sup>C NMR (100 MHz, CDCl<sub>3</sub>) δ 142.1, 139.4, 135.2, 131.5, 130.4, 130.3, 128.7, 128.3, 128.2, 127.0, 70.8, 45.8, 30.0, 21.5. IR (KBr) (ν/cm<sup>-1</sup>): 3744, 3568, 2930, 1649, 1461, 1026. HRMS (ESI): *m/z* for C<sub>16</sub>H<sub>15</sub>ClNa [M+Na]<sup>+</sup> calcd 281.0709, found 281.0715. [α]<sub>D</sub><sup>25</sup> = +125.00 (*c* 0.24, CH<sub>2</sub>Cl<sub>2</sub>). HPLC (Chiralcel AD-H, *n*-hexane/*i*-PrOH = 95/5, UV = 220 nm, flow rate = 1.0 mL/min), 25 °C, *t*<sub>major</sub> = 18.916 min, *t*<sub>minor</sub> = 21.155 min.

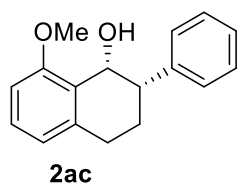

**(1R,2S)-8-Methoxy-2-phenyl-1,2,3,4-tetrahydronaphthalen-1-ol (2ac):**<sup>[2]</sup> White solid (95%, 99% ee, >20:1 dr). <sup>1</sup>H NMR (400 MHz, CDCl<sub>3</sub>) δ 7.44–7.32 (m, 4H), 7.31–7.18 (m, 2H), 6.81 (d, *J* = 7.6 Hz, 1H), 6.73 (d, *J* = 8.4 Hz, 1H), 5.11 (dd, *J* = 3.2, 0.8 Hz, 1H), 3.83 (s, 3H), 3.10–2.83 (m, 3H), 2.44 (qd, *J* = 12.7, 5.4 Hz, 1H), 2.00 (s, 1H), 1.96–1.88 (m, 1H). <sup>13</sup>C NMR (100 MHz, CDCl<sub>3</sub>) δ 157.9, 143.1, 138.2, 128.6, 128.36, 128.31, 127.1, 126.5, 121.5, 107.6, 65.5, 55.5, 45.8, 30.3, 21.3. [α]<sub>D</sub><sup>20</sup> = +142.16 (*c* 0.50, CH<sub>2</sub>Cl<sub>2</sub>). HPLC (Chiralpak IA, *n*-hexane/*i*-PrOH = 95/5, UV = 220 nm, flow rate = 1.0 mL/min), 25 °C, *t*<sub>major</sub> = 14.881 min, *t*<sub>minor</sub> = 21.984 min.

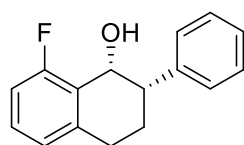

**2ad**

**(1R,2S)-8-Fluoro-2-phenyl-1,2,3,4-tetrahydronaphthalen-1-ol (2ad):** Colorless oil (92%, 98% ee, >20:1 dr). <sup>1</sup>H NMR (400 MHz, CDCl<sub>3</sub>) δ 7.43–7.31 (m, 4H), 7.32–7.24 (m, 1H), 7.23–7.18 (m, 1H), 6.97 (d, *J* = 7.7 Hz, 1H), 6.90 (ddt, *J* = 9.5, 8.3, 1.2 Hz, 1H), 5.08 (d, *J* = 3.6 Hz, 1H), 3.11–2.94 (m, 2H), 2.95–2.82 (m, 1H), 2.46 (qd, *J* = 12.8, 5.4 Hz, 1H), 2.00–1.88 (m, 1H), 1.71 (s, 1H). <sup>13</sup>C NMR (100 MHz, CDCl<sub>3</sub>) δ 161.7 (d, *J* = 245.0 Hz), 142.3, 139.3 (d, *J* = 4.0 Hz), 129.1 (d, *J* = 9.0 Hz), 128.5 (d, *J* = 33.0 Hz), 126.9, 125.5 (d, *J* = 48.0 Hz), 124.6 (d, *J* = 4.0 Hz), 112.7, 112.5, 64.7 (d, *J* = 4.0 Hz), 45.7, 29.8 (d, *J* = 2.0 Hz), 20.9. <sup>19</sup>F NMR (376 MHz, CDCl<sub>3</sub>) δ –120.7. IR (KBr) (v/cm<sup>-1</sup>): 2924, 1583, 1495, 1233, 966, 718, 700. HRMS (ESI): *m/z* for C<sub>16</sub>H<sub>15</sub>ONaF [M+Na]<sup>+</sup> calcd 265.1005, found 265.0999. [α]<sub>D</sub><sup>20</sup> = +166.55 (*c* 0.58, CH<sub>2</sub>Cl<sub>2</sub>). HPLC (Chiralpak IA, *n*-hexane/*i*-PrOH = 99/1, UV = 220 nm, flow rate = 0.5 mL/min), 25 °C, *t*<sub>major</sub> = 42.914 min, *t*<sub>minor</sub> = 83.026 min.

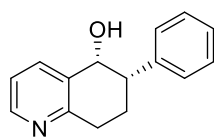

**2ae**

**(5R,6S)-6-Phenyl-5,6,7,8-tetrahydroquinolin-5-ol (2ae):**<sup>[21]</sup> Pale yellow solid (96%, 98% ee, >20:1 dr). <sup>1</sup>H NMR (400 MHz, CDCl<sub>3</sub>) δ 8.40 (d, *J* = 2.4 Hz, 1H), 7.58 (dd, *J* = 7.6, 1.6 Hz, 1H), 7.34–7.30 (m, 2H), 7.28–7.17 (m, 3H), 7.09 (dd, *J* = 7.6, 4.8 Hz, 1H), 4.72 (d, *J* = 2.4 Hz, 1H), 3.17–3.02 (m, 2H), 3.00–2.88 (m, 1H), 2.51–2.40 (m, 1H), 2.15–1.90 (m, 3H). [α]<sub>D</sub><sup>25</sup> = +95.83 (*c* 0.05, CH<sub>2</sub>Cl<sub>2</sub>). HPLC (Chiralpak IB-3, *n*-hexane/*i*-PrOH = 95/5, UV = 220 nm, flow rate = 1.0 mL/min), 25 °C, *t*<sub>major</sub> = 42.093 min, *t*<sub>minor</sub> = 54.537 min.

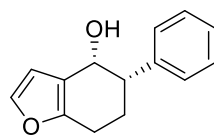

**2af**

**(4R,5S)-5-Phenyl-4,5,6,7-tetrahydrobenzofuran-4-ol (2af):**<sup>[21]</sup> Colorless oil (90%, 95% ee, >20:1 dr). <sup>1</sup>H NMR (400 MHz, CDCl<sub>3</sub>) δ 7.46–7.18 (m, 6H), 6.40 (d, *J* = 1.6 Hz, 1H), 4.68 (d, *J* = 3.2 Hz, 1H), 3.03 (dt, *J* = 13.0, 2.9 Hz, 1H), 2.87–2.82 (m, 1H), 2.68 (ddd, *J* = 16.9, 11.6, 5.8 Hz, 1H), 2.44 (qd, *J* = 12.4, 5.7 Hz, 1H), 1.99–1.94 (m, 1H), 1.46 (s, 1H). <sup>13</sup>C NMR (100 MHz, CDCl<sub>3</sub>) δ 152.8, 142.1, 141.4, 128.7, 128.3, 126.9, 119.3, 109.9, 66.5, 46.7, 23.7, 22.1. [α]<sub>D</sub><sup>20</sup> = +157.27 (*c* 0.22, CH<sub>2</sub>Cl<sub>2</sub>). HPLC (Chiralpak IA, *n*-hexane/*i*-PrOH = 99/1, UV = 220 nm, flow rate = 0.5 mL/min), 25 °C, *t*<sub>major</sub> = 53.347 min, *t*<sub>minor</sub> = 97.326 min.

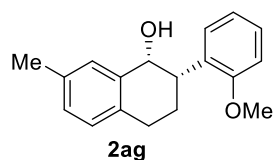

**(1R,2S)-2-(2-Methoxyphenyl)-7-methyl-1,2,3,4-tetrahydronaphthalen-1-ol (2ag):** White solid (98%, 91% ee, >20:1 dr). Mp: 88–89 °C. <sup>1</sup>H NMR (400 MHz, CDCl<sub>3</sub>) δ 7.40–7.36 (m, 1H), 7.37–7.32 (m, 1H), 7.26 (s, 1H), 7.19–7.15 (m, 2H), 7.09 (dt, *J* = 13.6, 1.2 Hz, 1H), 7.00 (dd, *J* = 8.4, 1.2 Hz, 1H), 4.93 (dd, *J* = 2.8, 0.8 Hz, 1H), 3.91 (s, 3H), 3.65 (dt, *J* = 13.2, 2.8 Hz, 1H), 3.12–3.06 (m, 1H), 2.58–2.47 (m, 1H), 2.43 (s, 3H), 1.93–1.87 (m, 1H), 1.66 (s, 1H). <sup>13</sup>C NMR (100 MHz, CDCl<sub>3</sub>) δ 157.1, 137.8, 135.5, 133.8, 131.2, 130.7, 129.0, 128.9, 128.7, 127.7, 120.7, 110.2, 69.1, 55.3, 39.2, 29.7, 21.5, 21.0. IR (KBr) (ν/cm<sup>-1</sup>): 3752, 3645, 2926, 1631, 1500, 1234, 1021, 758. HRMS (ESI): *m/z* for C<sub>18</sub>H<sub>20</sub>O<sub>2</sub>Na [M+Na]<sup>+</sup> calcd 291.1361, found 291.1369. [α]<sub>D</sub><sup>25</sup> = +181.46 (*c* 0.30, CH<sub>2</sub>Cl<sub>2</sub>). HPLC (Chiralpak IB-3, *n*-hexane/*i*-PrOH = 95/5, UV = 220 nm, flow rate = 1.0 mL/min), 25 °C, *t*<sub>major</sub> = 9.438 min, *t*<sub>minor</sub> = 13.011 min.

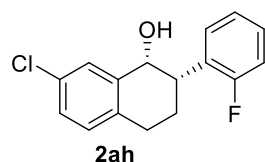

**(1R,2S)-6-Chloro-2-(2-fluorophenyl)-1,2,3,4-tetrahydronaphthalen-1-ol (2ah):** White solid (98%, 96% ee, >20:1 dr). Mp: 121–122 °C. <sup>1</sup>H NMR (400 MHz, CDCl<sub>3</sub>) δ 7.31–7.18 (m, 5H), 7.15–7.06 (m, 2H), 4.62 (d, *J* = 3.2 Hz, 1H), 3.40 (dt, *J* = 13.2, 2.8 Hz, 1H), 2.99–2.93 (m, 1H), 2.90–2.81 (m, 1H), 2.33–2.22 (m, 1H), 2.12 (brs, 1H), 1.84–1.78 (m, 1H). <sup>13</sup>C NMR (100 MHz, CDCl<sub>3</sub>) δ 161.7 (d, *J* = 243.6 Hz), 139.4, 134.9, 131.6, 130.4 (d, *J* = 11.0 Hz), 129.6 (d, *J* = 4.5 Hz), 129.0 (d, *J* = 14.1 Hz), 128.2 (t, *J* = 2.7 Hz), 124.2, 124.1, 115.4, 115.1, 69.0, 38.3 (d, *J* = 1.6 Hz), 29.3, 21.0. <sup>19</sup>F NMR (376 MHz, CDCl<sub>3</sub>) δ -118.8; IR (KBr) (ν/cm<sup>-1</sup>): 3756, 3679, 3568, 2926, 1631, 1457, 1228, 1086, 959. HRMS (ESI): *m/z* for C<sub>16</sub>H<sub>14</sub>ClFONa [M+Na]<sup>+</sup> calcd 299.0615, found 299.0623. [α]<sub>D</sub><sup>25</sup> = +102.27 (*c* 0.30, CH<sub>2</sub>Cl<sub>2</sub>). HPLC (Chiralpak IE, *n*-hexane/*i*-PrOH = 95/5, UV = 220 nm, flow rate = 1.0 mL/min), 25 °C, *t*<sub>major</sub> = 9.291 min, *t*<sub>minor</sub> = 16.847 min.

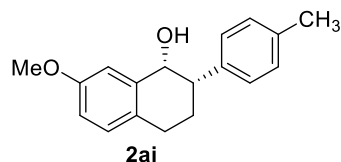

**(1R,2S)-7-Methoxy-2-(4-tolyl)-1,2,3,4-tetrahydronaphthalen-1-ol (2ai):** White solid (98%, 99% ee, >20:1 dr). Mp: 84–85 °C. <sup>1</sup>H NMR (400 MHz, CDCl<sub>3</sub>) δ 7.19–7.14 (m, 4H), 7.06 (d, *J* = 8.4 Hz, 1H), 6.84–6.80 (m, 2H), 4.65 (d, *J* = 4.8 Hz, 1H), 3.76 (s, 3H), 3.01 (dt, *J* = 12.4, 3.2 Hz, 1H), 2.94–2.87 (m, 1H), 2.83–2.74 (m, 1H), 2.37–2.28 (m, 4H), 1.90–1.84 (m, 1H), 1.71 (s, 1H). <sup>13</sup>C NMR

(100 MHz, CDCl<sub>3</sub>)  $\delta$  157.9, 139.5, 138.7, 136.3, 130.0, 129.3, 128.8, 128.1, 114.9, 114.5, 71.5, 55.3, 45.6, 28.9, 22.0, 21.1. IR (KBr) (v/cm<sup>-1</sup>): 3746, 3572, 2926, 1688, 1031, 1500, 1234, 1026, 823, 758. HRMS (ESI):  $m/z$  for C<sub>18</sub>H<sub>20</sub>O<sub>2</sub>Na [M+Na]<sup>+</sup> calcd 291.1361, found 291.1368. [ $\alpha$ ]<sub>D</sub><sup>25</sup> = +130.67 (*c* 0.30, CH<sub>2</sub>Cl<sub>2</sub>). HPLC (Chiralpak IA, *n*-hexane/*i*-PrOH = 95/5, UV = 220 nm, flow rate = 1.0 mL/min), 25 °C,  $t_{\text{major}}$  = 25.107 min,  $t_{\text{minor}}$  = 49.728 min.

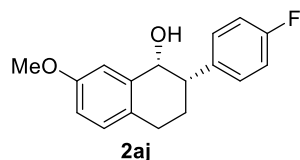

**(1R,2S)-2-(4-Fluorophenyl)-7-methoxy-1,2,3,4-tetrahydronaphthalen-1-ol (2aj):** White solid (96%, 99.1% ee, >20:1 dr). Mp: 75–76 °C. <sup>1</sup>H NMR (400 MHz, CDCl<sub>3</sub>)  $\delta$  7.25–7.21 (m, 2H), 7.09–6.99 (m, 3H), 6.84–6.80 (m, 2H), 4.61 (d, *J* = 3.2 Hz, 1H), 3.76 (s, 3H), 3.00 (dt, *J* = 12.8, 2.8 Hz, 1H), 2.93–2.87 (m, 1H), 2.84–2.79 (m, 1H), 2.35–2.20 (m, 1H), 1.88–1.82 (m, 1H), 1.80 (brs, 1H). <sup>13</sup>C NMR (100 MHz, CDCl<sub>3</sub>)  $\delta$  161.8 (d, *J* = 243.2 Hz), 157.9, 138.7, 138.4 (d, *J* = 3.3 Hz), 130.1, 129.7 (d, *J* = 7.6 Hz), 128.6, 115.3 (d, *J* = 20.2 Hz), 115.0, 114.5, 71.4, 55.4, 45.3, 28.8, 22.2. <sup>19</sup>F NMR (376 MHz, CDCl<sub>3</sub>)  $\delta$  -116.8. IR (KBr) (v/cm<sup>-1</sup>): 3752, 3644, 2932, 1599, 1508, 1279, 1113, 827. HRMS (ESI):  $m/z$  for C<sub>17</sub>H<sub>17</sub>FO<sub>2</sub>Na [M+Na]<sup>+</sup> calcd 295.1110, found 295.1115. [ $\alpha$ ]<sub>D</sub><sup>25</sup> = +132.67 (*c* 0.30, CH<sub>2</sub>Cl<sub>2</sub>). HPLC (Chiralpak IB-3, *n*-hexane/*i*-PrOH = 95/5, UV = 220 nm, flow rate = 1.0 mL/min), 25 °C,  $t_{\text{major}}$  = 15.822 min,  $t_{\text{minor}}$  = 27.449 min.

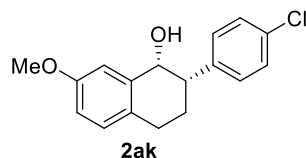

**(1R,2S)-2-(4-Chlorophenyl)-7-methoxy-1,2,3,4-tetrahydronaphthalen-1-ol (2ak):** White solid (95%, 99.2% ee, >20:1 dr). Mp: 76–77 °C. <sup>1</sup>H NMR (400 MHz, CDCl<sub>3</sub>)  $\delta$  7.31–7.26 (m, 2H), 7.22–7.17 (m, 2H), 7.06 (d, *J* = 4.8 Hz, 1H), 6.83–6.80 (m, 2H), 4.58 (d, *J* = 3.2 Hz, 1H), 3.76 (s, 3H), 2.97 (dt, *J* = 12.8, 2.8 Hz, 1H), 2.91–2.85 (m, 1H), 2.82–2.74 (m, 1H), 2.30–2.19 (m, 1H), 1.88–1.77 (m, 2H). <sup>13</sup>C NMR (100 MHz, CDCl<sub>3</sub>)  $\delta$  158.0, 141.3, 138.7, 132.4, 130.1, 129.7, 128.6, 128.5, 115.0, 114.5, 71.3, 55.4, 45.5, 28.8, 22.1. IR (KBr) (v/cm<sup>-1</sup>): 3758, 1771, 1523, 1456, 1088. HRMS (ESI):  $m/z$  for C<sub>17</sub>H<sub>17</sub>ClO<sub>2</sub>Na [M+Na]<sup>+</sup> calcd 311.0815, found 311.0828. [ $\alpha$ ]<sub>D</sub><sup>25</sup> = +121.87 (*c* 0.30, CH<sub>2</sub>Cl<sub>2</sub>). HPLC (Chiralpak IA, *n*-hexane/*i*-PrOH = 95/5, UV = 220 nm, flow rate = 1.0 mL/min), 25 °C,  $t_{\text{major}}$  = 29.506 min,  $t_{\text{minor}}$  = 50.045 min.

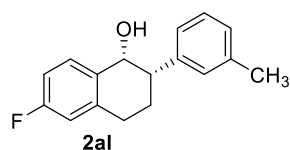

**(1R,2S)-6-Fluoro-2-(3-tolyl)-1,2,3,4-tetrahydronaphthalen-1-ol (2al):** White solid (97%, 99% ee, >20:1 dr). Mp: 61–62 °C. <sup>1</sup>H NMR (400 MHz, CDCl<sub>3</sub>)  $\delta$  7.28–7.22 (m, 2H), 7.13–7.05 (m, 3H),

6.94–6.81 (m, 2H), 4.69 (d,  $J = 3.2$  Hz, 1H), 3.01 (dt,  $J = 13.2, 2.8$  Hz, 1H), 2.96–2.94 (m, 1H), 2.90–2.81 (m, 1H), 2.41–2.31 (m, 4H), 1.92–1.86 (m, 1H) 1.67 (brs, 1H).  $^{13}\text{C}$  NMR (100 MHz,  $\text{CDCl}_3$ )  $\delta$  163.4 (d,  $J = 244.7$  Hz), 142.3, 139.2 (d,  $J = 7.6$  Hz), 138.3, 133.5 (d,  $J = 2.9$  Hz), 132.3 (d,  $J = 8.4$  Hz), 129.0, 128.6, 127.7, 125.2, 115.1 (d,  $J = 20$  Hz), 113.4 (d,  $J = 21.4$  Hz), 70.7, 46.0, 29.9 (d,  $J = 1.7$  Hz), 21.6, 21.1.  $^{19}\text{F}$  NMR (376 MHz,  $\text{CDCl}_3$ )  $\delta$  -114.1. IR (KBr) ( $\text{v}/\text{cm}^{-1}$ ): 3758, 3574, 2932, 1682, 1455, 1080, 872. HRMS (ESI):  $m/z$  for  $\text{C}_{17}\text{H}_{17}\text{FONa}$   $[\text{M}+\text{Na}]^+$  calcd 279.1161, found 279.1169.  $[\alpha]_{\text{D}}^{25} = +154.72$  ( $c$  1.18,  $\text{CH}_2\text{Cl}_2$ ). HPLC (Chiralpak IE,  $n$ -hexane/ $i$ -PrOH = 95/5, UV = 220 nm, flow rate = 1.0 mL/min), 25 °C,  $t_{\text{major}} = 8.931$  min,  $t_{\text{minor}} = 17.814$  min.

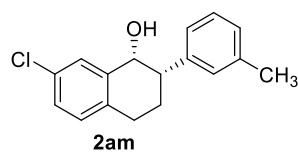

**(1R,2S)-7-Chloro-2-(3-tolyl)-1,2,3,4-tetrahydronaphthalen-1-ol (2am):** White solid (96%, 99.4% ee, >20:1 dr). Mp: 81–82 °C.  $^1\text{H}$  NMR (400 MHz,  $\text{CDCl}_3$ )  $\delta$  7.29–7.28 (m, 1H), 7.25 (d,  $J = 8.0$  Hz, 1H), 7.20 (dd,  $J = 8.4, 1.6$  Hz, 1H), 7.13–7.06 (m, 4H), 4.62 (d,  $J = 3.2$  Hz, 1H), 3.04–2.90 (m, 2H), 2.88–2.75 (m, 1H), 2.38 (s, 3H), 2.36–2.27 (m, 1H), 1.96–1.85 (m, 1H), 1.82 (s, 1H).  $^{13}\text{C}$  NMR (100 MHz,  $\text{CDCl}_3$ )  $\delta$  142.0, 139.4, 138.3, 135.2, 131.5, 130.4, 130.3, 129.1, 128.7, 128.2, 127.8, 125.2, 70.9, 45.8, 29.2, 21.6, 21.5. IR (KBr) ( $\text{v}/\text{cm}^{-1}$ ): 3726, 3675, 2910, 1652, 1590, 1450, 1028, 868, 805. HRMS (ESI):  $m/z$  for  $\text{C}_{17}\text{H}_{17}\text{ClONa}$   $[\text{M}+\text{Na}]^+$  calcd 295.0866, found 295.0875.  $[\alpha]_{\text{D}}^{25} = +124.00$  ( $c$  0.30,  $\text{CH}_2\text{Cl}_2$ ). HPLC (Chiralpak IB-3,  $n$ -hexane/ $i$ -PrOH = 95/5, UV = 220 nm, flow rate = 1.0 mL/min), 25 °C,  $t_{\text{major}} = 8.040$  min,  $t_{\text{minor}} = 9.087$  min.

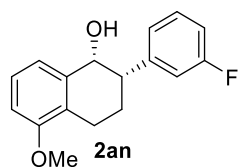

**(1R,2S)-2-(3-Fluorophenyl)-5-methoxy-1,2,3,4-tetrahydronaphthalen-1-ol (2an):** White solid (96%, 99% ee, >20:1 dr). Mp: 51–52 °C.  $^1\text{H}$  NMR (400 MHz,  $\text{CDCl}_3$ )  $\delta$  7.28 (td,  $J = 8.0, 6.0$  Hz, 1H), 7.19 (t,  $J = 7.6$  Hz, 1H), 7.05 (dt,  $J = 7.6, 1.2$  Hz, 1H), 7.00 (dt,  $J = 10.0, 2.4$  Hz, 1H), 6.93 (tdd,  $J = 8.5, 2.7, 1.0$  Hz, 1H), 6.88 (dd,  $J = 7.6, 1.2$  Hz, 1H), 6.78 (dd,  $J = 8.4, 1.2$  Hz, 1H), 4.62 (d,  $J = 2.4$  Hz, 1H), 3.82 (s, 3H), 3.06–3.00 (m, 1H), 2.95 (dt,  $J = 13.3, 2.8$  Hz, 1H), 2.63–2.47 (m, 1H), 2.21 (qd,  $J = 12.7, 5.7$  Hz, 1H), 1.92–1.82 (m, 2H).  $^{13}\text{C}$  NMR (100 MHz,  $\text{CDCl}_3$ )  $\delta$  163.0 (d,  $J = 244.0$  Hz), 157.3, 145.8 (d,  $J = 6.9$  Hz), 138.9, 129.9, 129.8, 126.8, 125.6, 123.9 (d,  $J = 2.8$  Hz), 122.4, 115.3 (d,  $J = 21.0$  Hz), 113.3 (d,  $J = 21.0$  Hz), 109.3, 71.1, 55.4, 45.4 (d,  $J = 1.8$  Hz), 23.7, 20.9.  $^{19}\text{F}$  NMR (376 MHz,  $\text{CDCl}_3$ )  $\delta$  -113.2. IR (KBr) ( $\text{v}/\text{cm}^{-1}$ ): 3752, 3649, 2932, 1715, 1299, 1508, 1155, 1034, 827. HRMS (ESI):  $m/z$  for  $\text{C}_{17}\text{H}_{17}\text{FO}_2\text{Na}$   $[\text{M}+\text{Na}]^+$  calcd 295.1110, found 295.1112.  $[\alpha]_{\text{D}}^{25} = +147.33$  ( $c$  0.30,  $\text{CH}_2\text{Cl}_2$ ). HPLC (Chiralpak IA,  $n$ -hexane/ $i$ -PrOH = 95/5, UV = 220 nm, flow rate = 1.0 mL/min), 25 °C,  $t_{\text{major}} = 12.784$  min,  $t_{\text{minor}} = 27.327$  min.



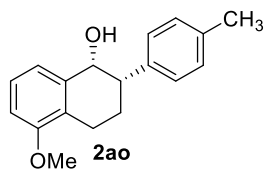

**(1R,2S)-5-Methoxy-2-(4-tolyl)-1,2,3,4-tetrahydronaphthalen-1-ol (2ao):** Colorless oil (98%, 98% ee, >20:1 dr). <sup>1</sup>H NMR (400 MHz, CDCl<sub>3</sub>) δ 7.20–7.14 (m, 5H), 6.92 (d, *J* = 7.6 Hz, 1H), 6.77 (d, *J* = 8.4 Hz, 1H), 4.69 (d, *J* = 2.4 Hz, 1H), 3.81 (s, 3H), 3.09–3.03 (m, 1H), 3.00–2.96 (m, 1H), 2.61–2.52 (m, 1H), 2.36–2.26 (m, 4H), 1.95–1.90 (m, 1H), 1.65 (s, 1H). <sup>13</sup>C NMR (100 MHz, CDCl<sub>3</sub>) δ 157.3, 139.7, 139.0, 136.2, 129.3, 128.1, 126.7, 125.8, 122.5, 109.1, 71.3, 55.4, 45.1, 23.8, 21.1, 21.0. IR (KBr) (ν/cm<sup>-1</sup>): 3748, 3509, 2930, 1739, 1645, 1400, 1230, 1082, 979, 788. HRMS (ESI): *m/z* for C<sub>18</sub>H<sub>20</sub>O<sub>2</sub>Na [M+Na]<sup>+</sup> calcd 291.1361, found 291,1362. [α]<sub>D</sub><sup>25</sup> = +126.97 (*c* 1.07, CH<sub>2</sub>Cl<sub>2</sub>). HPLC (Chiralpak IE, *n*-hexane/*i*-PrOH = 95/5, UV = 220 nm, flow rate = 1.0 mL/min), 25 °C, *t*<sub>major</sub> = 15.309 min, *t*<sub>minor</sub> = 31.626 min.

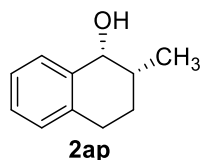

**(1R,2S)-2-Methyl-1,2,3,4-tetrahydronaphthalen-1-ol (2ap):**<sup>[111]</sup> Pale yellow oily (98%, 99.1% ee, >20:1 dr). <sup>1</sup>H NMR (400 MHz, CDCl<sub>3</sub>) δ 7.27–7.22 (m, 1H), 7.15–7.06 (m, 2H), 7.06–7.02 (m, 1H), 4.46 (d, *J* = 3.2 Hz, 1H), 2.82–2.73 (m, 1H), 2.72–2.63 (m, 1H), 1.88–1.75 (m, 1H), 1.72–1.61 (m, 1H), 1.59–1.53 (m, 1H), 1.52 (s, 1H), 1.04 (d, *J* = 6.8 Hz, 3H). <sup>13</sup>C NMR (100 MHz, CDCl<sub>3</sub>) δ 138.7, 136.8, 129.9, 129.1, 127.8, 126.1, 71.5, 34.3, 29.0, 24.8, 17.0. [α]<sub>D</sub><sup>25</sup> = +65.83 (*c* 0.24, CH<sub>2</sub>Cl<sub>2</sub>). SFC (Waters Trefoil CEL2, 98% CO<sub>2</sub>, 2% *i*-PrOH, UV = 210 nm, flow rate = 0.8 mL/min), 35 °C, *t*<sub>minor</sub> = 7.902 min, *t*<sub>major</sub> = 8.234 min.

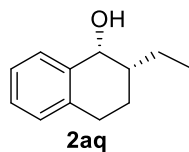

**(1R,2S)-2-Ethyl-1,2,3,4-tetrahydronaphthalen-1-ol (2aq):**<sup>[16]</sup> Pale yellow oily (96%, 99.4% ee, >20:1 dr). <sup>1</sup>H NMR (400 MHz, CDCl<sub>3</sub>) δ 7.36–7.33 (m, 1H), 7.24–7.17 (m, 2H), 7.15–7.11 (m, 1H), 4.67 (d, *J* = 2.8 Hz, 1H), 2.96–2.84 (m, 1H), 2.84–2.72 (m, 1H), 1.79–1.68 (m, 2H), 1.68–1.56 (m, 2H), 1.51–1.40 (m, 2H), 1.05 (t, *J* = 7.2 Hz, 3H). <sup>13</sup>C NMR (100 MHz, CDCl<sub>3</sub>) δ 138.7, 137.2, 130.1, 129.1, 127.9, 126.1, 69.7, 41.4, 29.3, 24.4, 22.8, 11.7. [α]<sub>D</sub><sup>25</sup> = +79.17 (*c* 0.24, CH<sub>2</sub>Cl<sub>2</sub>). HPLC (Chiralcel OX-H, *n*-hexane/*i*-PrOH = 99/1, UV = 220 nm, flow rate = 1.0 mL/min), 25 °C, *t*<sub>minor</sub> = 10.136 min, *t*<sub>major</sub> = 12.606 min.

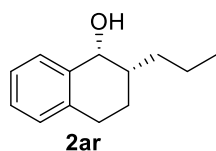

**(1R,2S)-2-Propyl-1,2,3,4-tetrahydronaphthalen-1-ol (2ar):** Yellow oily (97%, 99.4% ee, >20:1 dr). <sup>1</sup>H NMR (400 MHz, CDCl<sub>3</sub>) δ 7.37–7.33 (m, 1H), 7.25–7.17 (m, 2H), 7.15–7.11 (m, 1H), 4.64 (d, *J* = 2.0 Hz, 1H), 2.95–2.83 (m, 1H), 2.83–2.70 (m, 1H), 1.82–1.66 (m, 3H), 1.65–1.56 (m, 1H), 1.54–1.45 (m, 3H), 1.44–1.36 (m, 1H), 0.97 (t, *J* = 7.2 Hz, 3H). <sup>13</sup>C NMR (100 MHz, CDCl<sub>3</sub>) δ 138.8, 137.2, 130.1, 129.1, 127.9, 126.1, 70.1, 39.2, 33.8, 29.2, 23.0, 20.2, 14.4. IR (KBr) (ν/cm<sup>-1</sup>): 3736, 3651, 3568, 1649, 1512, 1265, 940. HRMS (ESI): *m/z* for C<sub>13</sub>H<sub>18</sub>ONa [M+Na]<sup>+</sup> calcd 213.1255, found 213.1263. [α]<sub>D</sub><sup>25</sup> = +66.00 (*c* 0.30, CH<sub>2</sub>Cl<sub>2</sub>). HPLC (Chiralcel OX-H, *n*-hexane/*i*-PrOH = 99/1, UV = 220 nm, flow rate = 1.0 mL/min), 25 °C, *t*<sub>minor</sub> = 9.160 min, *t*<sub>major</sub> = 11.129 min.

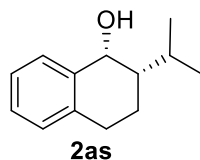

**(1R,2S)-2-Isopropyl-1,2,3,4-tetrahydronaphthalen-1-ol (2as):** Yellow oily (97%, 99.6% ee, >20:1 dr). <sup>1</sup>H NMR (400 MHz, CDCl<sub>3</sub>) δ 7.37 (dd, *J* = 6.8, 2.0 Hz, 1H), 7.29–7.21 (m, 2H), 7.18 (dd, *J* = 6.8, 2.0 Hz, 1H), 4.85 (d, *J* = 2.8 Hz, 1H), 2.96 (ddd, *J* = 17.1, 5.6, 2.0 Hz, 1H), 2.83–2.74 (m, 1H), 2.02–1.90 (m, 1H), 1.89–1.80 (m, 1H), 1.71 (qd, *J* = 12.8, 5.5 Hz, 1H), 1.31 (ddt, *J* = 12.3, 9.3, 2.8 Hz, 1H), 1.16 (d, *J* = 6.8 Hz, 3H), 1.09 (d, *J* = 6.8 Hz, 3H). <sup>13</sup>C NMR (100 MHz, CDCl<sub>3</sub>) δ 138.9, 137.2, 130.3, 129.02, 128.0, 126.1, 68.9, 46.7, 29.8, 28.7, 21.1, 20.8, 20.5. IR (KBr) (ν/cm<sup>-1</sup>): 3744, 3564, 2936, 1690, 1542, 1453, 1263, 1076. HRMS (ESI): *m/z* for C<sub>13</sub>H<sub>18</sub>ONa [M+Na]<sup>+</sup> calcd 213.1255, found 213.1262. [α]<sub>D</sub><sup>25</sup> = +68.83 (*c* 0.34, CH<sub>2</sub>Cl<sub>2</sub>). HPLC (Chiralcel OX-H, *n*-hexane/*i*-PrOH = 99/1, UV = 220 nm, flow rate = 1.0 mL/min), 25 °C, *t*<sub>minor</sub> = 8.189 min, *t*<sub>major</sub> = 9.938 min.

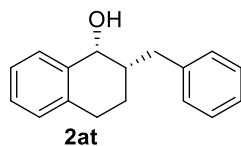

**(1R,2S)-2-Benzyl-1,2,3,4-tetrahydronaphthalen-1-ol (2at):**<sup>[21]</sup> White solid (95%, 99% ee, >20:1 dr). <sup>1</sup>H NMR (400 MHz, CDCl<sub>3</sub>) δ 7.32–7.08 (m, 9H), 4.49 (d, *J* = 2.8 Hz, 1H), 2.99–2.89 (m, 1H), 2.85 (ddd, *J* = 17.2, 5.7, 2.4 Hz, 1H), 2.76–2.68 (m, 2H), 2.05–2.00 (m, 1H), 1.87–1.75 (m, 1H), 1.71–1.65 (m, 1H), 1.59 (dd, *J* = 9.6, 5.2 Hz, 1H). <sup>13</sup>C NMR (100 MHz, CDCl<sub>3</sub>) δ 140.8, 138.6, 137.0, 130.1, 129.3, 129.2, 128.4, 128.1, 126.2, 126.0, 69.4, 41.8, 38.3, 29.3, 22.6. [α]<sub>D</sub><sup>25</sup> = +83.73 (*c* 0.30, CH<sub>2</sub>Cl<sub>2</sub>). HPLC (Chiralcel AD-H, *n*-hexane/*i*-PrOH = 99/1, UV = 220 nm, flow rate = 1.0 mL/min), 25 °C, *t*<sub>major</sub> = 10.405 min, *t*<sub>minor</sub> = 12.670 min.

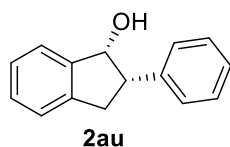

**(1R,2S)-2-Phenyl-2,3-dihydro-1H-inden-1-ol (2au):**<sup>[17]</sup> White solid (98%, 97% ee, >20:1 dr). <sup>1</sup>H NMR (400 MHz, CDCl<sub>3</sub>) δ 7.36 (d, *J* = 7.2 Hz, 1H), 7.28–7.11 (m, 8H), 5.14 (d, *J* = 6.0 Hz, 1H), 3.65 (td, *J* = 7.6, 5.8 Hz, 1H), 3.31 (dd, *J* = 15.8, 7.8 Hz, 1H), 3.13 (dd, *J* = 15.8, 7.7 Hz, 1H), 1.41 (s, 1H). <sup>13</sup>C NMR (100 MHz, CDCl<sub>3</sub>) δ 143.8, 143.2, 139.3, 128.9, 128.7, 128.6, 127.1, 127.0, 125.2, 124.8, 77.5, 51.1, 35.8. [α]<sub>D</sub><sup>25</sup> = +105.71 (*c* 0.28, CH<sub>2</sub>Cl<sub>2</sub>). HPLC (Chiralpak IA, *n*-hexane/*i*-PrOH = 99.5/0.5, UV = 220 nm, flow rate = 0.5 mL/min), 25 °C, *t*<sub>major</sub> = 61.442 min, *t*<sub>minor</sub> = 90.475 min.

## 4. Scale-up Synthesis and Transformations

### 4.1 Scale-up synthesis of 2a

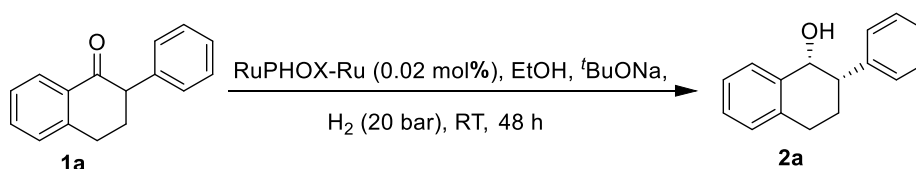

The substrate **1a** (1.24 g, 5.6 mmol), (*S,S*)-RuPHOX-Ru (1.04 mg, 0.02% mmol) and *t*BuONa (1.24 g, 2.8 mmol) were placed in a 50 mL flame-dried round bottom flask equipped with a magnetic stir bar. The mixture was dissolved in anhydrous and degassed EtOH (20 mL) in a glove box. This flask was put into an autoclave. After purging with hydrogen three times, the hydrogen pressure was finally pressurized to 20 bar. The reaction mixture was vigorously stirred at room temperature for 48 h. The reaction mixture was concentrated and purified via silica gel column chromatography (PE/EtOAc = 10/1) to provide **2a** (1.17 g, 94%, 99.1% ee, >20:1 dr). [α]<sub>D</sub><sup>25</sup> = +162.00 (*c* 0.30, CH<sub>2</sub>Cl<sub>2</sub>). HPLC conditions: Chiralpak IA Column, *n*-hexane/*i*-PrOH = 95/5, 220 nm, 1.0 mL/min, *t*<sub>major</sub> = 12.425 min, *t*<sub>minor</sub> = 25.540 min, 99.1% ee.

### 4.2 Synthesis of (*R*)-2-phenyl-1,2,3,4-tetrahydronaphthalene (**3**)<sup>[18]</sup>

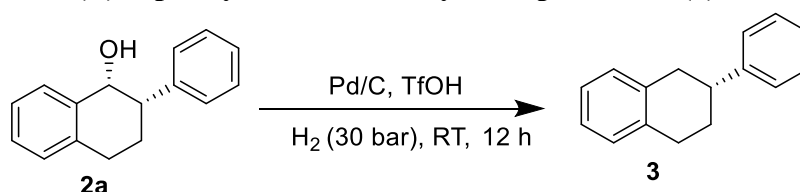

A hydrogenation tube was charged with a stirring bar, **2a** (0.22 mmol), Pd/C (20% mmol) and TfOH (0.2 equiv). MeOH (2 mL) was then injected into the hydrogenation tube by a syringe. The hydrogenation tube was then put into an autoclave. The autoclave was then charged with hydrogen to 30 bar hydrogen pressure, and the reaction mixture was stirred at RT for 12 h. The solvent was evaporated to afford the crude product and it was purified by a silica gel column chromatography (PE: EtOAc = 10:1) to give pure product **3** as colorless oil (47 mg, 99%).<sup>[19]</sup> <sup>1</sup>H NMR (400 MHz,

CDCl<sub>3</sub>)  $\delta$  7.27–7.11 (m, 5H), 7.06–7.00 (m, 4H), 3.00–2.81 (m, 5H), 2.09–2.03 (m, 1H), 1.92–1.78 (m, 1H). <sup>13</sup>C NMR (100 MHz, CDCl<sub>3</sub>)  $\delta$  146.7, 136.7, 136.3, 129.1, 129.0, 128.6, 126.9, 126.3, 125.8, 125.7, 40.8, 37.8, 30.4, 29.8.  $[\alpha]_D^{25} = +44.11$  (*c* 0.36, CH<sub>2</sub>Cl<sub>2</sub>); HPLC (Chiralcel OD-H, *n*-hexane/*i*-PrOH = 99/1, UV = 220 nm, flow rate = 1.0 mL/min),  $t_{\text{minor}} = 6.080$  min and  $t_{\text{major}} = 6.732$  min, 99.8% ee.

### 4.3 Synthesis of (1*R*,2*S*)-2-phenyl-1,2,3,4-tetrahydronaphthalen-1-yl acetate (**4**)<sup>[20]</sup>

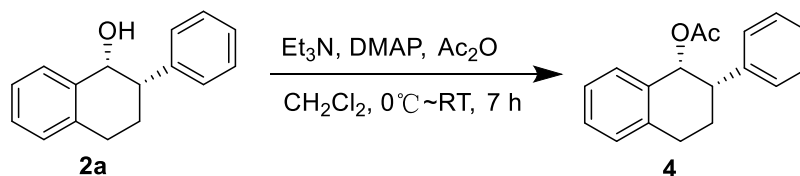

Et<sub>3</sub>N (1.34 mmol) and 4-dimethylaminopyridine (DMAP, cat.) were added to a stirred solution of **2a** (150 mg, 0.67 mmol) in DCM (10 mL), followed by the addition of acetic anhydride (1.68 mmol) at 0 °C. The reaction mixture was stirred at room temperatures for 7 h. Then the reaction mixture was diluted with water, and the aqueous phase was extracted with DCM (10 mL × 3). The combined organic phase was washed with saturated aqueous NaHCO<sub>3</sub> (10 mL × 3) and brine (10 mL × 3) and dried over anhydrous Na<sub>2</sub>SO<sub>4</sub>. Then the solvent was evaporated to provide crude product, which was then purified via silica gel column chromatography (PE/EtOAc = 20/1) to afford pure **4** as white solid (175 mg, 98%).<sup>[21]</sup> <sup>1</sup>H NMR (400 MHz, CDCl<sub>3</sub>)  $\delta$  7.39 (d, *J* = 7.2 Hz, 1H), 7.35–7.14 (m, 8H), 6.21 (d, *J* = 3.3 Hz, 1H), 3.19 (dt, *J* = 13.0, 3.1 Hz, 1H), 3.08 (ddd, *J* = 17.2, 5.6, 2.2 Hz, 1H), 3.00–2.90 (m, 1H), 2.47 (qd, *J* = 12.7, 5.6 Hz, 1H), 2.09–1.98 (m, 1H), 1.78 (s, 3H). <sup>13</sup>C NMR (100 MHz, CDCl<sub>3</sub>)  $\delta$  170.1, 141.9, 137.2, 135.0, 130.7, 129.1, 128.6, 128.2, 128.1, 126.8, 126.3, 72.0, 44.5, 29.5, 22.7, 21.0.  $[\alpha]_D^{25} = +284.67$  (*c* 0.24, CH<sub>2</sub>Cl<sub>2</sub>). HPLC (Chiralcel AD-H, *n*-hexane/*i*-PrOH = 95/5, UV = 220 nm, flow rate = 1.0 mL/min),  $t_{\text{minor}} = 5.208$  min and  $t_{\text{major}} = 5.889$  min, >20:1 dr, 99.3% ee.

### 4.4 Synthesis of (1*R*,2*S*)-1-(difluoromethoxy)-2-phenyl-1,2,3,4-tetrahydronaphthalene (**5**)<sup>[22]</sup>

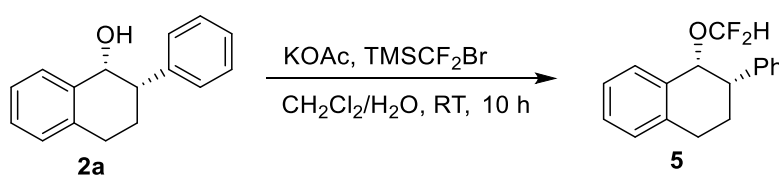

To a 10 mL shrek tube were added **2a** (0.5 mmol) and KOAc (3.0 mmol). Then CH<sub>2</sub>Cl<sub>2</sub> (0.3 mL) and H<sub>2</sub>O (0.3 mL) were added. The reactions were stirred at room temperature and TMSCF<sub>2</sub>Br (1.5 mmol) was added. After 10 hours, the mixture was diluted with CH<sub>2</sub>Cl<sub>2</sub> (5 mL) and purified via a silica gel column chromatography (PE/EtOAc = 10/1) to afford pure **5** as a white solid (197 mg, 76%). Mp: 64–65 °C. <sup>1</sup>H NMR (400 MHz, CDCl<sub>3</sub>)  $\delta$  7.35–7.17 (m, 9H), 5.85–5.46 (m, 1H), 5.08 (s, 1H), 3.15–3.12 (m, 1H), 3.09–3.02 (m, 1H), 2.55–2.44 (m, 1H), 2.03–1.97 (m, 1H). <sup>13</sup>C NMR

(100 MHz, CDCl<sub>3</sub>)  $\delta$  141.7, 137.3, 134.2, 130.4, 129.4, 128.9, 128.4 (d,  $J = 6.0$  Hz), 127.0, 126.2, 116.5 (dd,  $J = 259.0, 253.4$  Hz), 76.2, 45.1, 29.1, 22.3. <sup>19</sup>F NMR (376 MHz, CDCl<sub>3</sub>)  $\delta$  -80.0 (dd,  $J = 445.6, 161.7$  Hz, 2F). IR (KBr) ( $\nu/\text{cm}^{-1}$ ): 3732, 3647, 3564, 3066, 2934, 2308, 1498, 1455, 1188, 1019, 748. HRMS (ESI):  $m/z$  for C<sub>16</sub>H<sub>15</sub> [M-OCF<sub>2</sub>H]<sup>+</sup> calcd 207.1174, found 207.1177.  $[\alpha]_{\text{D}}^{25} = +143.83$  ( $c$  0.24, CH<sub>2</sub>Cl<sub>2</sub>). SFC (Waters Trefoil CEL1, 98% CO<sub>2</sub>, 2% EtOH, UV = 210 nm, flow rate = 0.5 mL/min),  $t_{\text{major}} = 7.300$  min and  $t_{\text{minor}} = 9.486$  min, >20:1 dr, 92% ee.

#### 4.5 Synthesis of (*S*)-2-phenyl-3,4-dihydronaphthalen-1(2*H*)-one (**6**)<sup>[18]</sup>

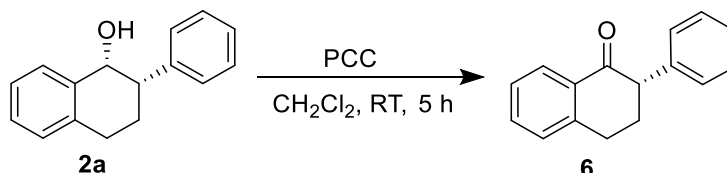

**2a** (0.45 mmol) was treated with PCC (155 mg) in CH<sub>2</sub>Cl<sub>2</sub> (2 mL) at room temperature for 5 h before evaporation of DCM. Then Et<sub>2</sub>O (10 mL) was added to the residue. The resulting mixture was filtered through a plug of silica washing with Et<sub>2</sub>O (5 mL). The solvent was evaporated to give crude product which was purified by a silica gel column chromatography (PE/EtOAc = 10:1) to give pure product **6** as white solid (99.2mg, 99%). <sup>1</sup>H NMR (400 MHz, CDCl<sub>3</sub>)  $\delta$  8.10 (dd,  $J = 7.6, 0.8$  Hz, 1H), 7.51 (dt,  $J = 13.6, 1.2$  Hz, 1H), 7.36–7.33 (m, 3H), 7.29–7.25 (m, 2H), 7.20–7.18 (m, 2H), 3.83–3.79 (m, 1H), 3.17–3.01 (m, 2H), 2.47–2.41 (m, 2H).  $[\alpha]_{\text{D}}^{25} = +28.00$  ( $c$  0.30, CH<sub>2</sub>Cl<sub>2</sub>). HPLC (Chiralpak IA, *n*-hexane/*i*-PrOH = 95/5, UV = 220 nm, flow rate = 1.0 mL/min),  $t_{\text{minor}} = 8.874$  min and  $t_{\text{major}} = 10.919$  min, 97% ee.

#### 4.6 Synthesis of (1*R*,2*S*)-1-allyl-2-phenyl-1,2,3,4-tetrahydronaphthalen-1-ol (**7**)

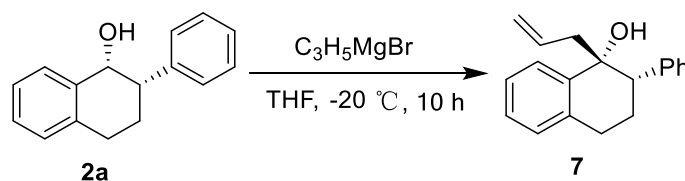

To a 10 mL Shrek tube were added **2a** (0.4 mmol) and THF (2 mL). Then C<sub>3</sub>H<sub>5</sub>MgBr (0.48 mmol) was added dropwise at -20 °C. After 10 hours, the reaction mixture was diluted with CH<sub>2</sub>Cl<sub>2</sub> (5 mL) and then purified via silica gel column chromatography (PE/EtOAc = 10/1) to afford pure **7** as a colorless oil (75 mg, 77%). <sup>1</sup>H NMR (400 MHz, CDCl<sub>3</sub>) major diastereomer:  $\delta$  7.48 (dd,  $J = 7.6, 1.7$  Hz, 1H), 7.28–7.06 (m, 8H), 7.02 (dd,  $J = 7.3, 1.8$  Hz, 1H), 5.47–5.36 (m, 1H), 5.03–4.90 (m, 2H), 3.08 (dd,  $J = 10.8, 3.2$  Hz, 1H), 2.79–2.70 (m, 2H), 2.37 (dd,  $J = 14.4, 8.1$  Hz, 1H), 2.15–2.05 (m, 1H), 1.89–1.86 (m, 1H), 1.72 (s, 1H). <sup>13</sup>C NMR (100 MHz, CDCl<sub>3</sub>)  $\delta$  141.8, 140.4, 137.4, 134.6, 129.8, 129.0, 128.4, 127.5, 127.4, 126.9, 126.6, 118.3, 73.6, 48.2, 45.5, 29.6, 26.1. minor diastereomer  $\delta$  141.8, 141.2, 135.9, 134.2, 129.7, 128.7, 128.1, 127.4, 125.7, 118.2, 74.5, 51.9, 43.2, 29.2, 25.5. IR (KBr) ( $\nu/\text{cm}^{-1}$ ): 3735, 3584, 3070, 2834, 1747, 1623, 1457, 1269, 1082, 912, 768.

HRMS (ESI):  $m/z$  for  $C_{19}H_{20}ONa [M+Na]^+$  calcd 287.1412, found 287.1419.  $[\alpha]_D^{25} = +87.69$  ( $c$  1.16,  $CH_2Cl_2$ ); HPLC (Chiralcel OD-H,  $n$ -hexane/ $i$ -PrOH = 99/1, UV = 220 nm, flow rate = 1.0 mL/min),  $t_{major1} = 12.730$  min and  $t_{minor1} = 18.549$  min;  $t_{minor2} = 19.923$  min and  $t_{major2} = 21.675$  min, dr = 3.2:1, ee = 96%, 98%.

## 5. Deuterium-Labeling Experiments

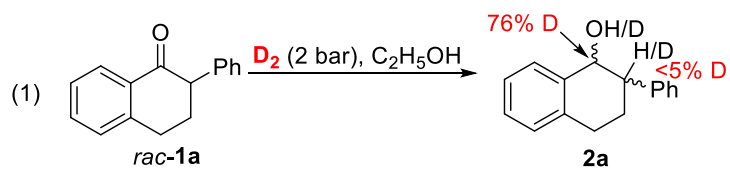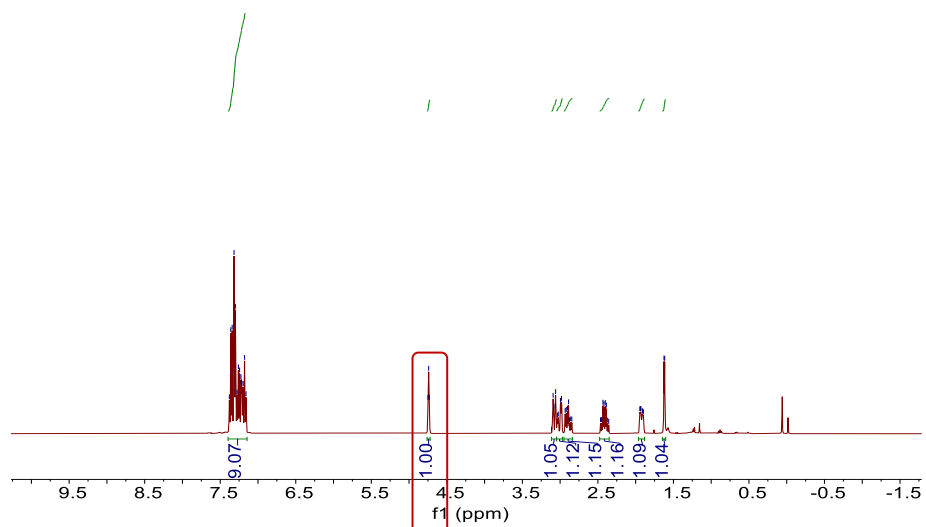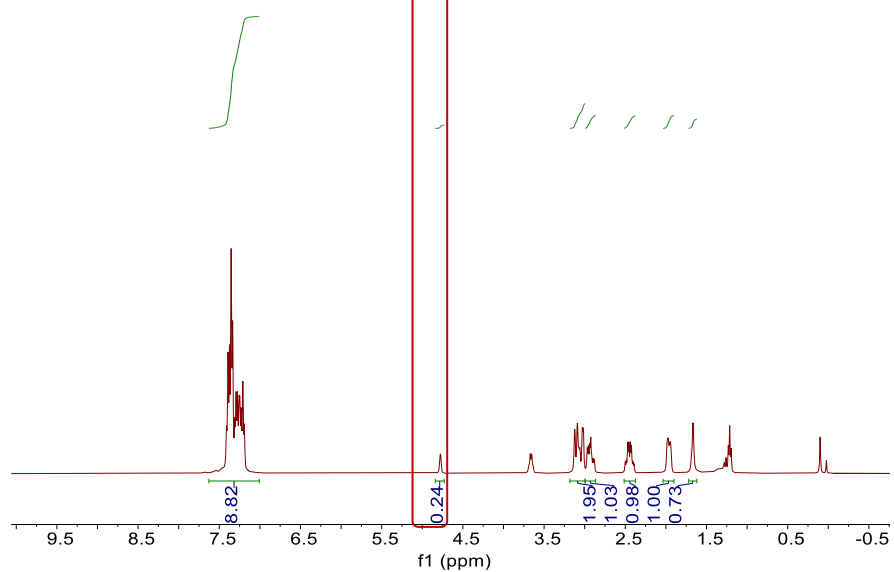

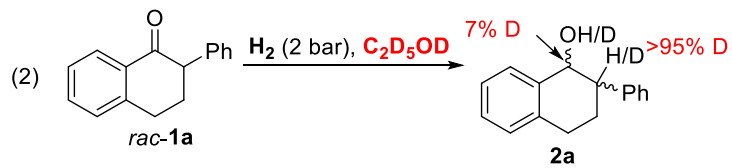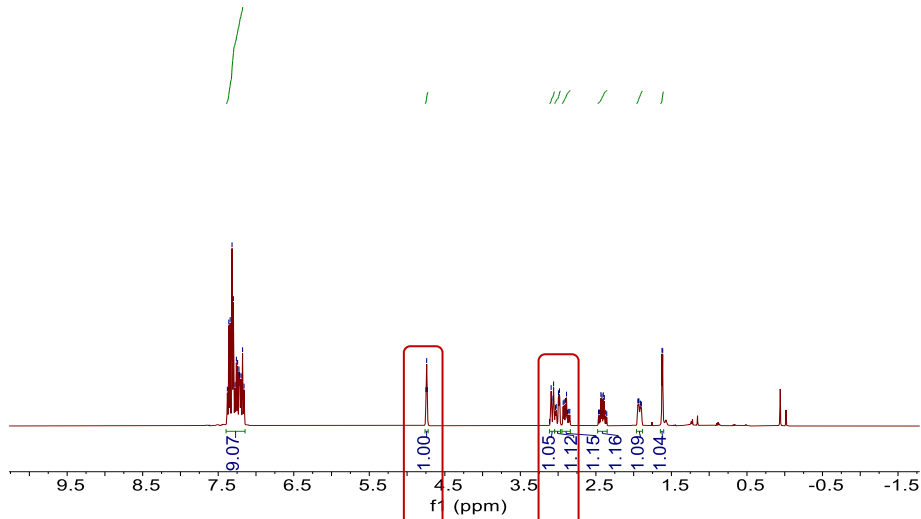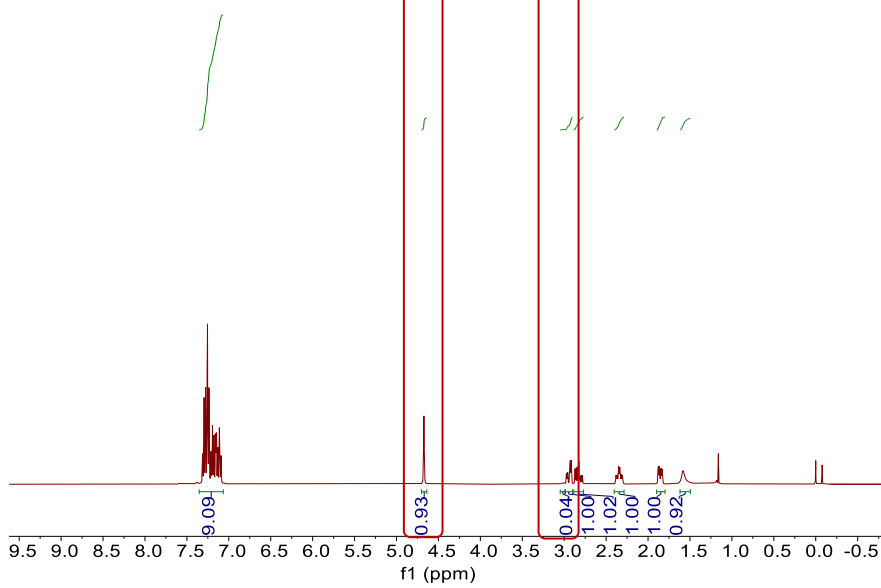



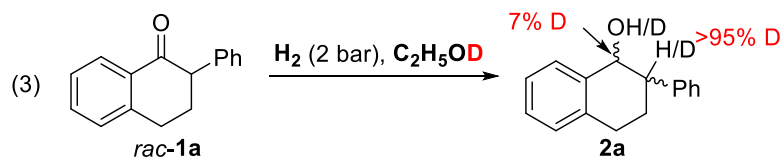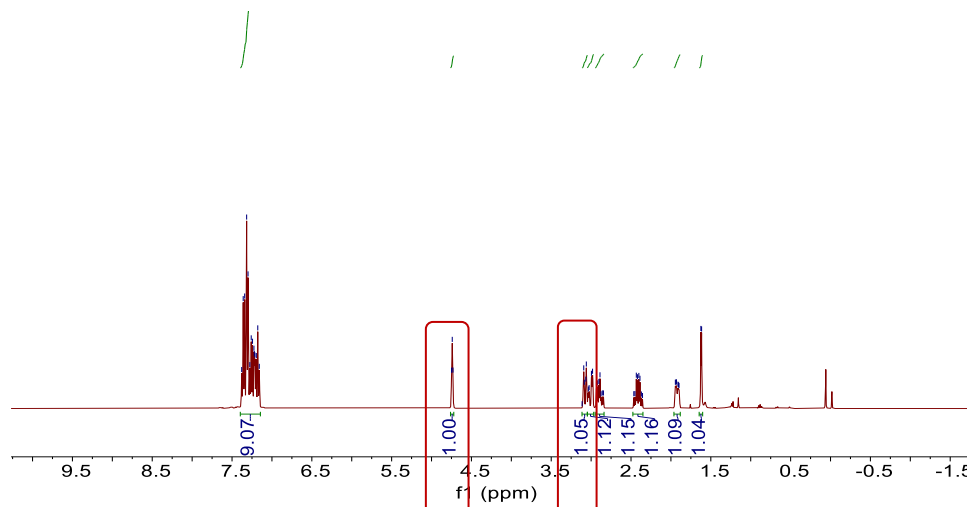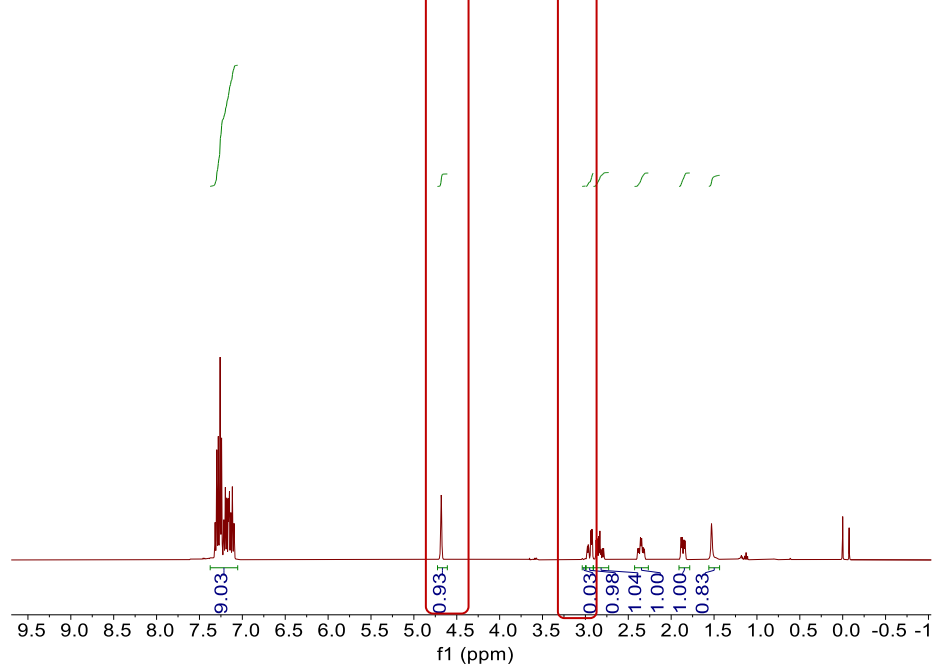

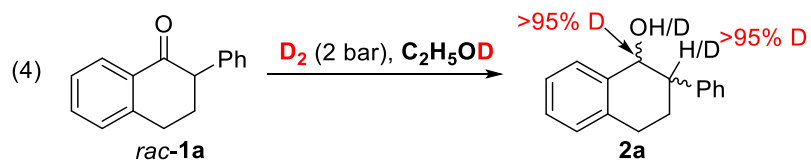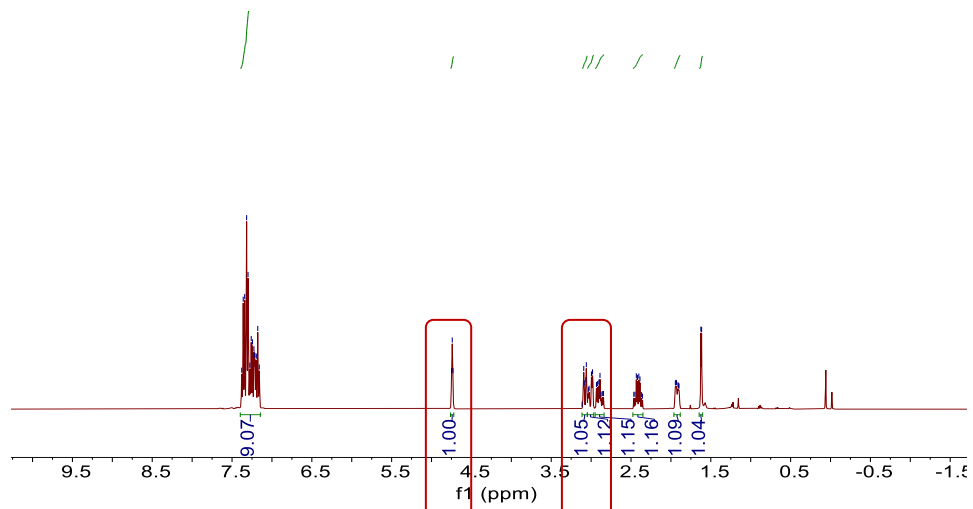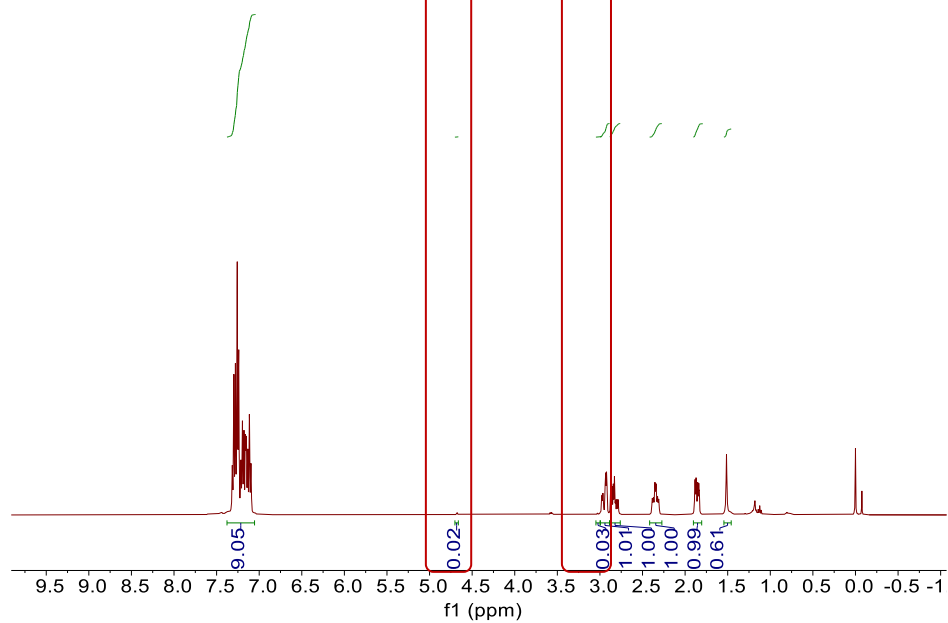

## 6. X-Ray Analysis

X-Ray Crystallography Data for **2ak** (2126054). A colorless crystal suitable for X-ray crystallography was obtained from a *n*-hexane/DCM solution at room temperature under air.

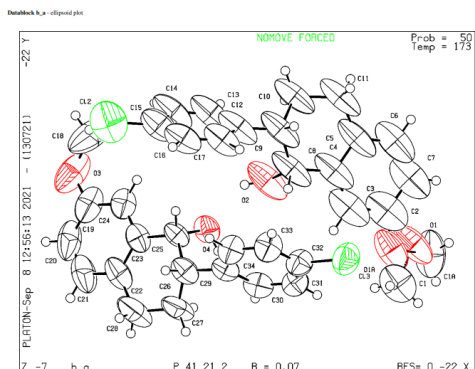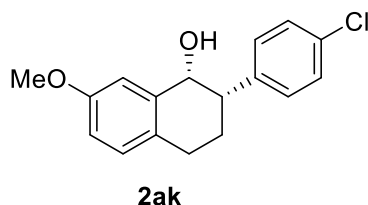

The ORTEP drawing (50% probability for thermal ellipsoids) of **2ak**

### checkCIF/PLATON report

Structure factors have been supplied for datablock(s) b\_a

THIS REPORT IS FOR GUIDANCE ONLY. IF USED AS PART OF A REVIEW PROCEDURE FOR PUBLICATION, IT SHOULD NOT REPLACE THE EXPERTISE OF AN EXPERIENCED CRYSTALLOGRAPHIC REFEREE.

No syntax errors found. CIF dictionary Interpreting this report

### Datablock: b\_a

Bond precision: C-C = 0.0109 Å Wavelength=1.54178  
Cell: a=12.7413 (4) b=12.7413 (4) c=37.1305 (16)  
alpha=90 beta=90 gamma=90  
Temperature: 173 K

|                        | Calculated    | Reported      |
|------------------------|---------------|---------------|
| Volume                 | 6027.8 (5)    | 6027.8 (5)    |
| Space group            | P 41 21 2     | P 41 21 2     |
| Hall group             | P 4abw 2nw    | P 4abw 2nw    |
| Moiety formula         | C17 H17 Cl O2 | C17 H17 Cl O2 |
| Sum formula            | C17 H17 Cl O2 | C17 H17 Cl O2 |
| Mr                     | 288.76        | 288.75        |
| Dx, g cm <sup>-3</sup> | 1.273         | 1.273         |
| Z                      | 16            | 16            |
| Mu (mm <sup>-1</sup> ) | 2.226         | 2.226         |
| F000                   | 2432.0        | 2432.0        |
| F000'                  | 2444.12       |               |
| h, k, lmax             | 15, 15, 44    | 15, 15, 44    |
| Nref                   | 5346 [ 3149]  | 5332          |
| Tmin, Tmax             | 0.673, 0.800  | 0.624, 0.753  |
| Tmin'                  | 0.610         |               |

Correction method= # Reported T Limits: Tmin=0.624 Tmax=0.753  
AbsCorr = NONE

Data completeness= 1.69/1.00 Theta(max)= 66.783

R(reflections)= 0.0706 ( 4551) wR2(reflections)=  
S = 1.098 Npar= 383 0.2100 ( 5332)

## 7. NMR Spectra

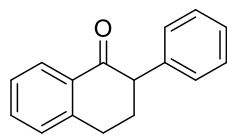

**1a**

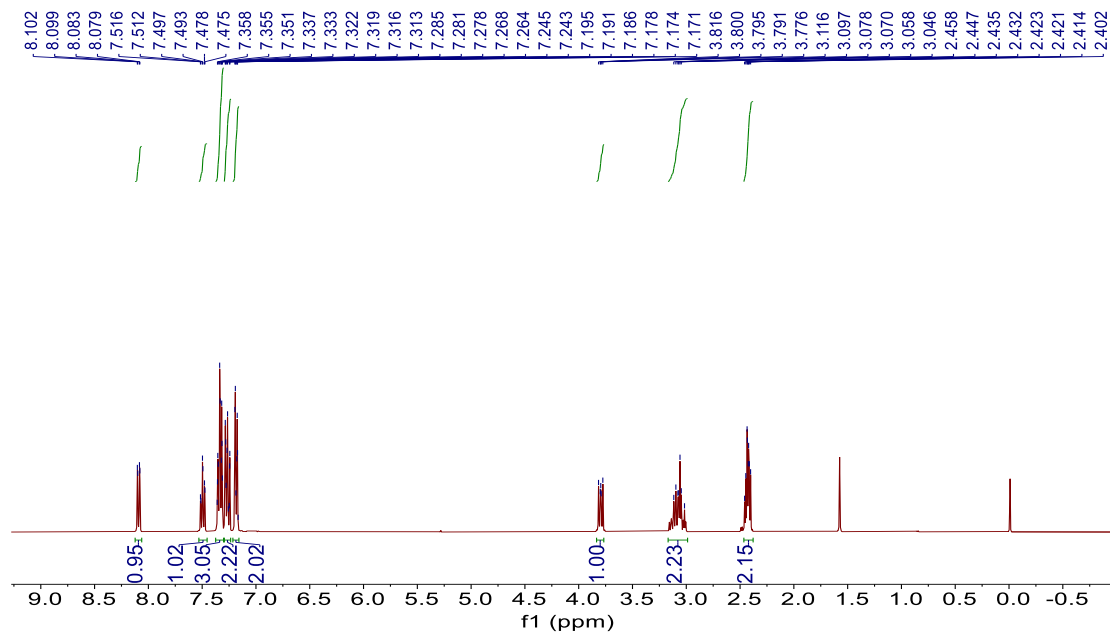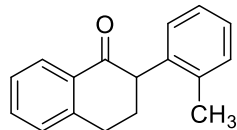

**1b**

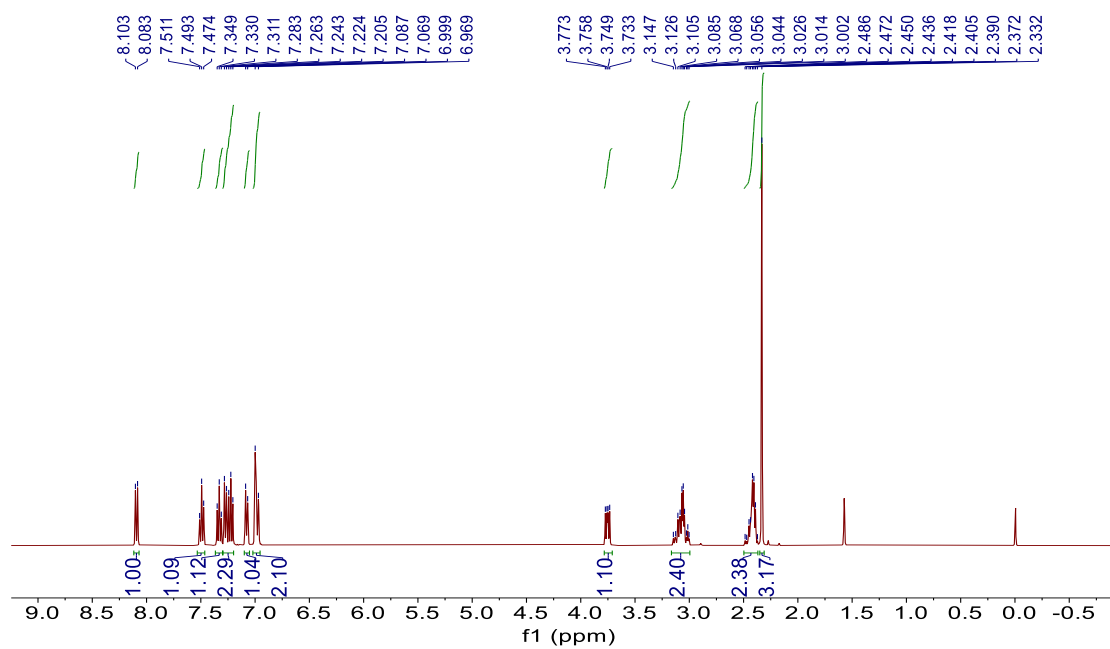

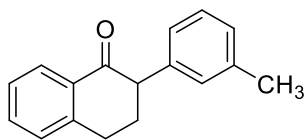

**1c**

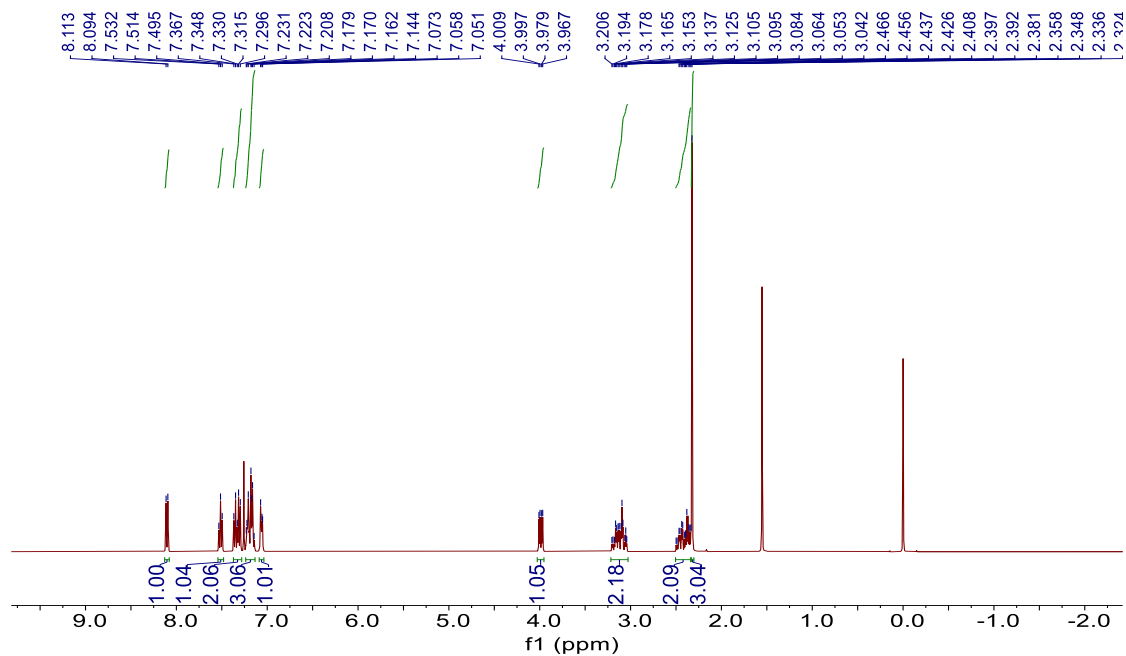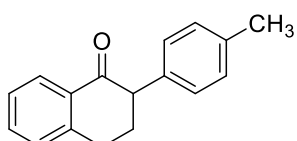

**1d**

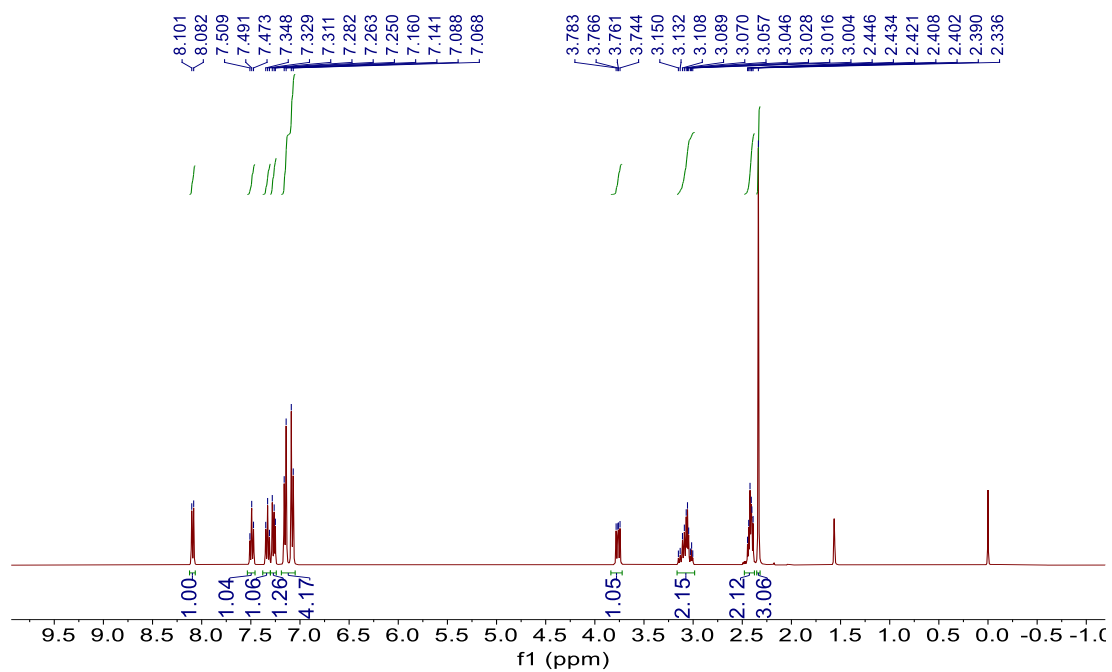

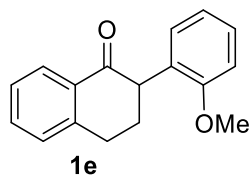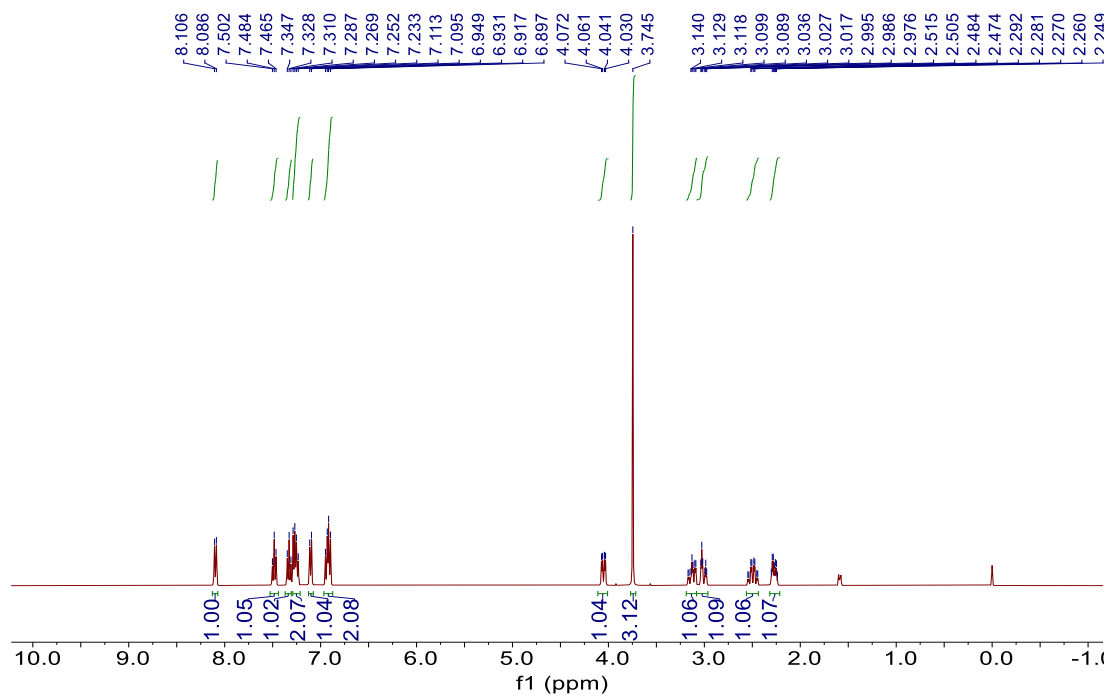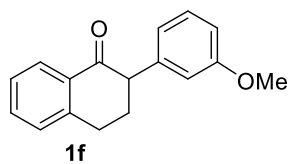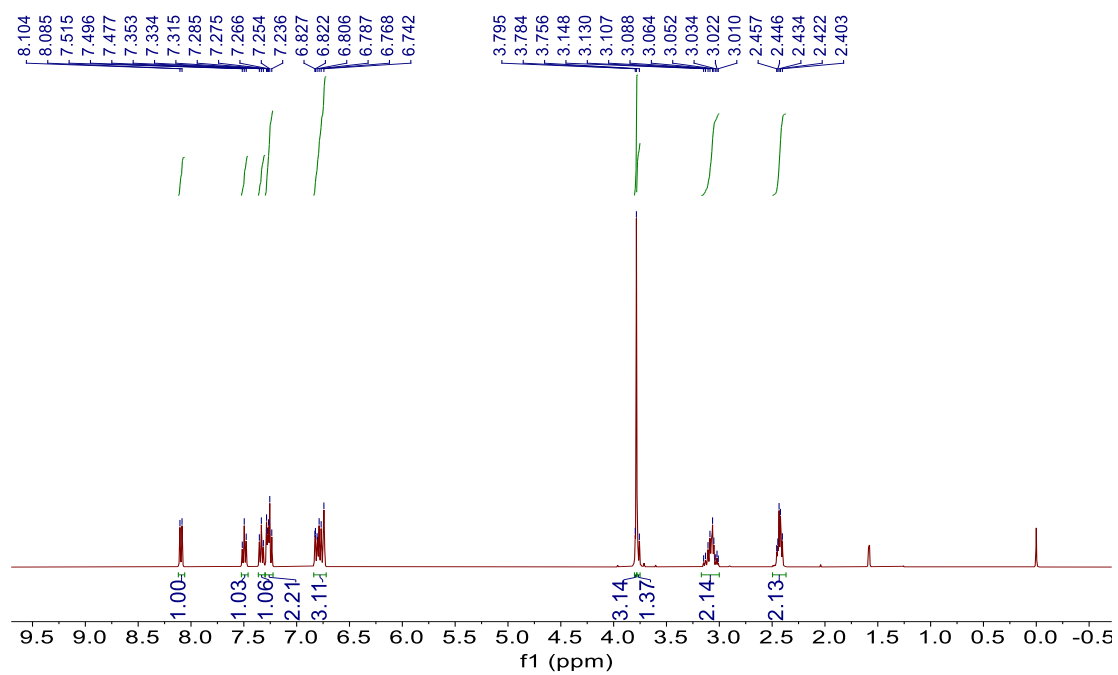

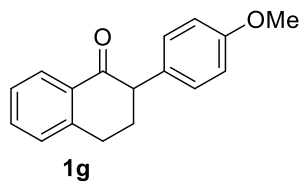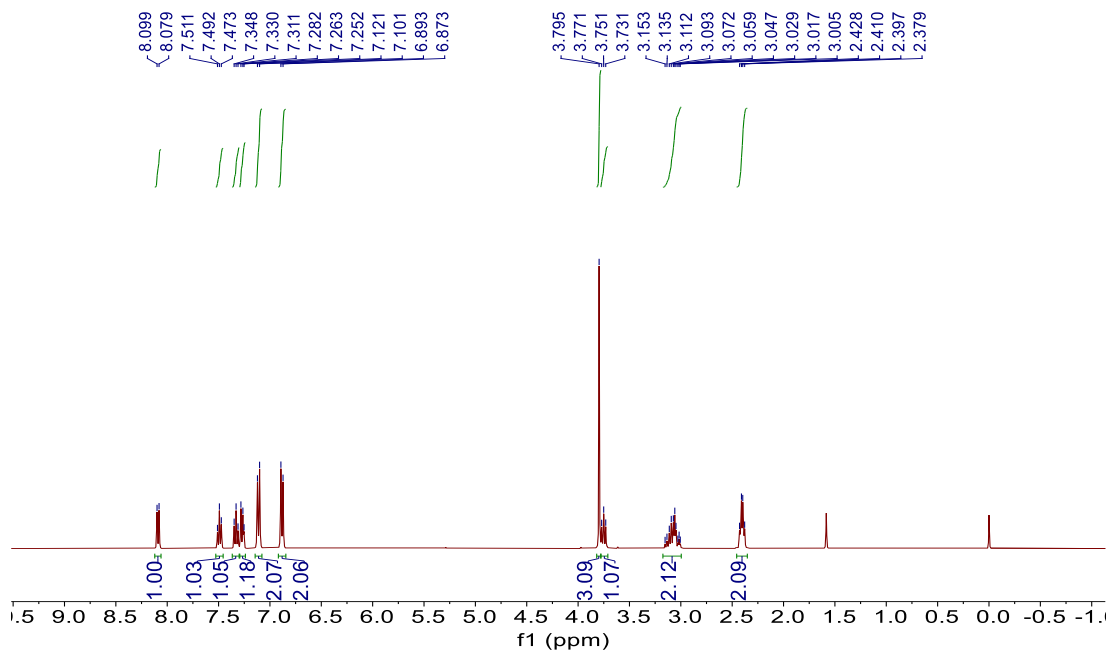

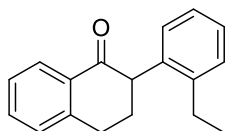

**1h**

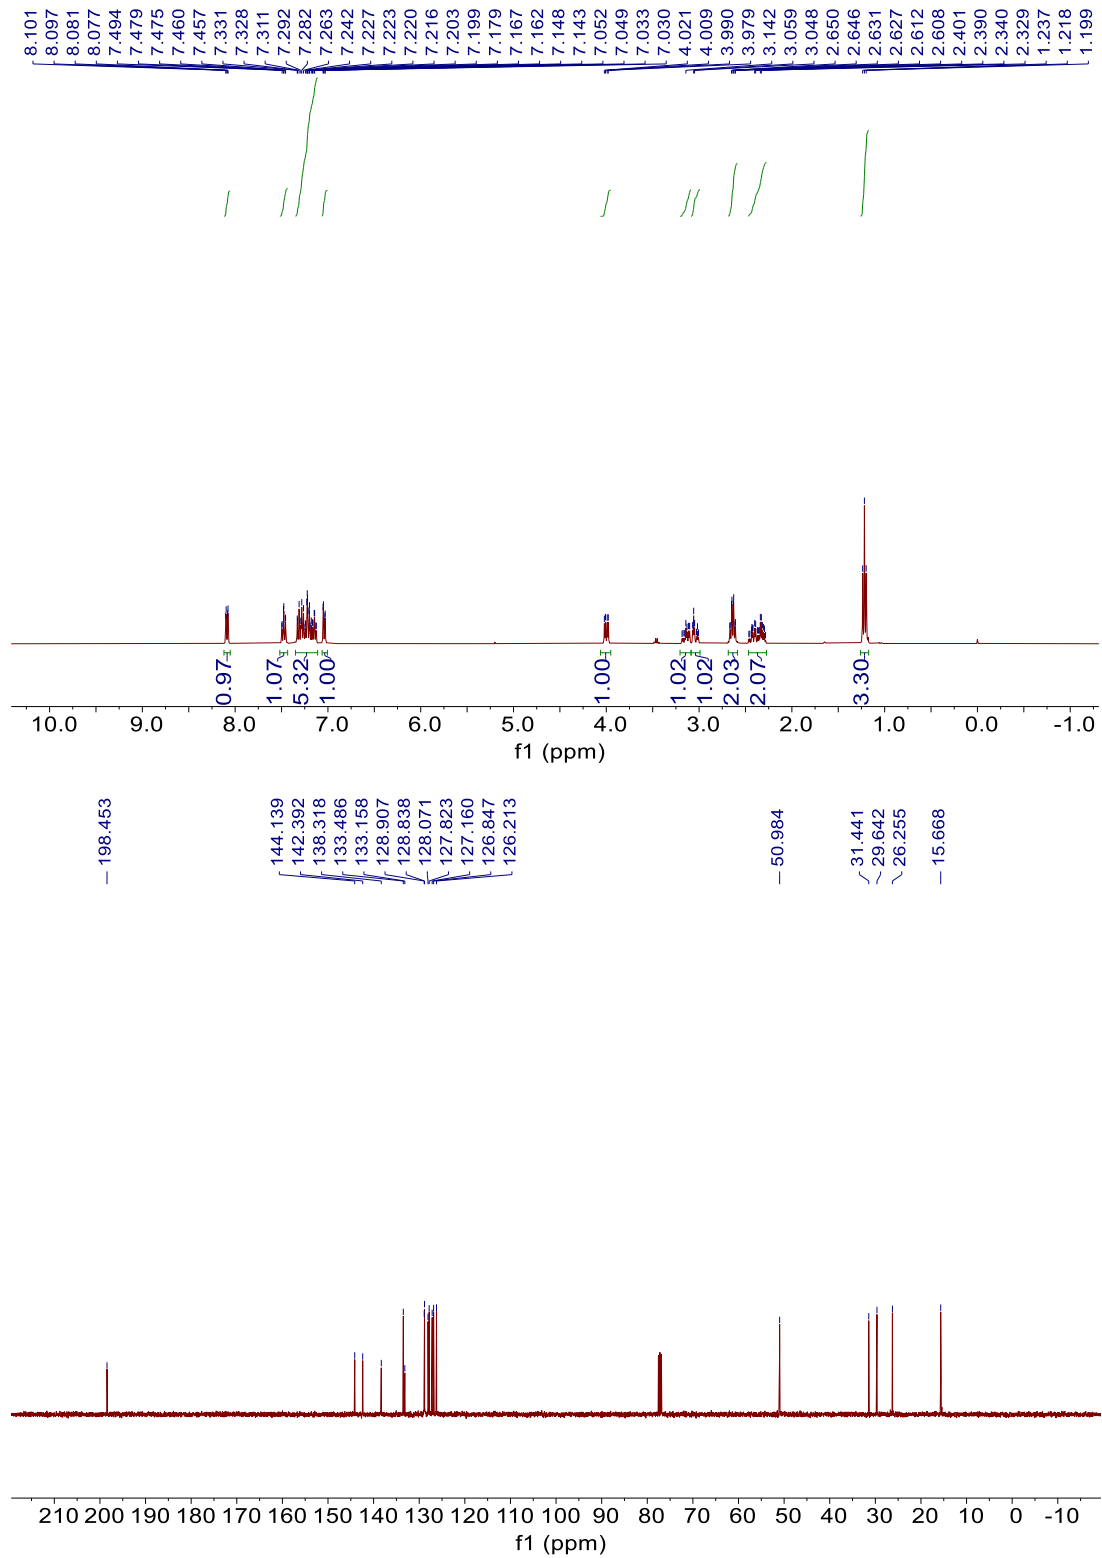



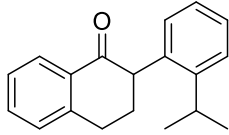

**1i**

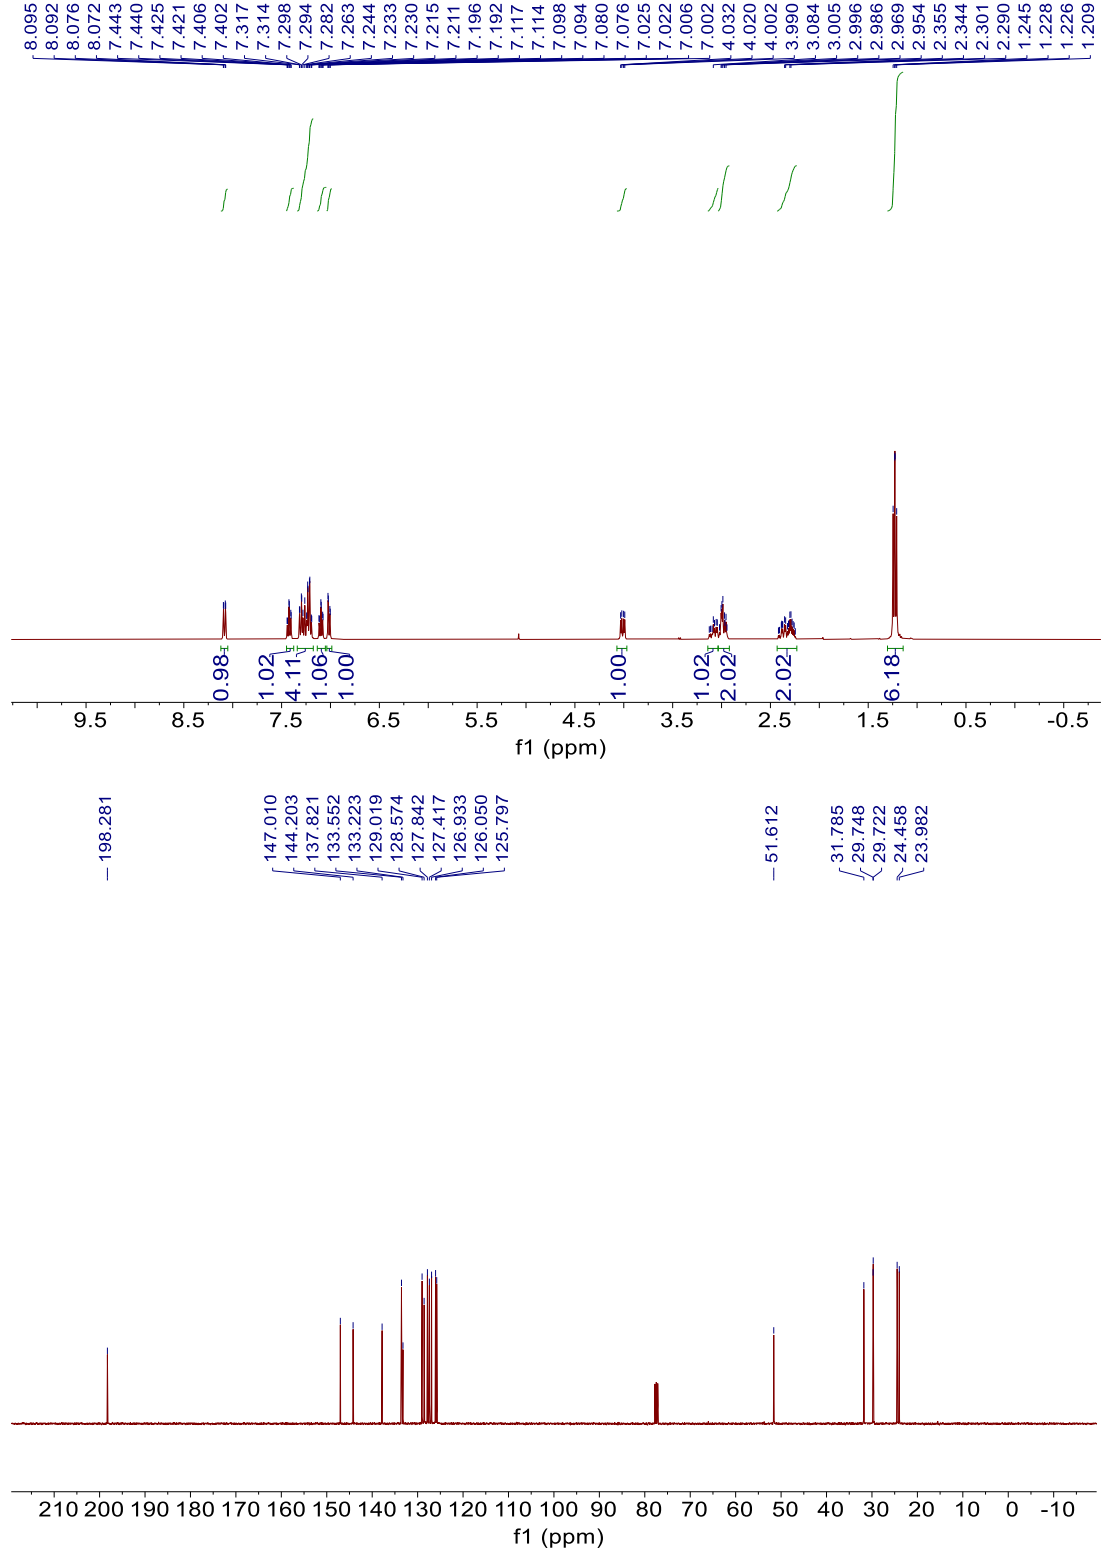

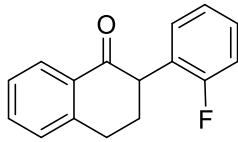

1j

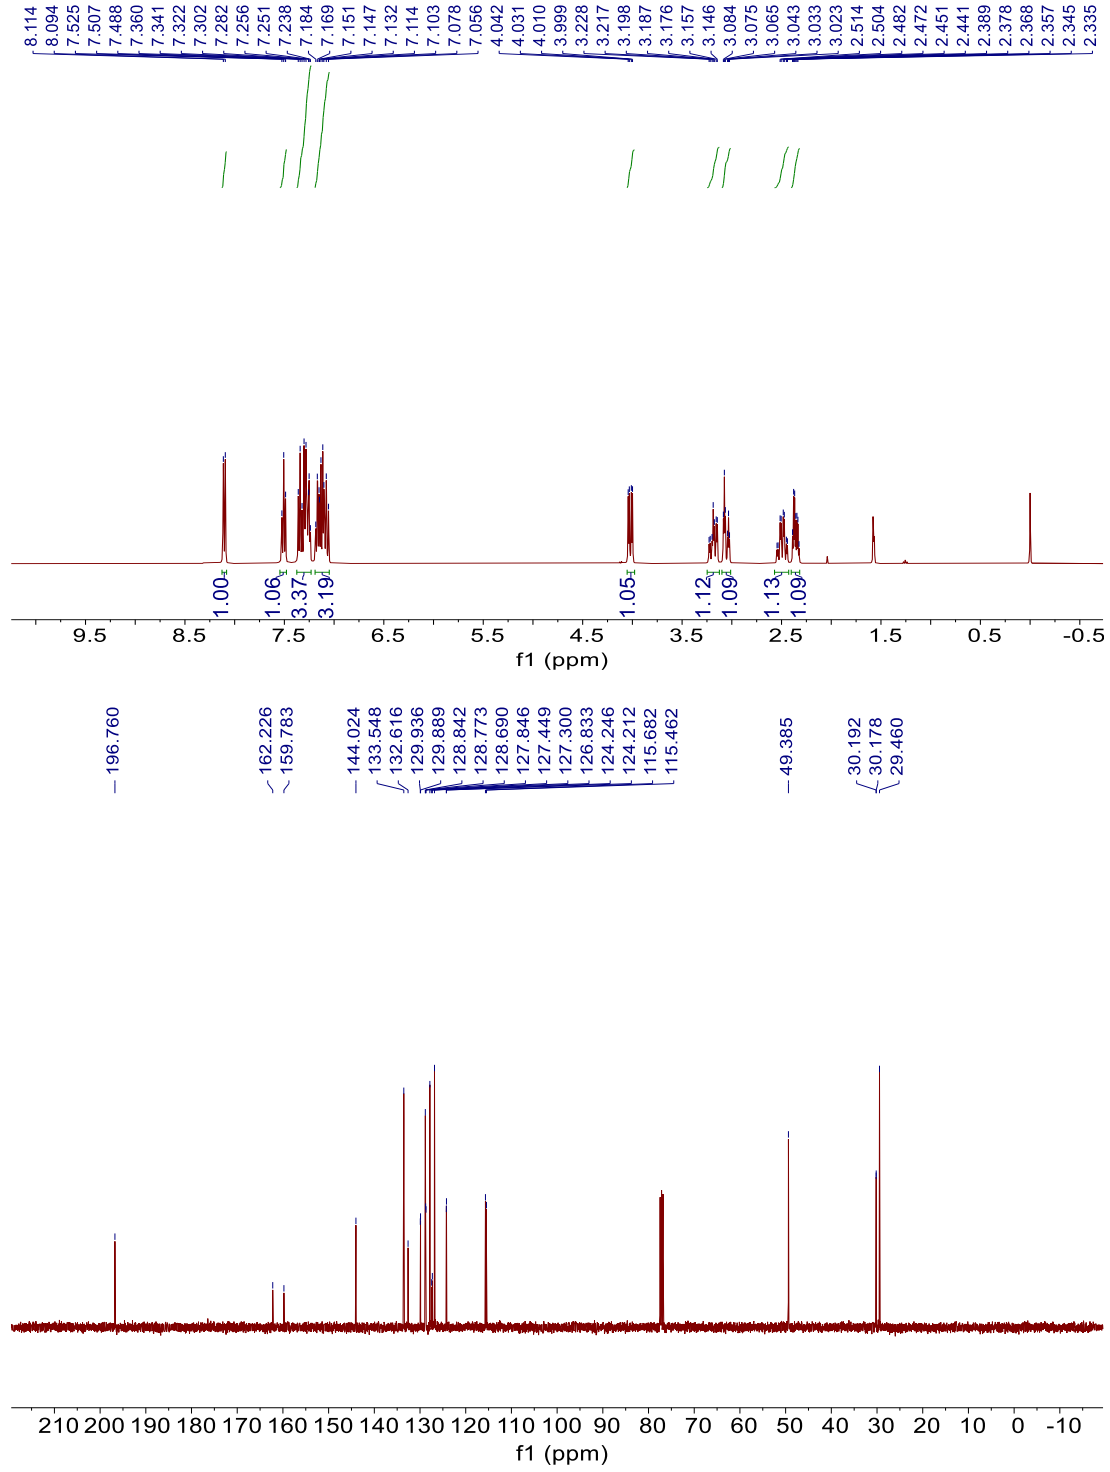

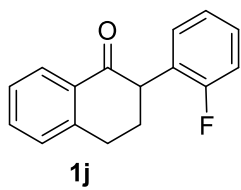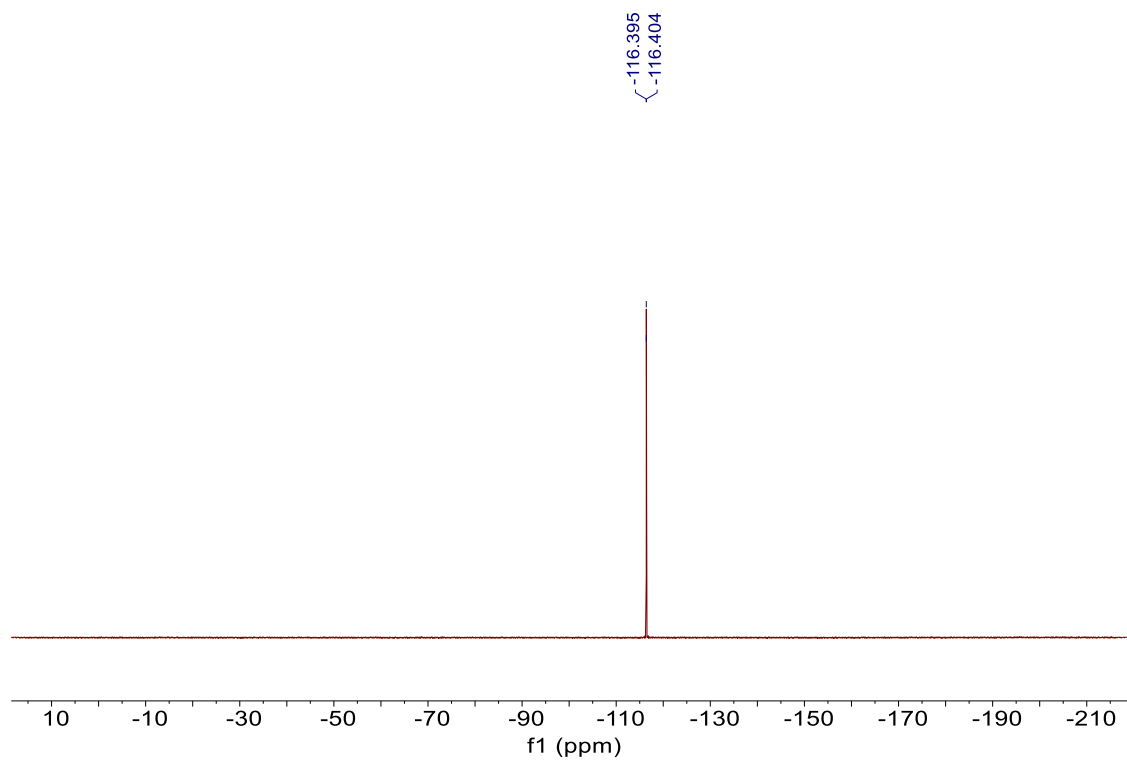

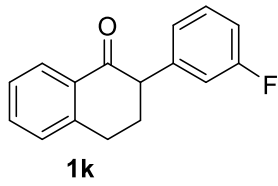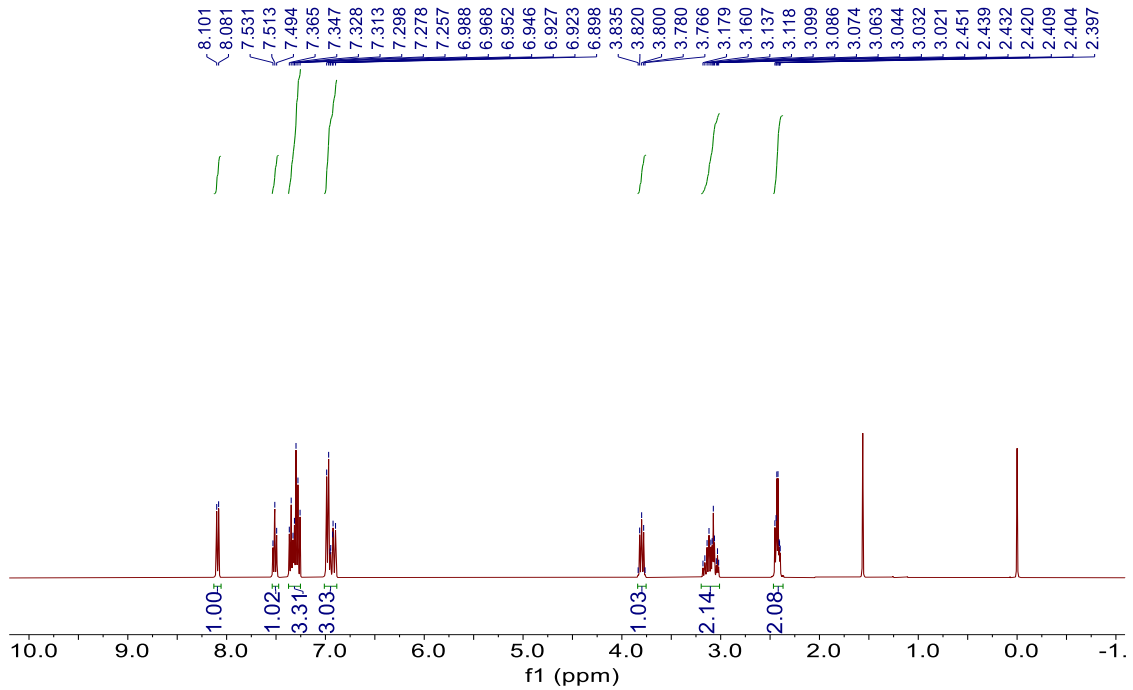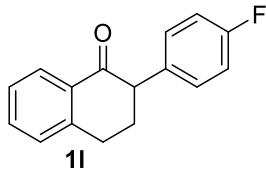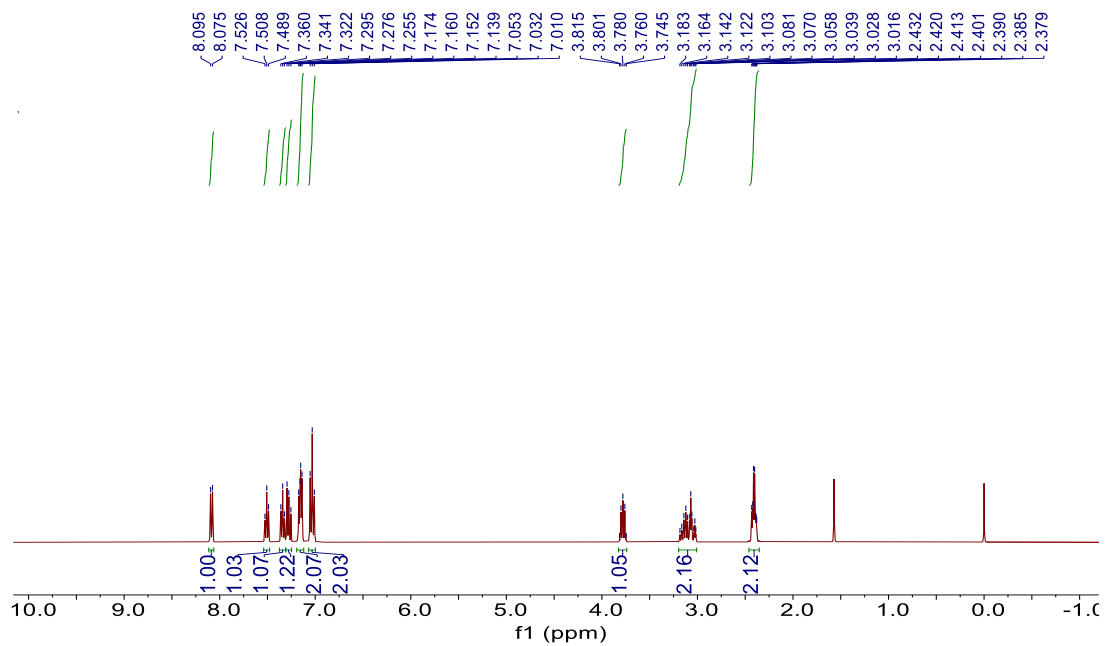

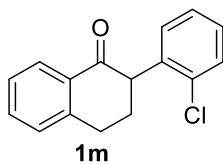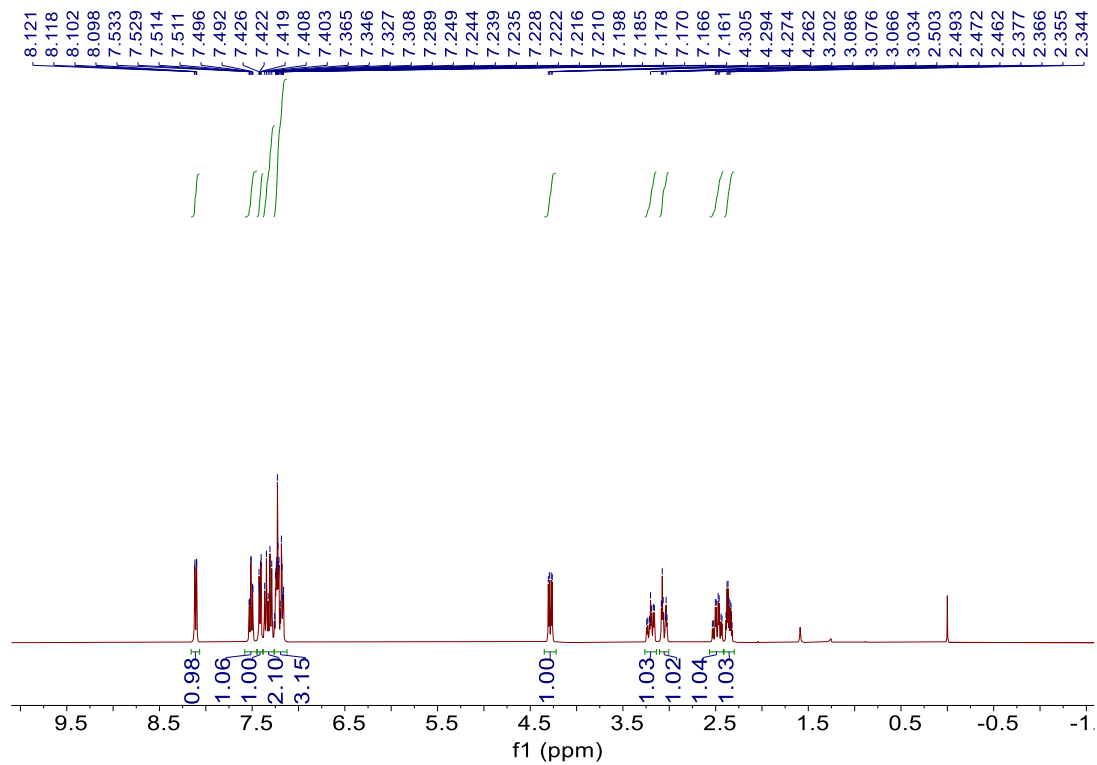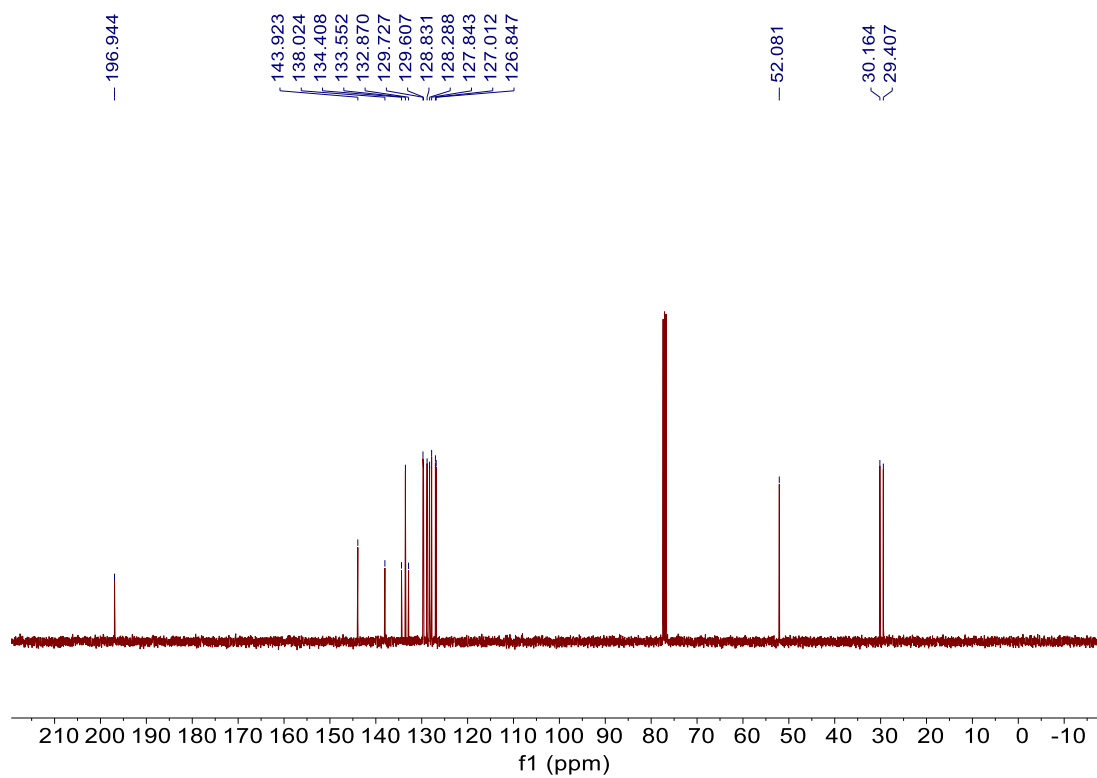

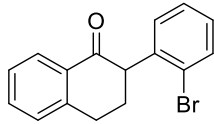

**1n**

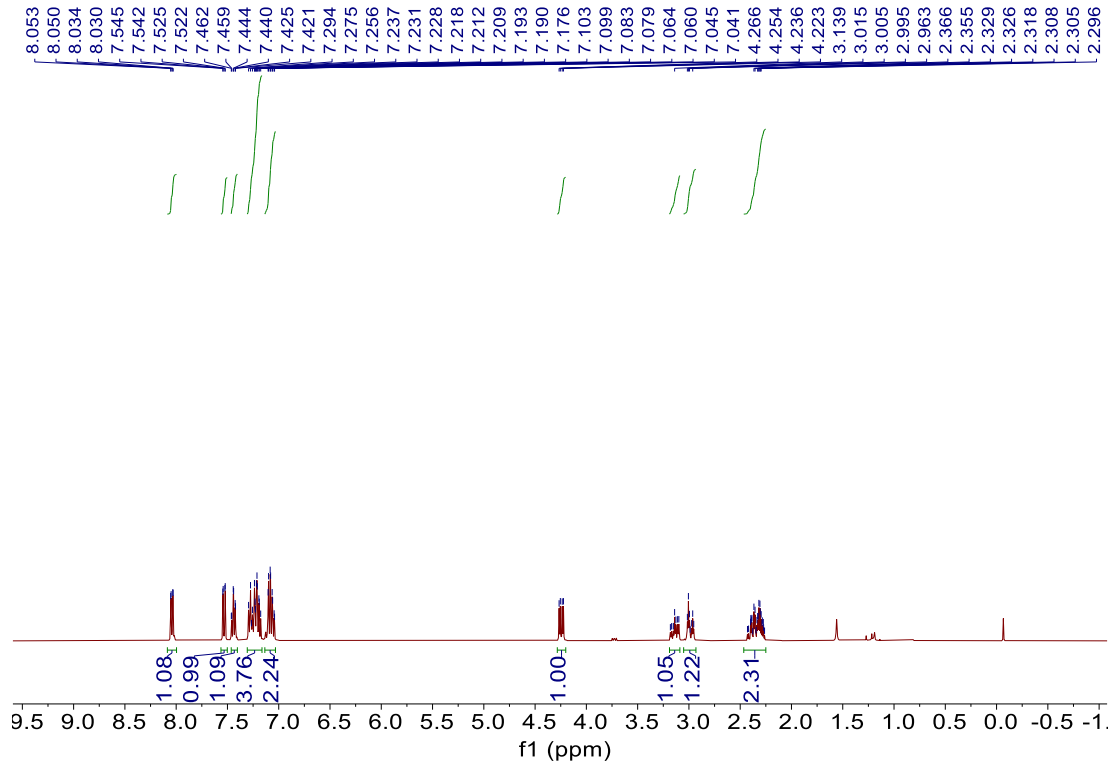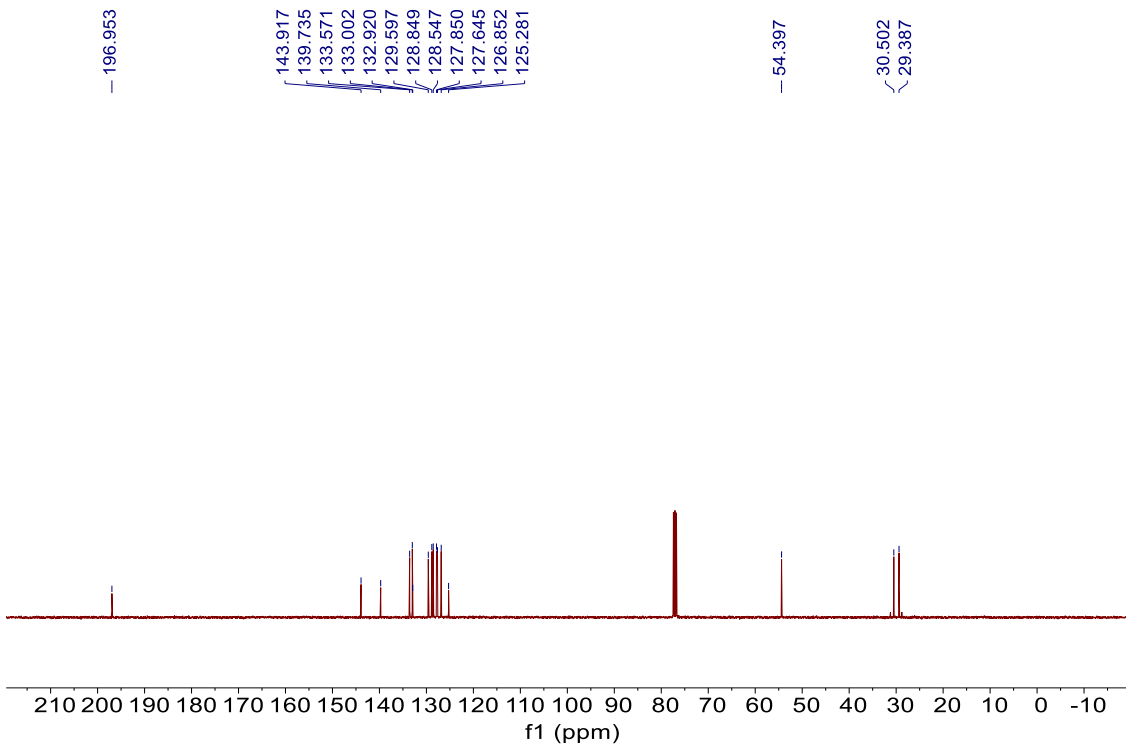

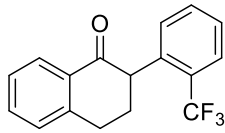

**1o**

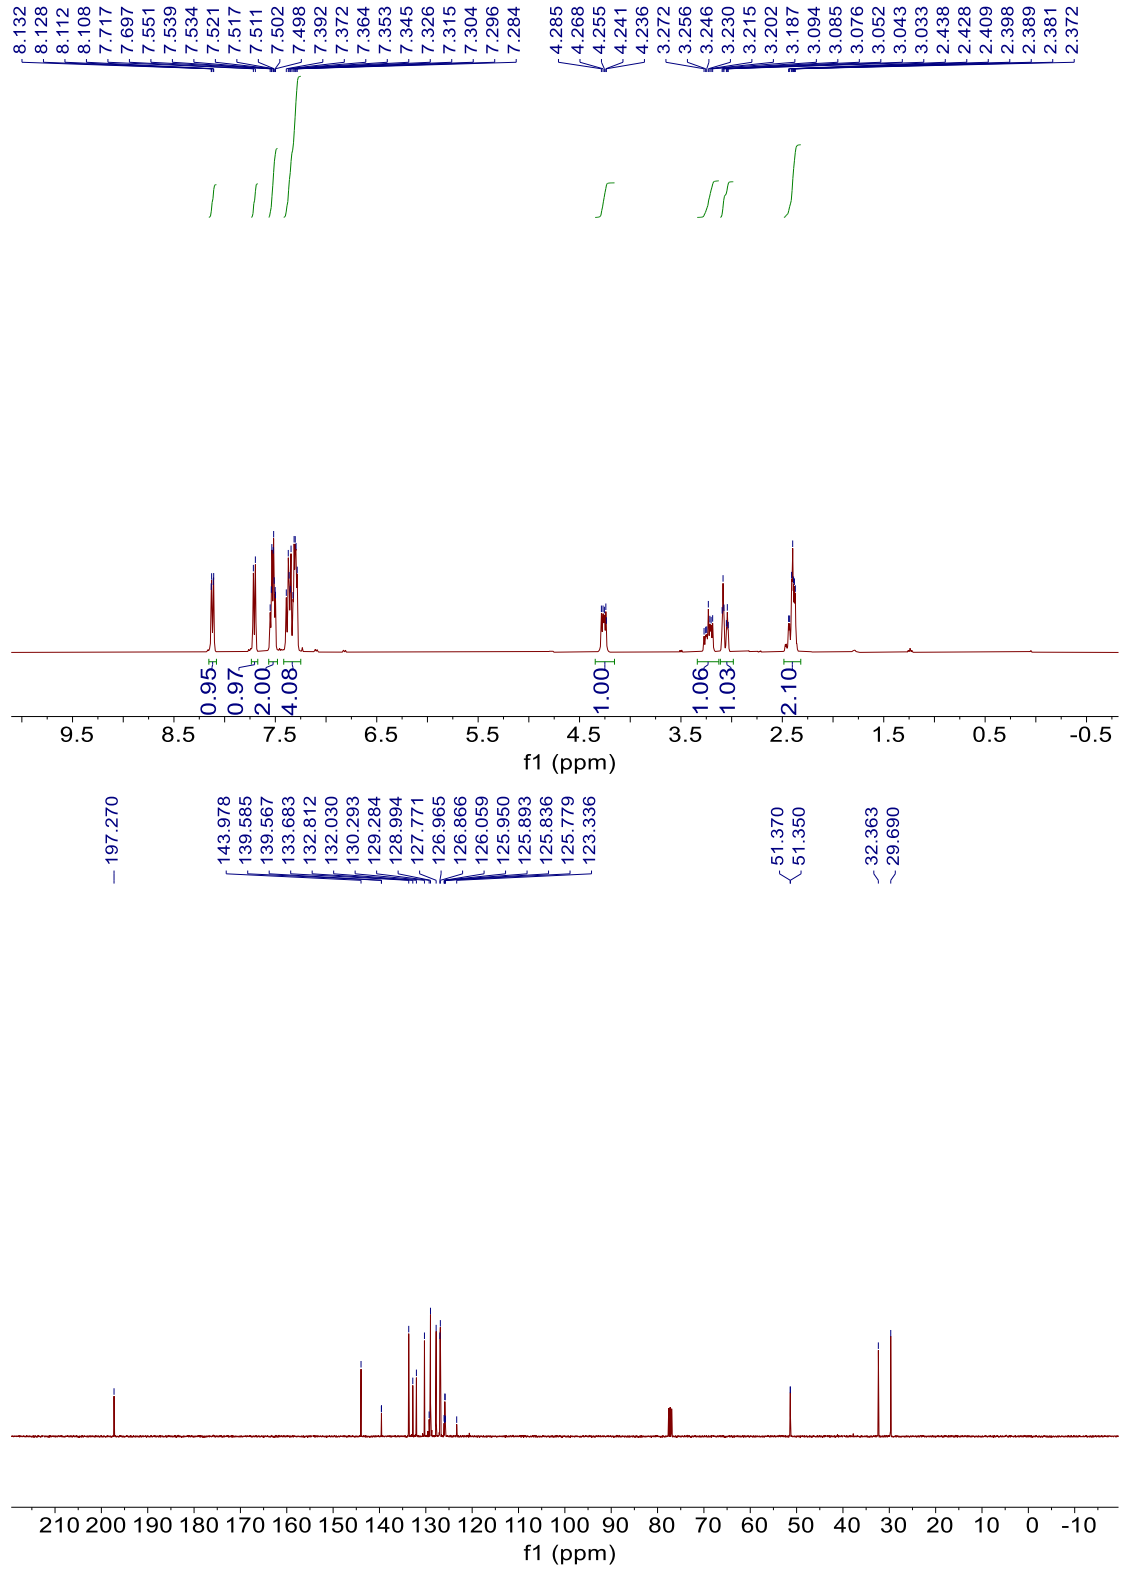

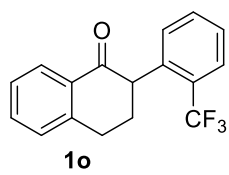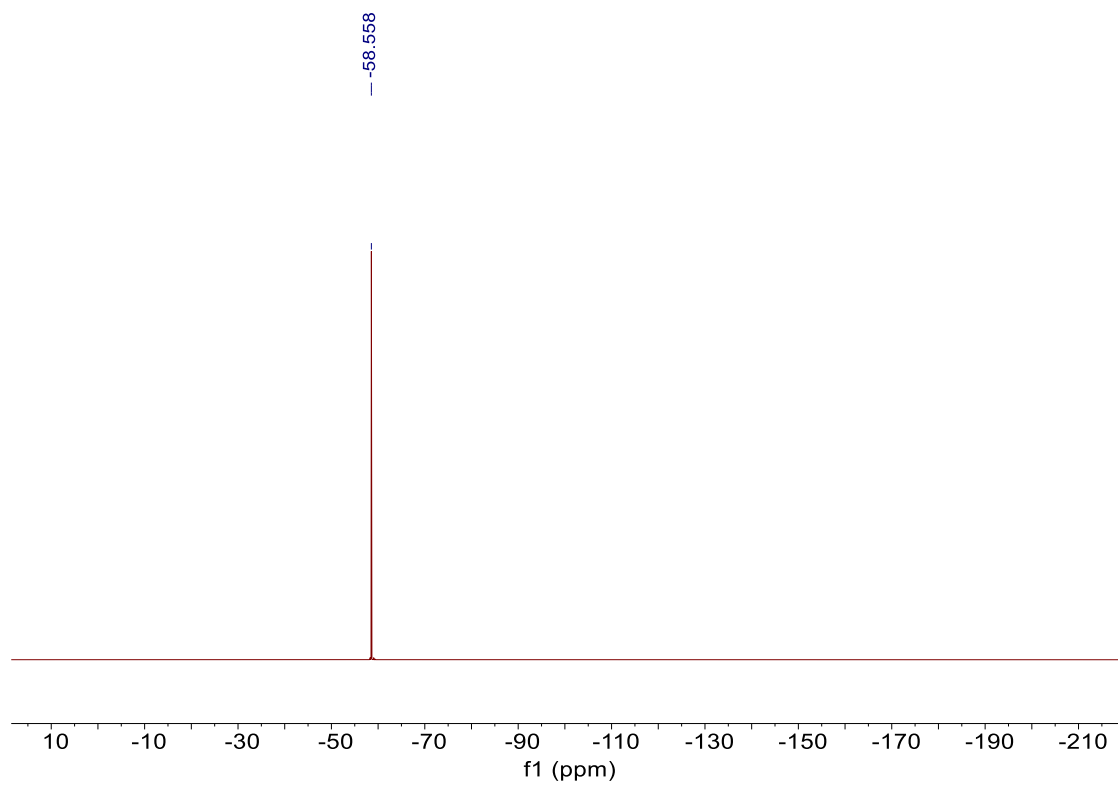



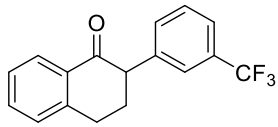

**1p**

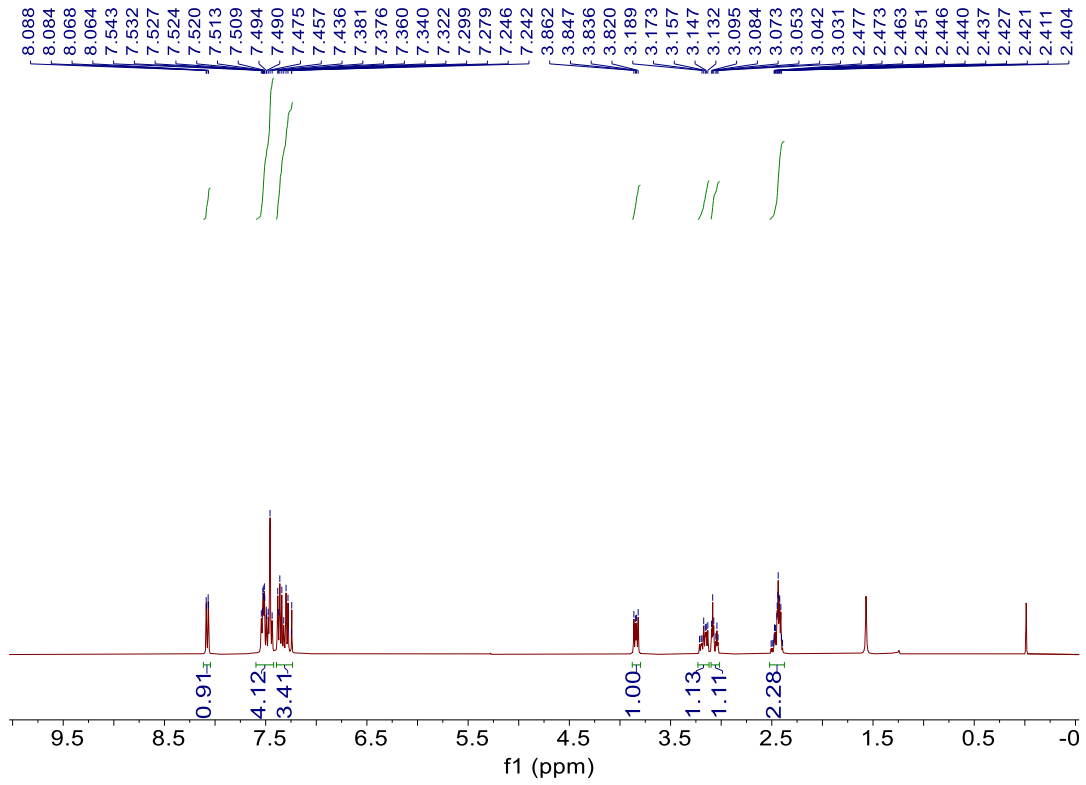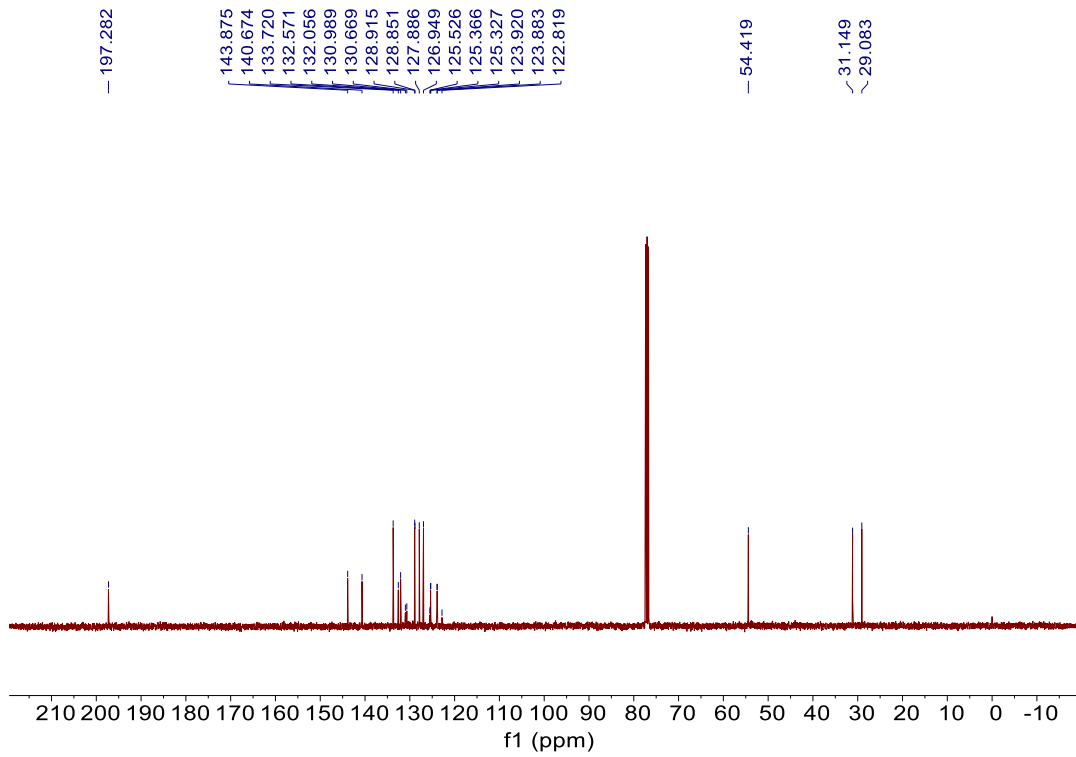

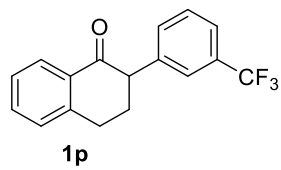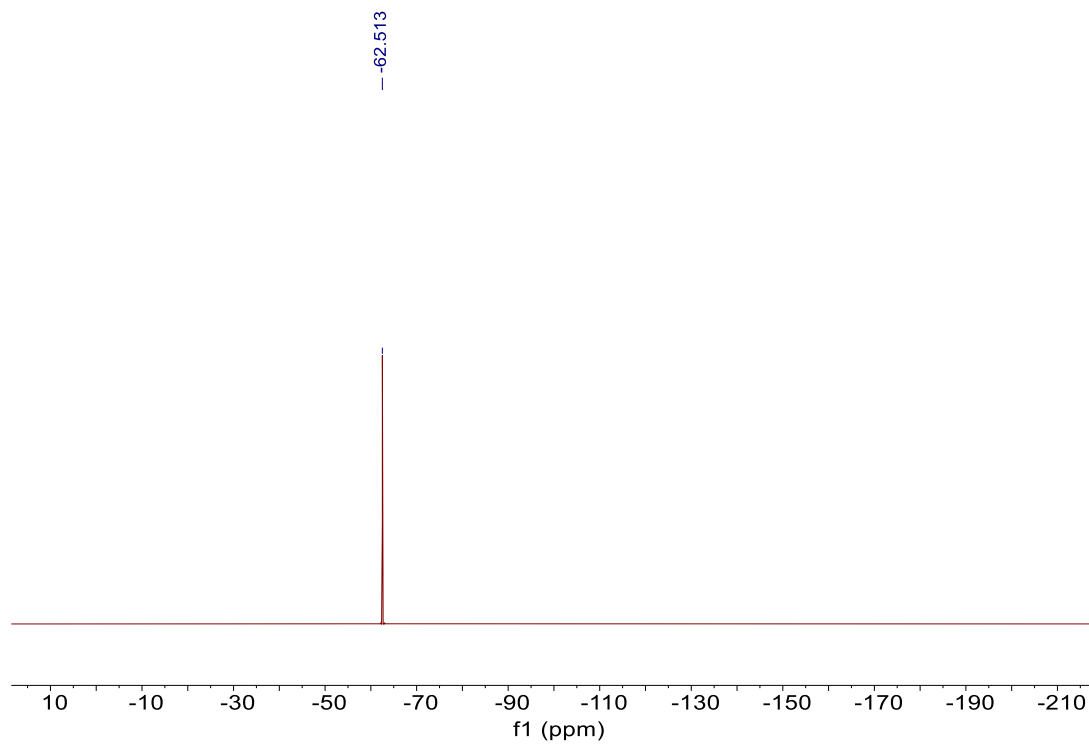

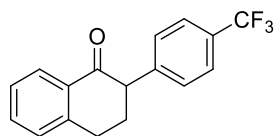

**1q**

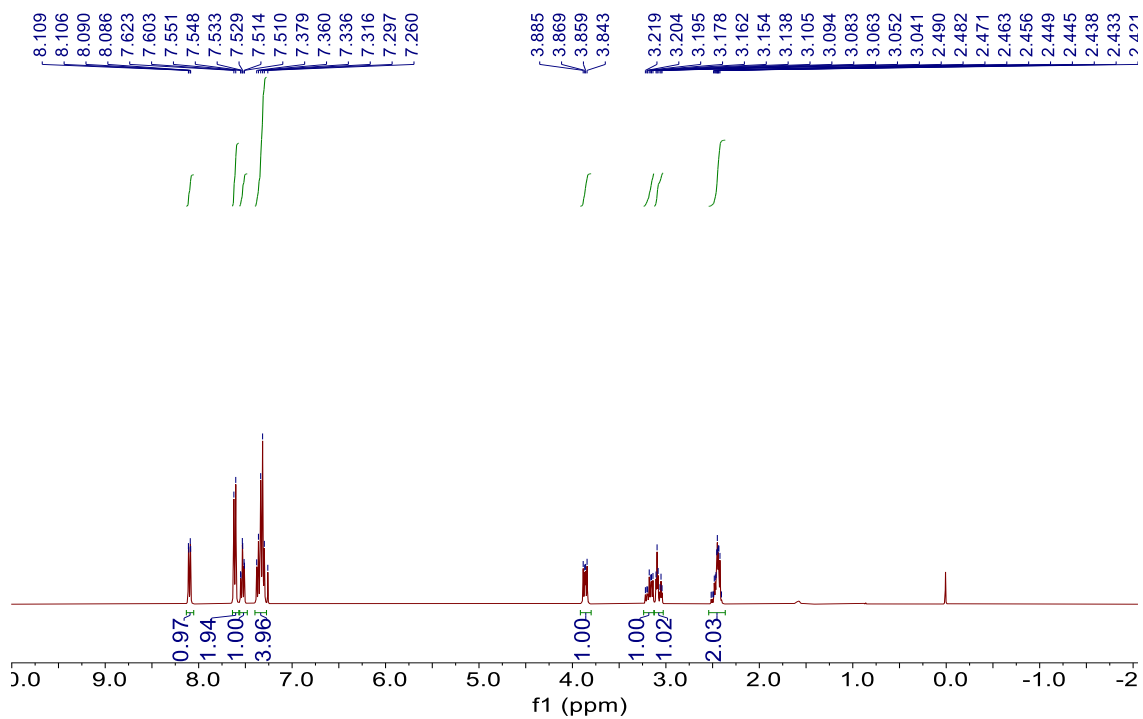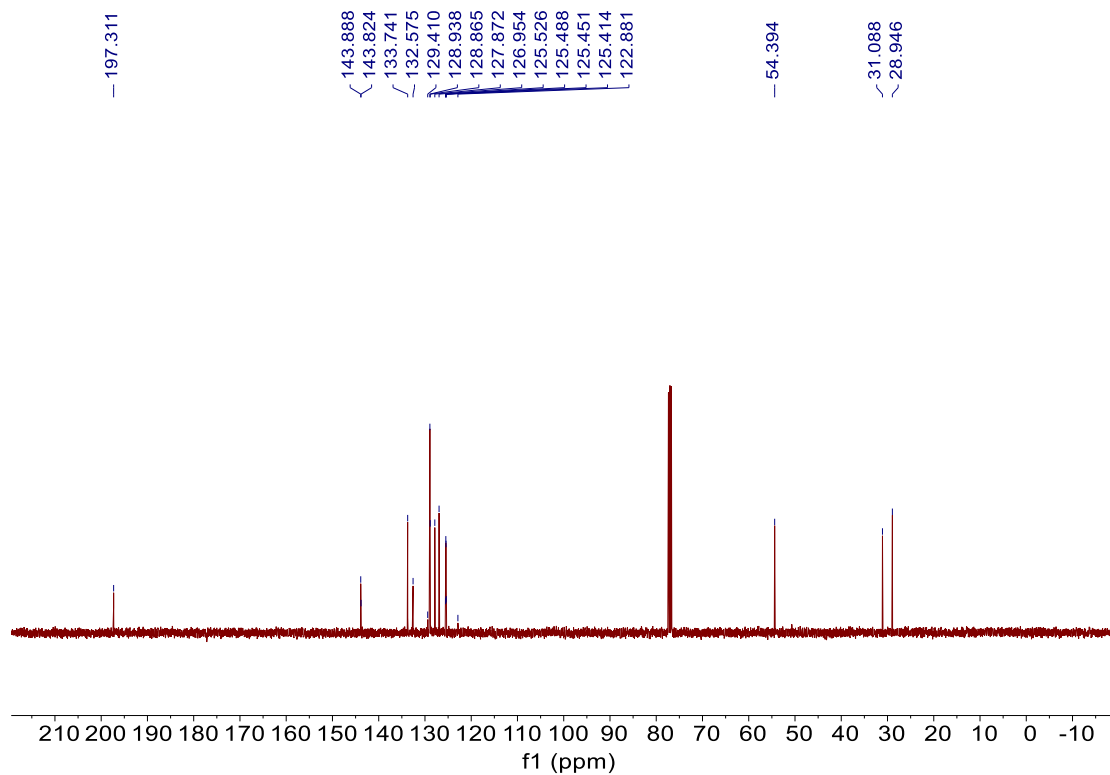

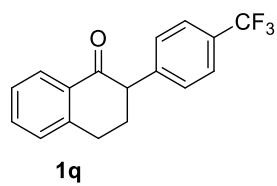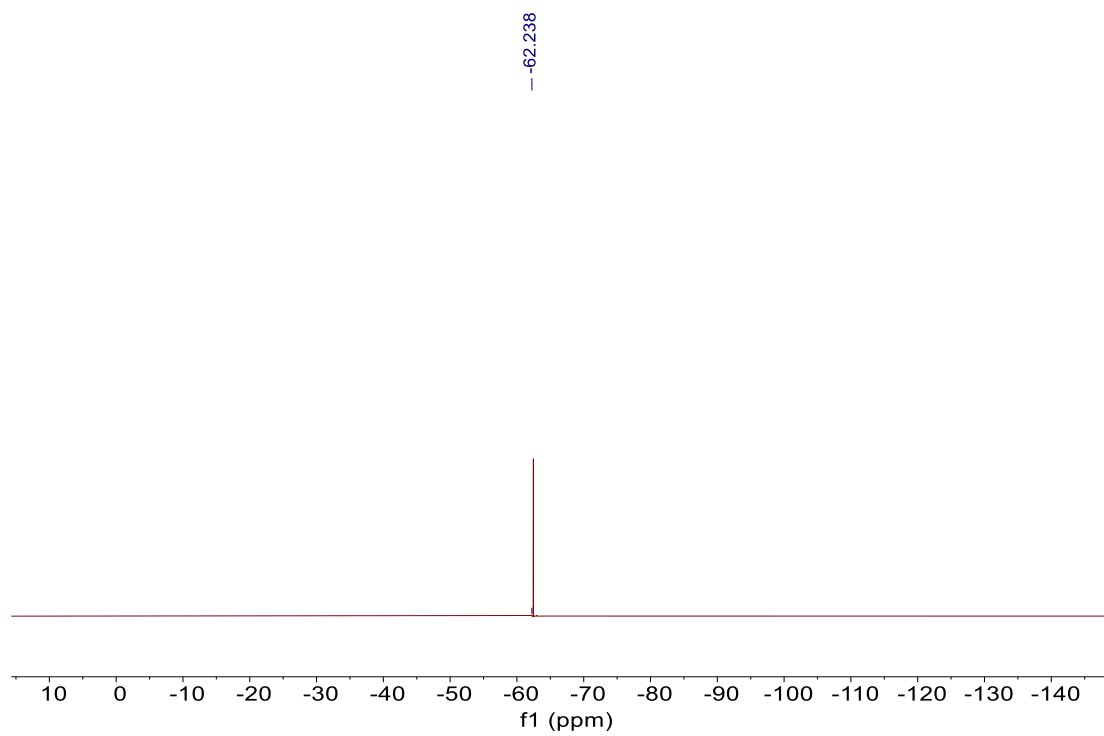

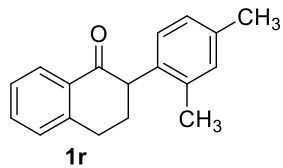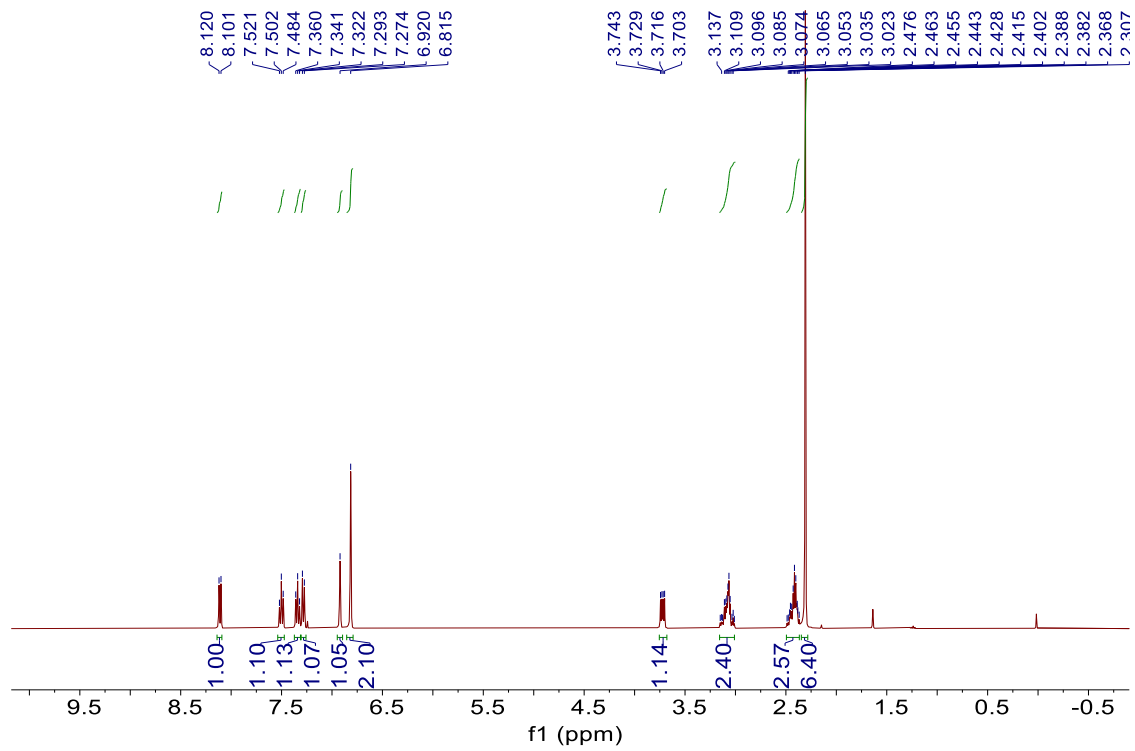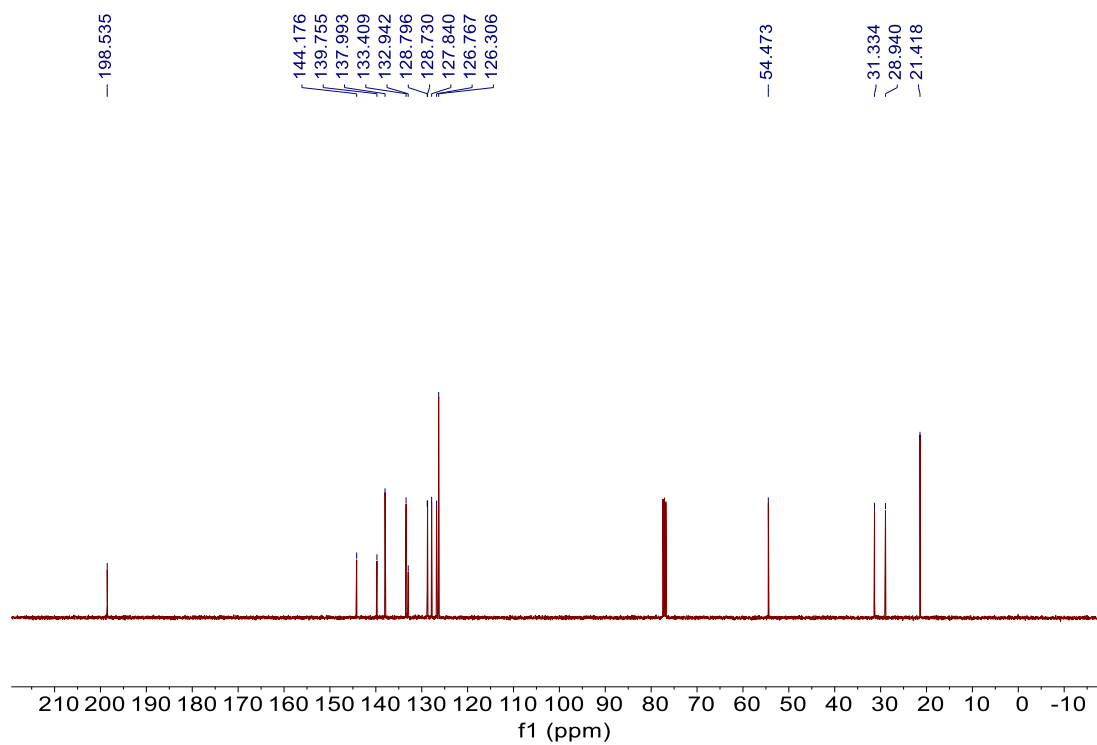

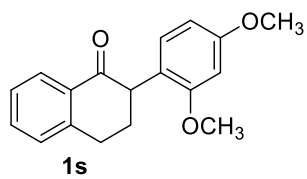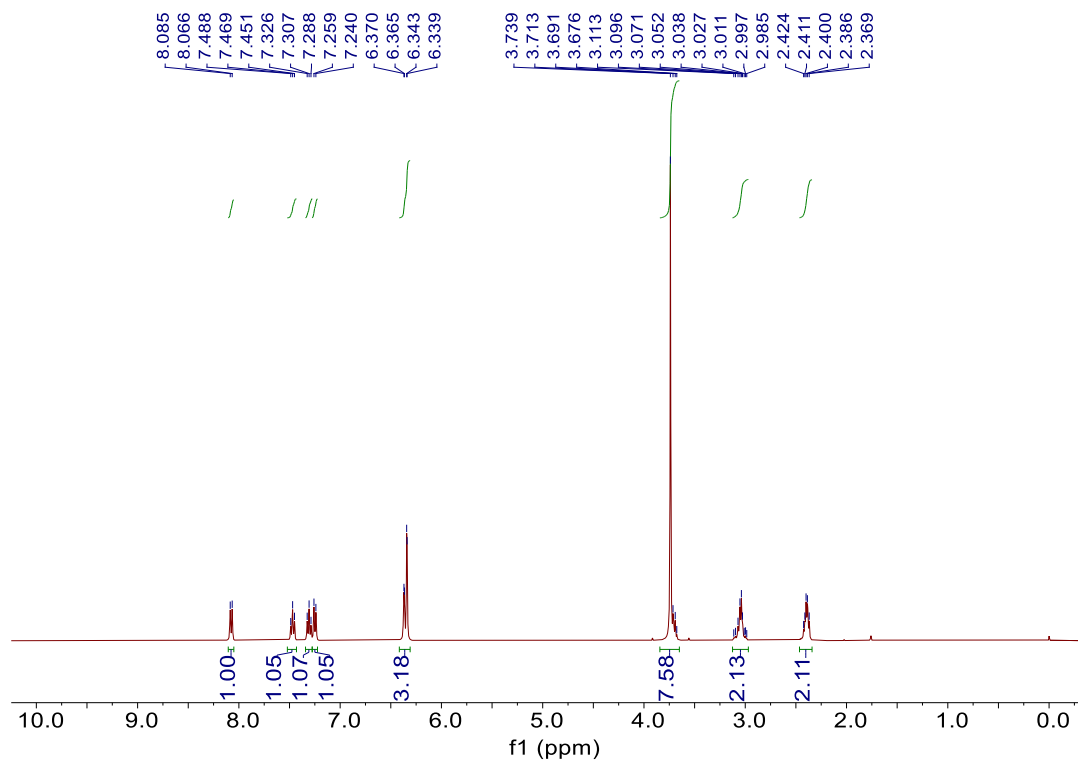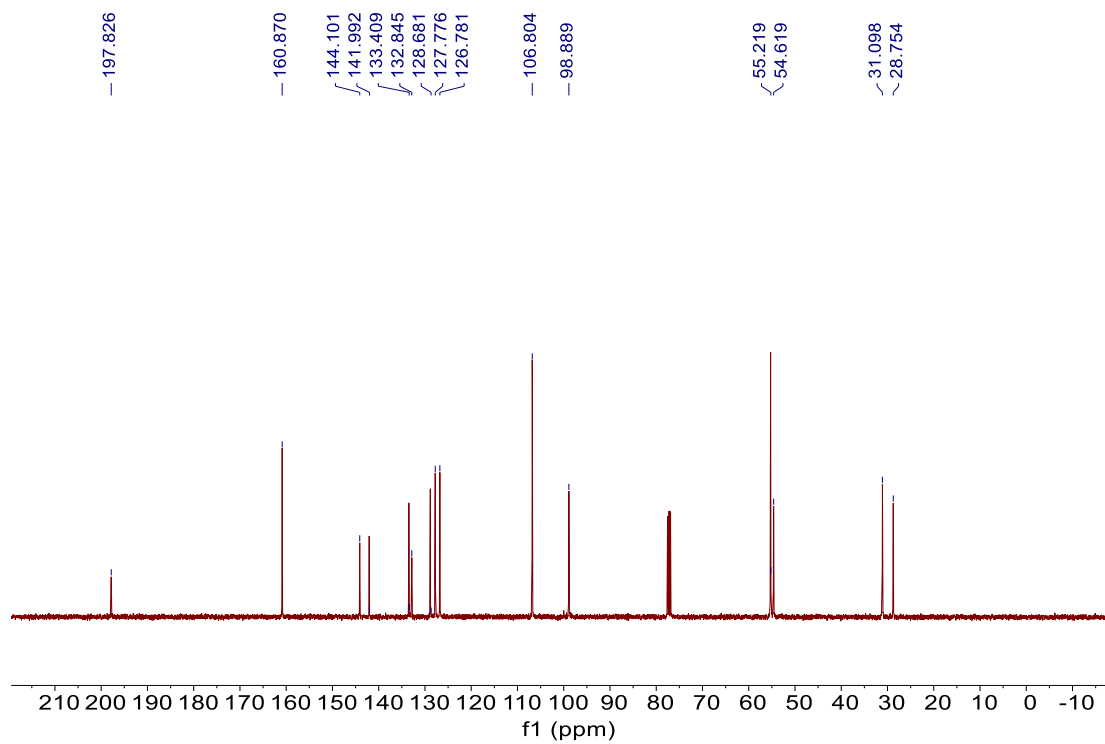

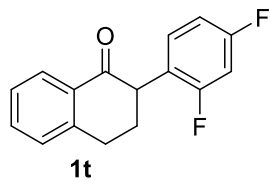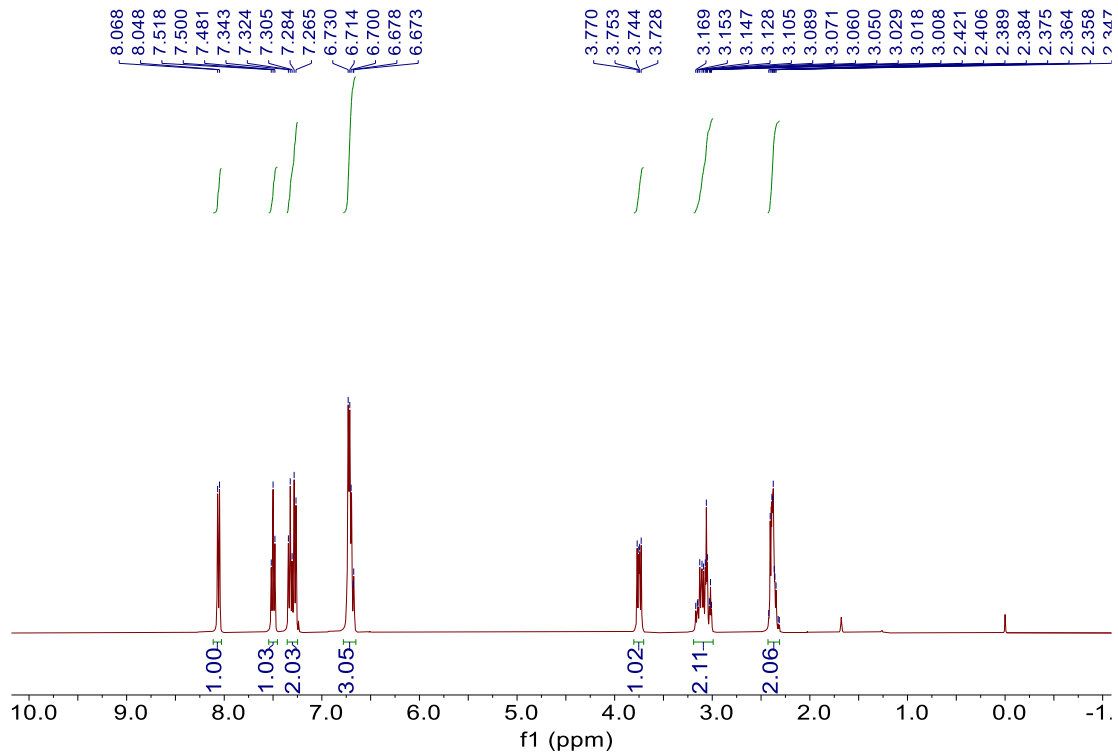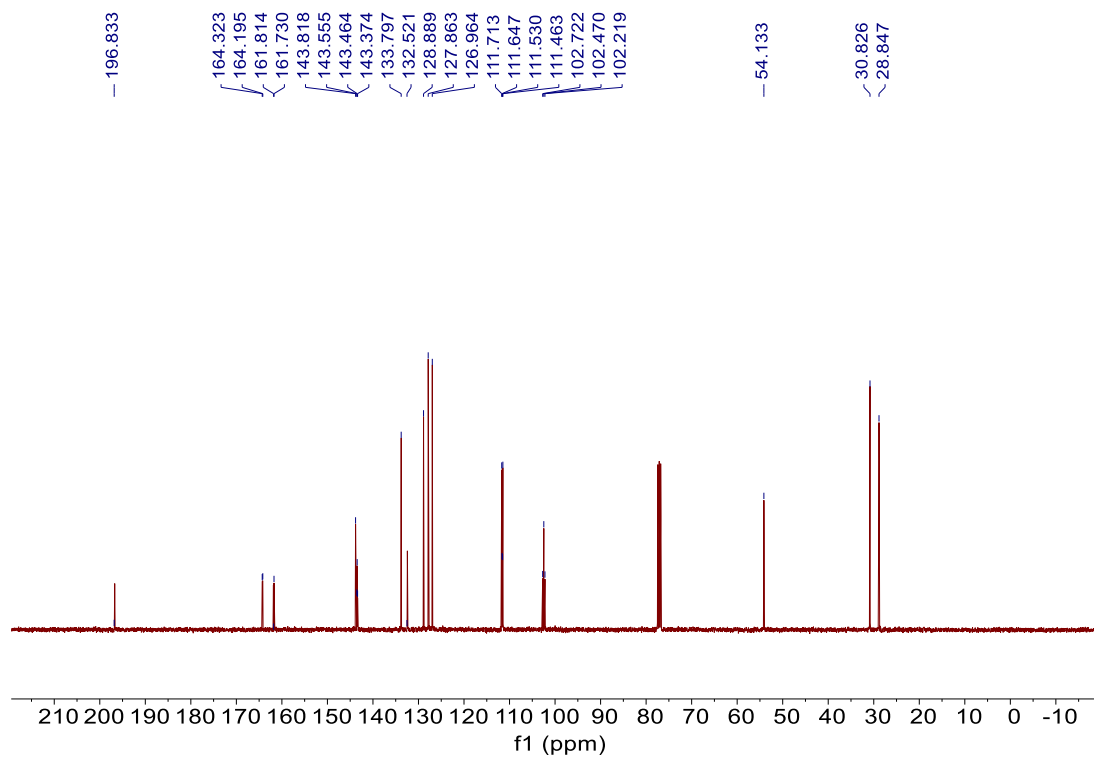

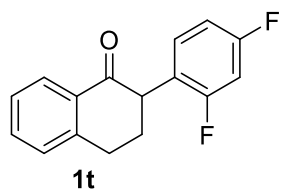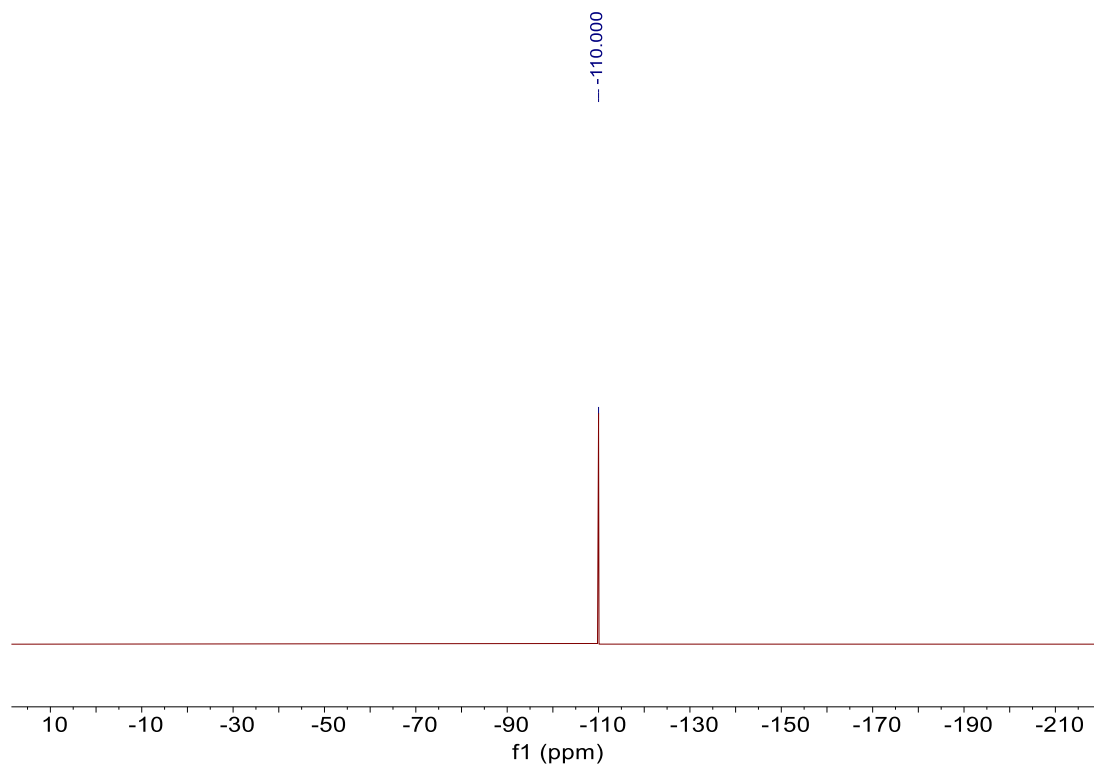



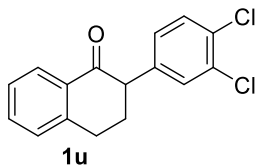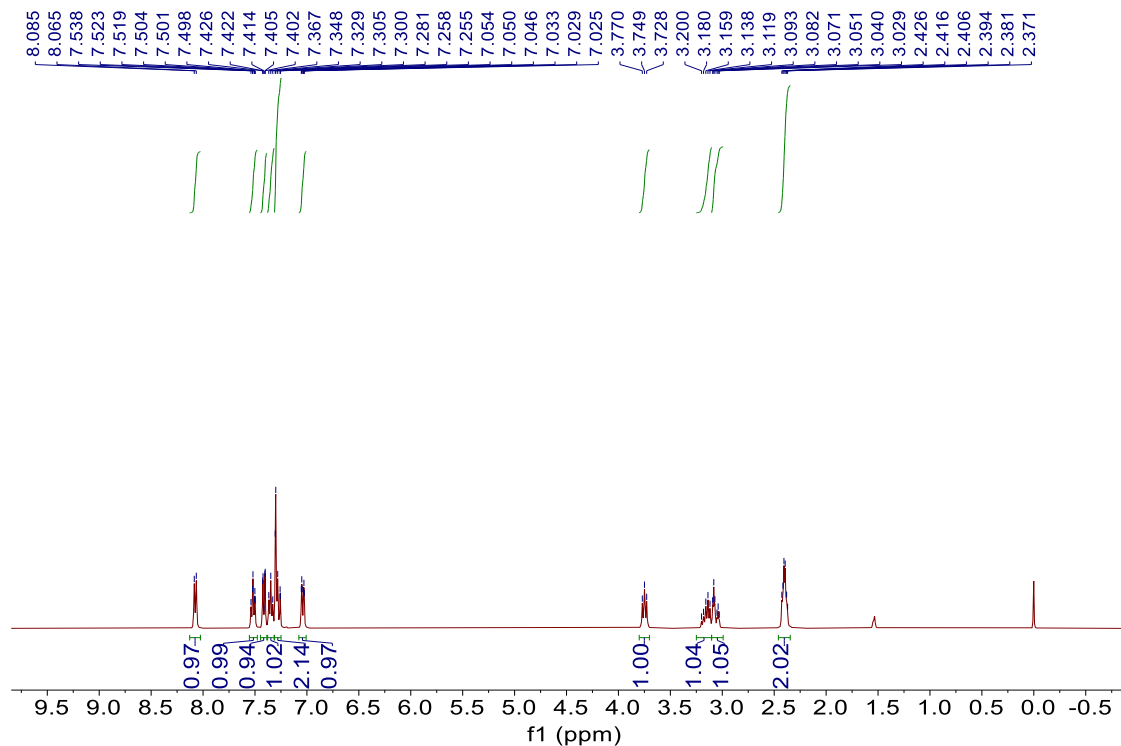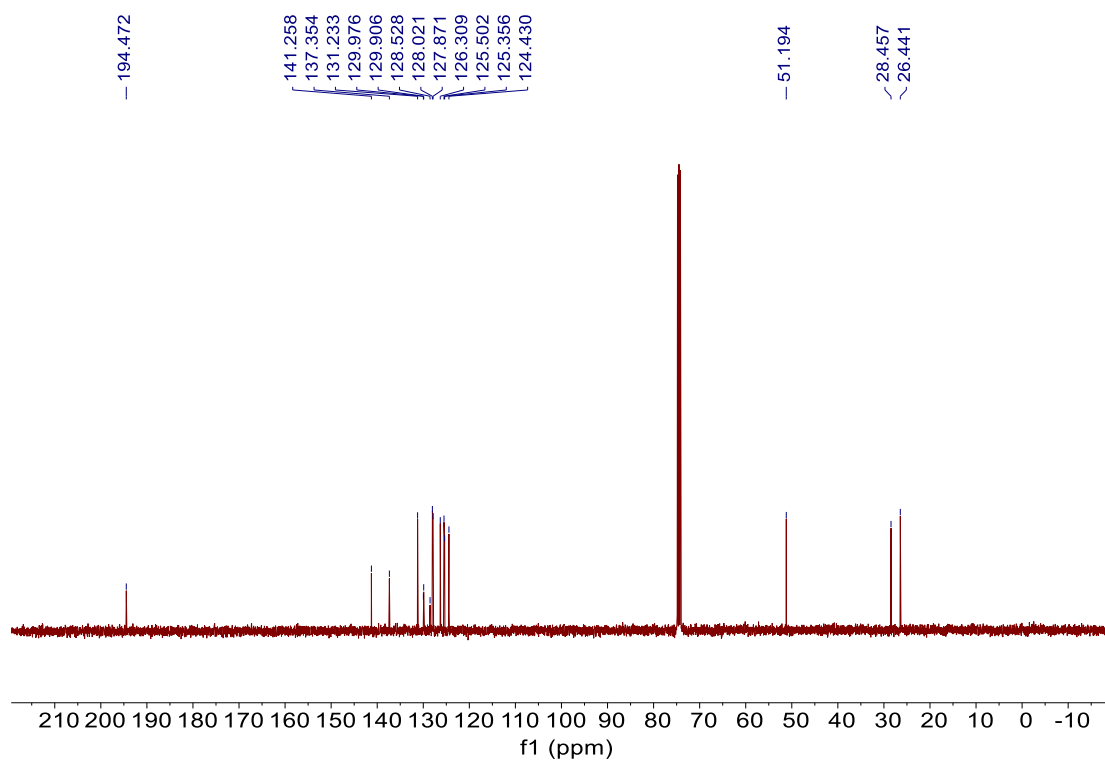

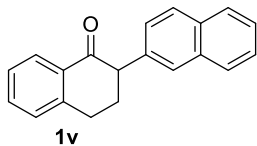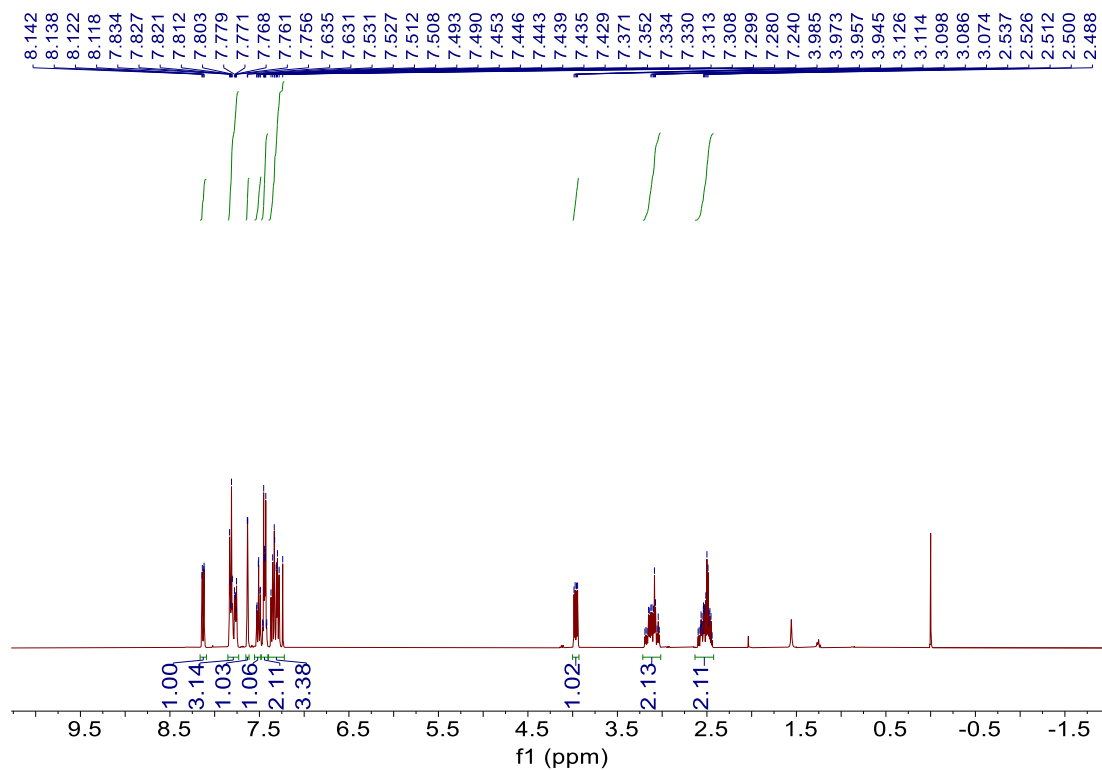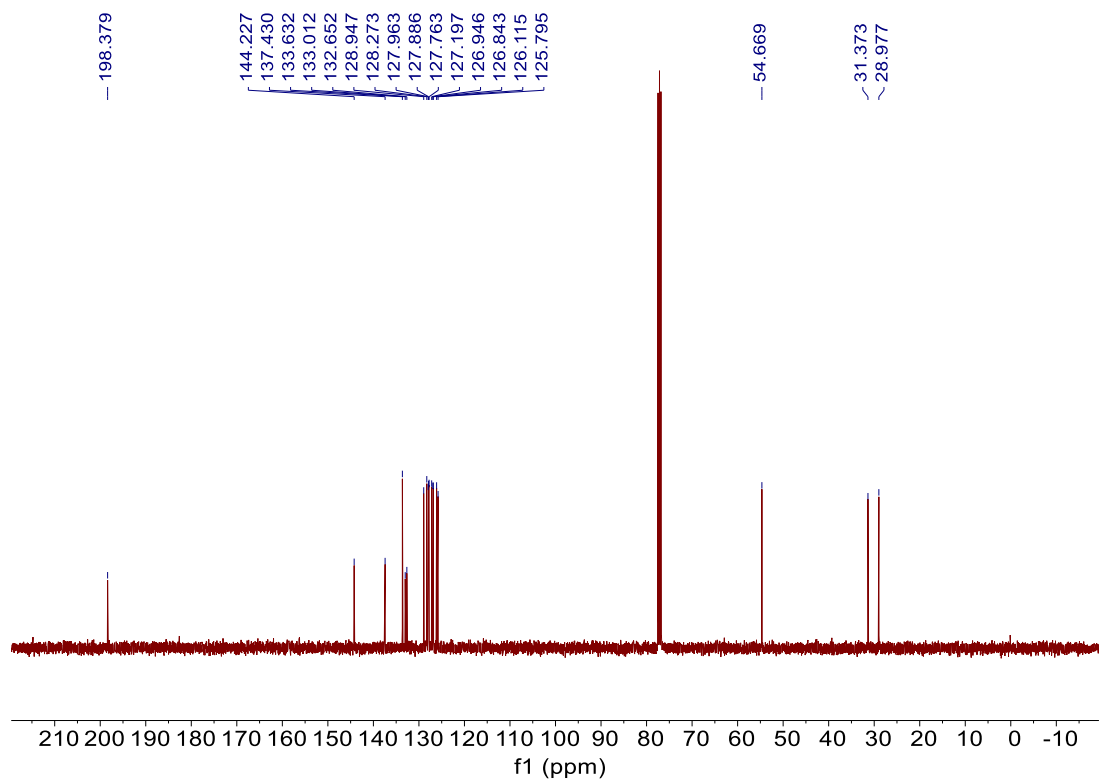

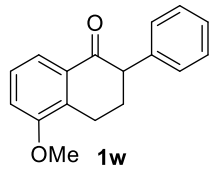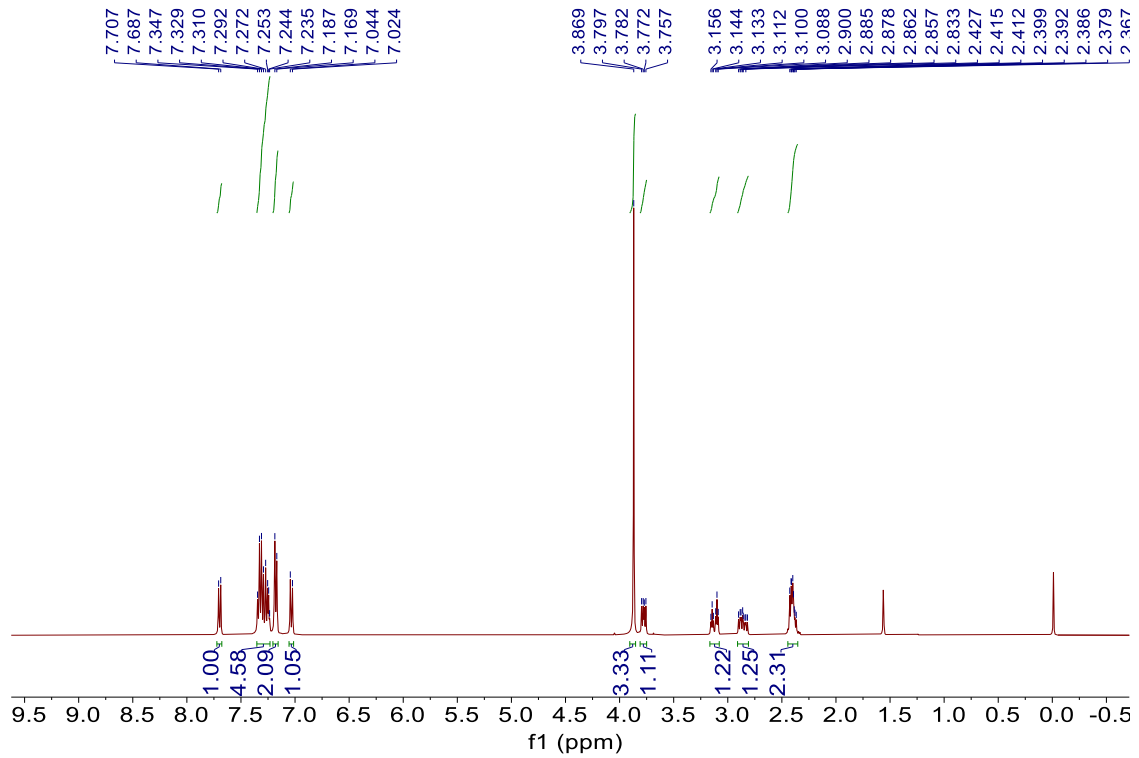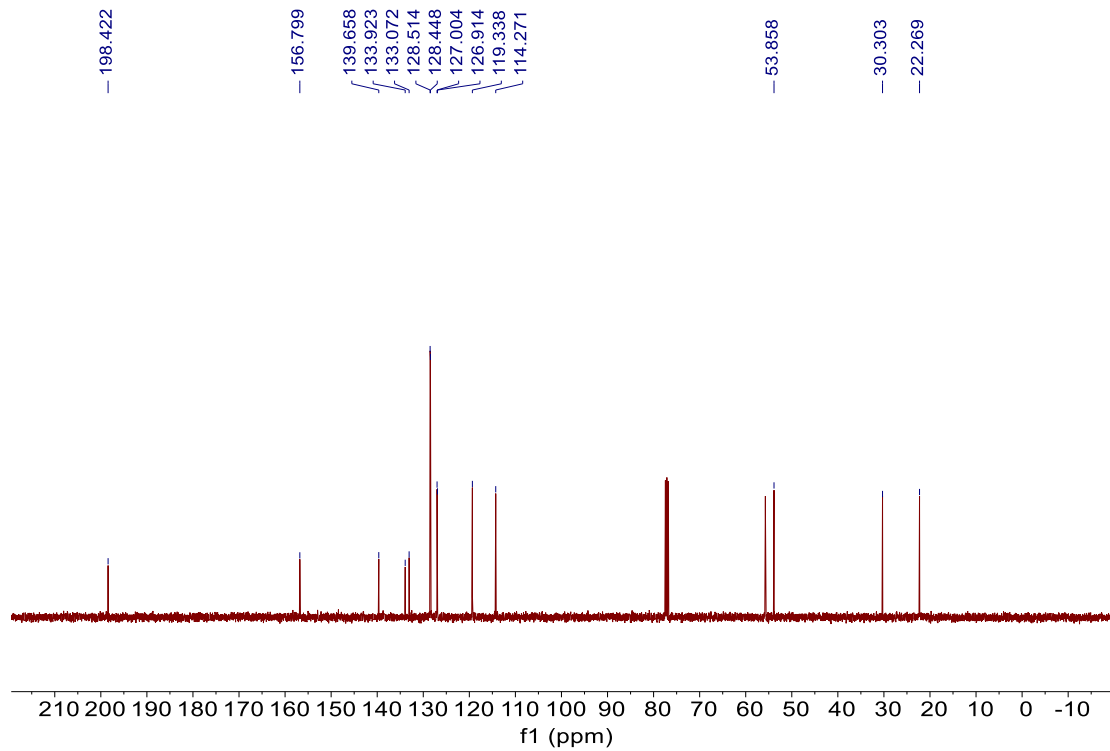

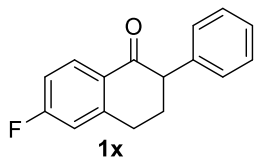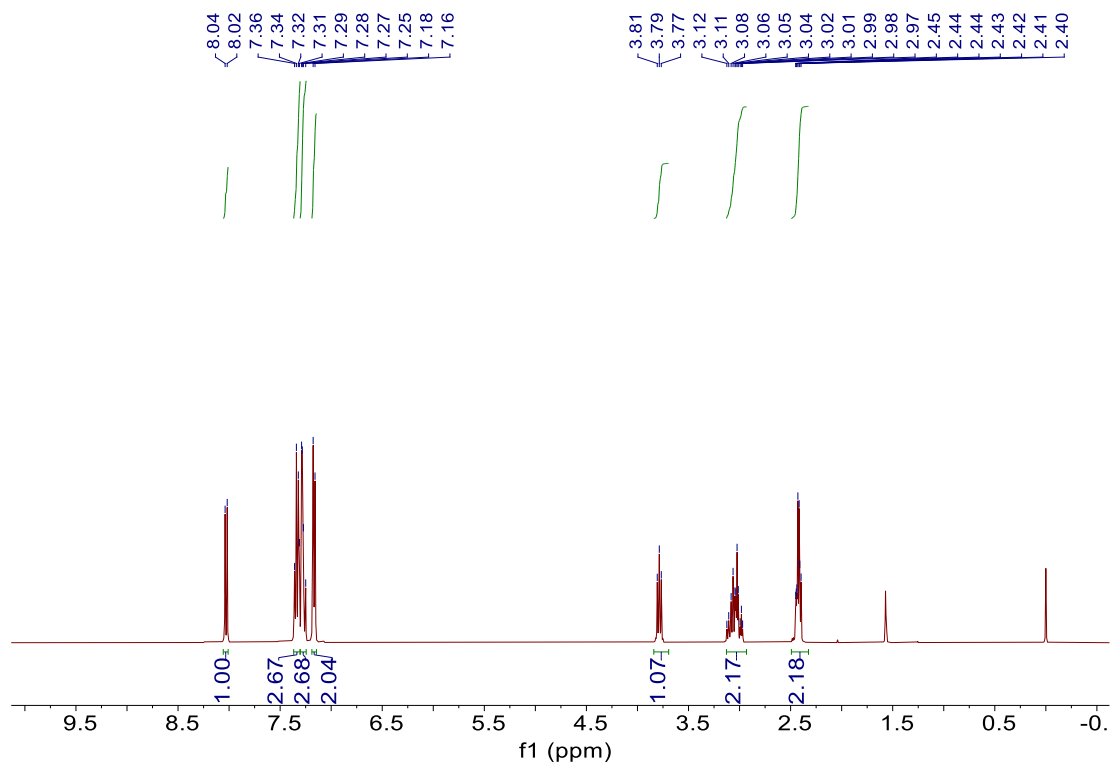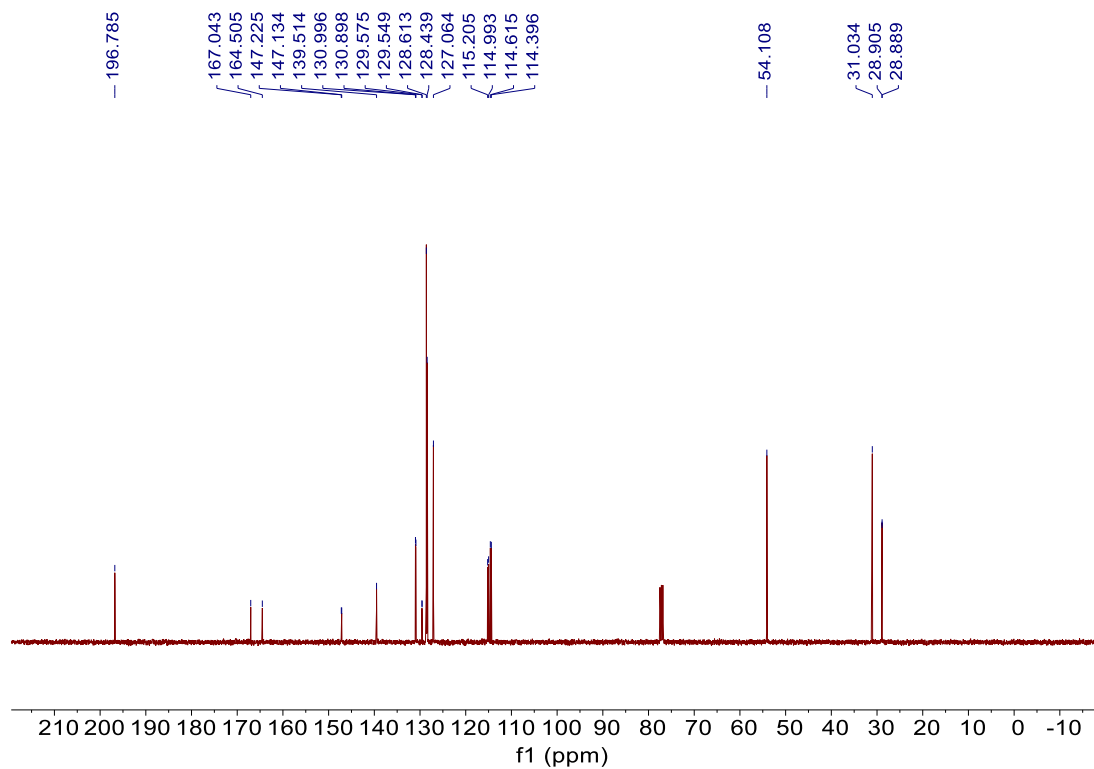

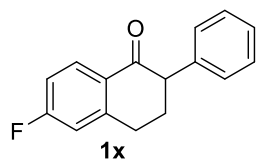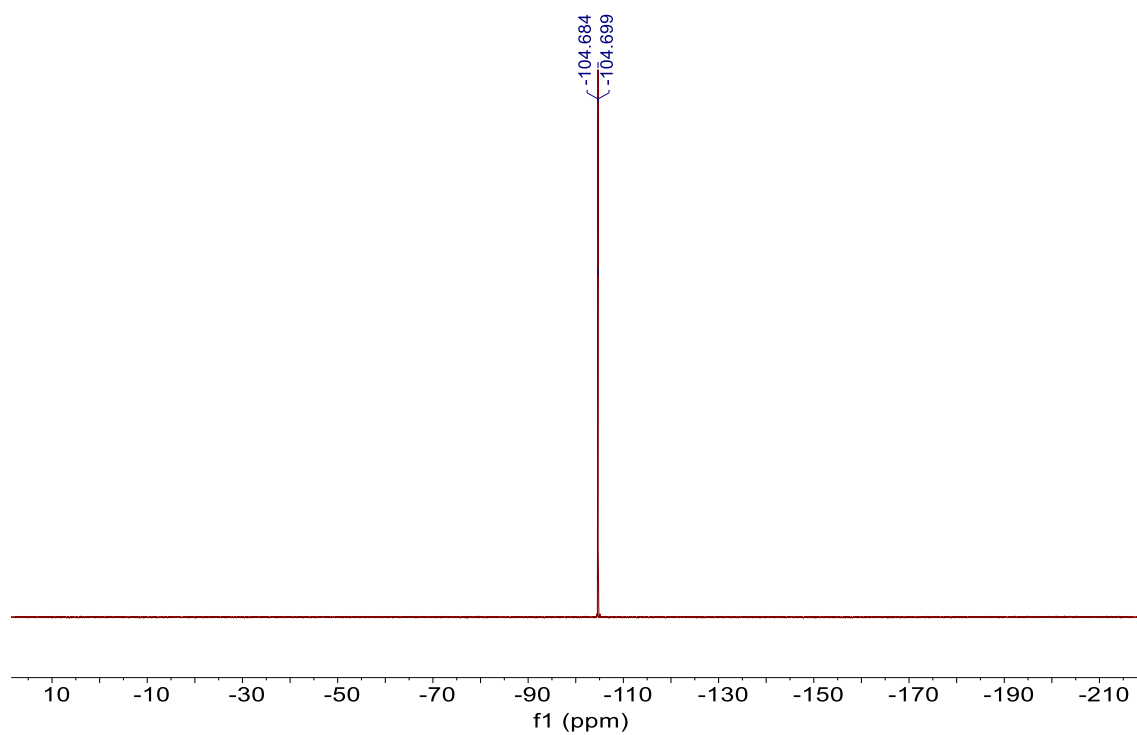

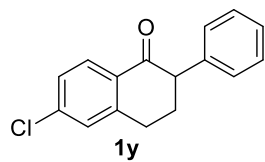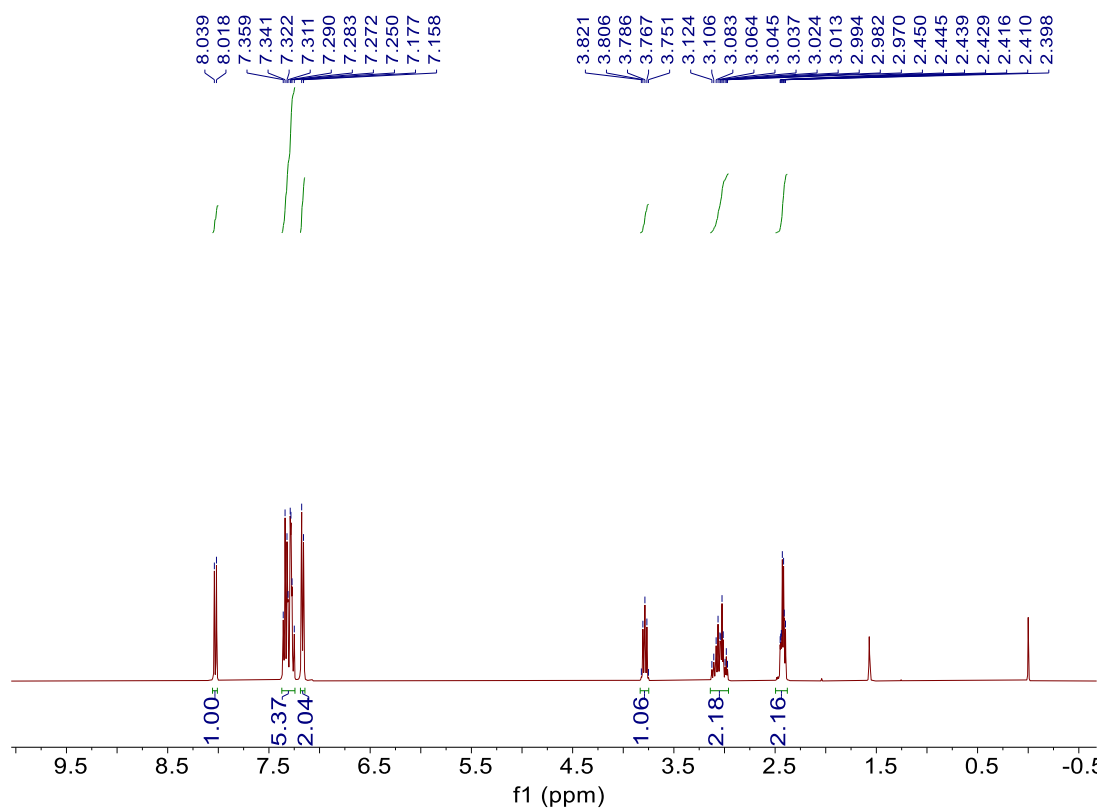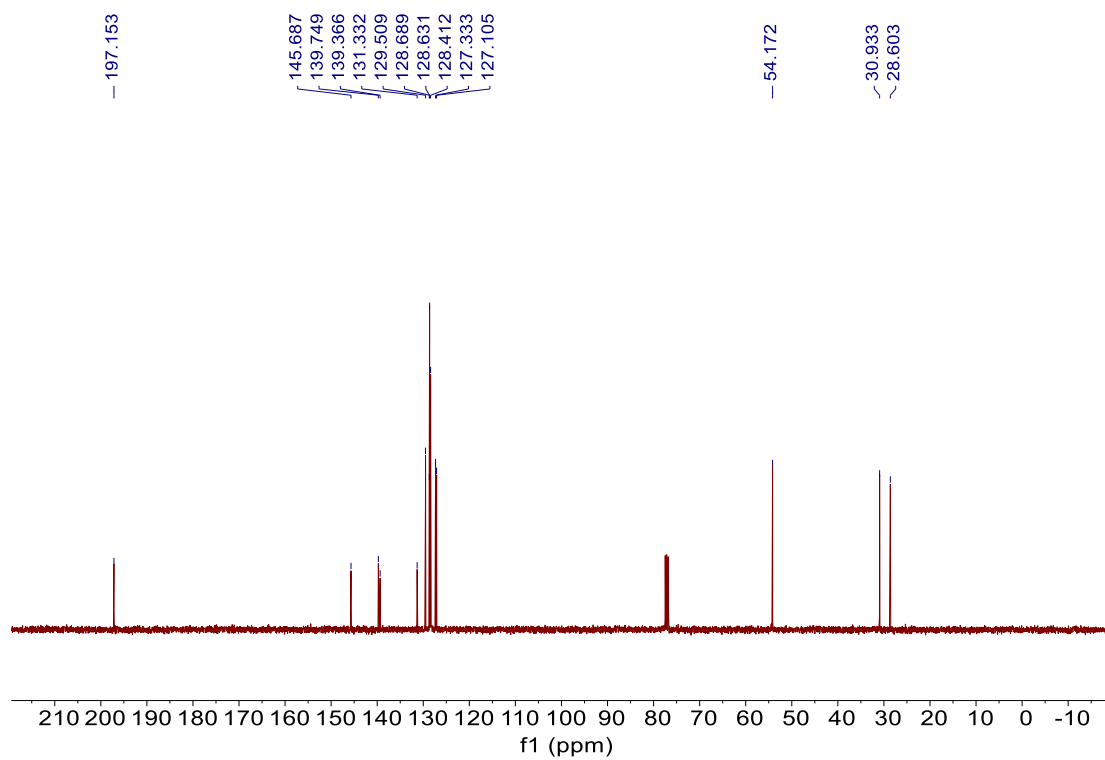

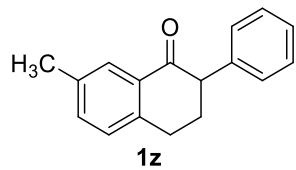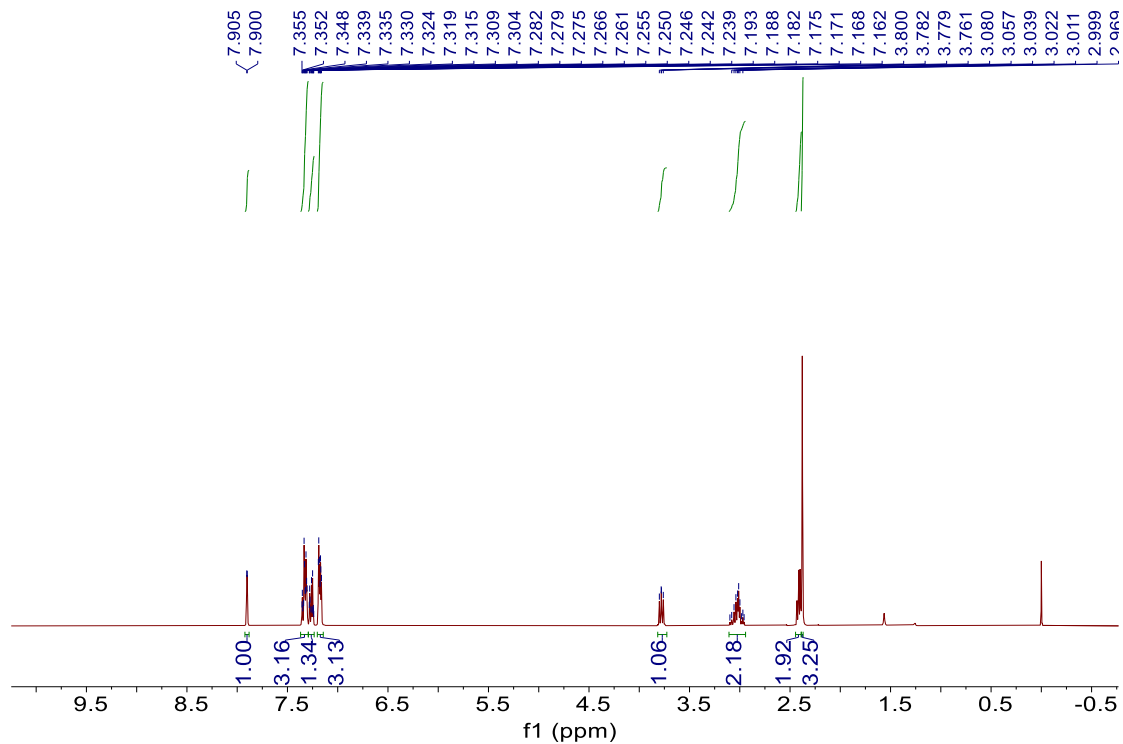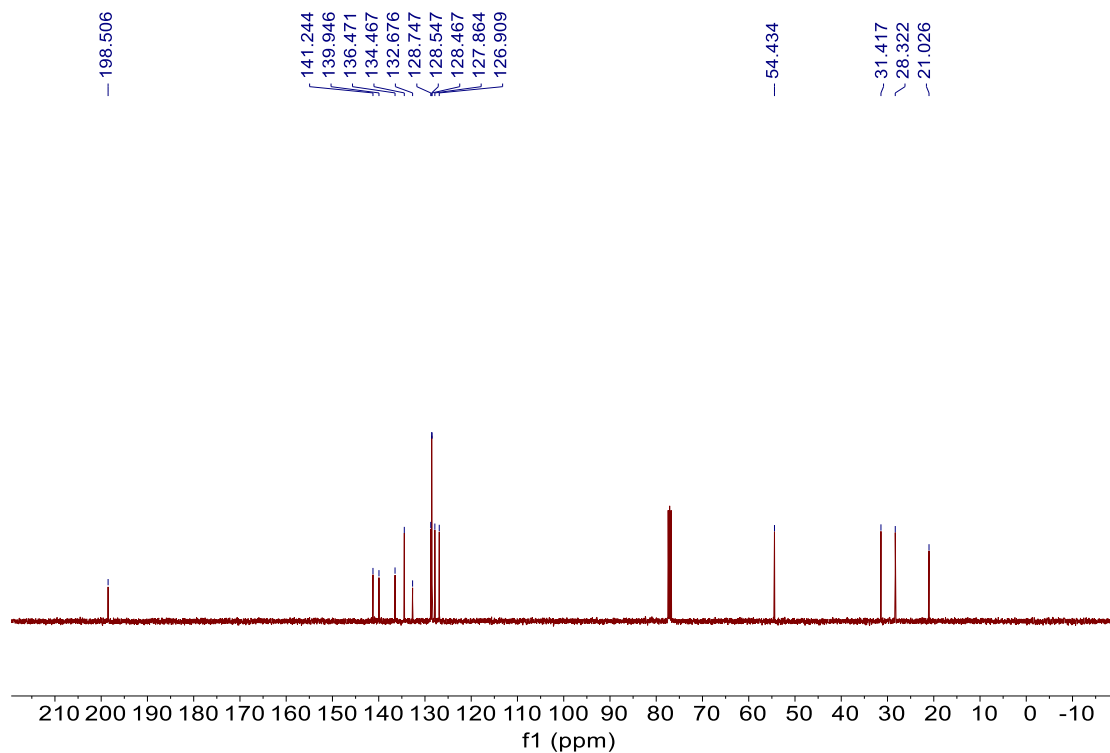

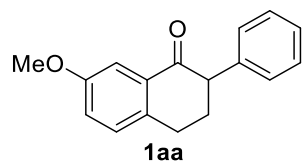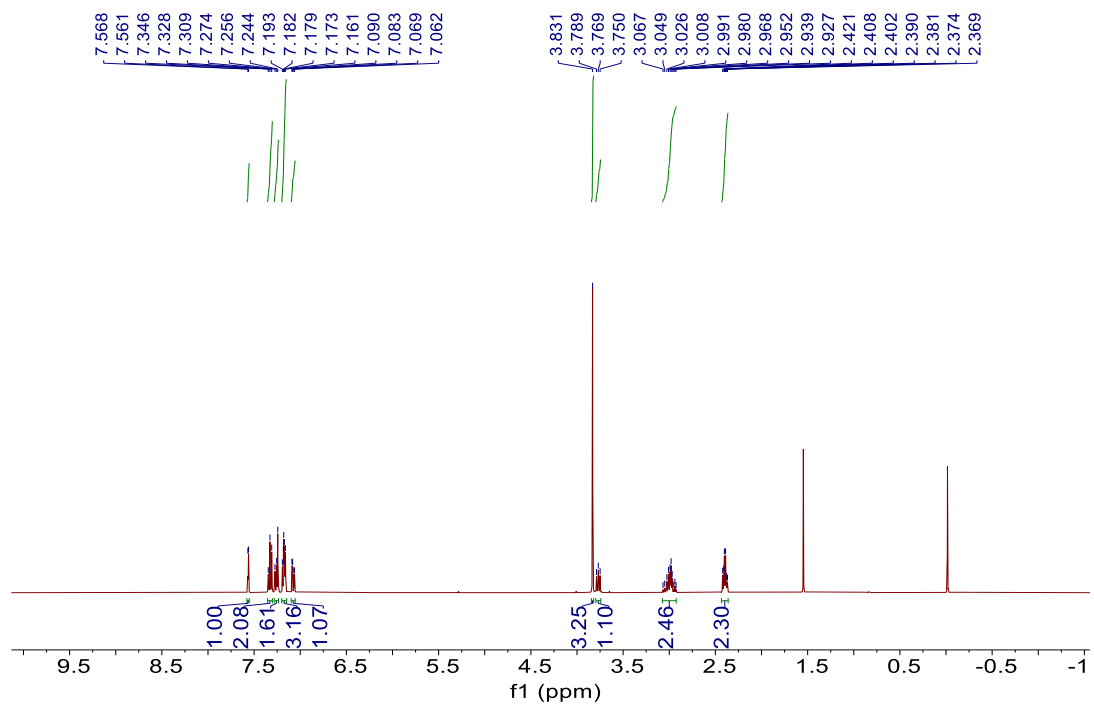



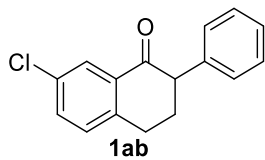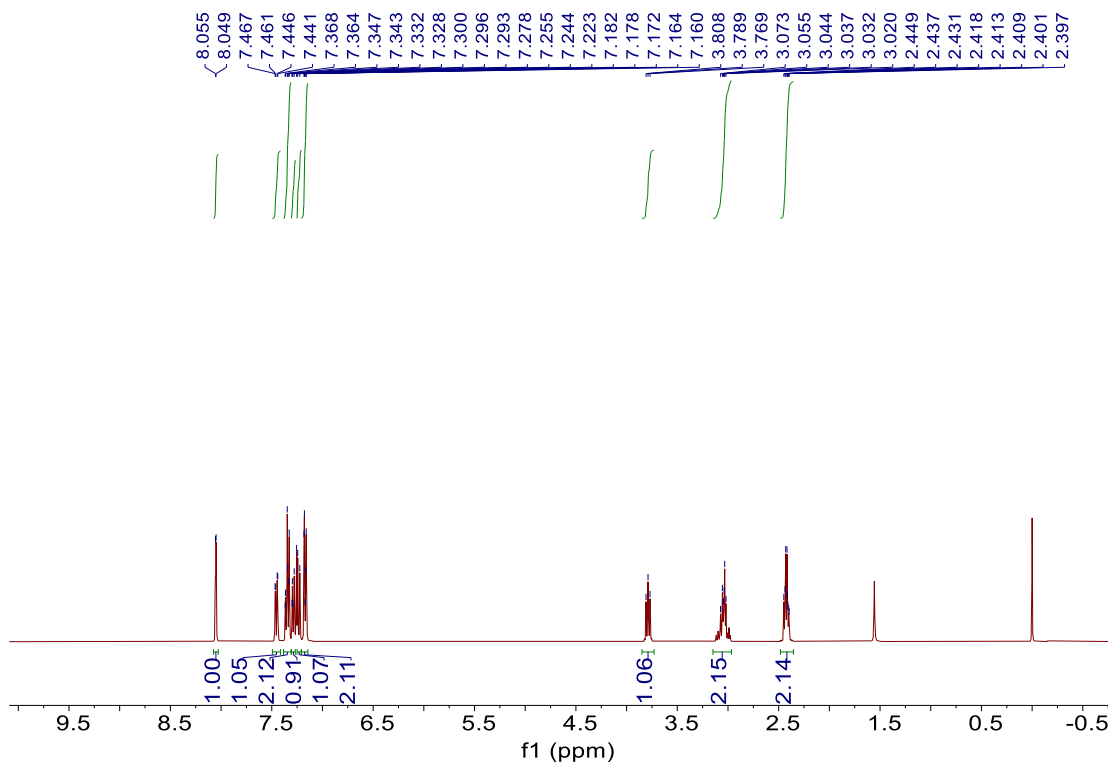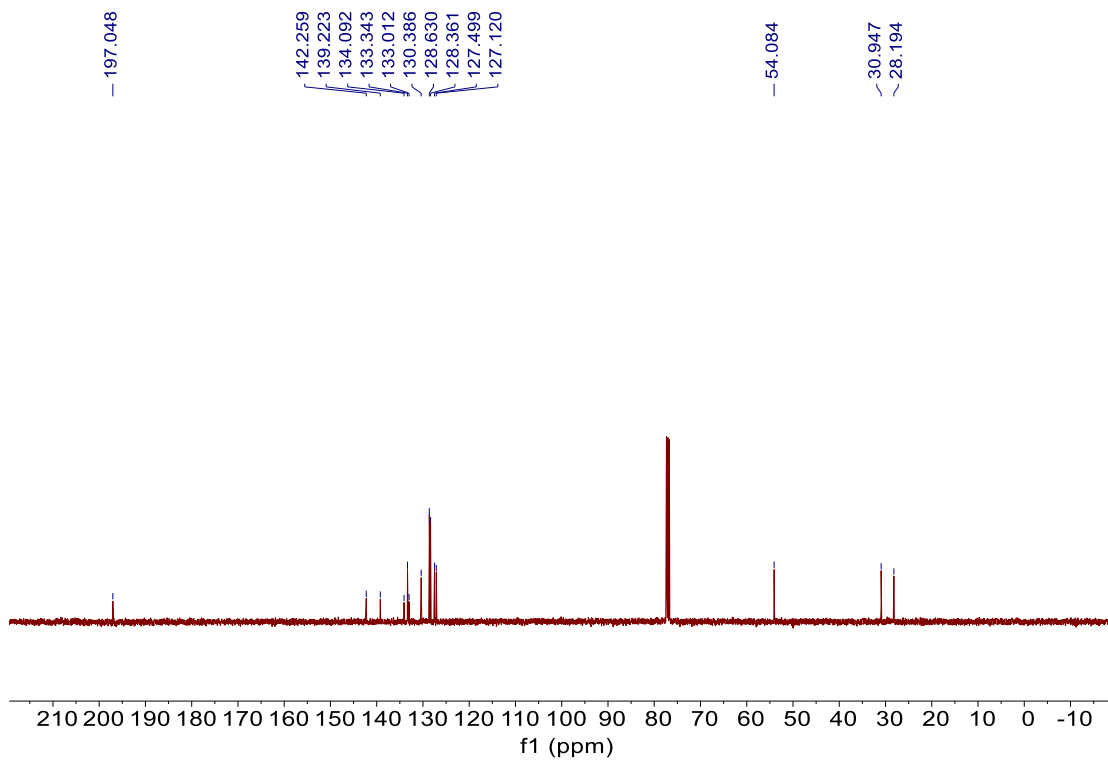

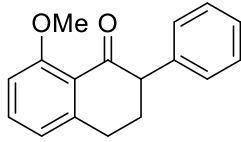

**1ac**

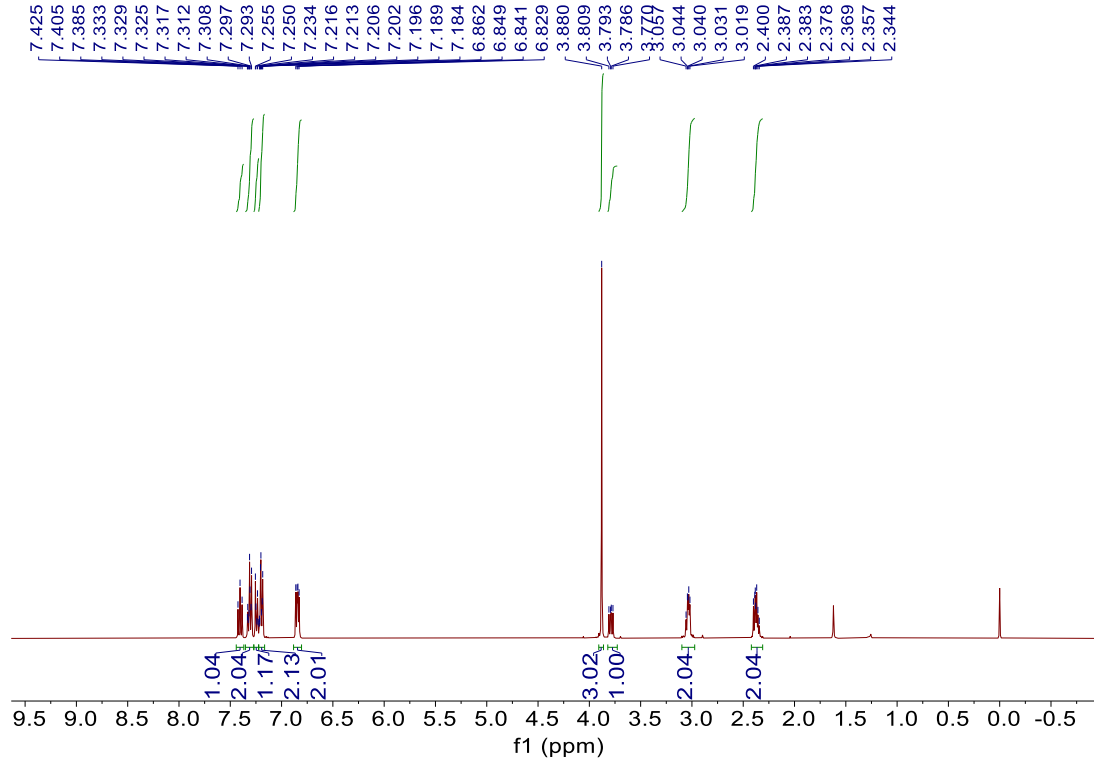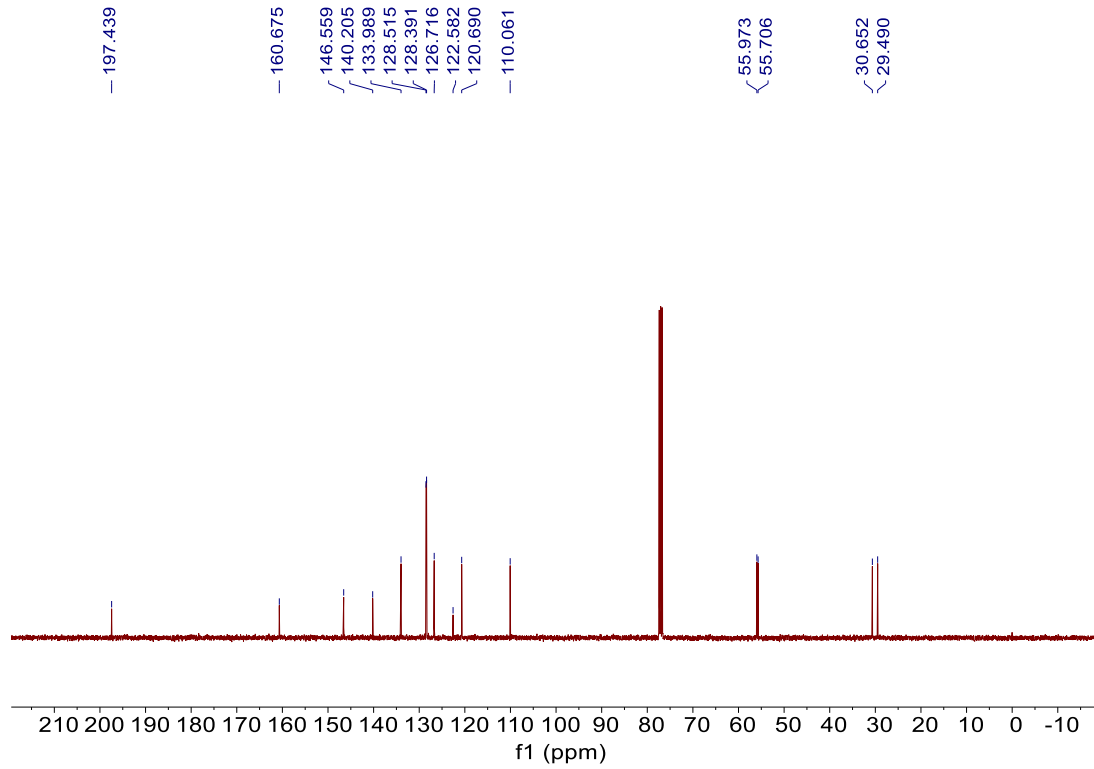

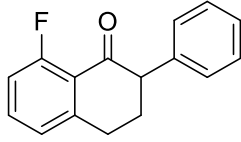

**1ad**

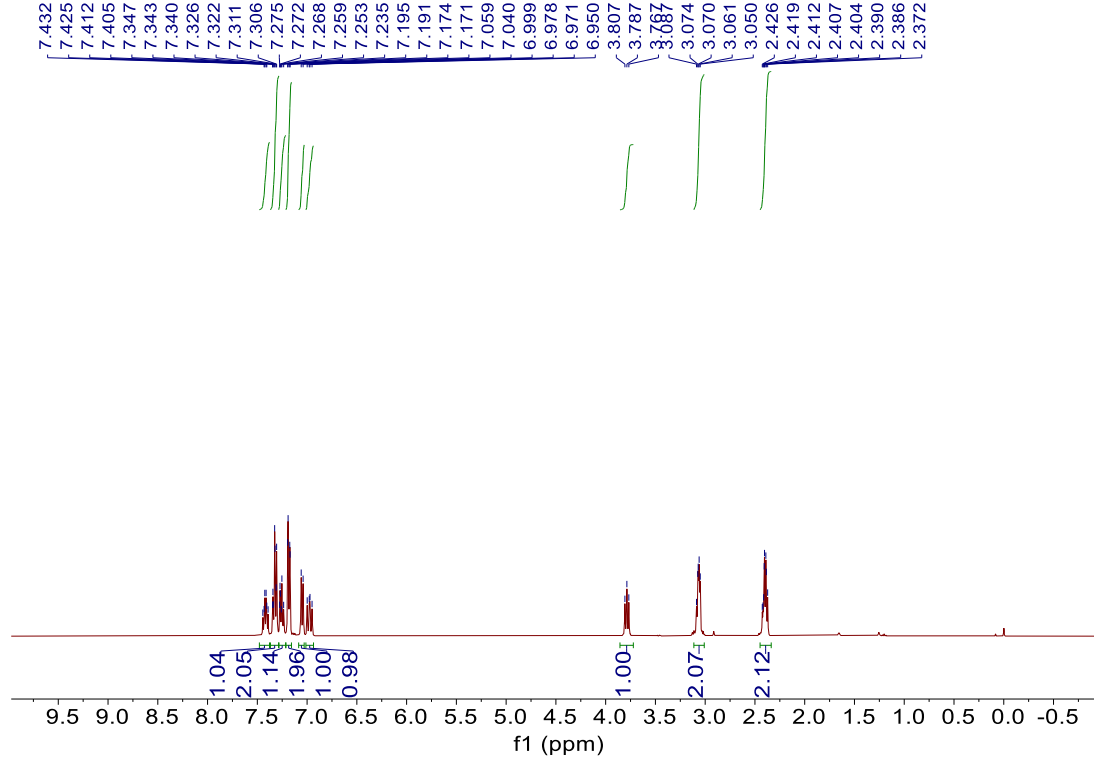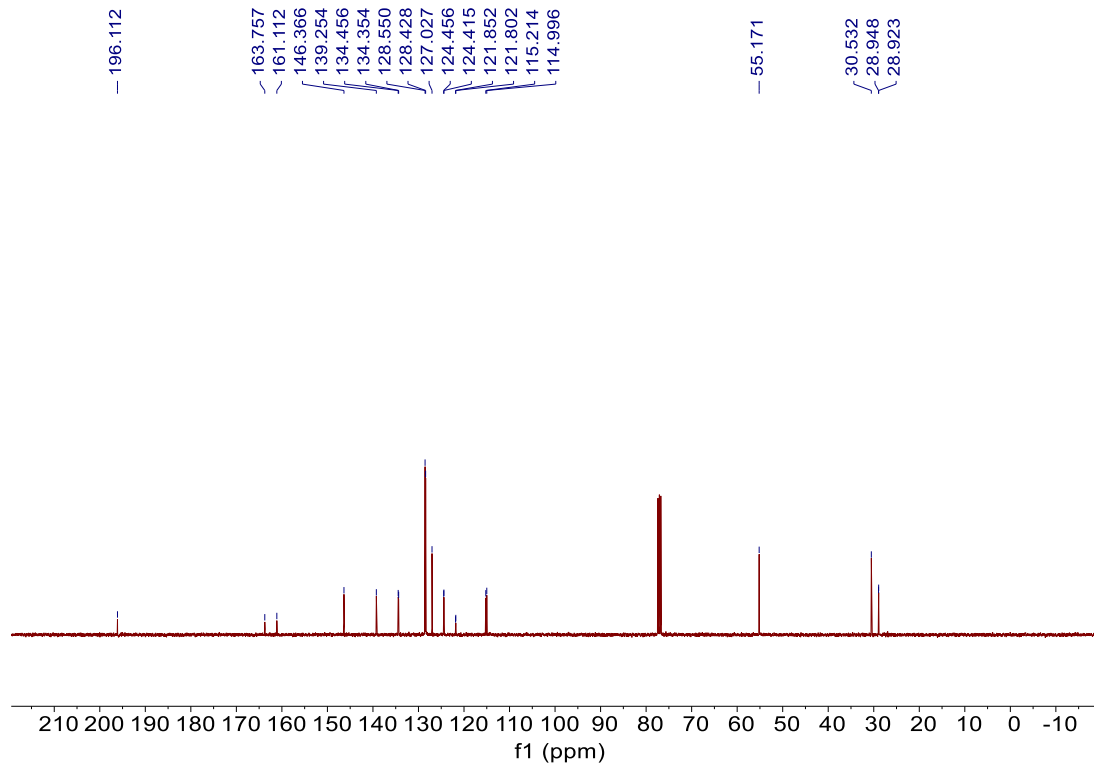

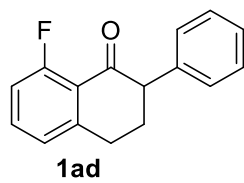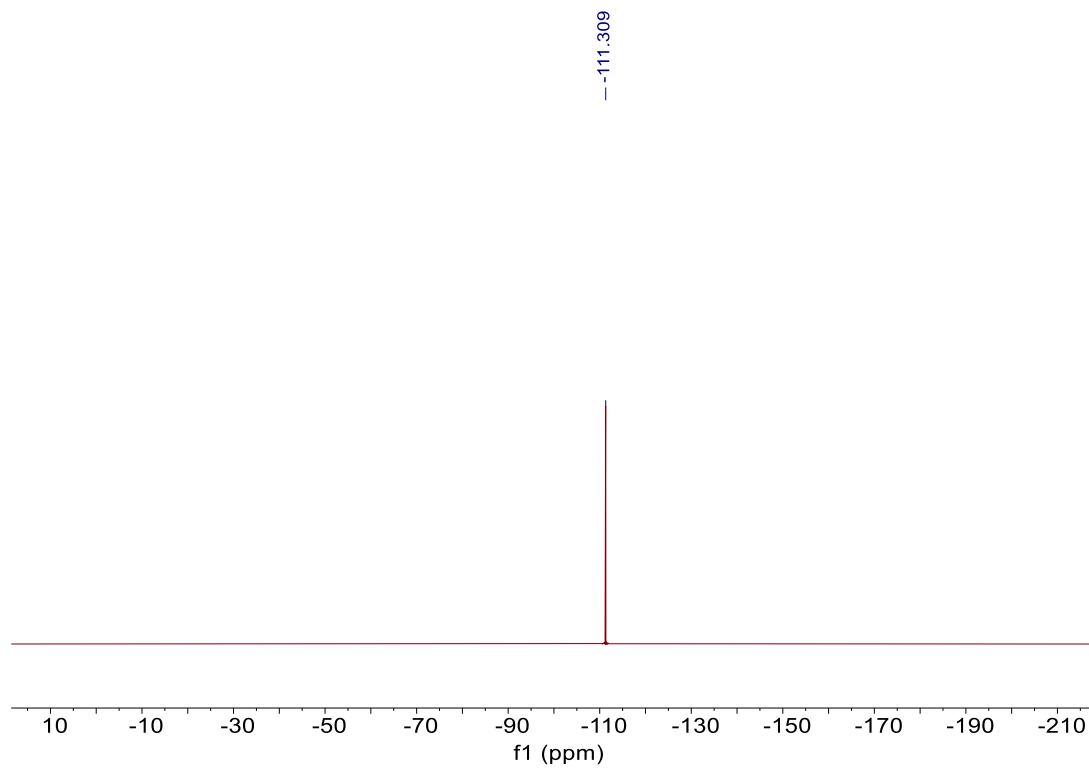

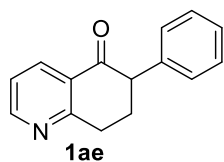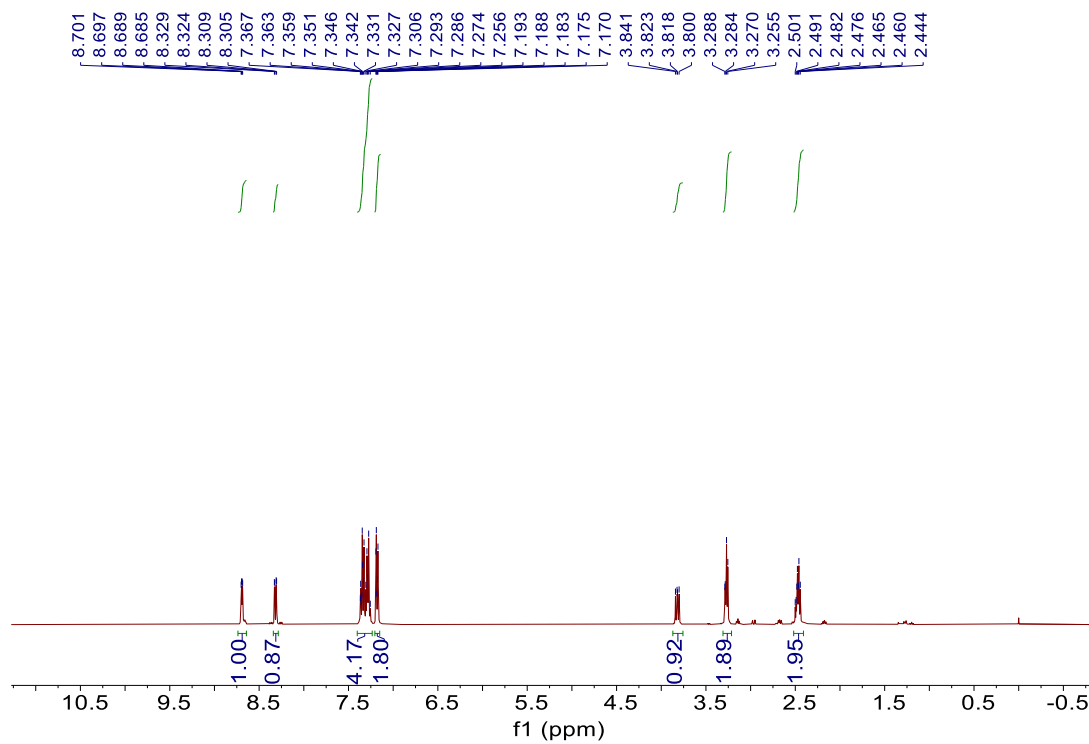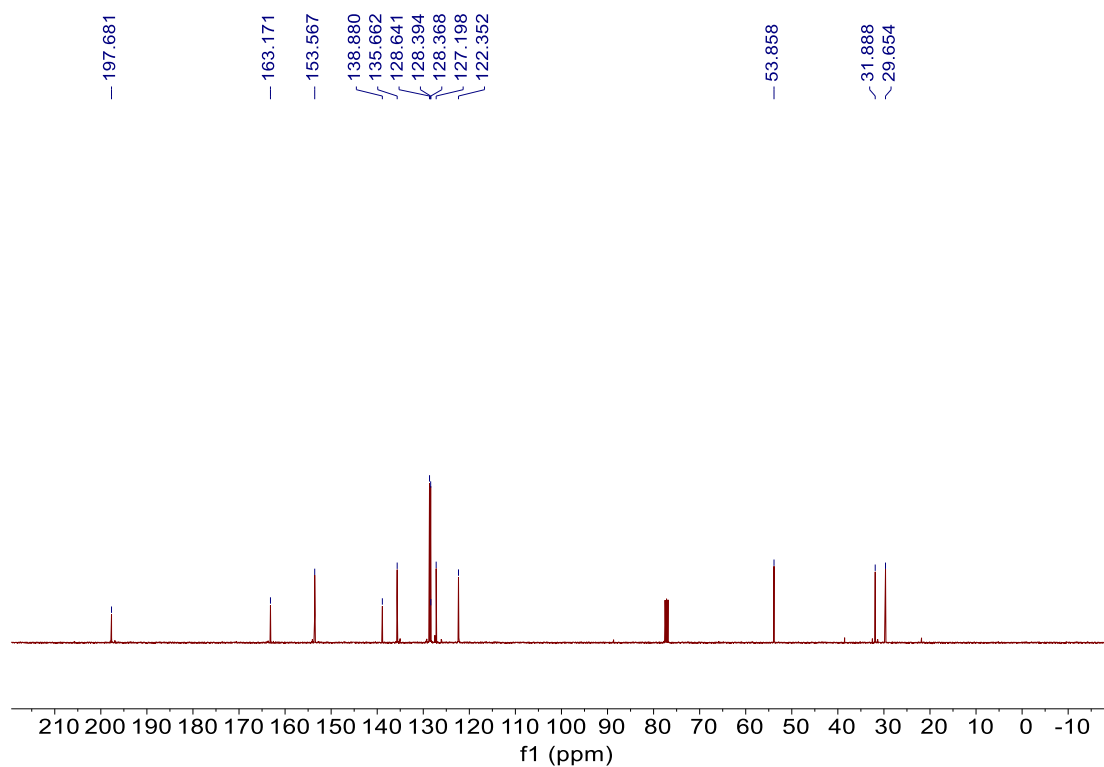

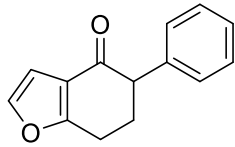

**1af**

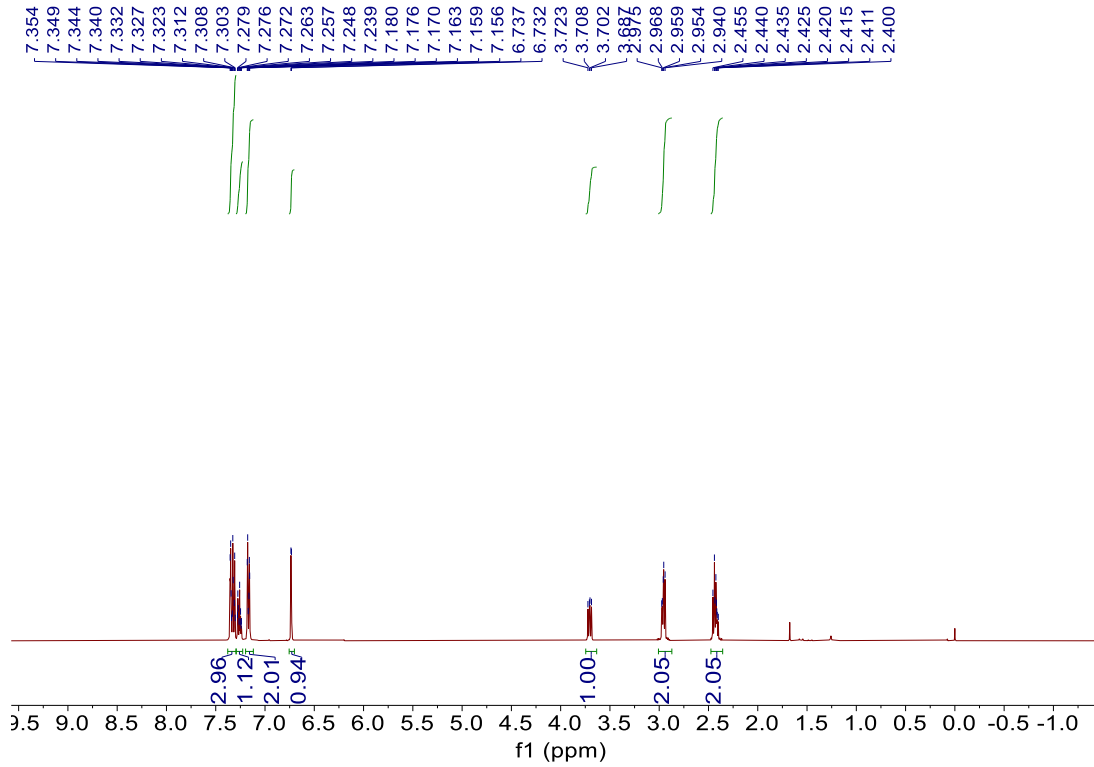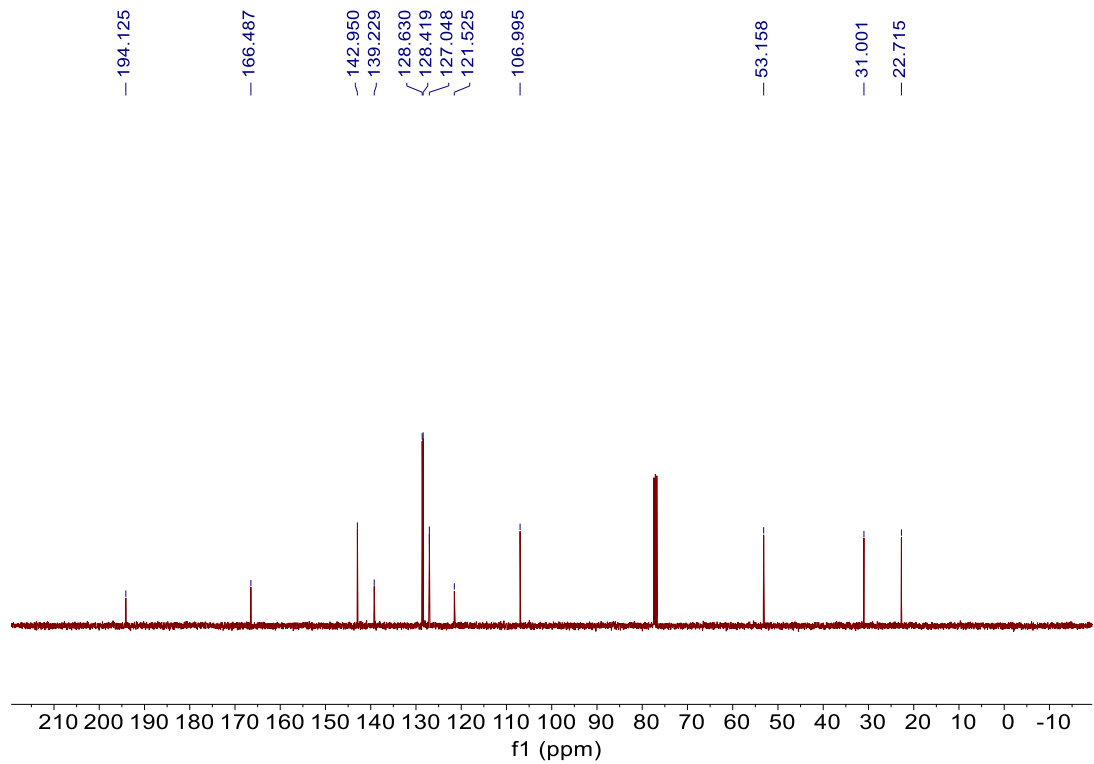

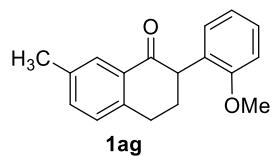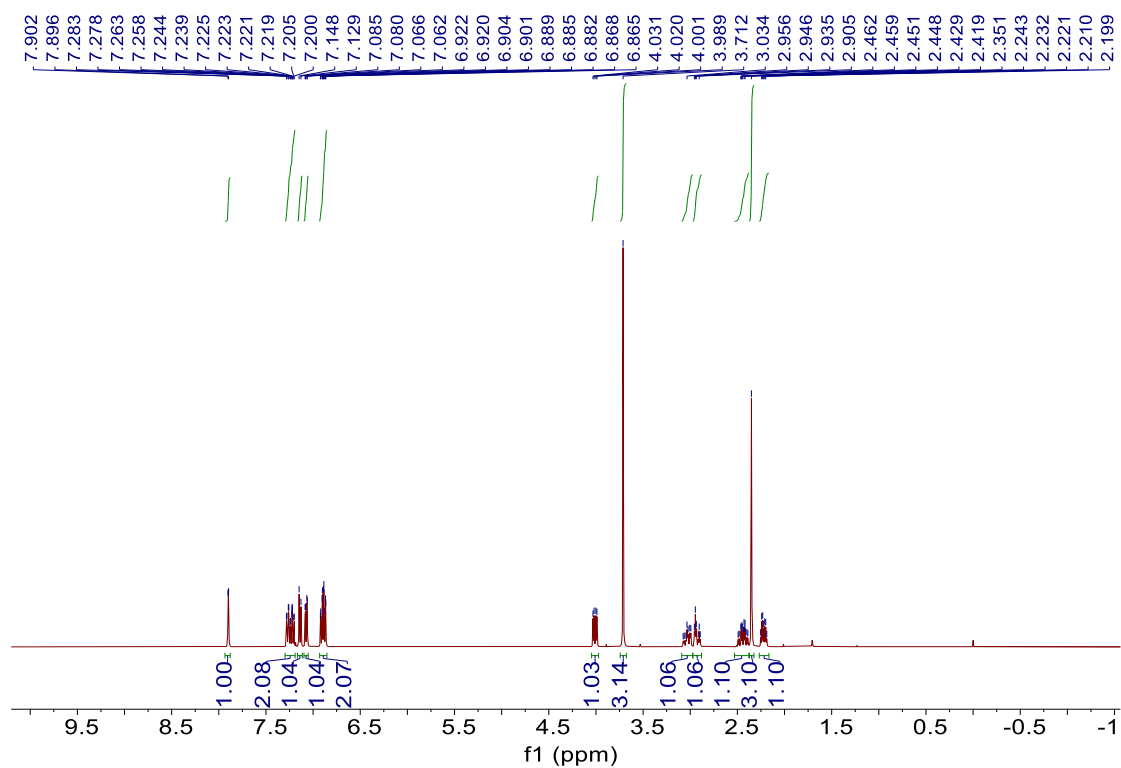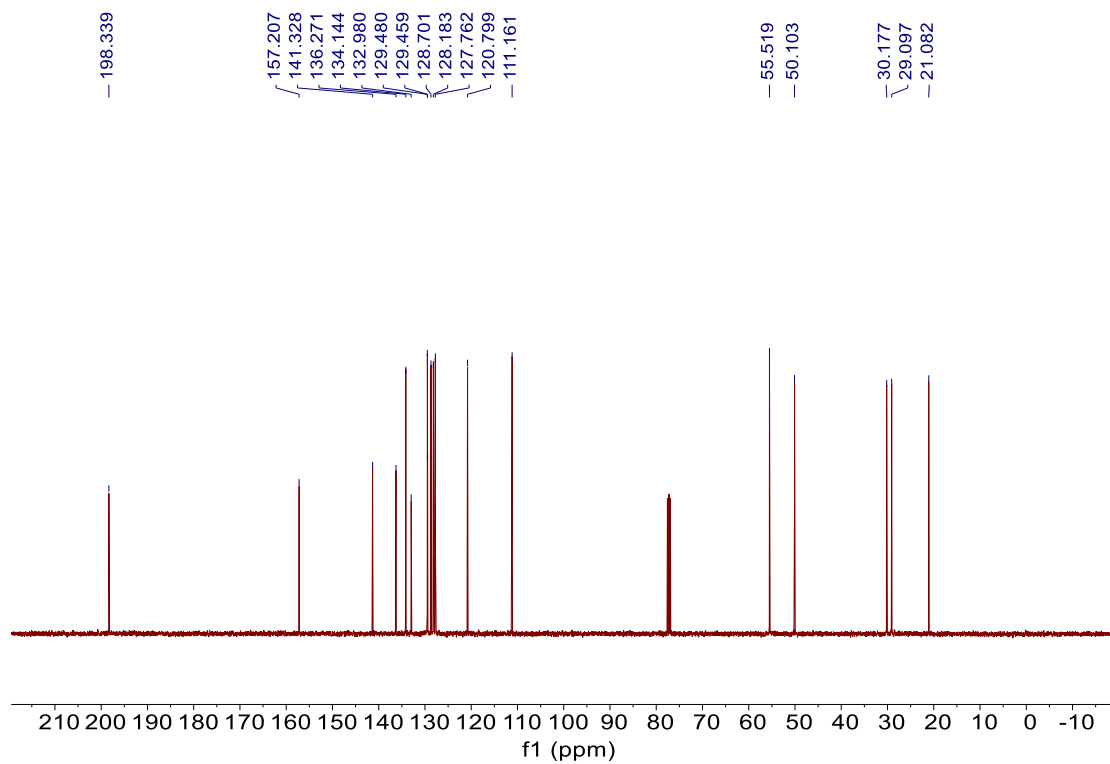

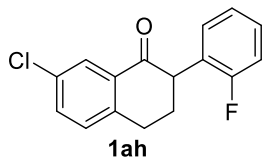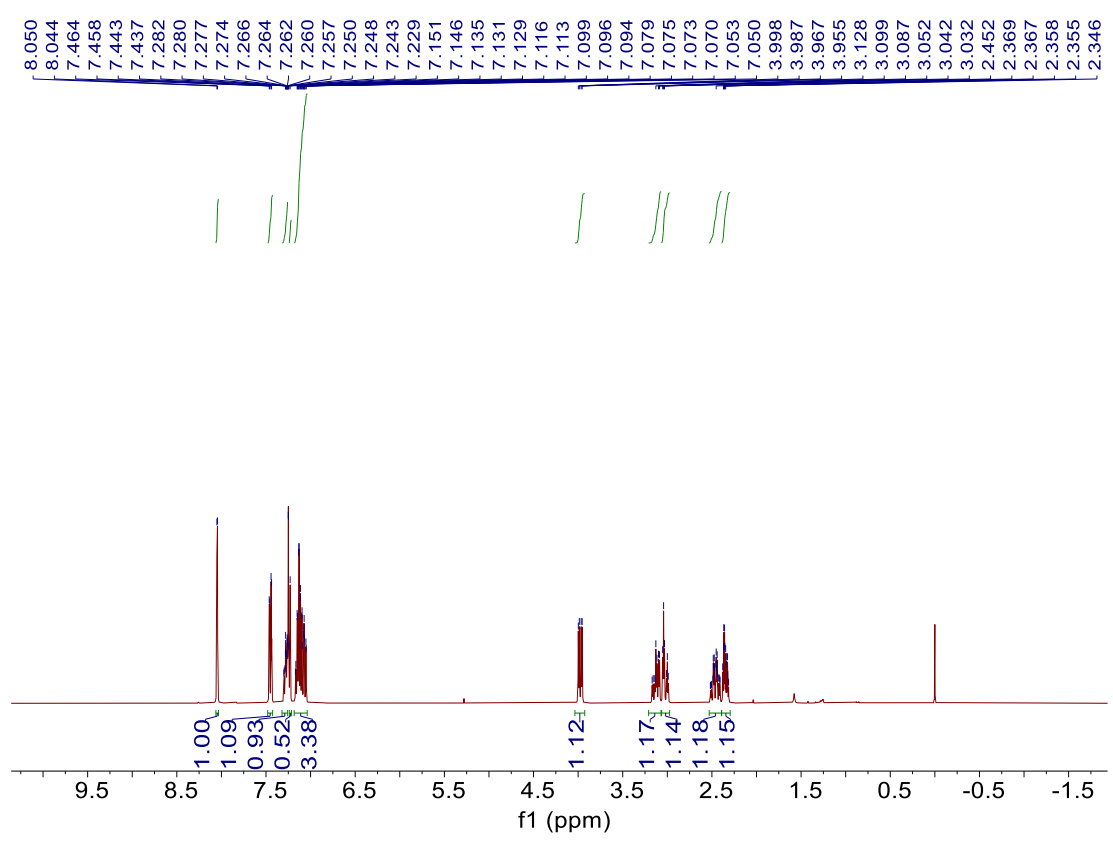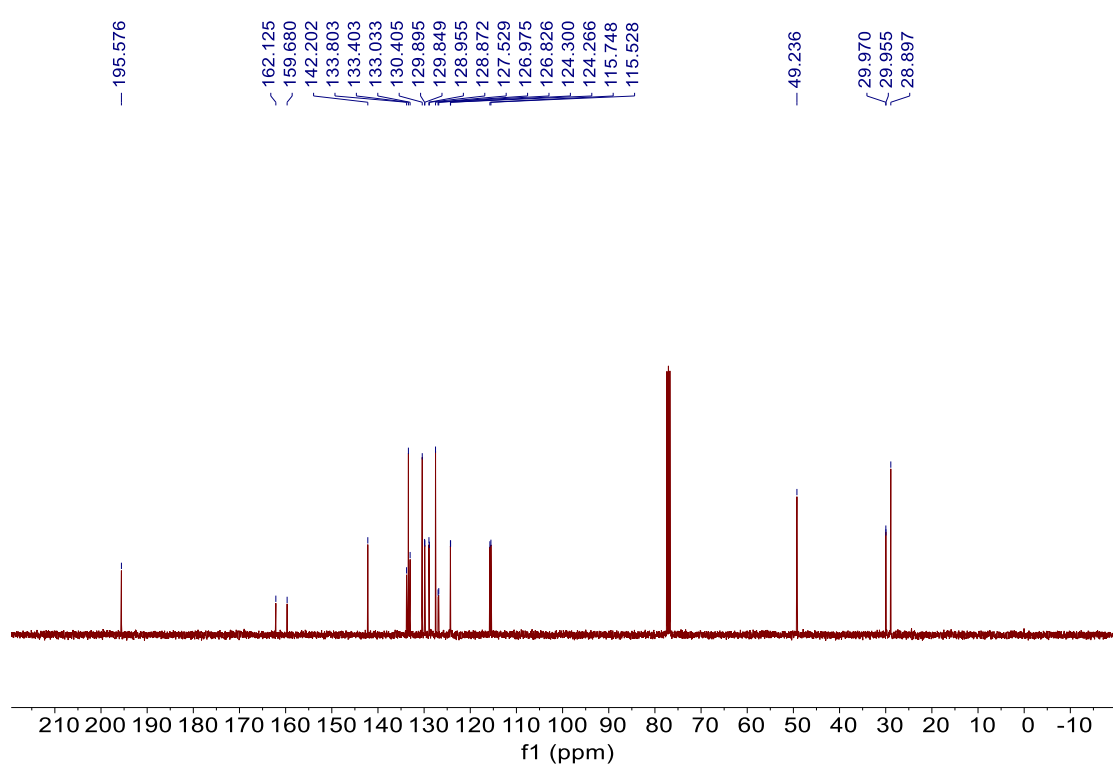



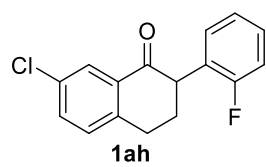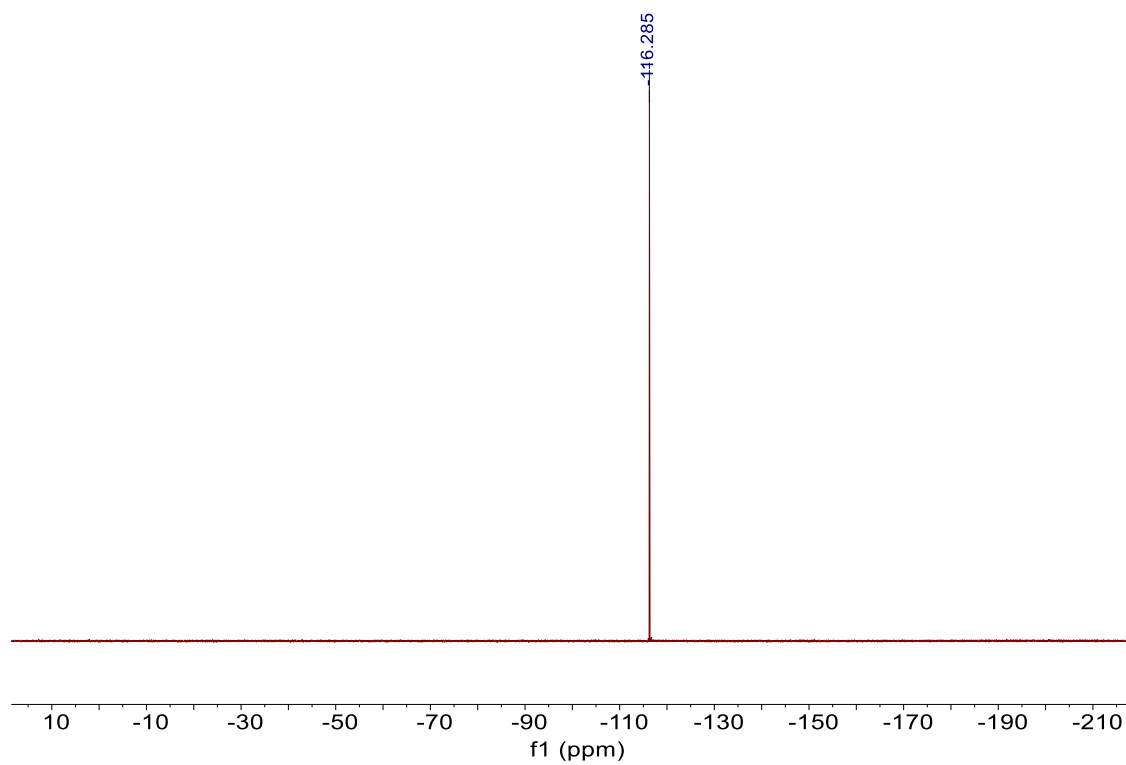

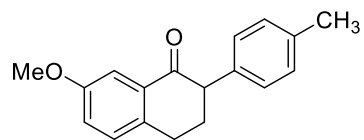

**1ai**

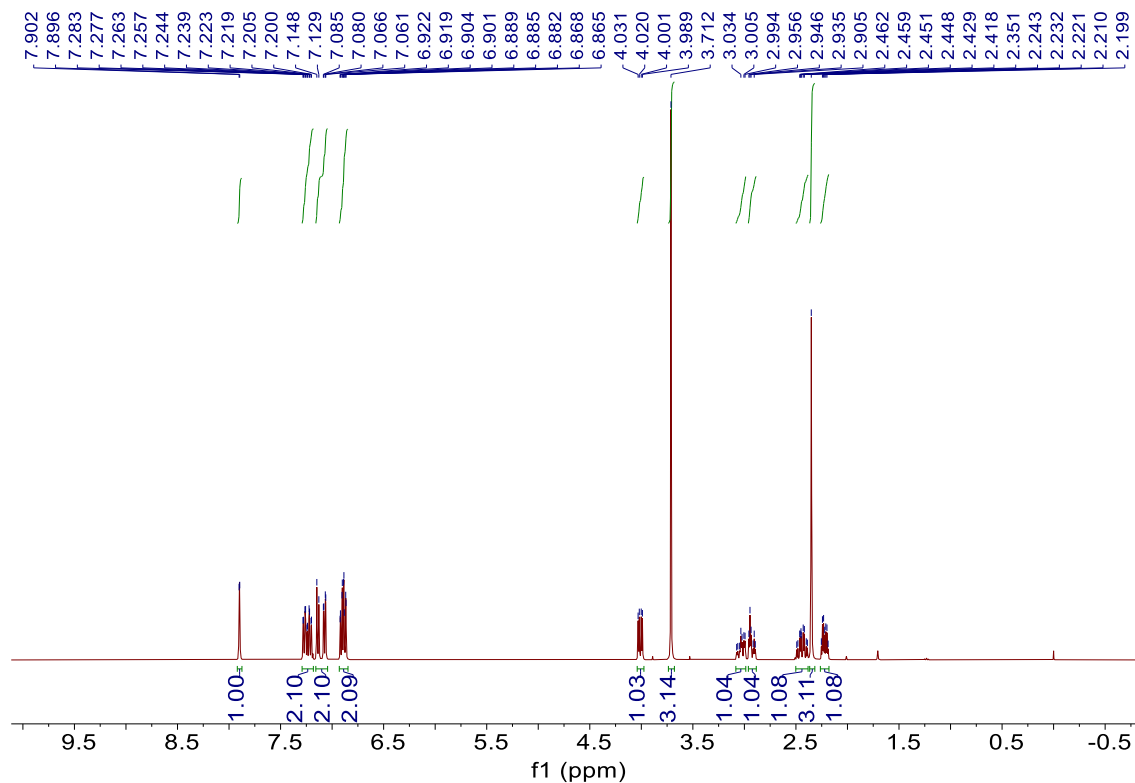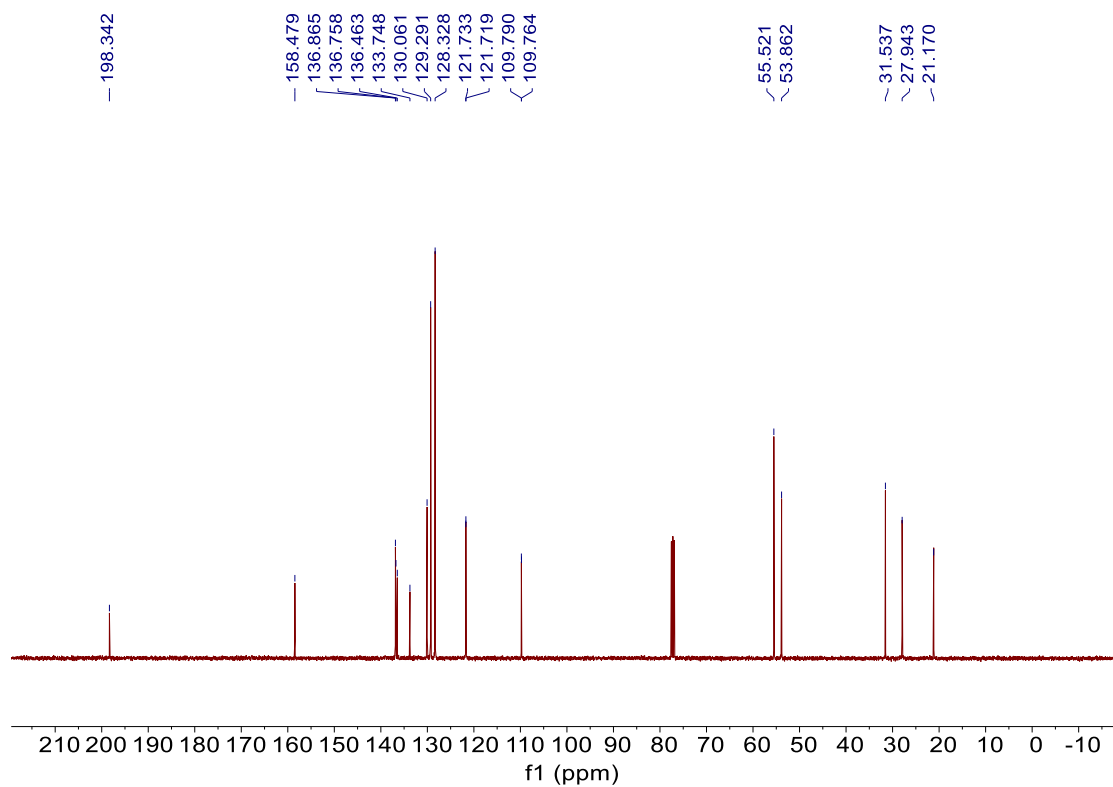

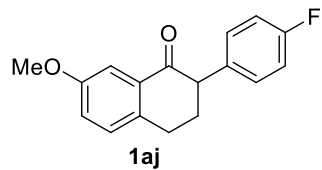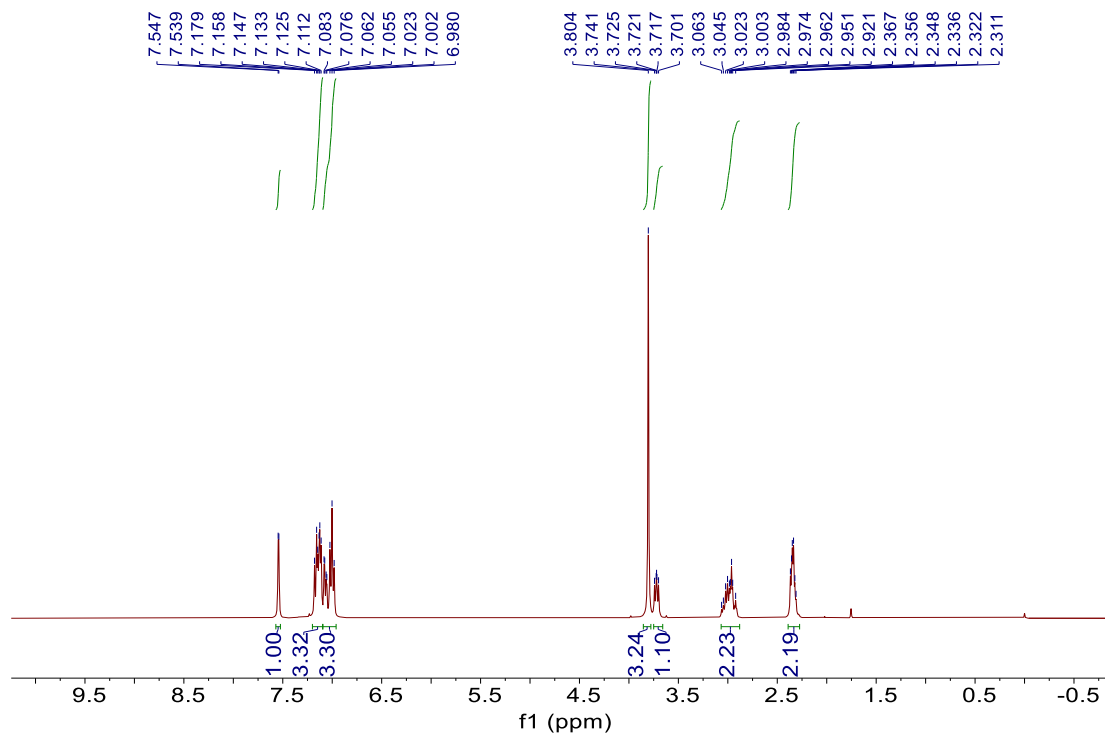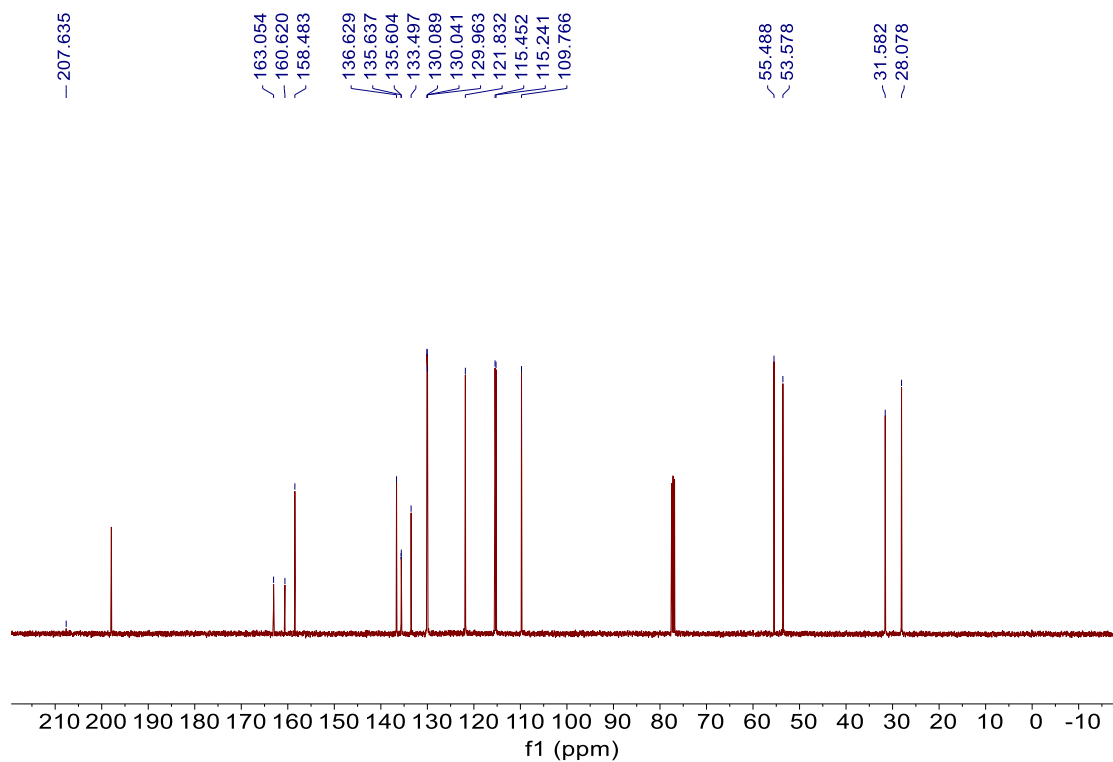

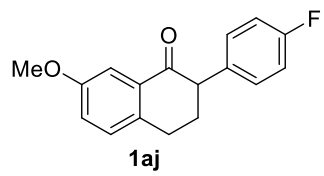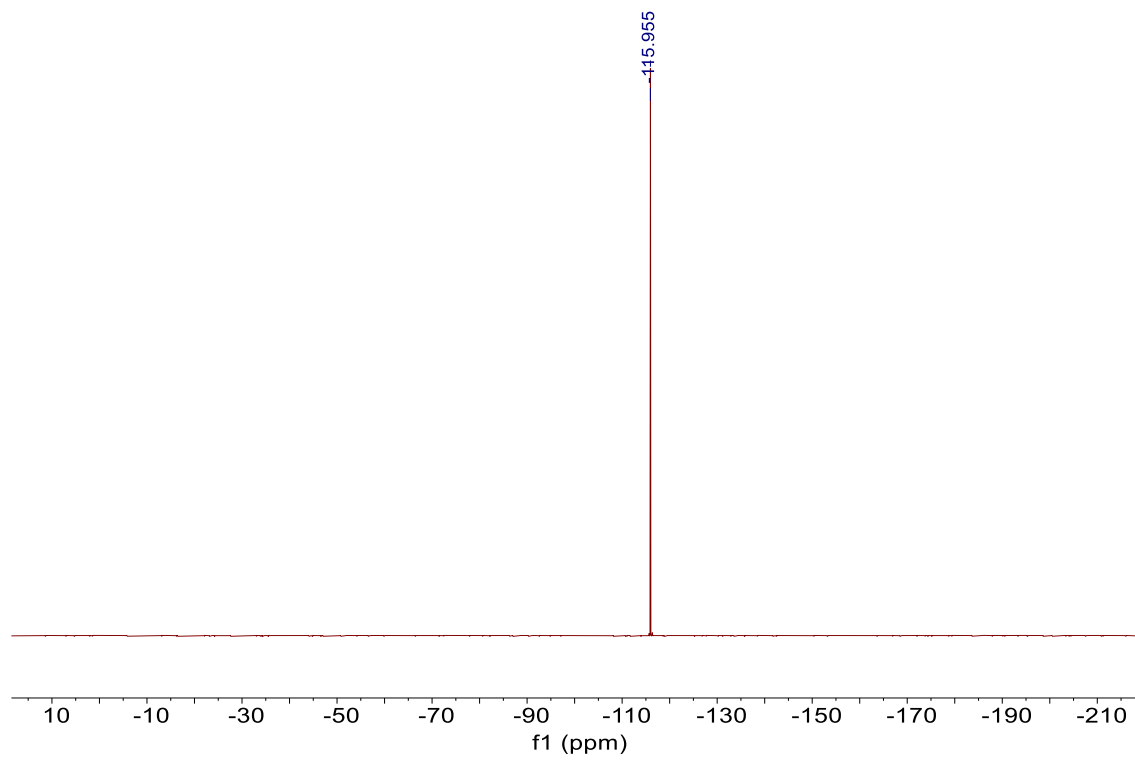

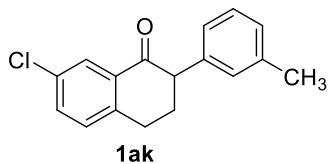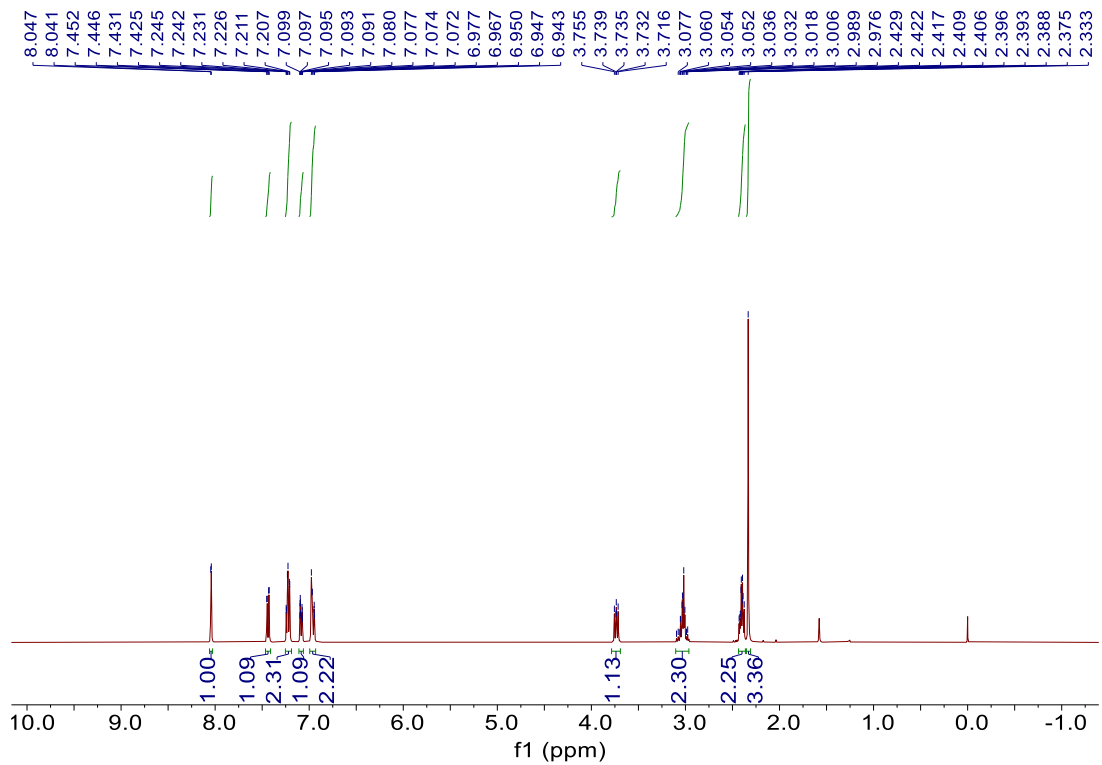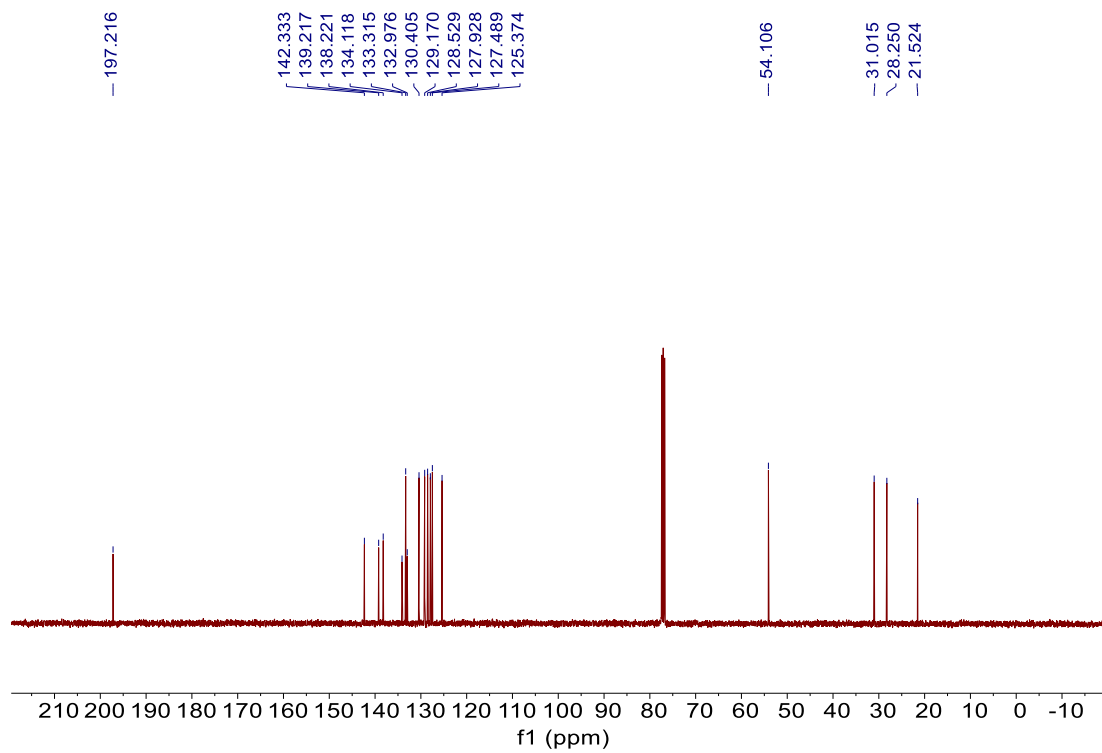

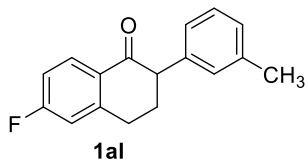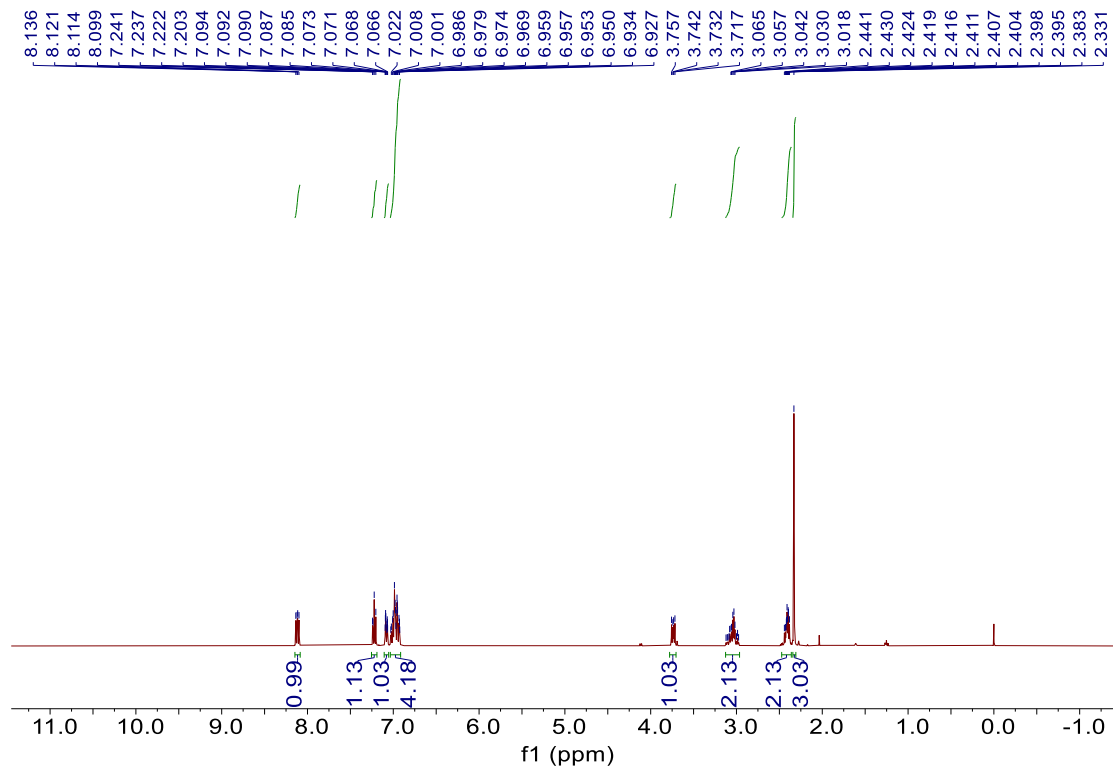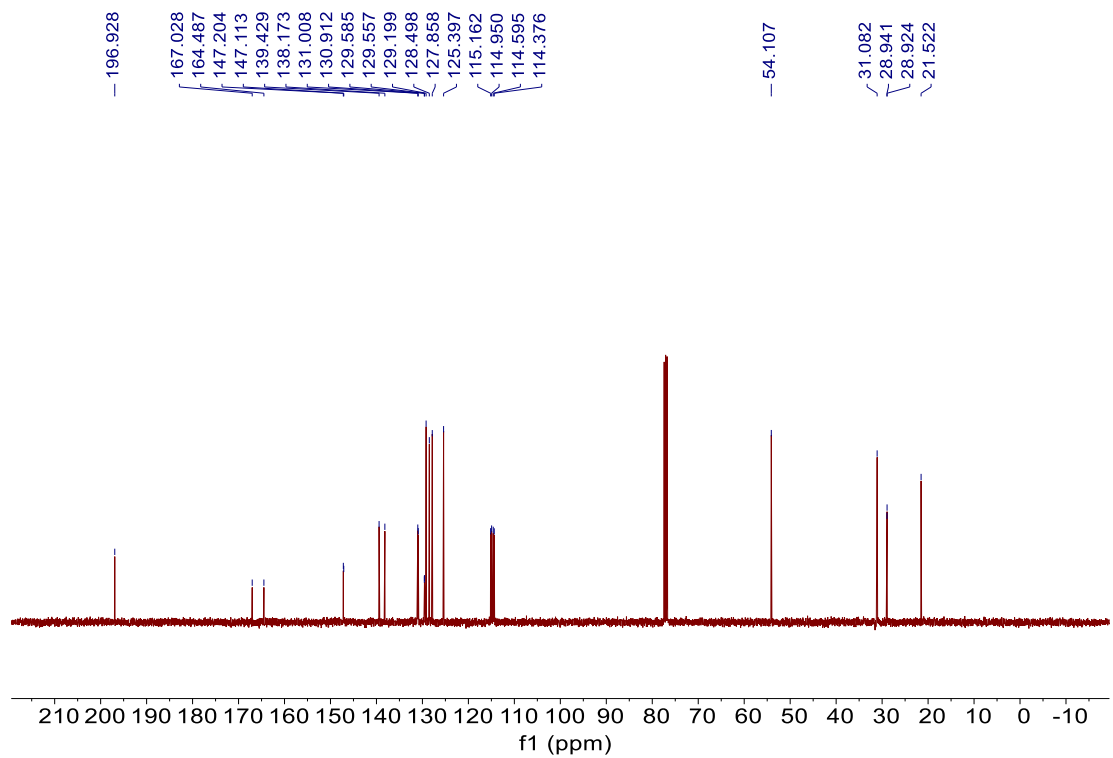

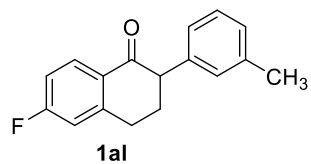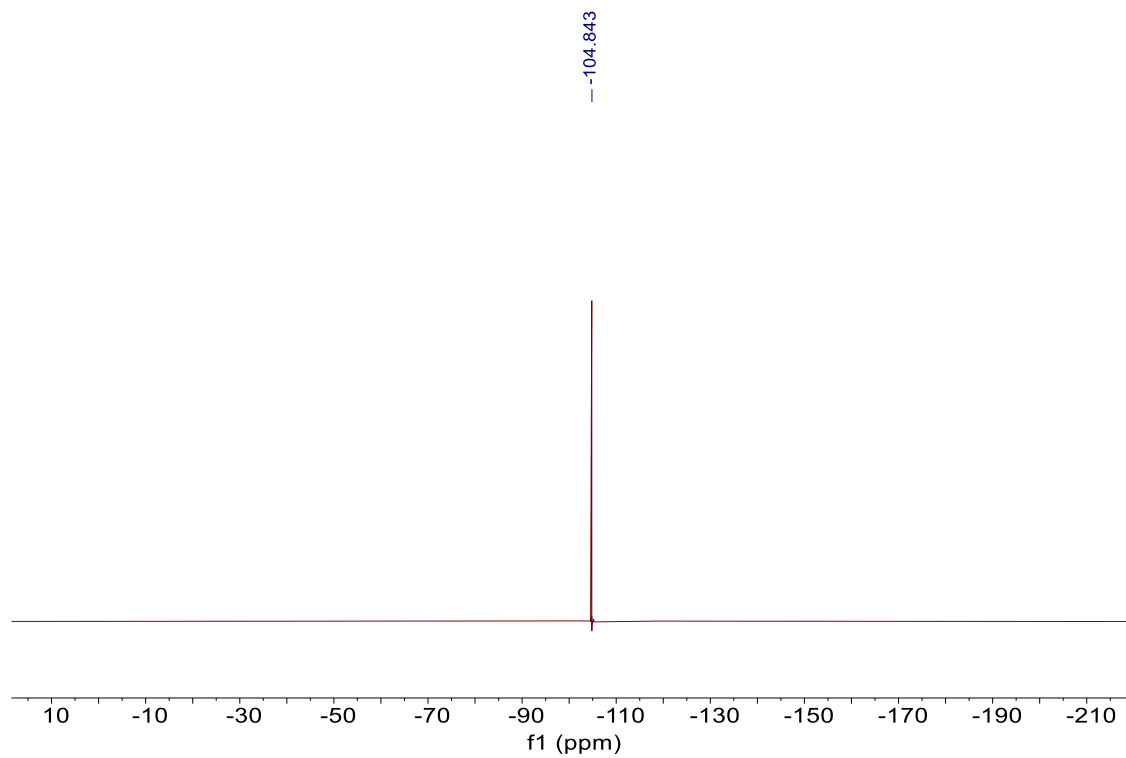

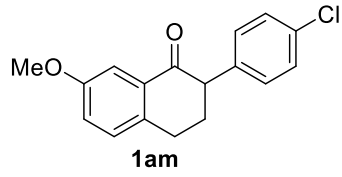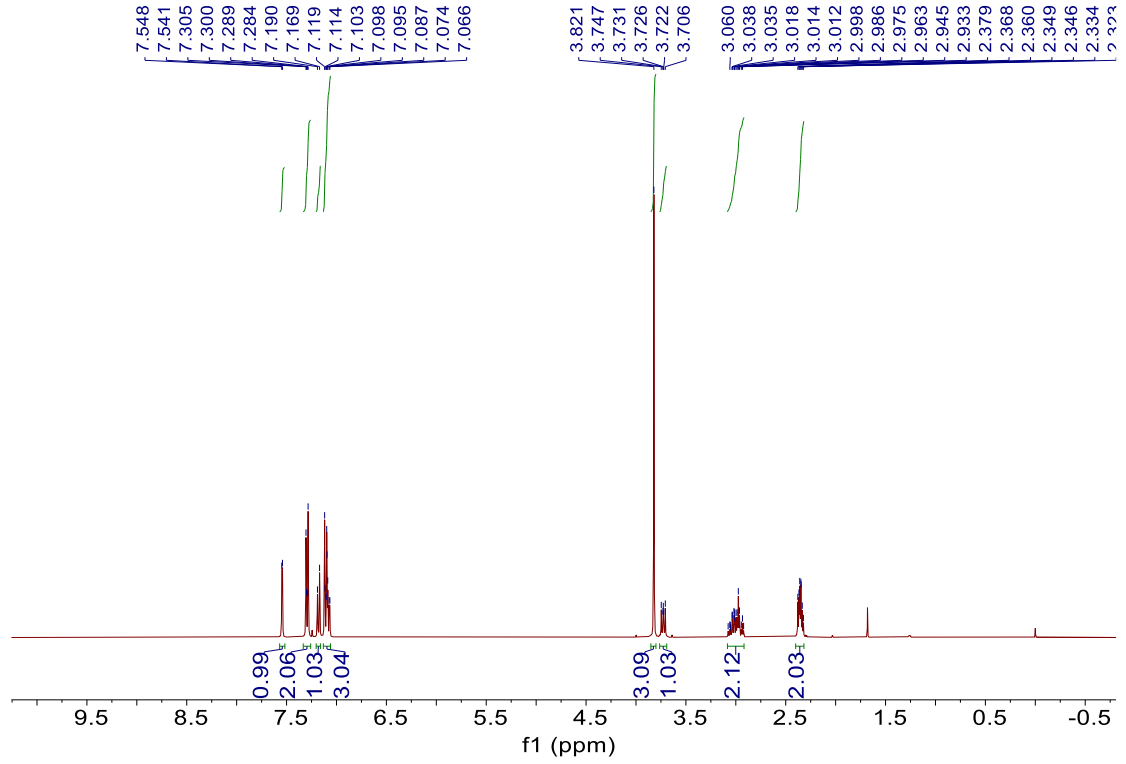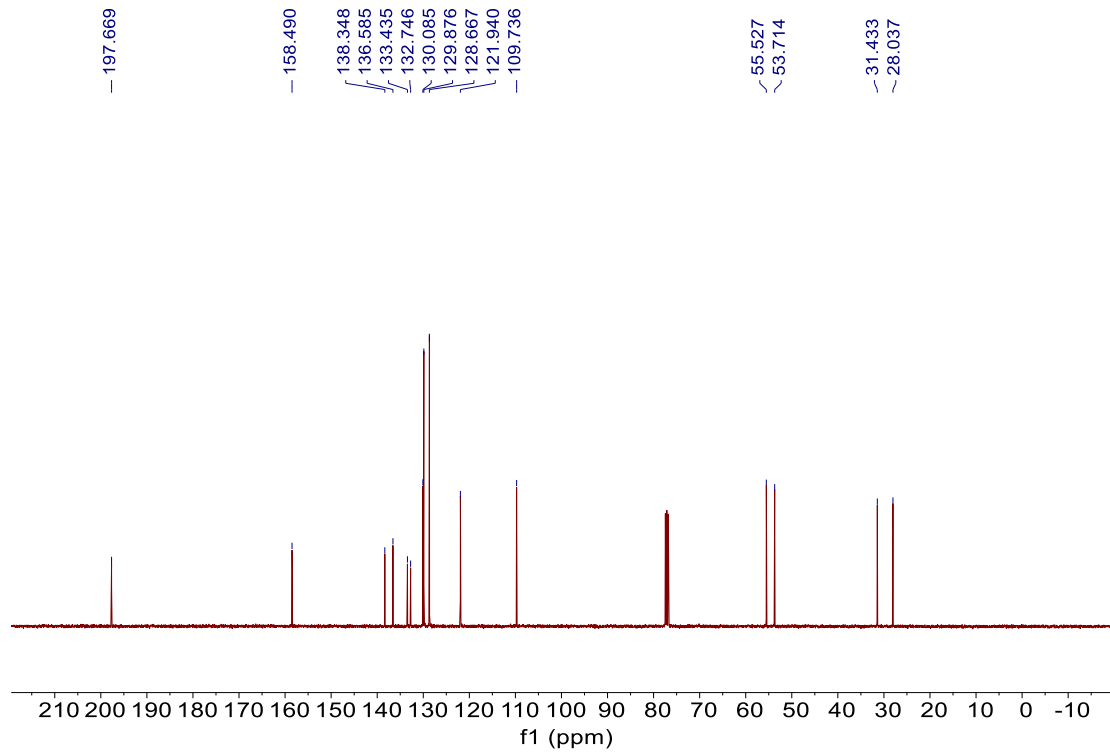



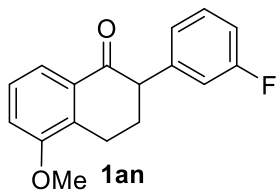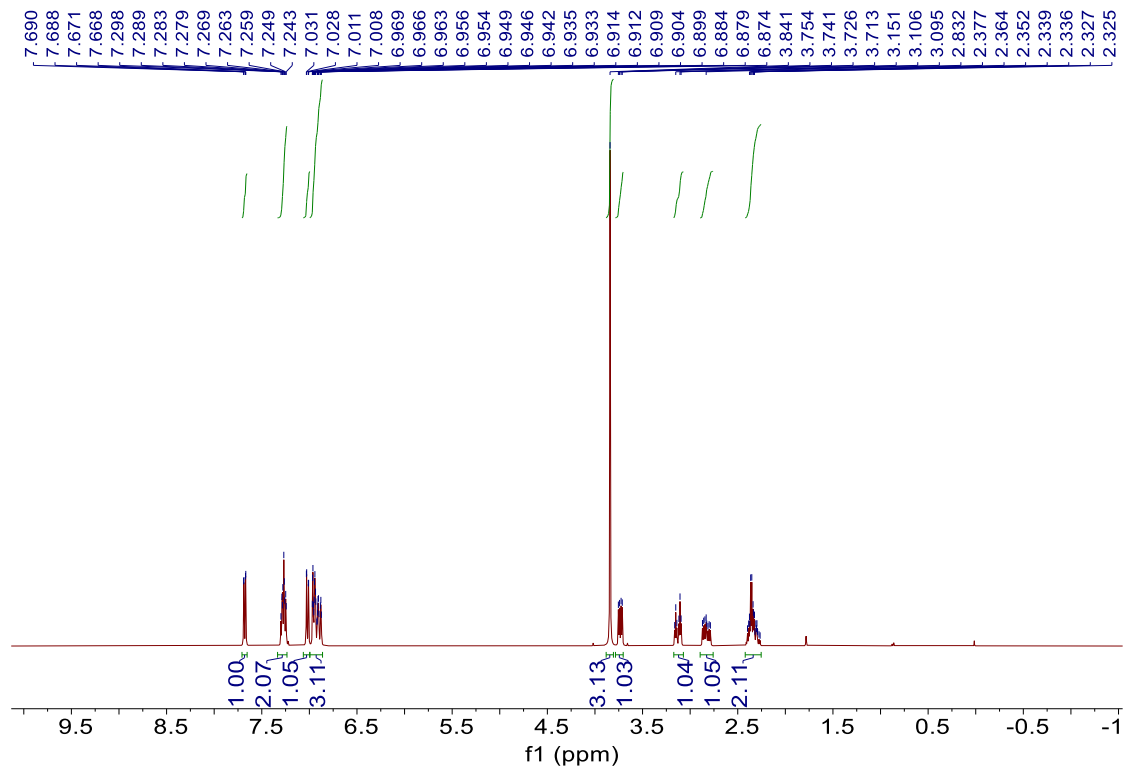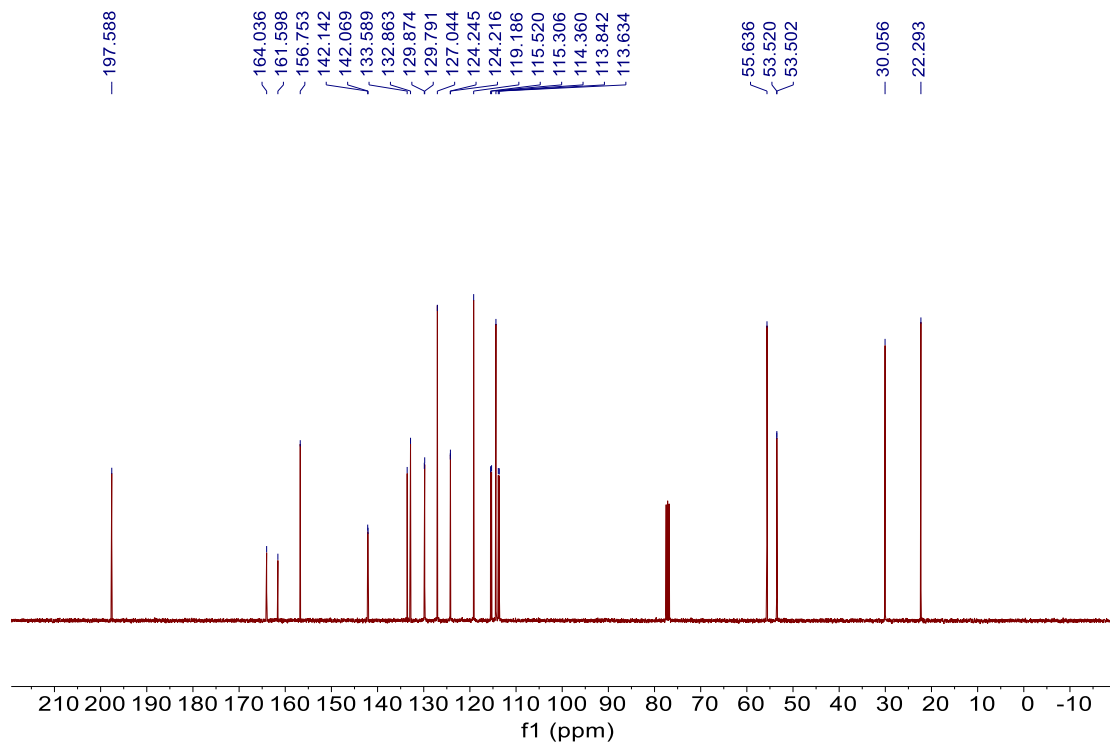

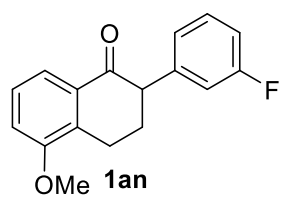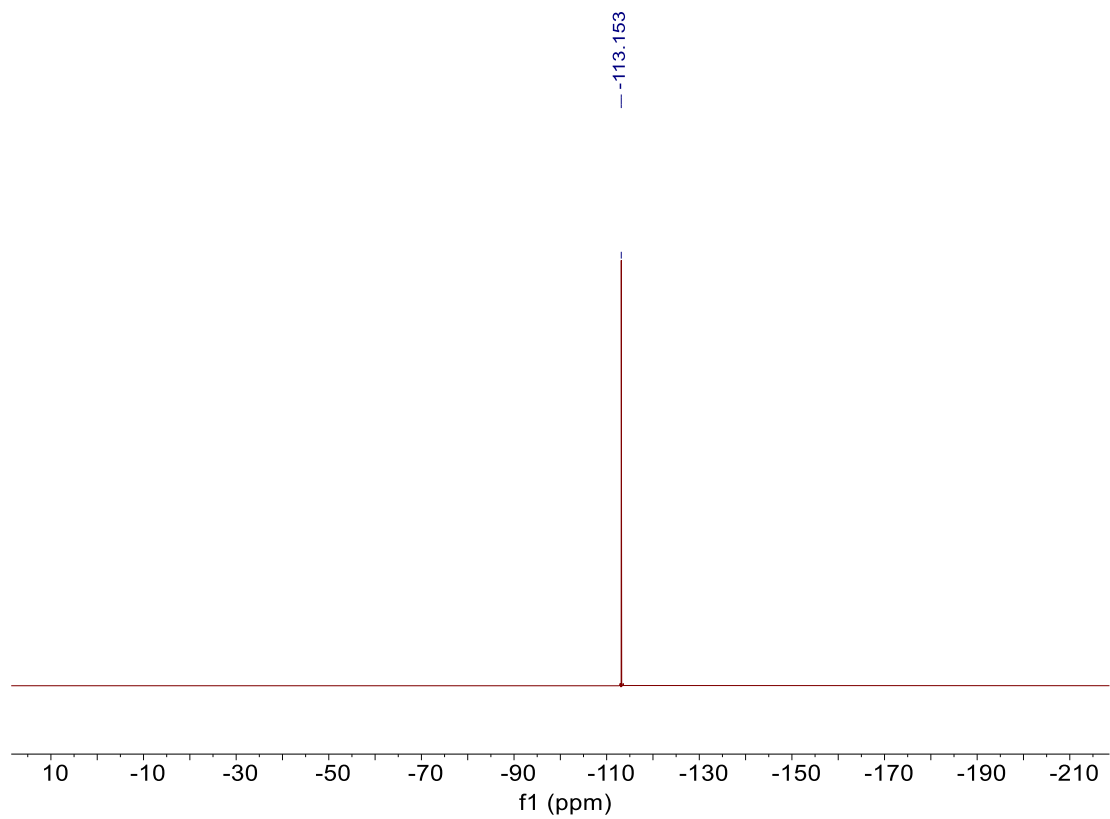

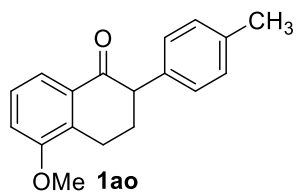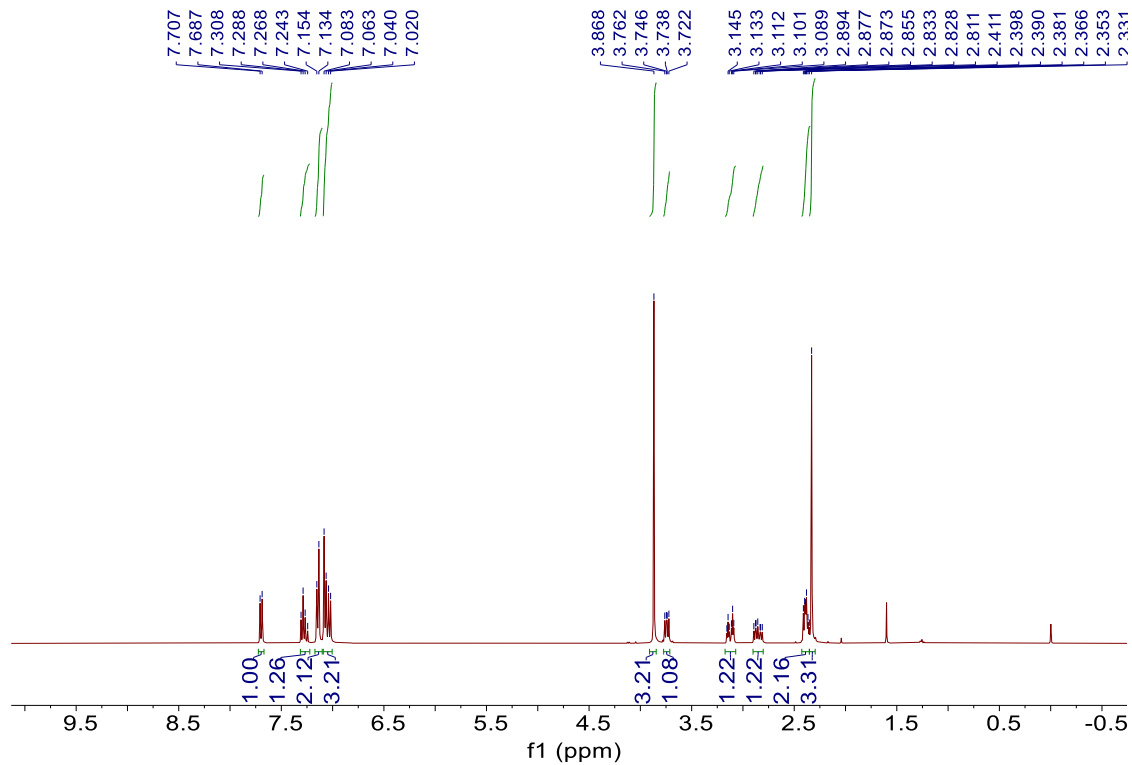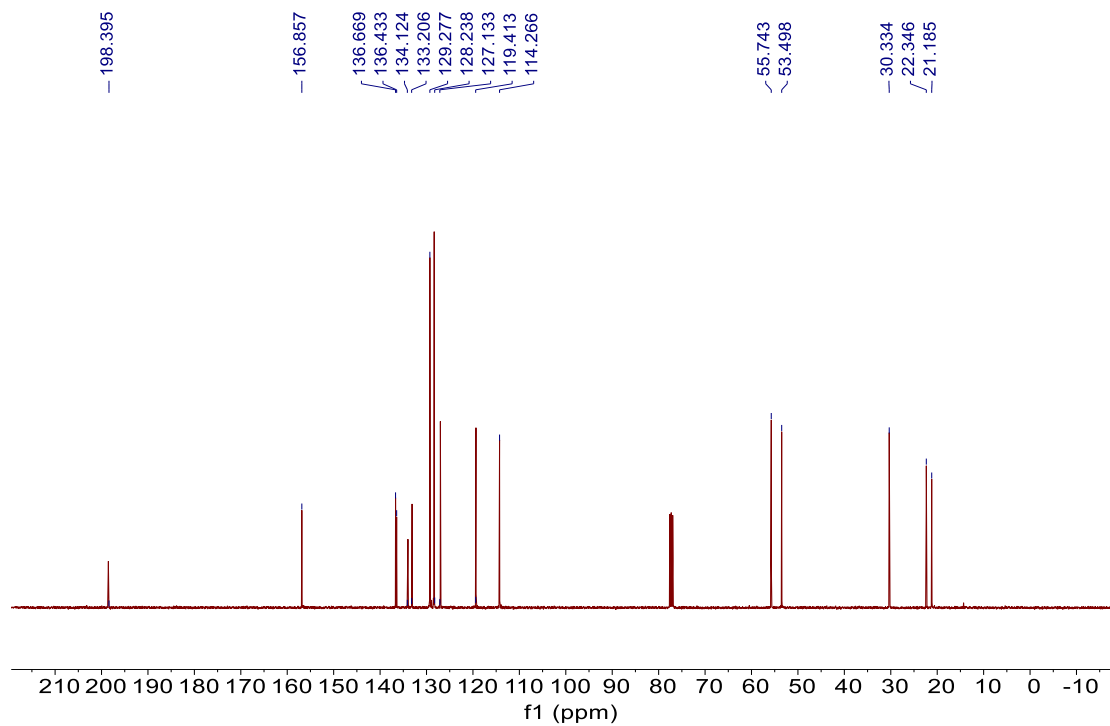

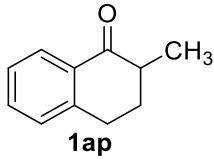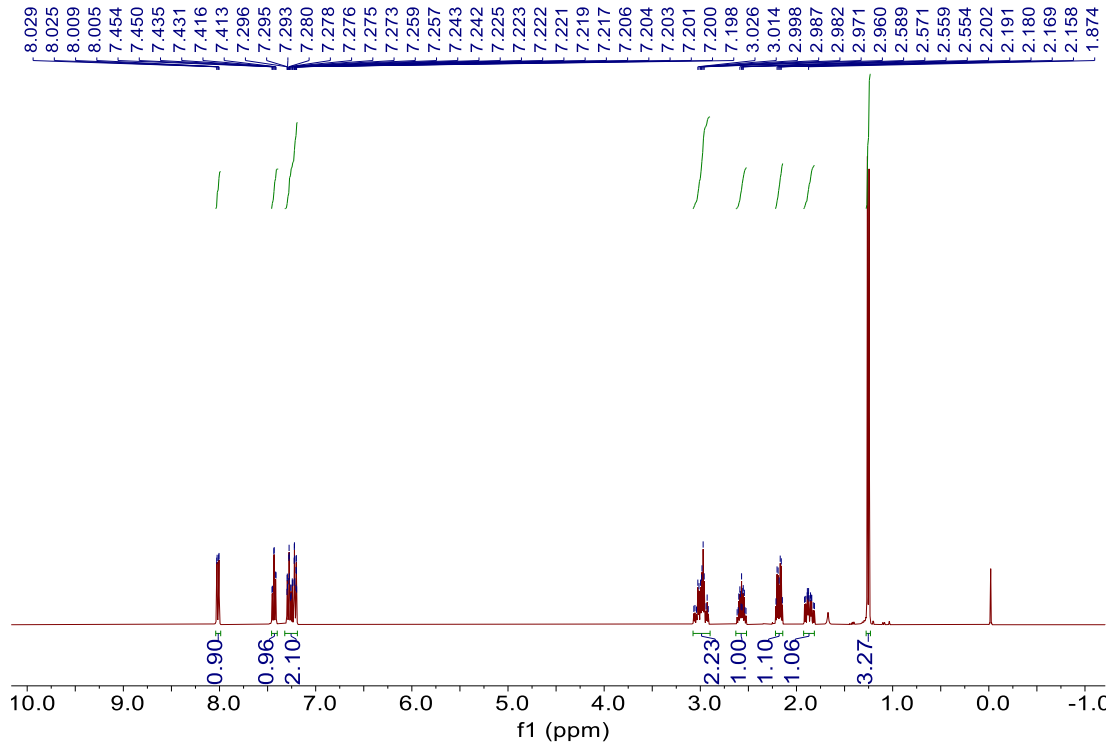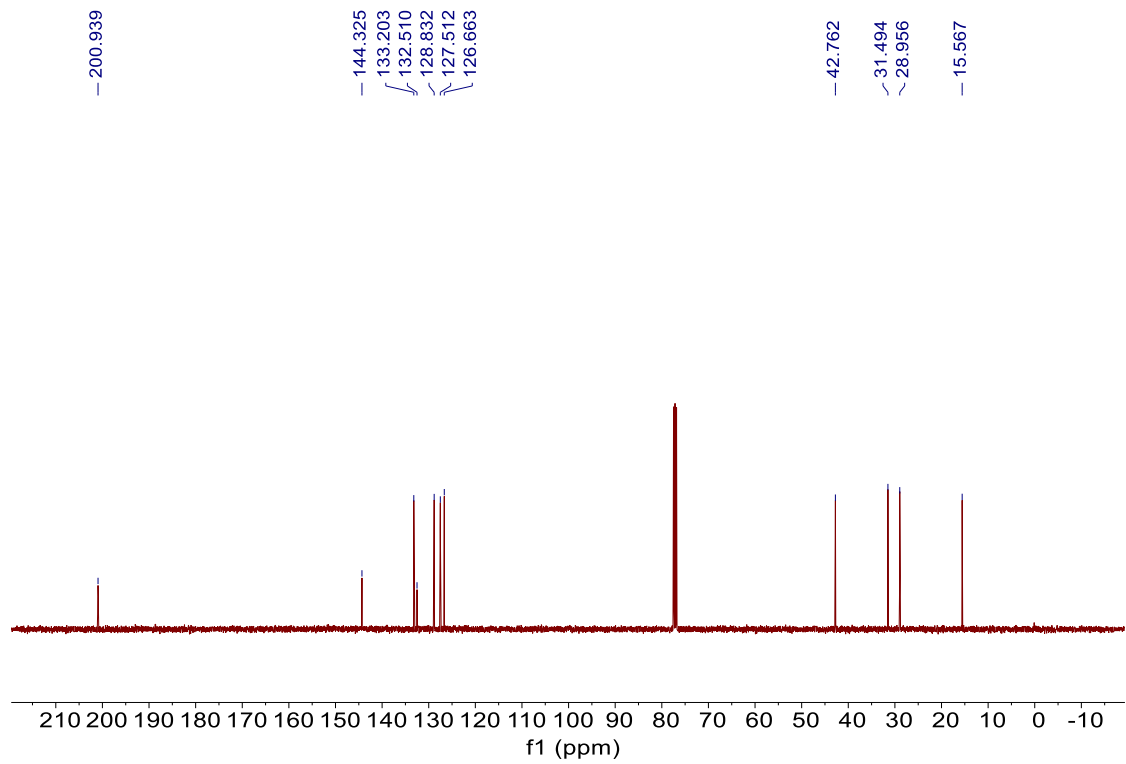

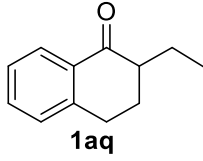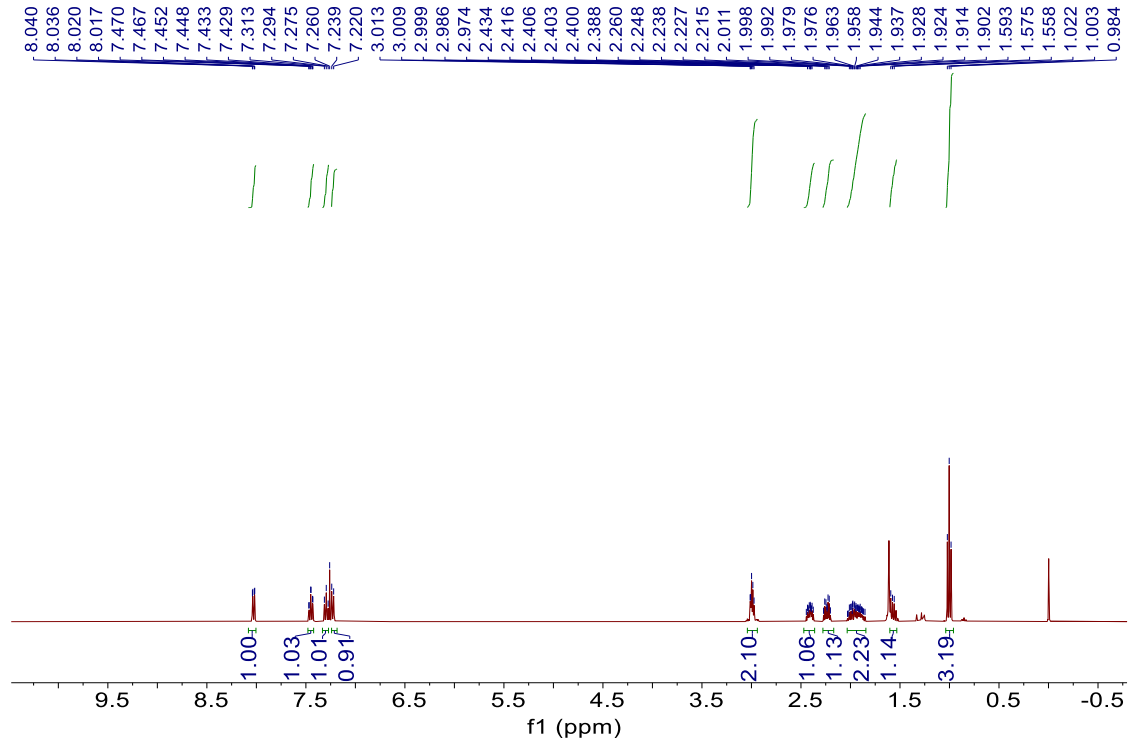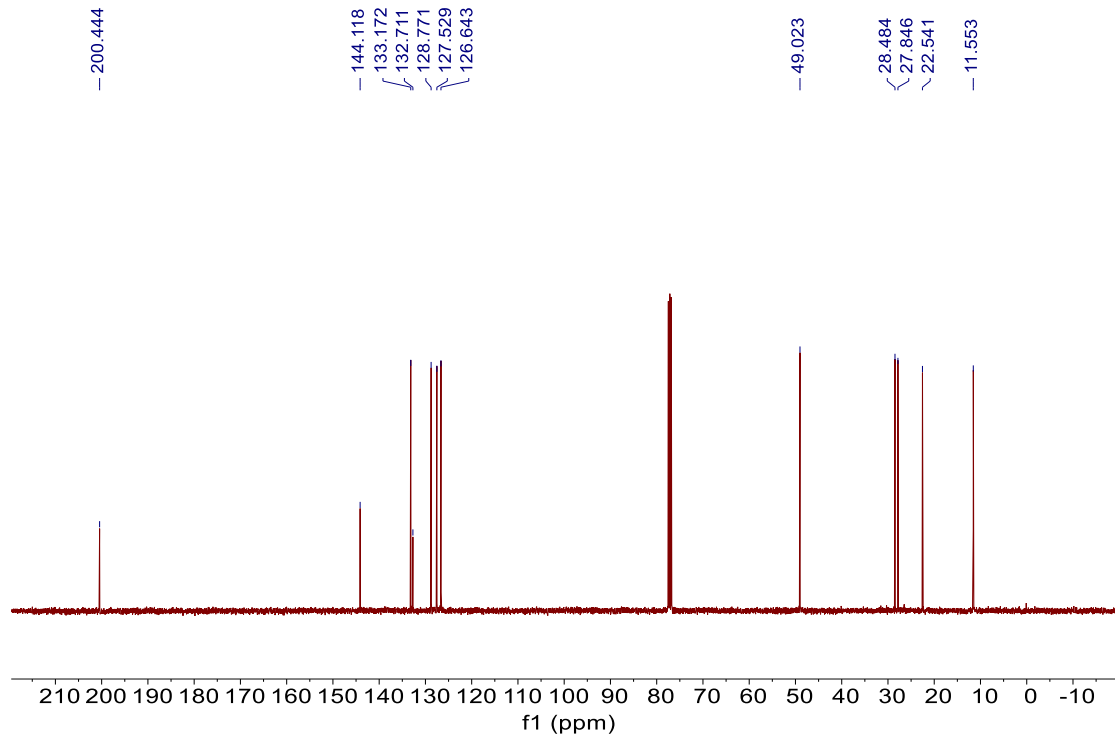

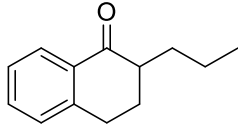

**1ar**

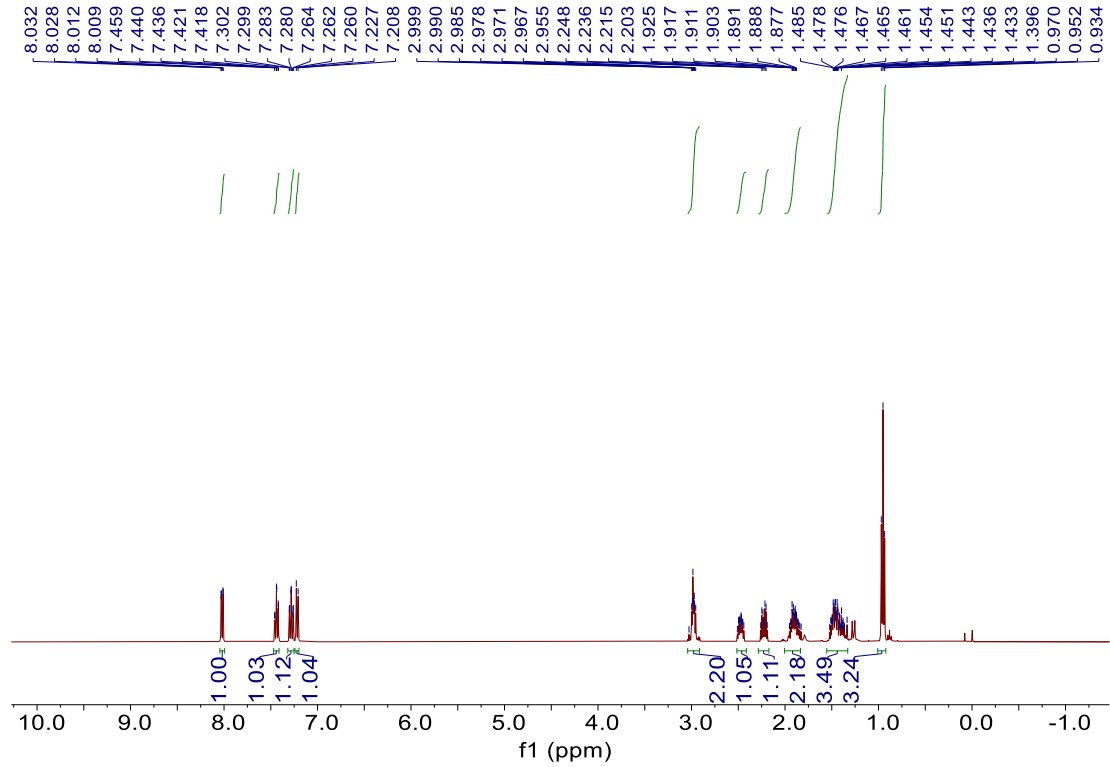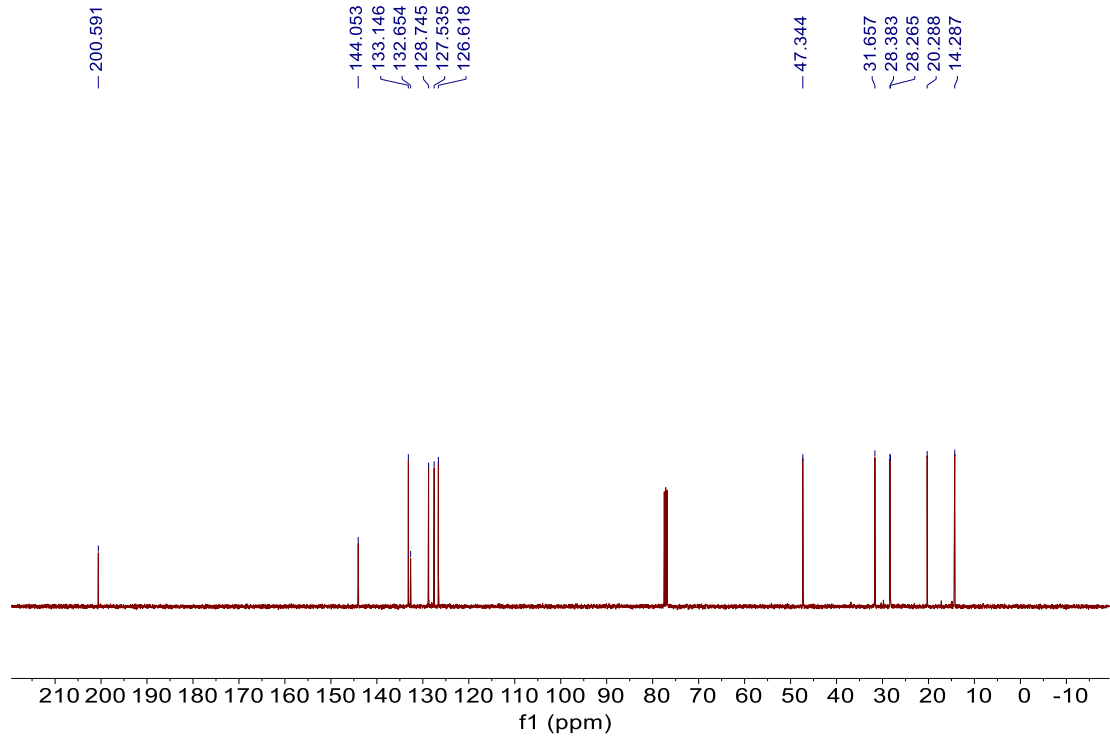

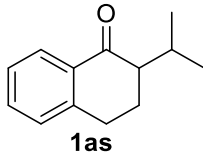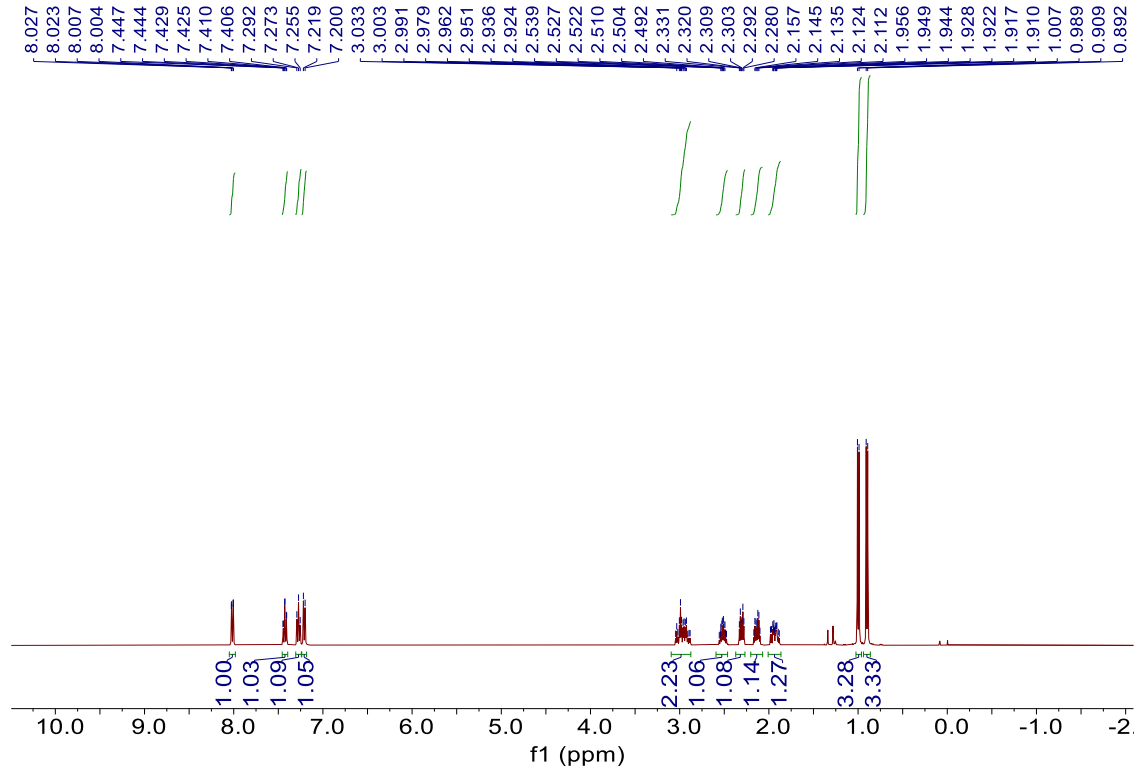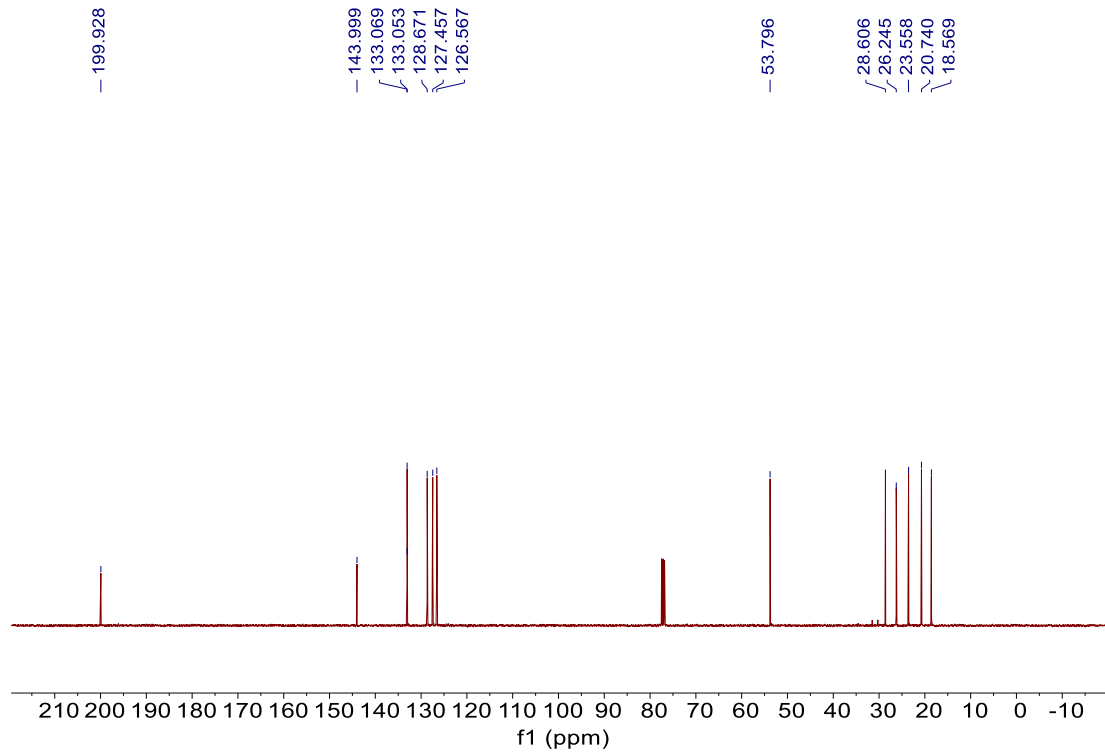

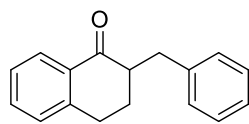

1at

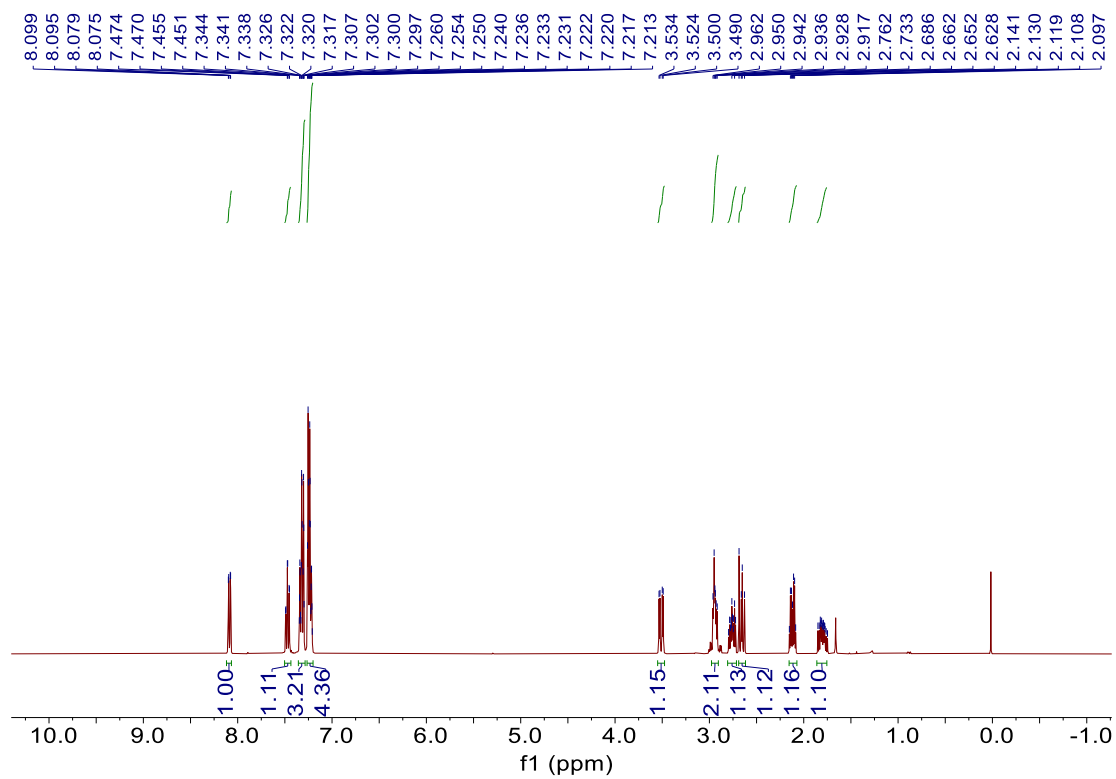



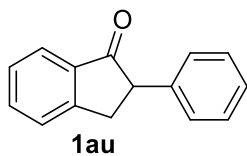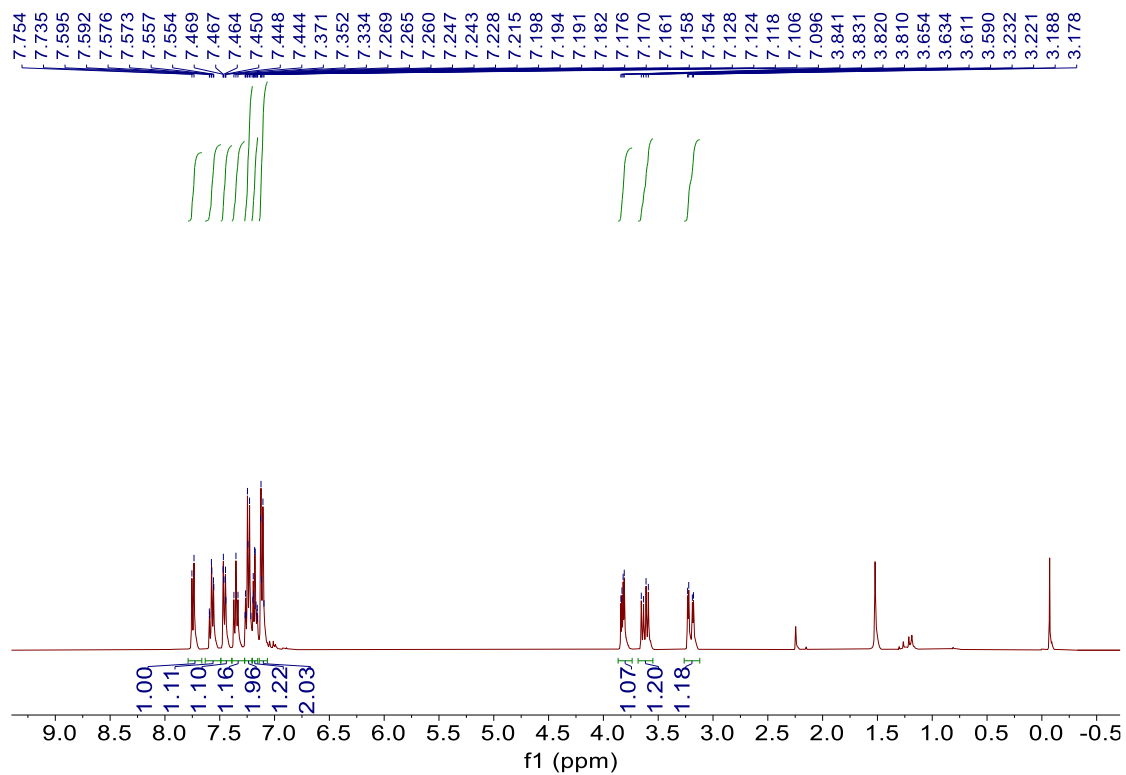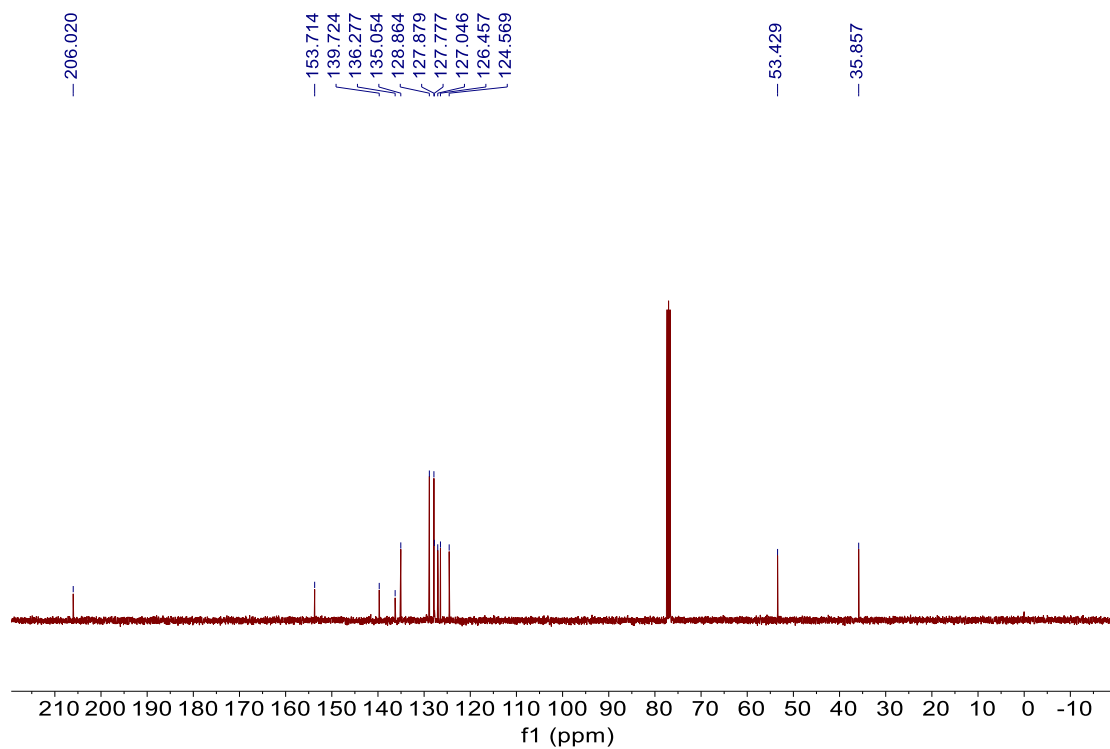

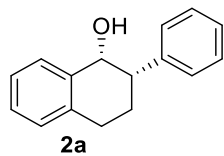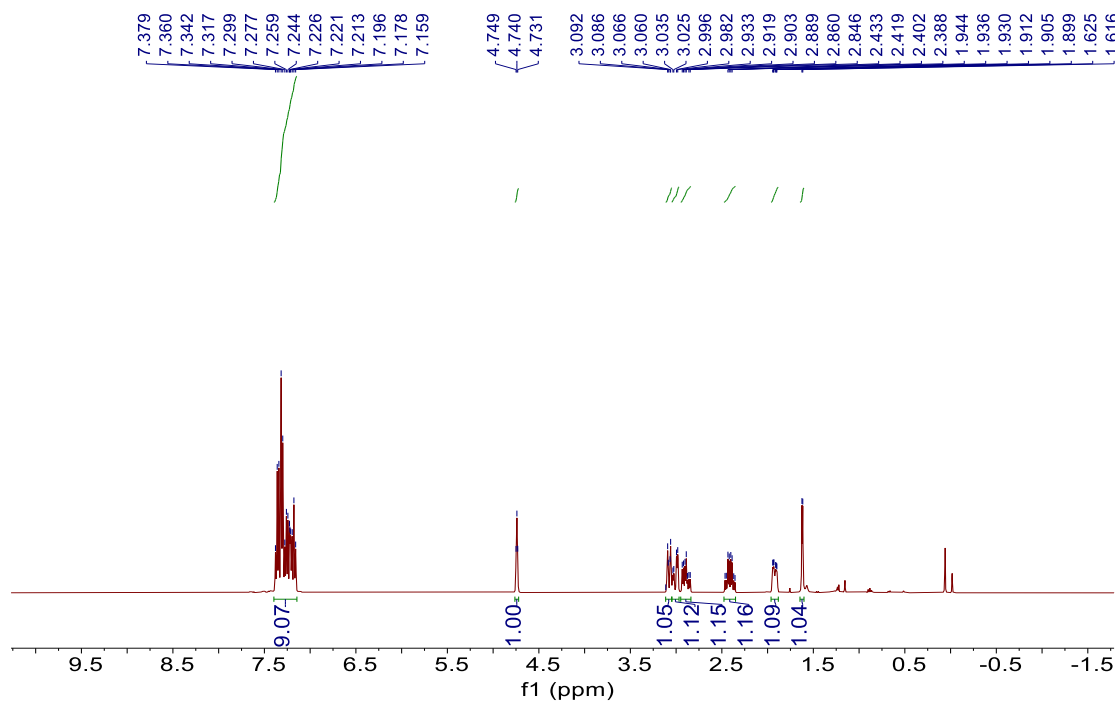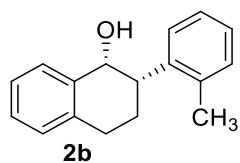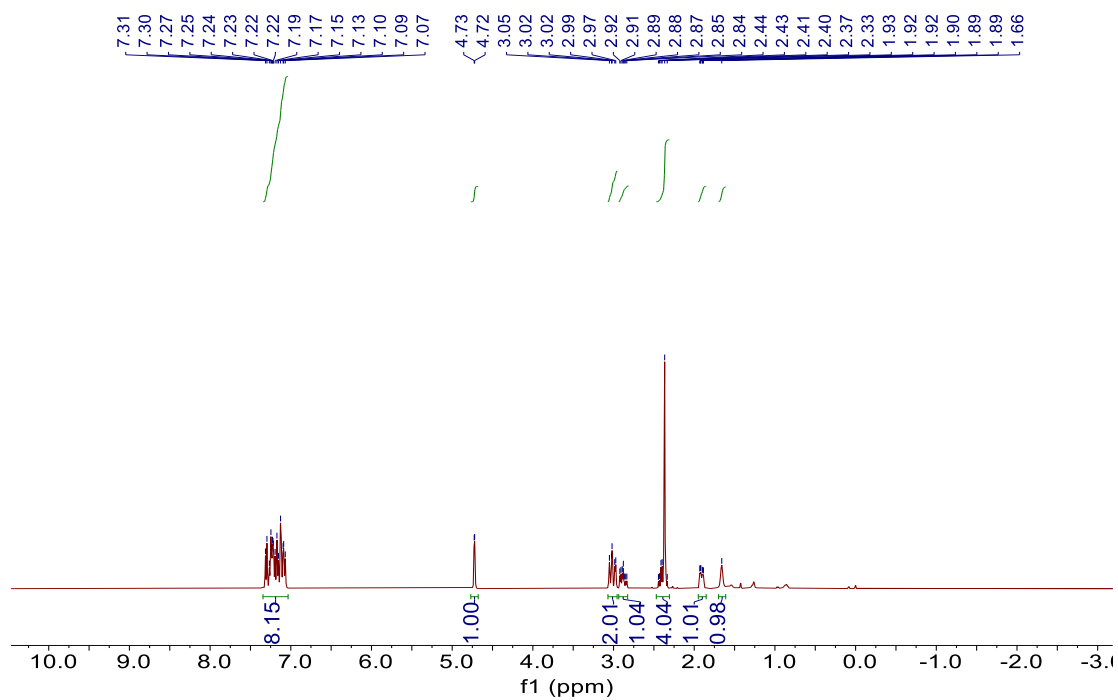

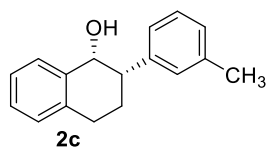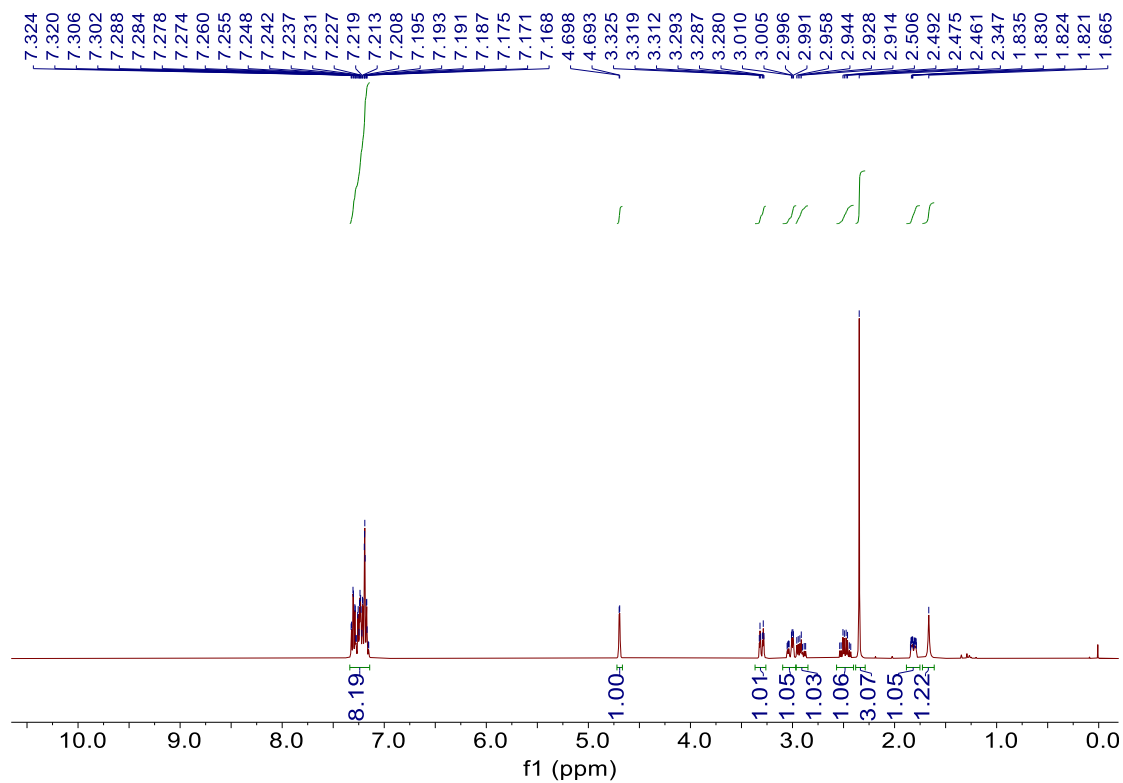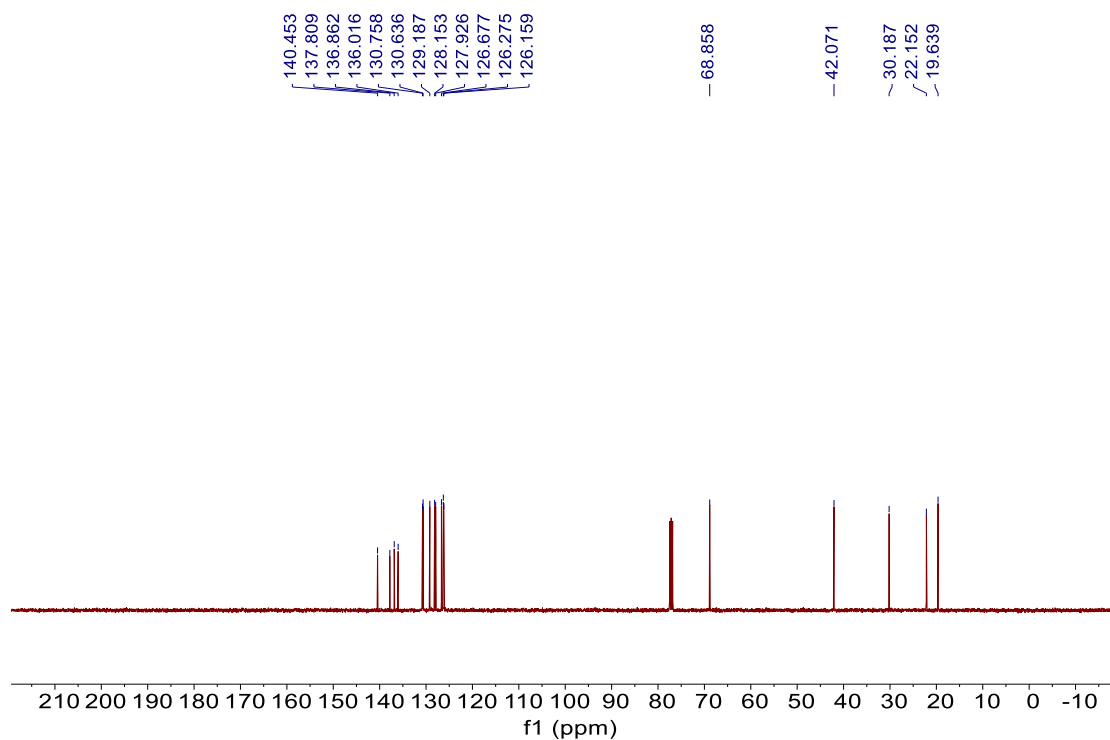

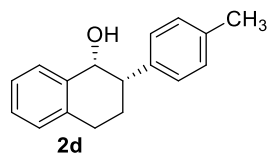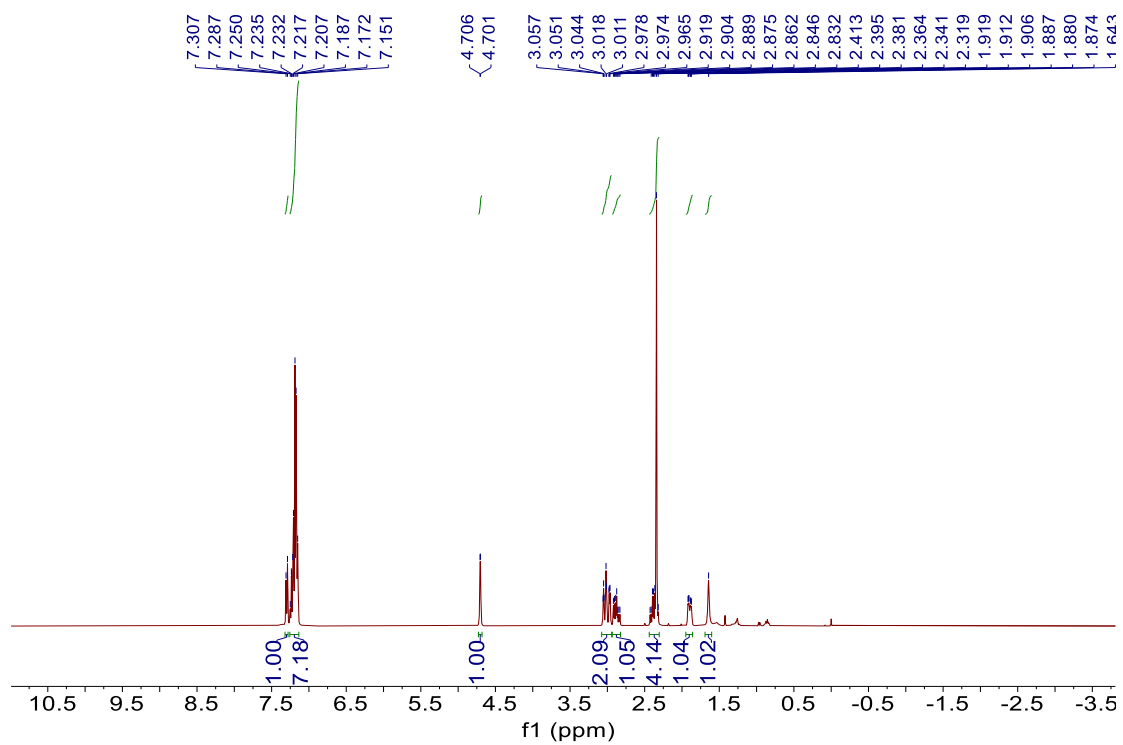

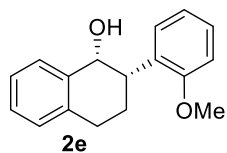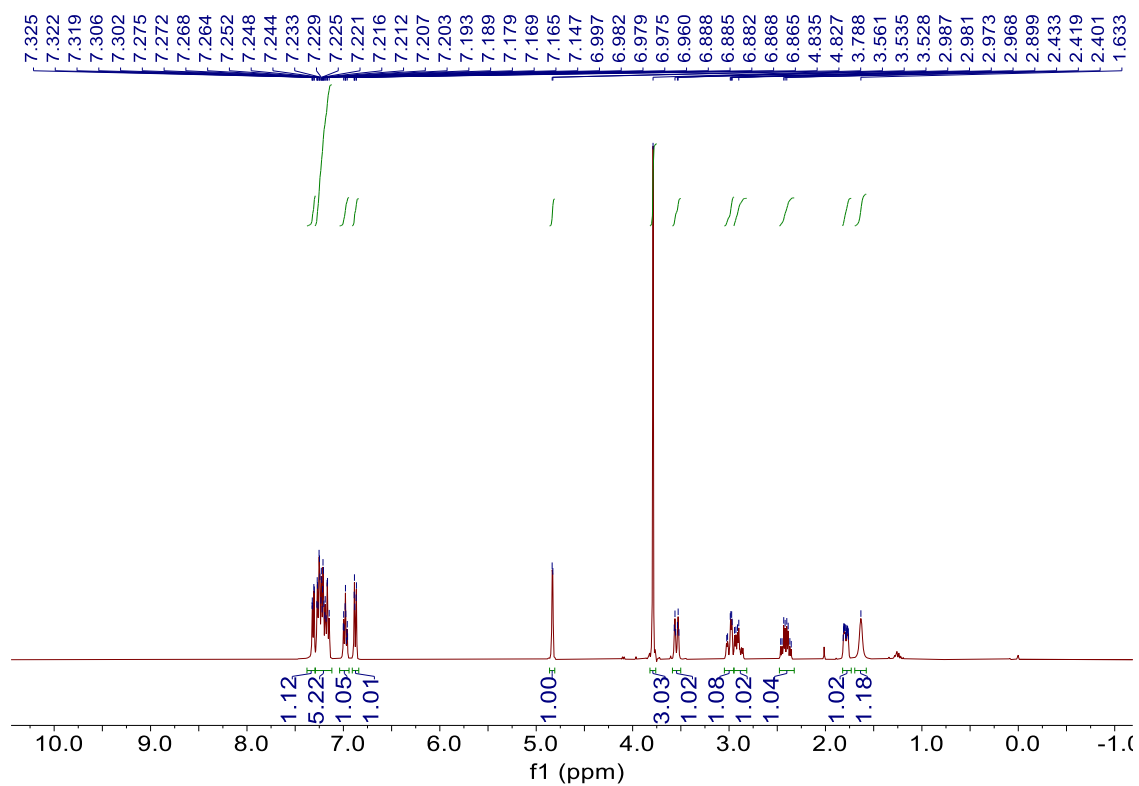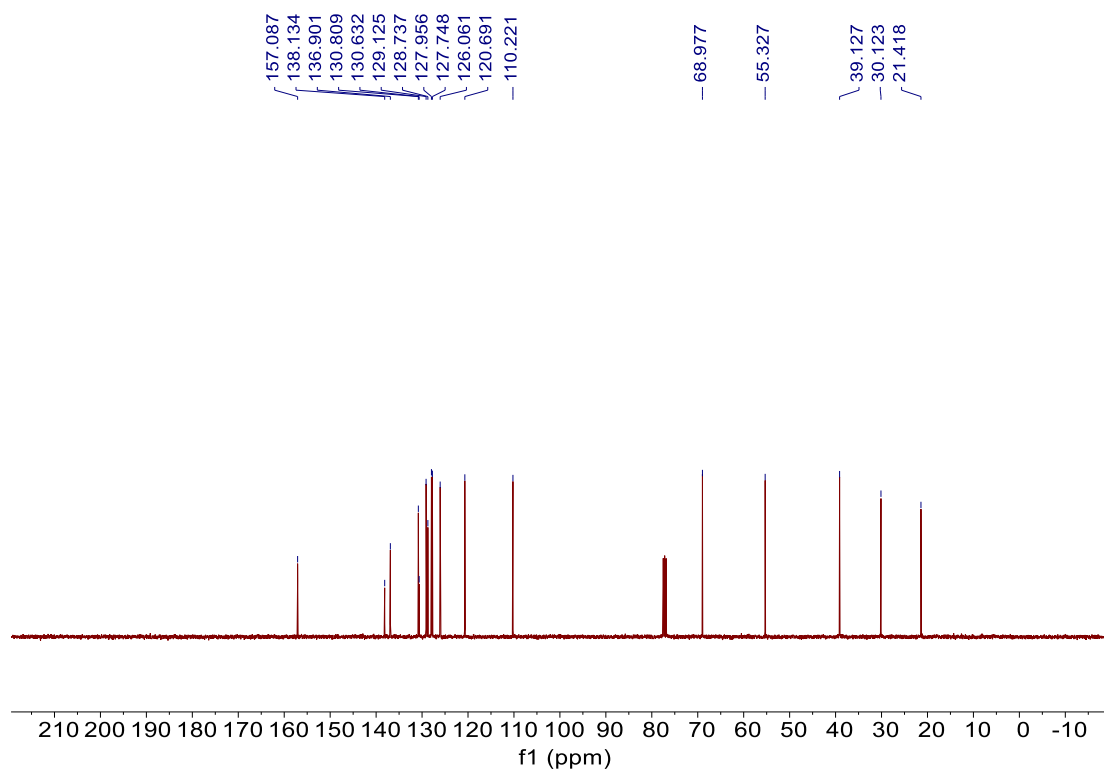

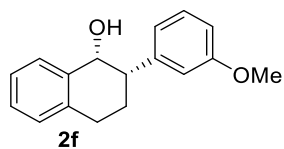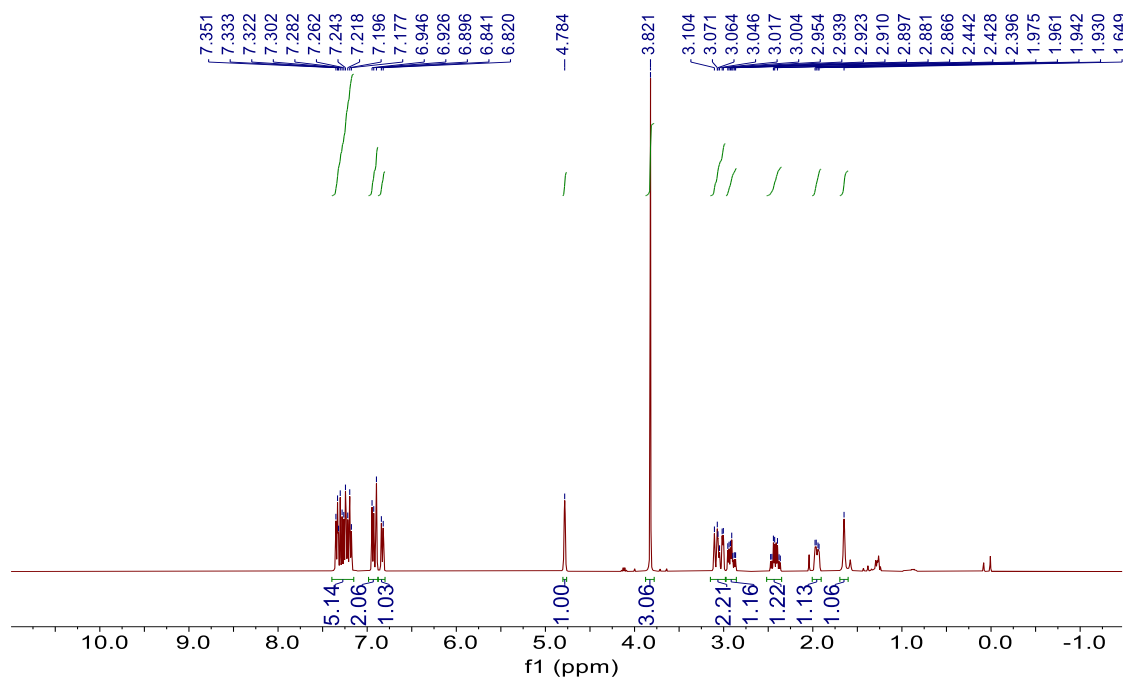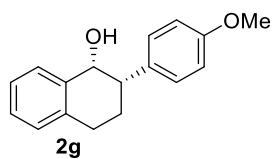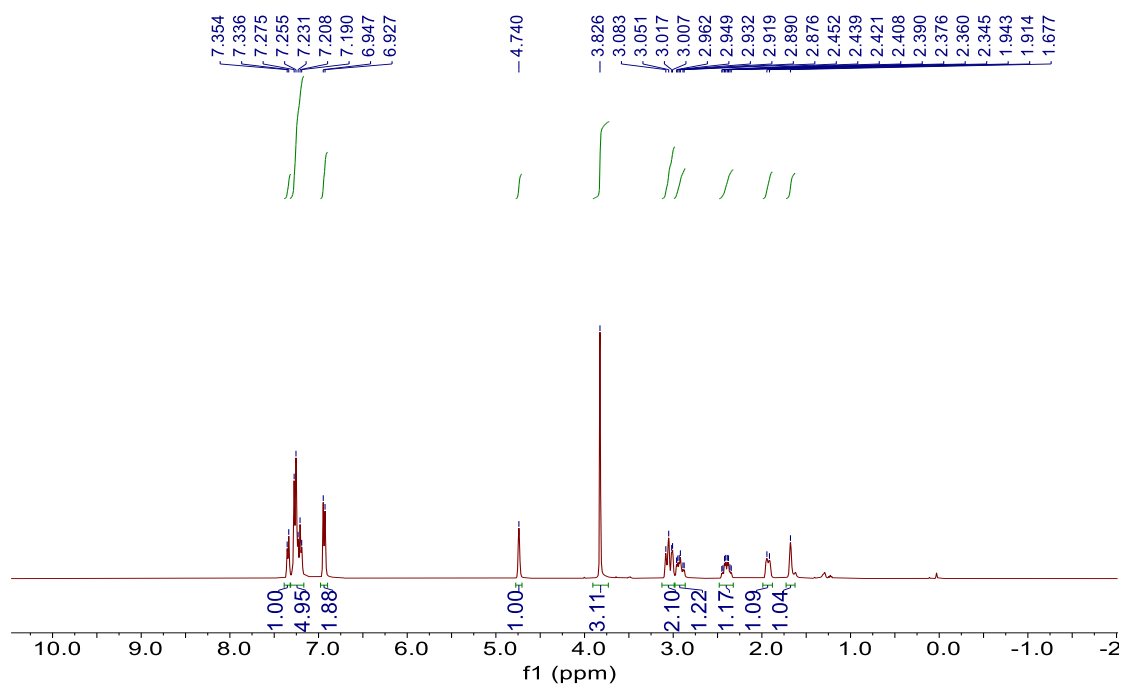

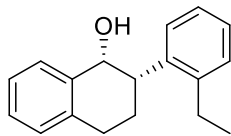

**2h**

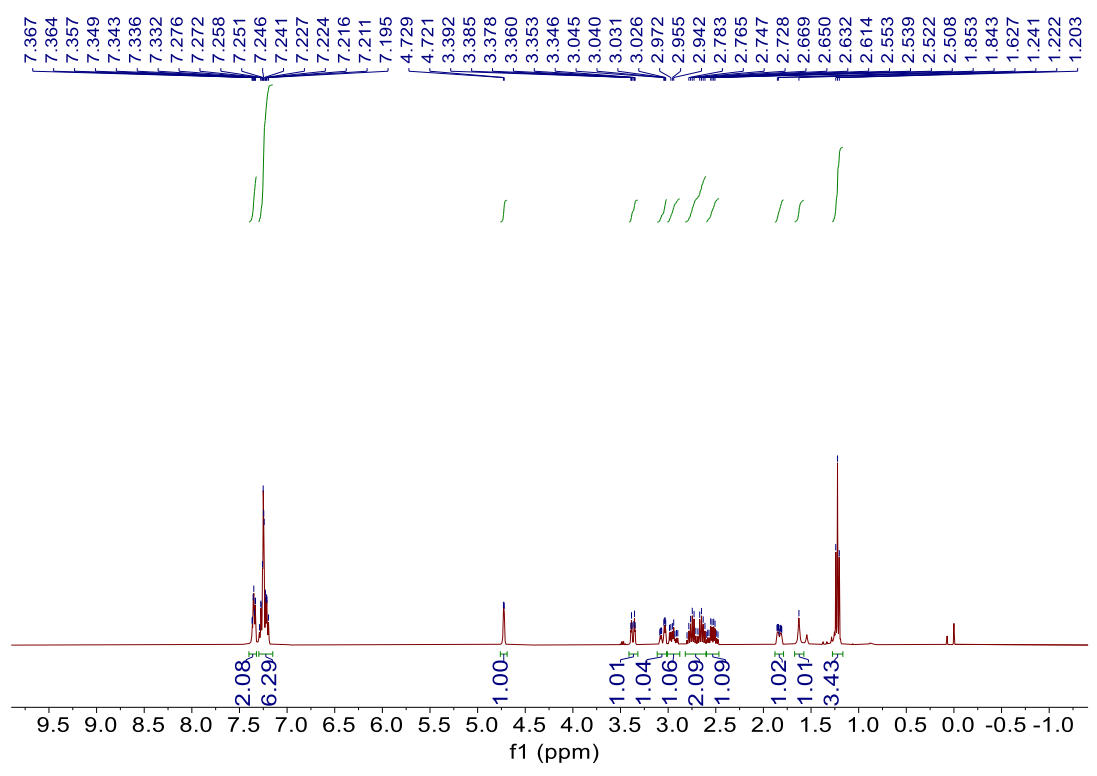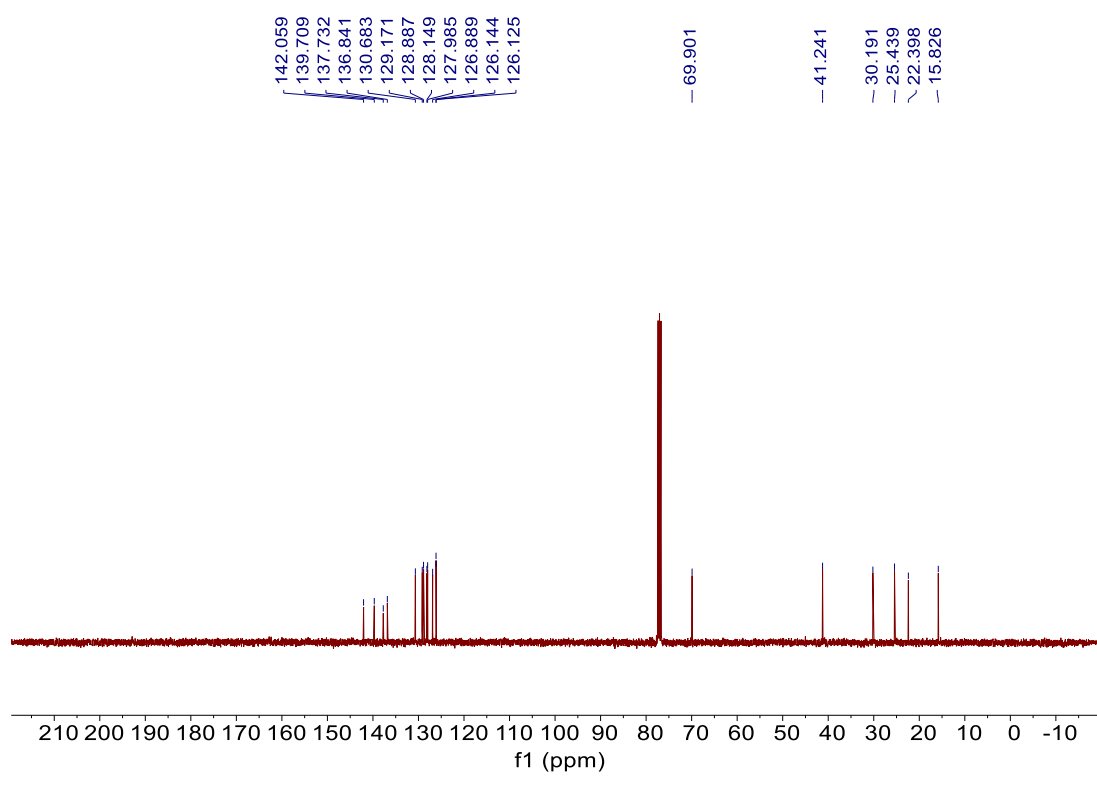

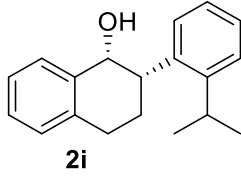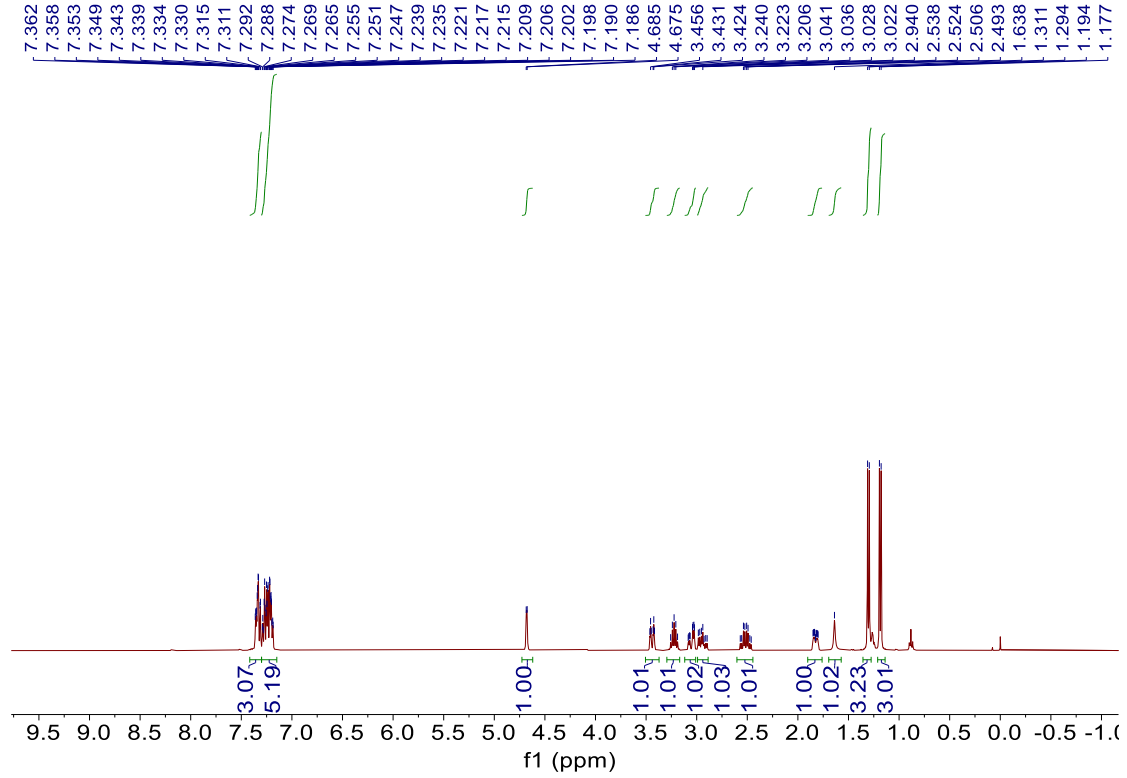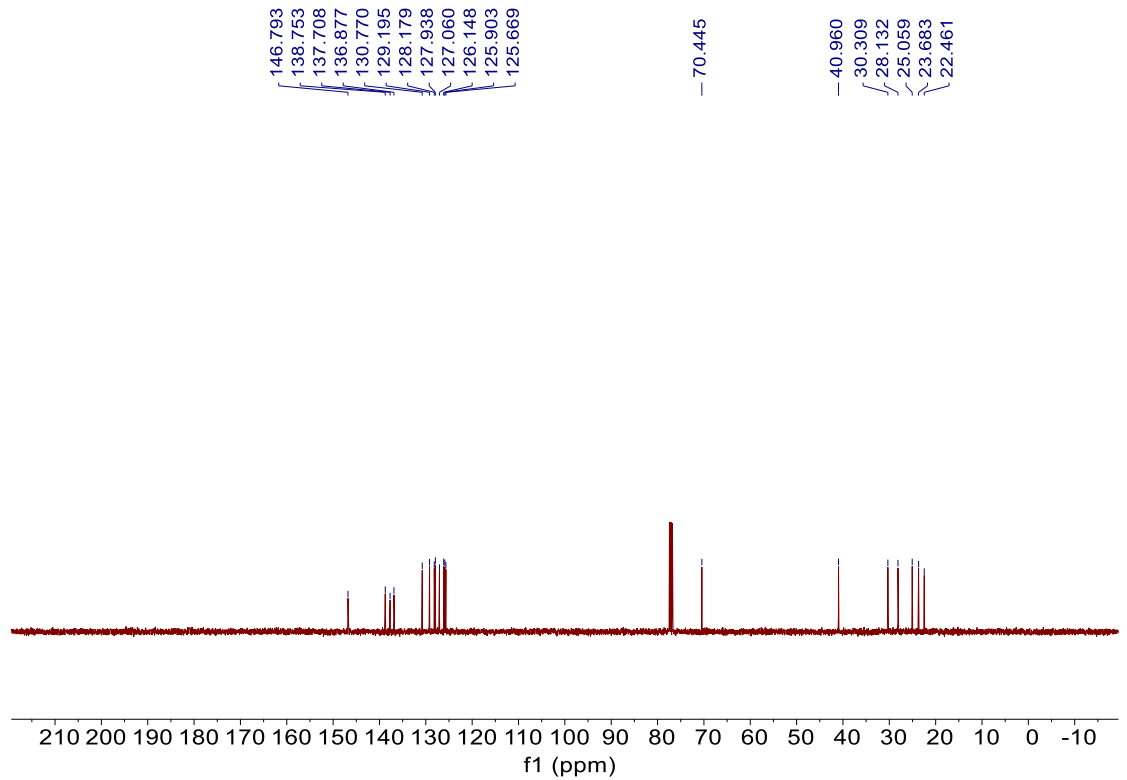



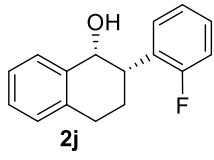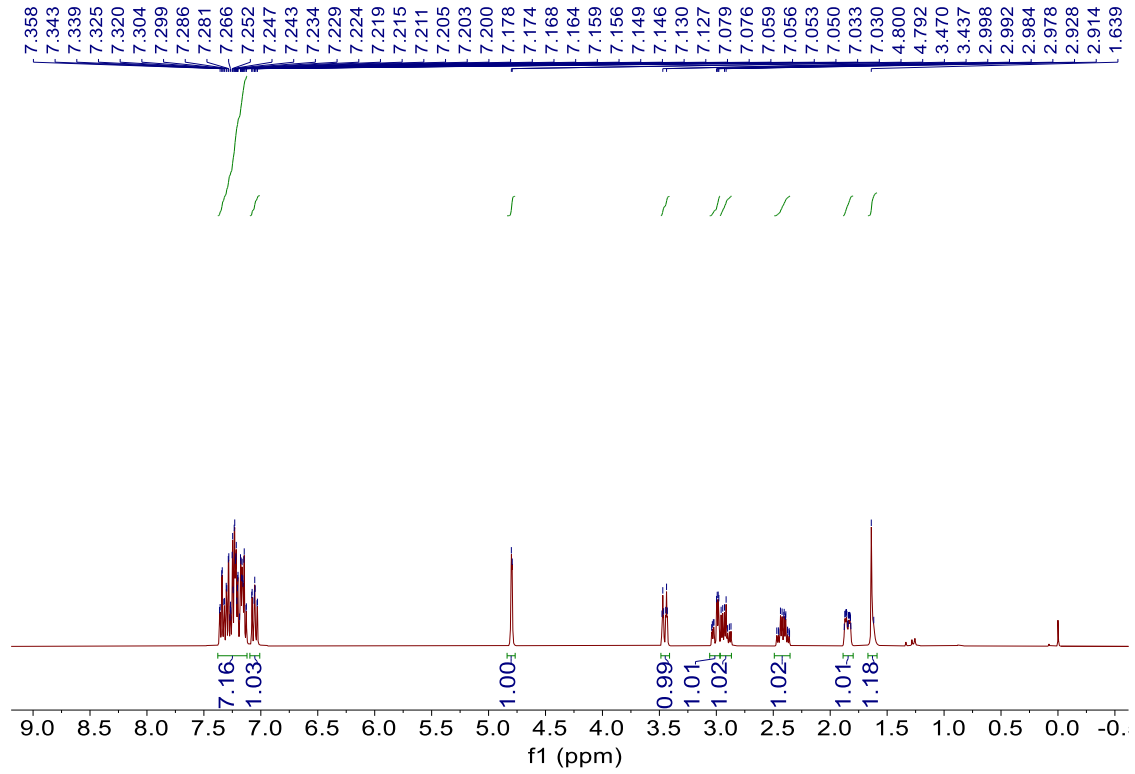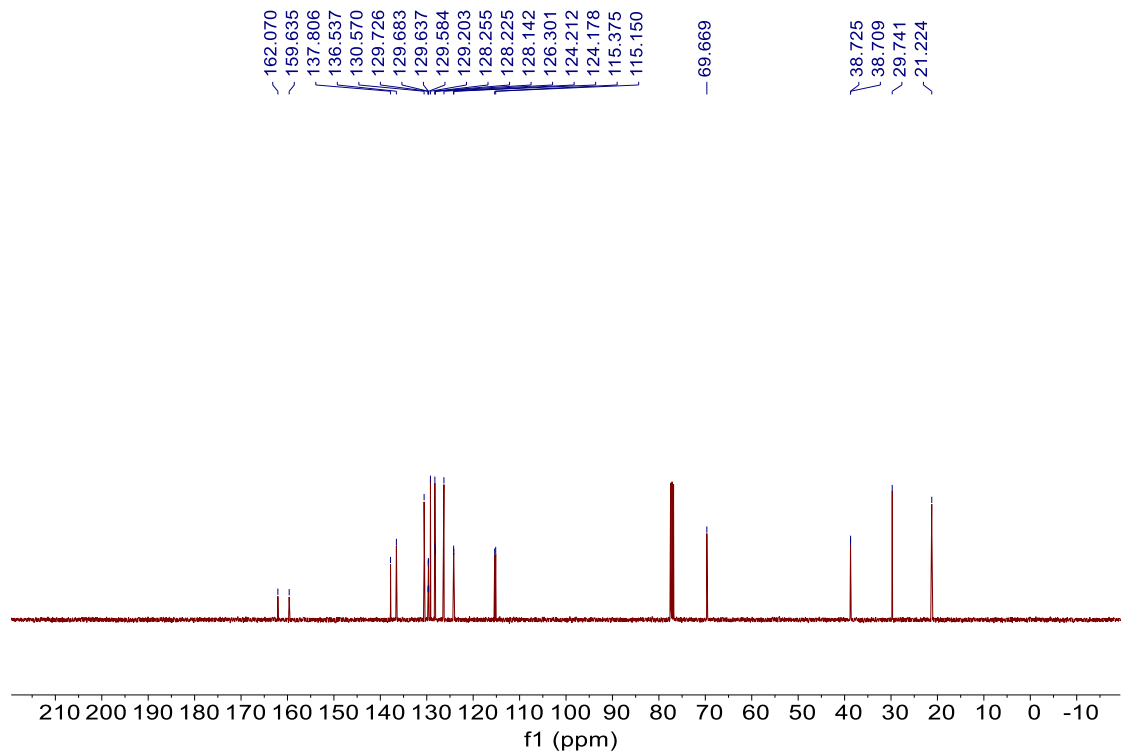

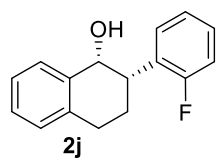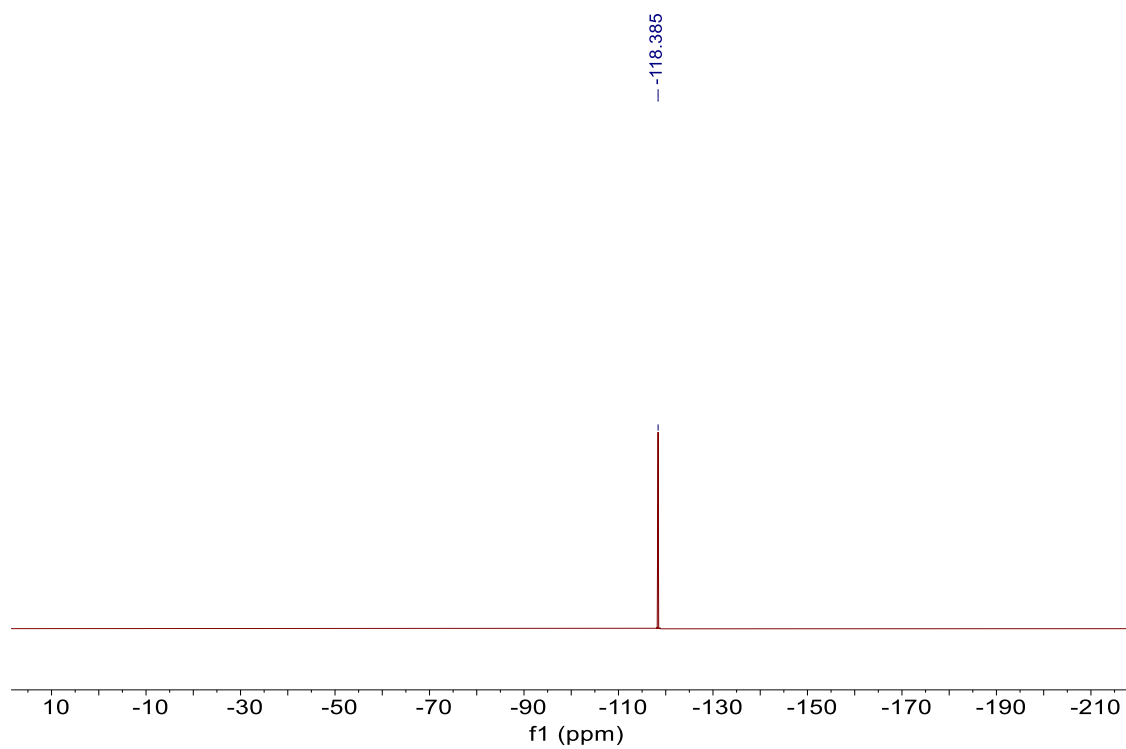

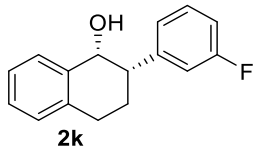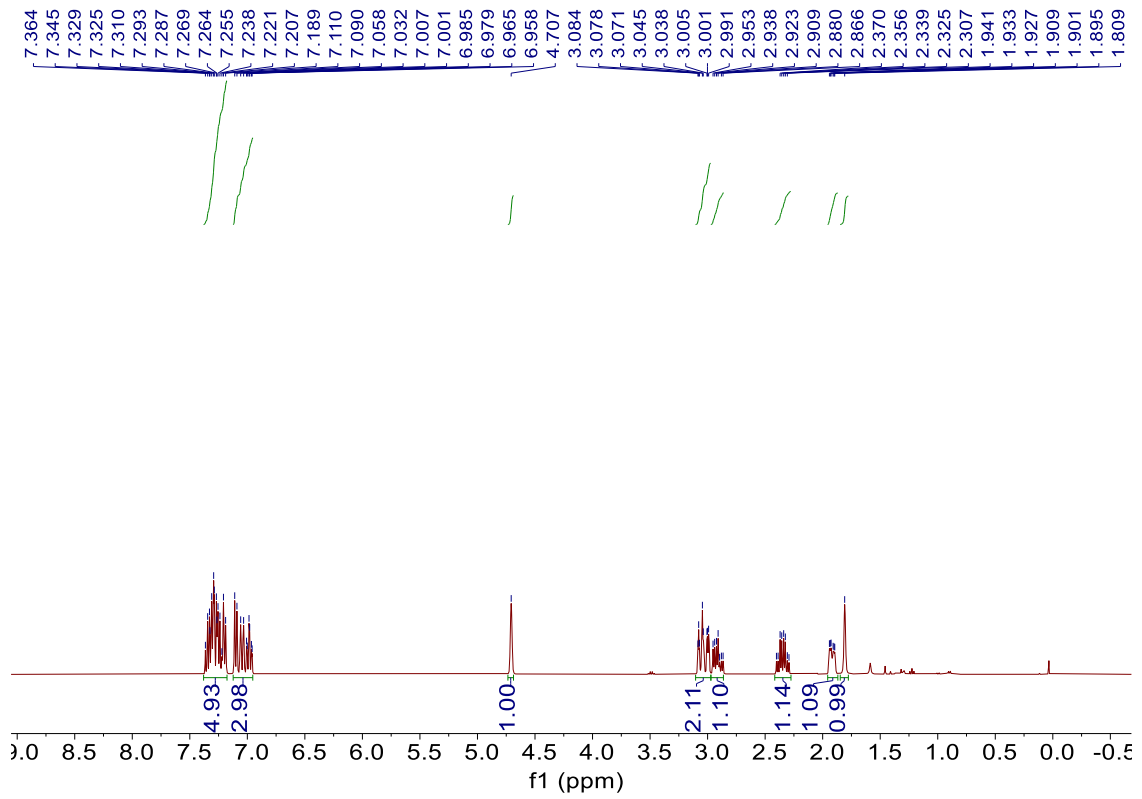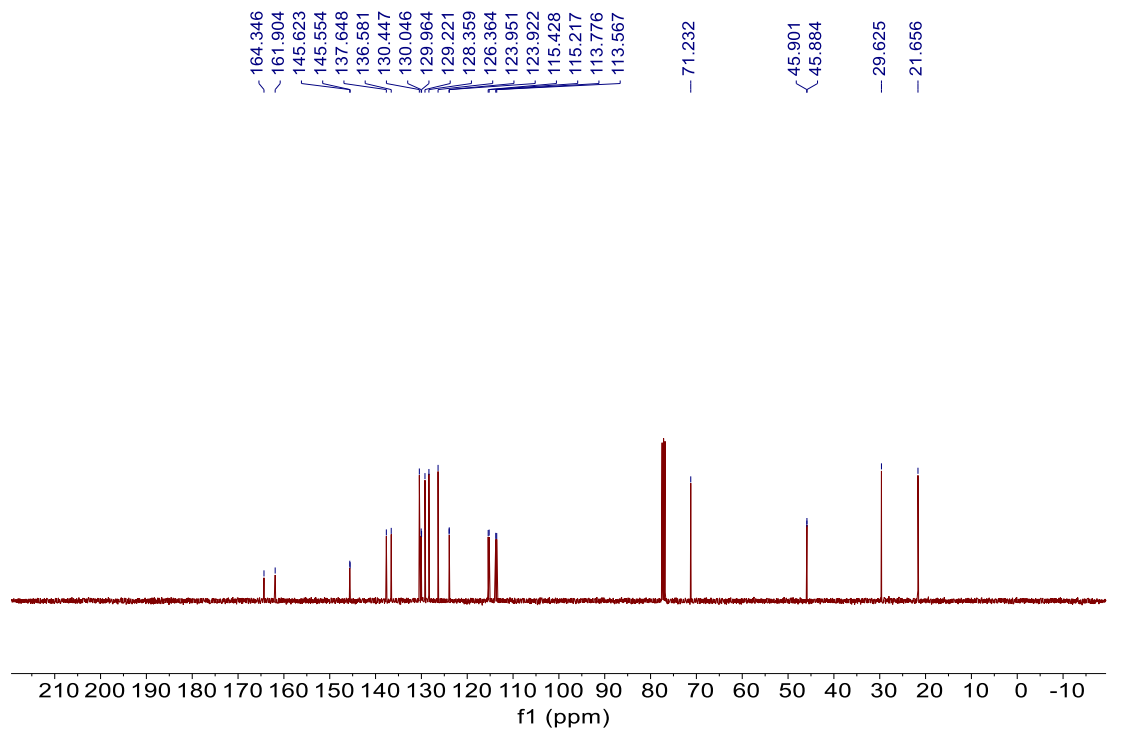

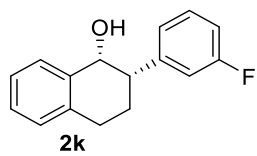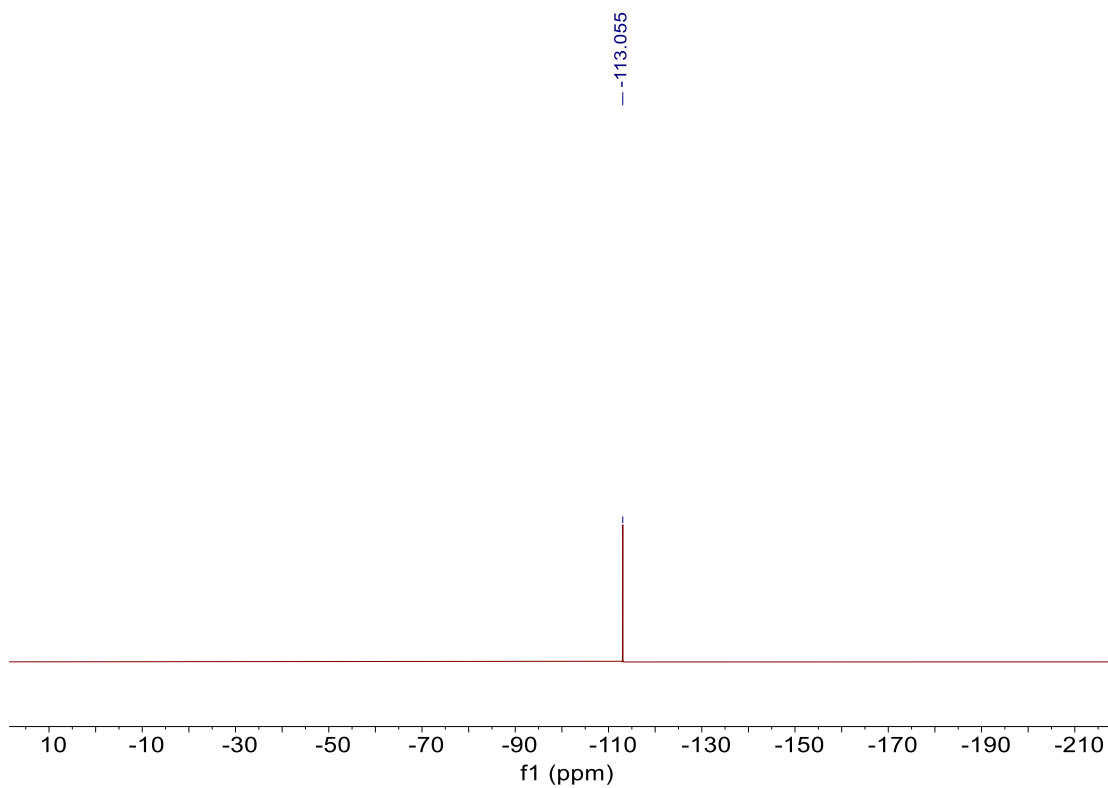

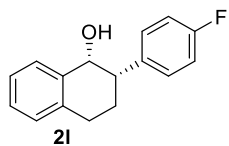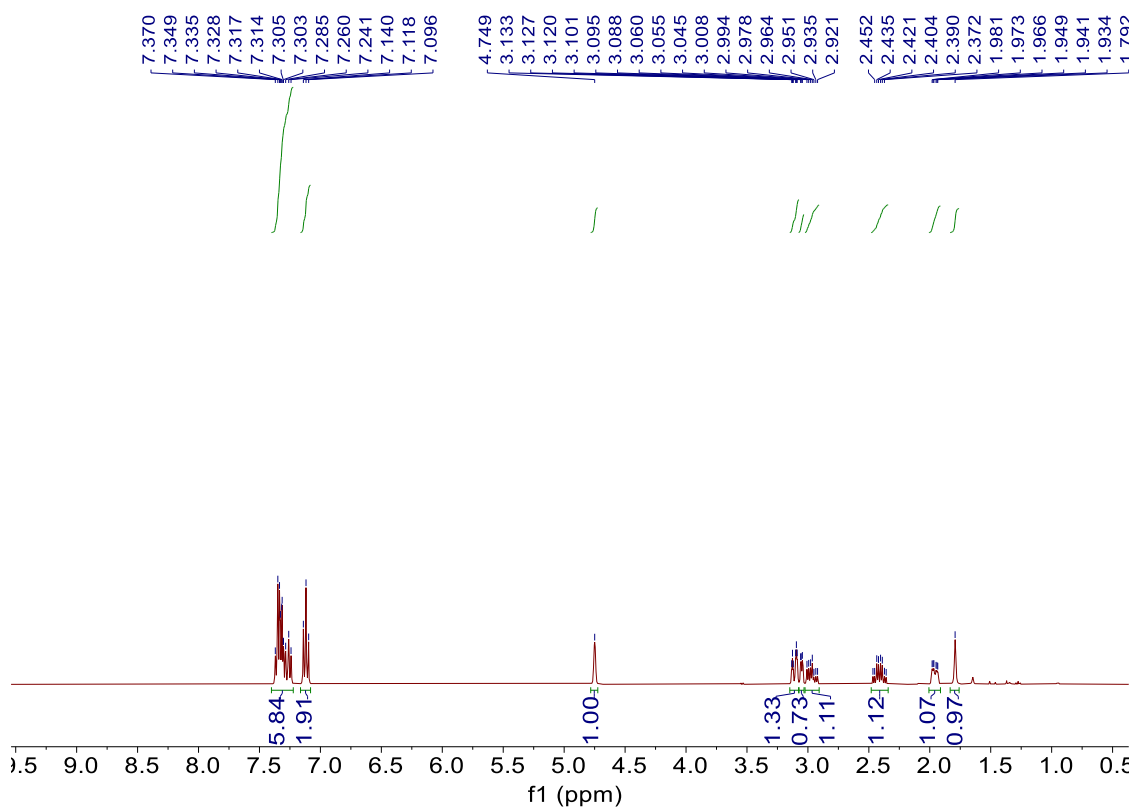

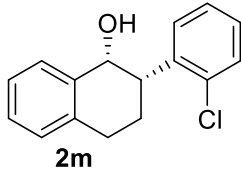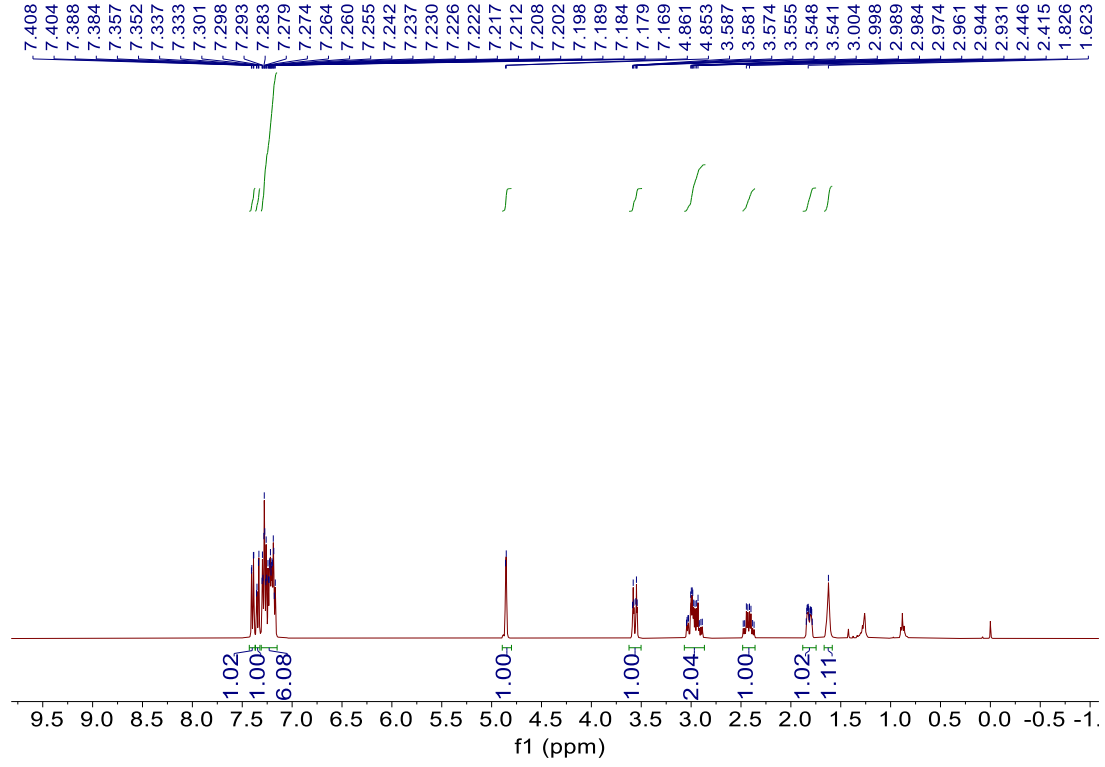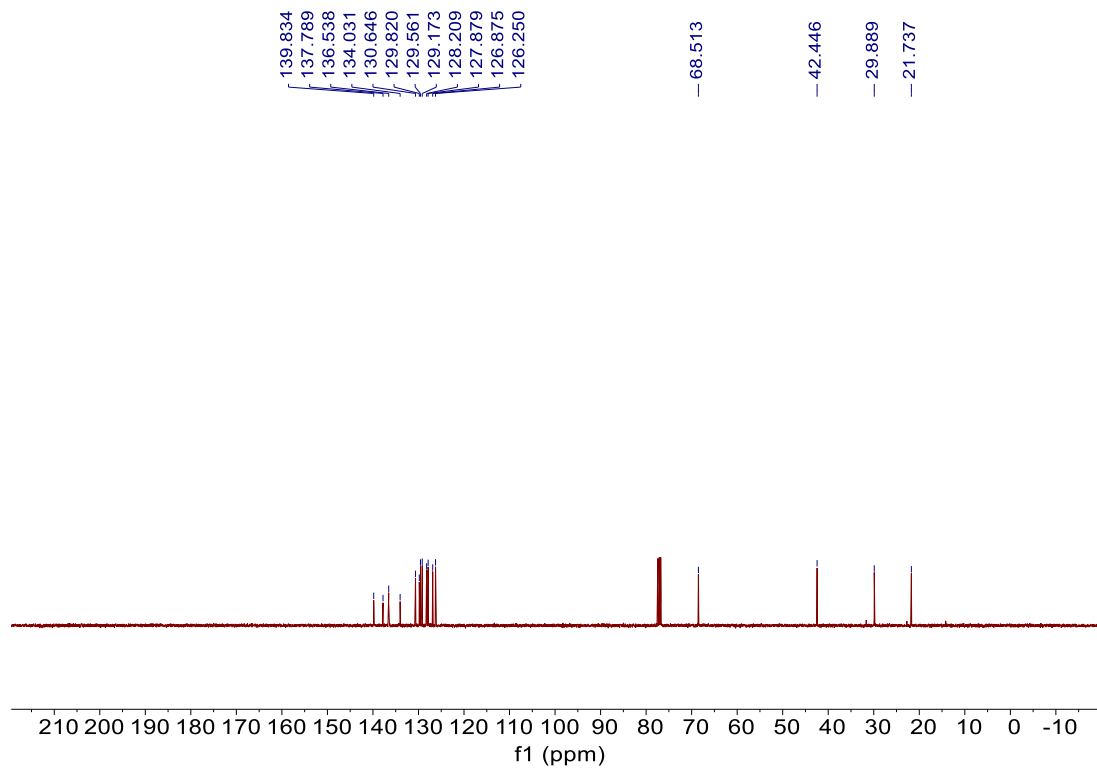

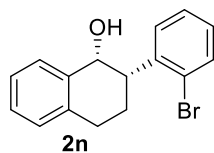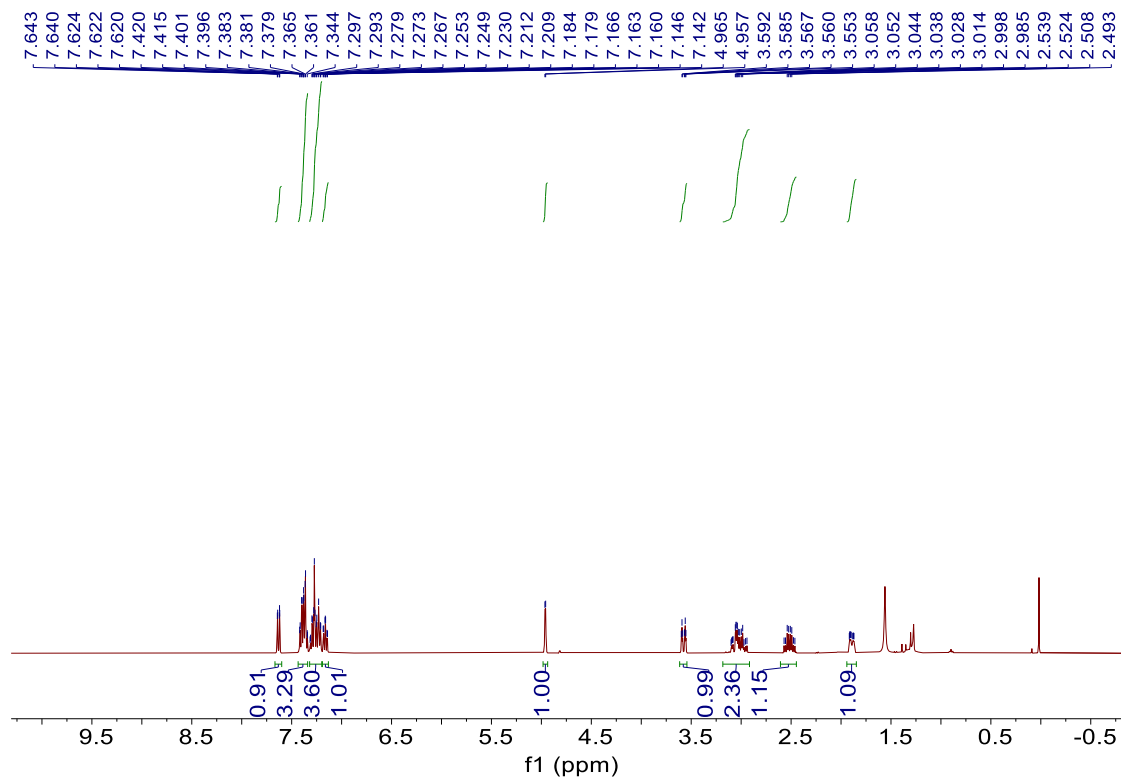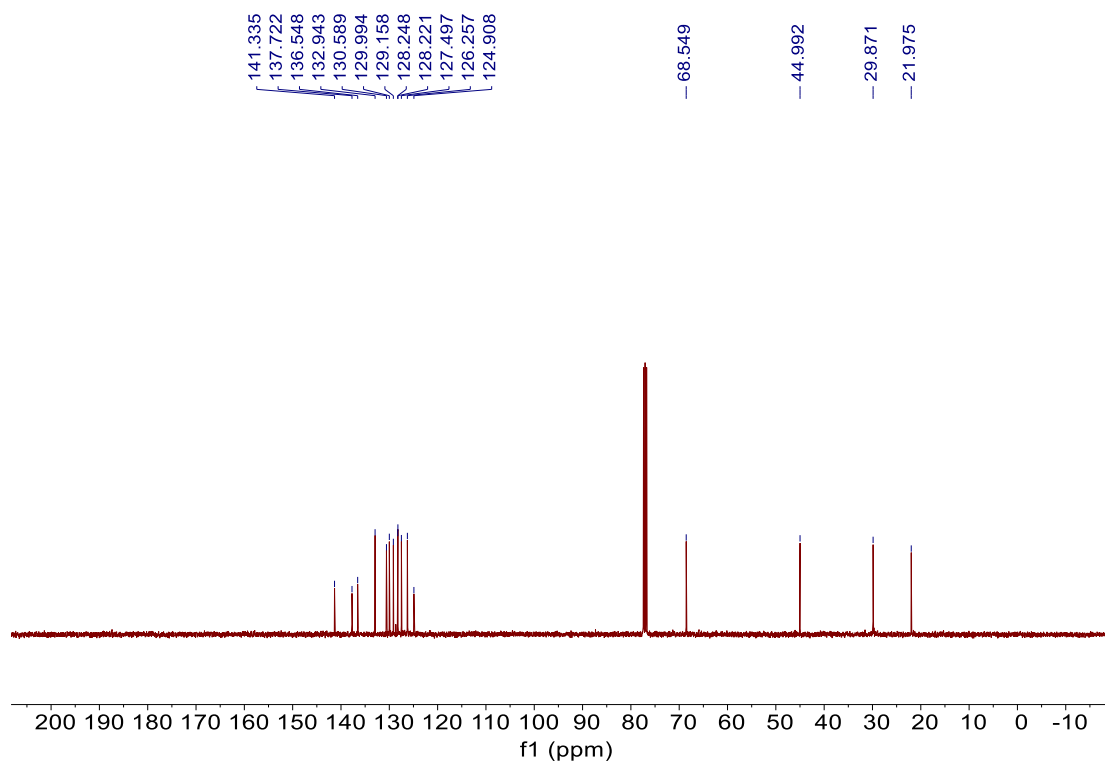

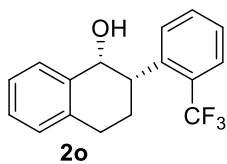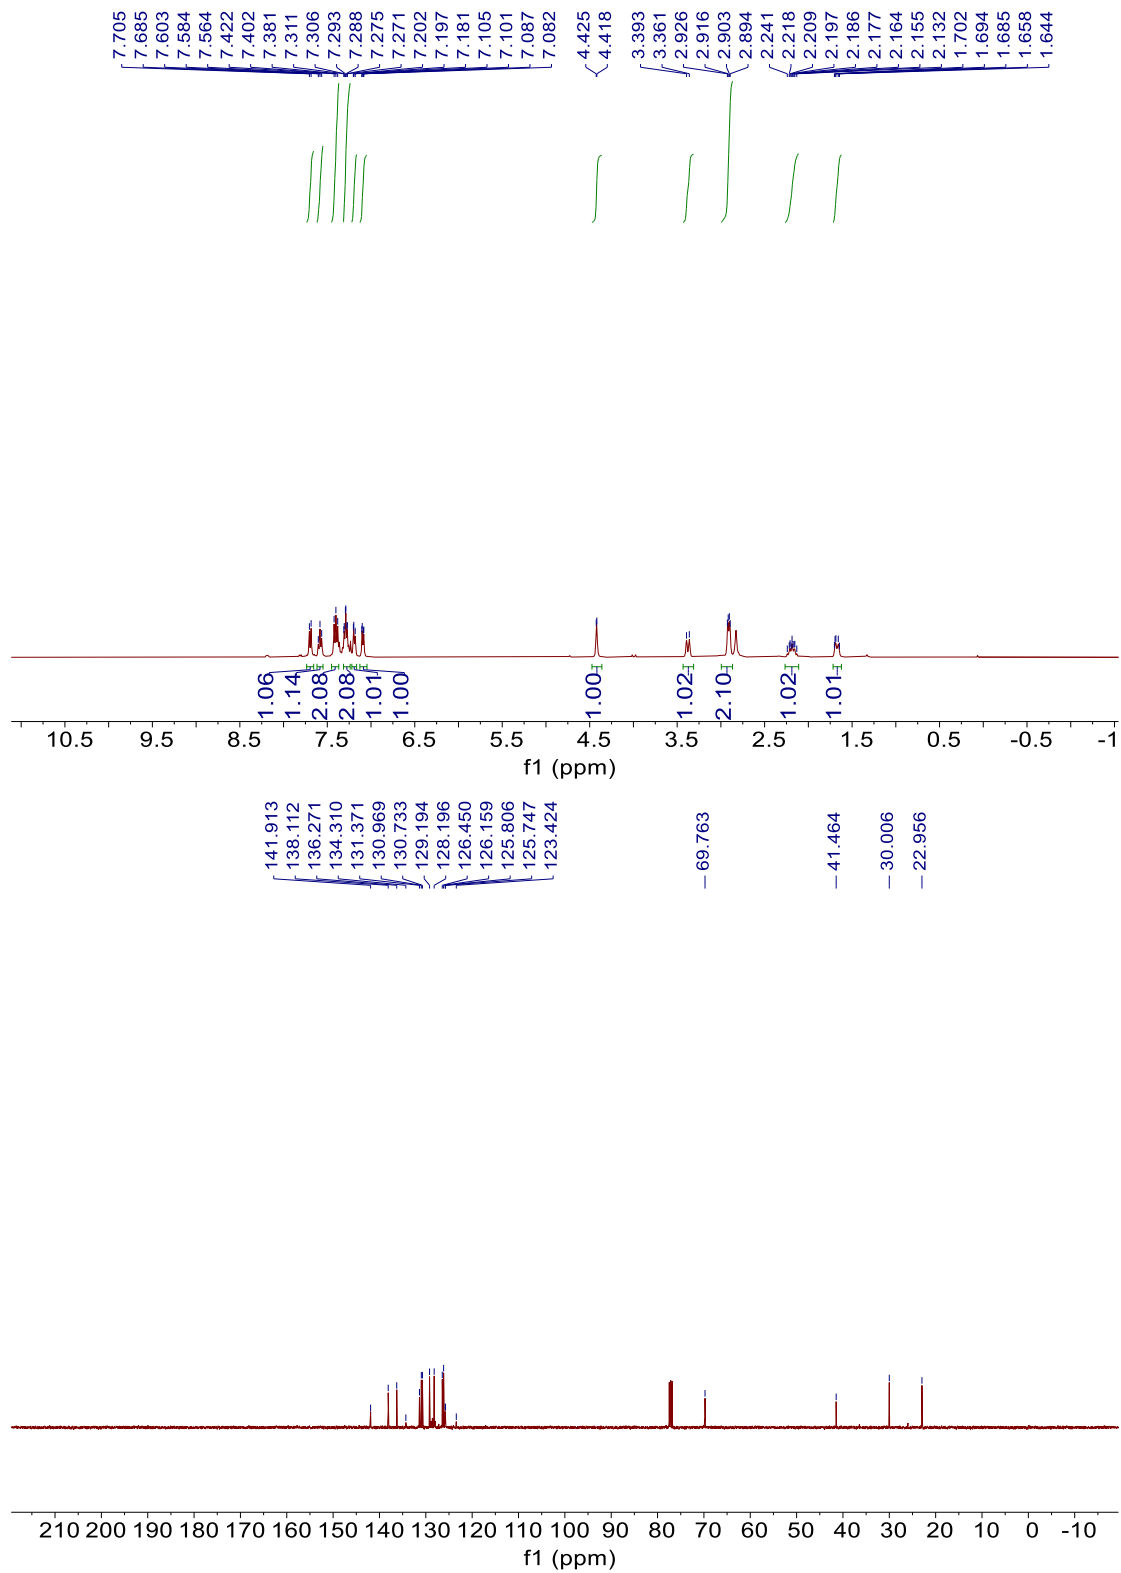



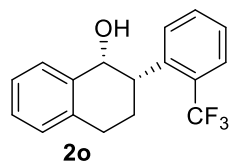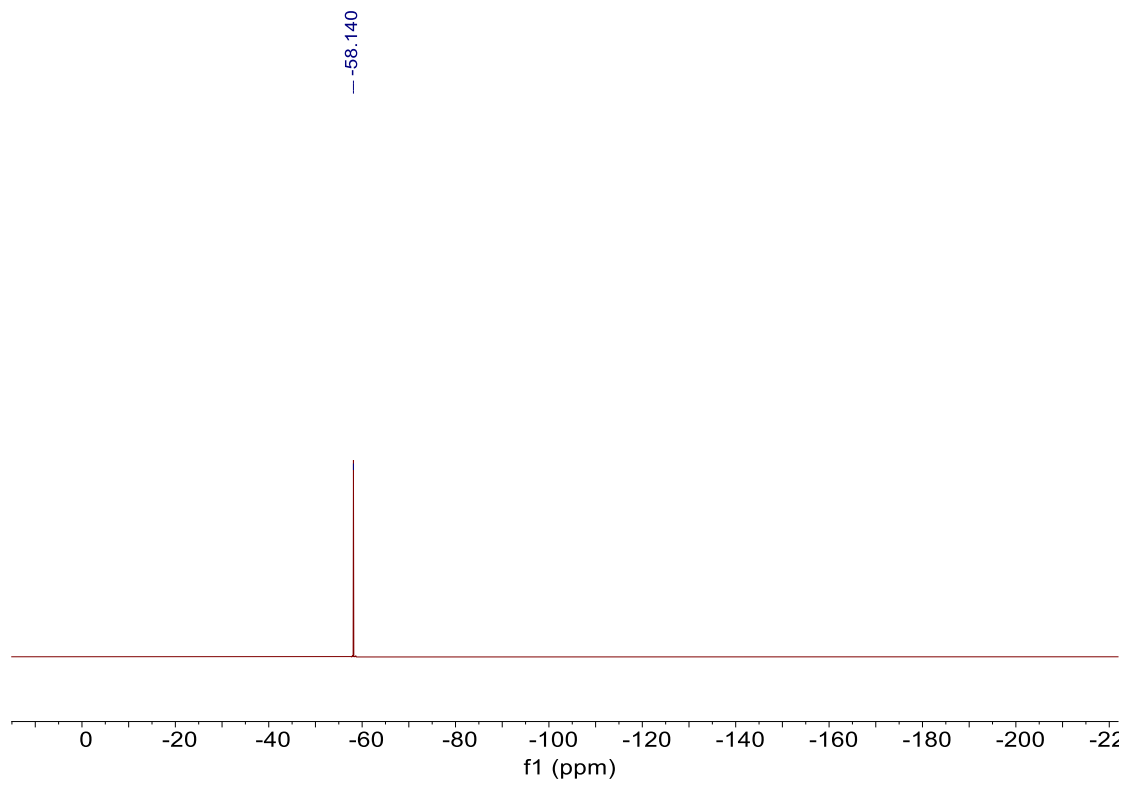

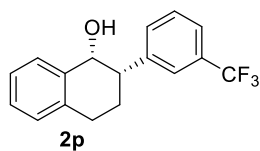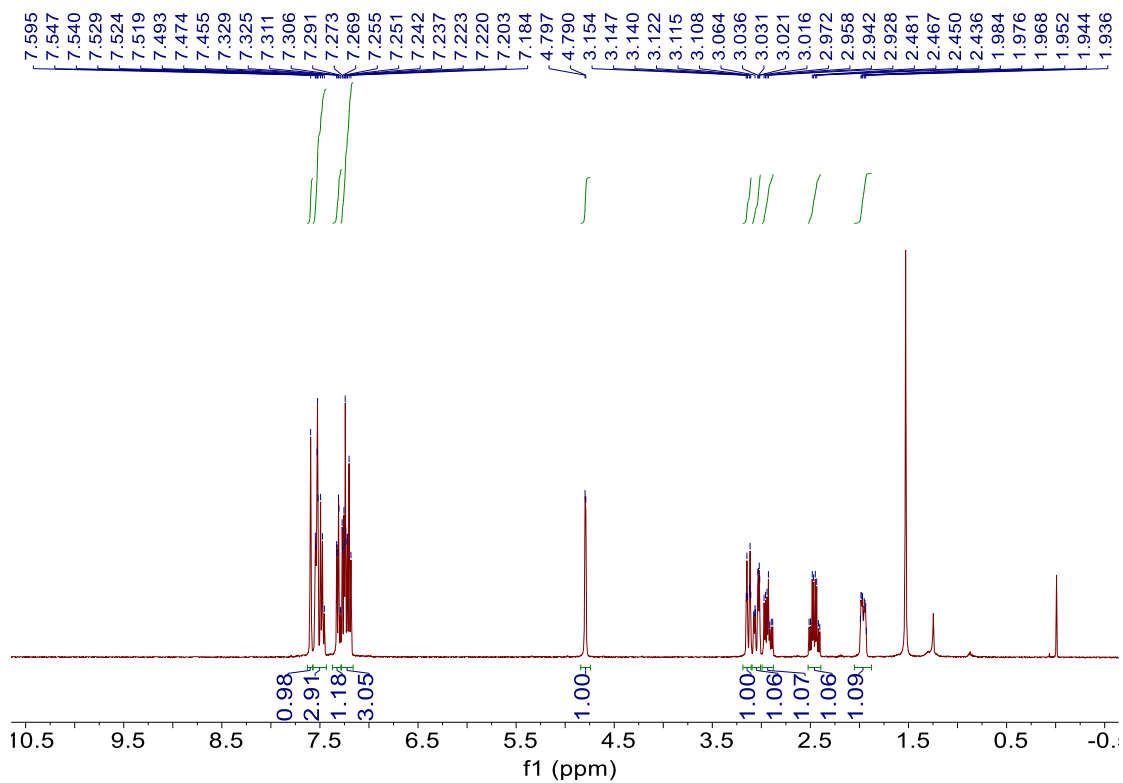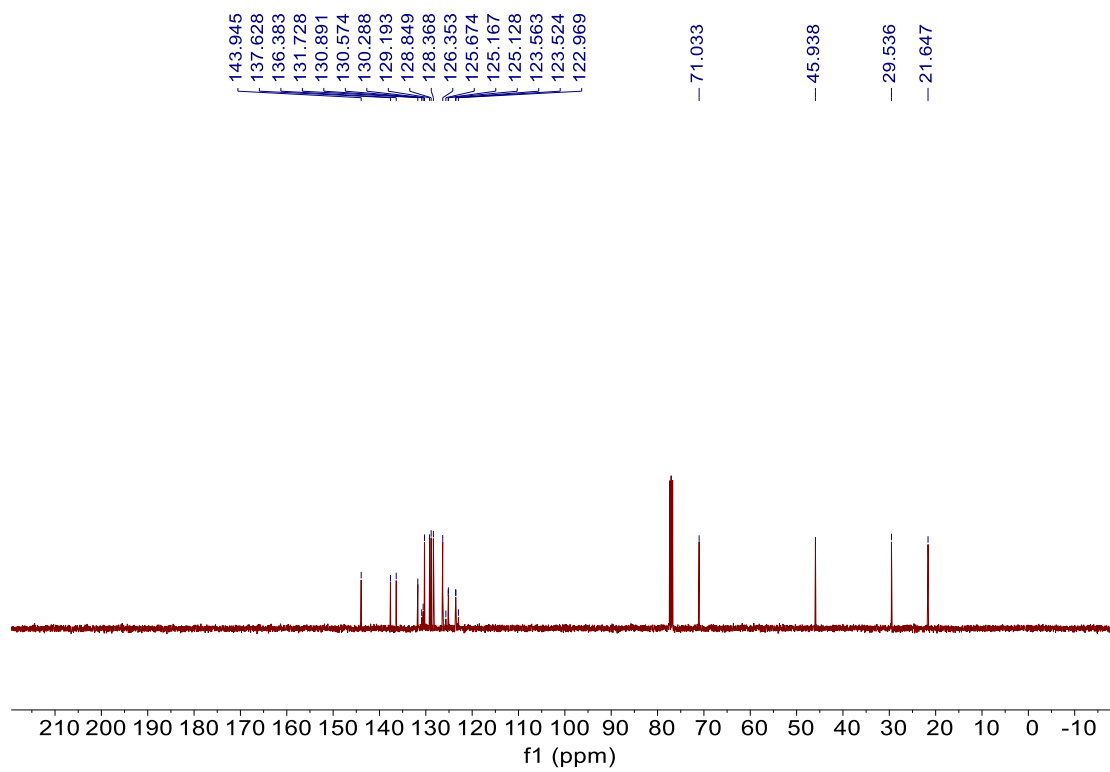

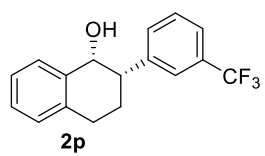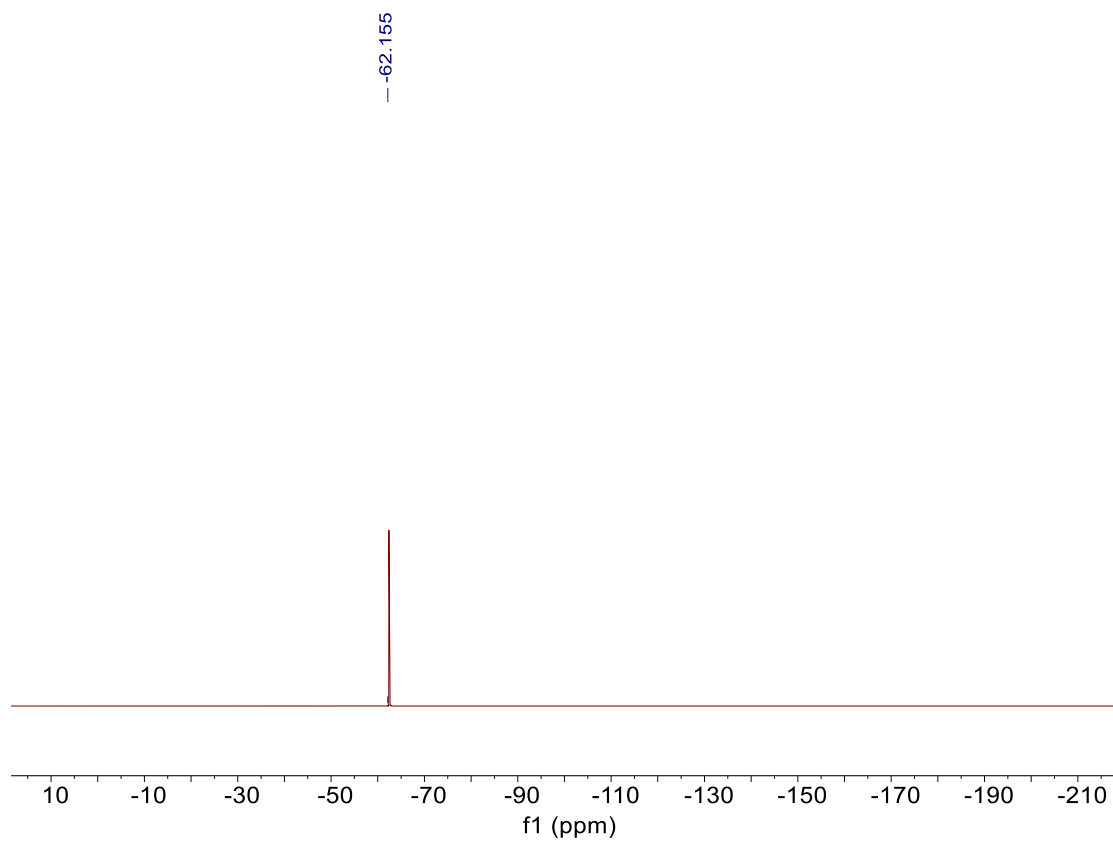

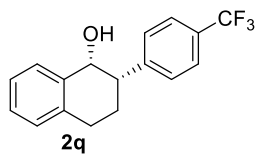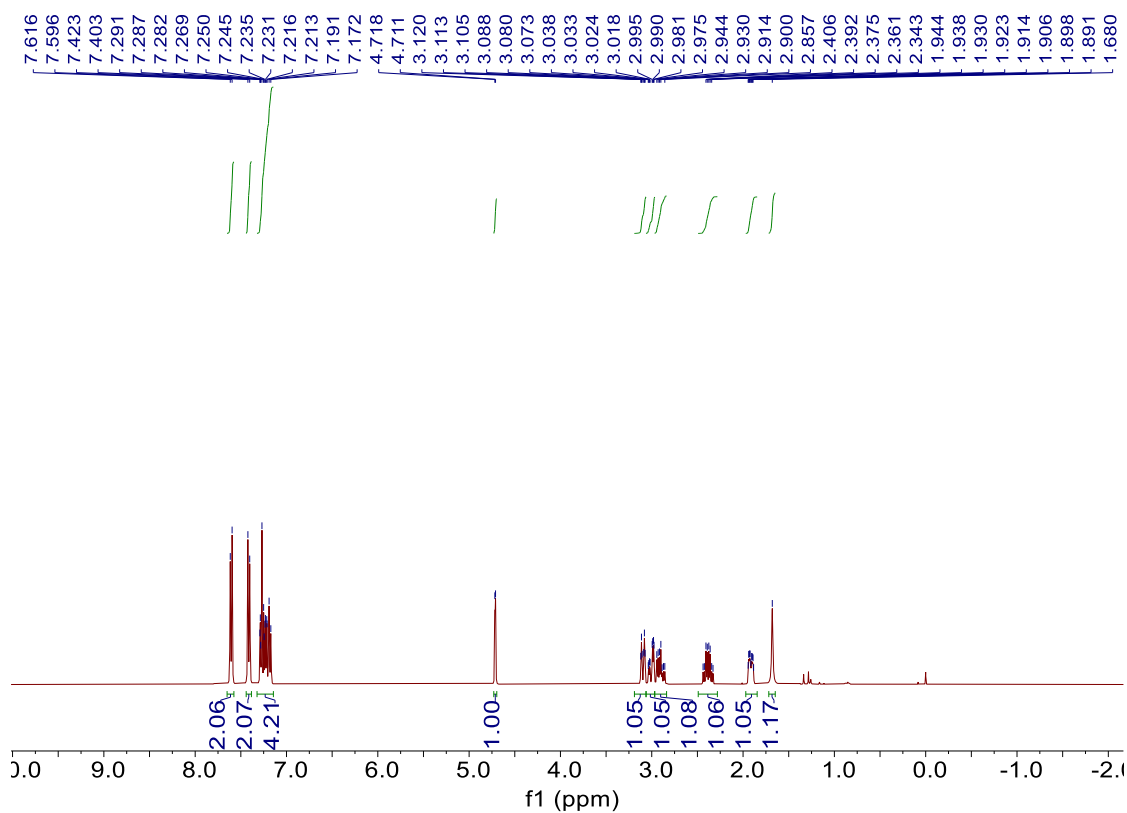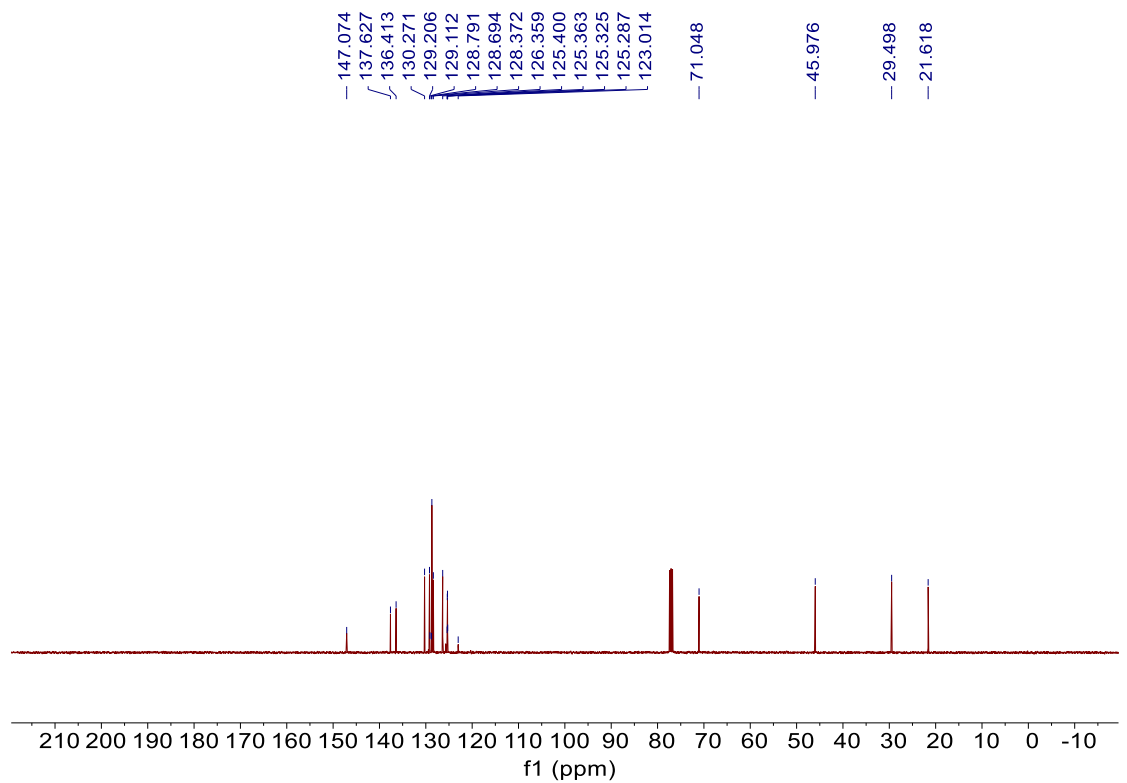

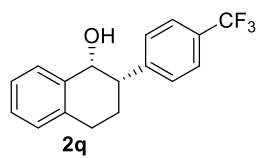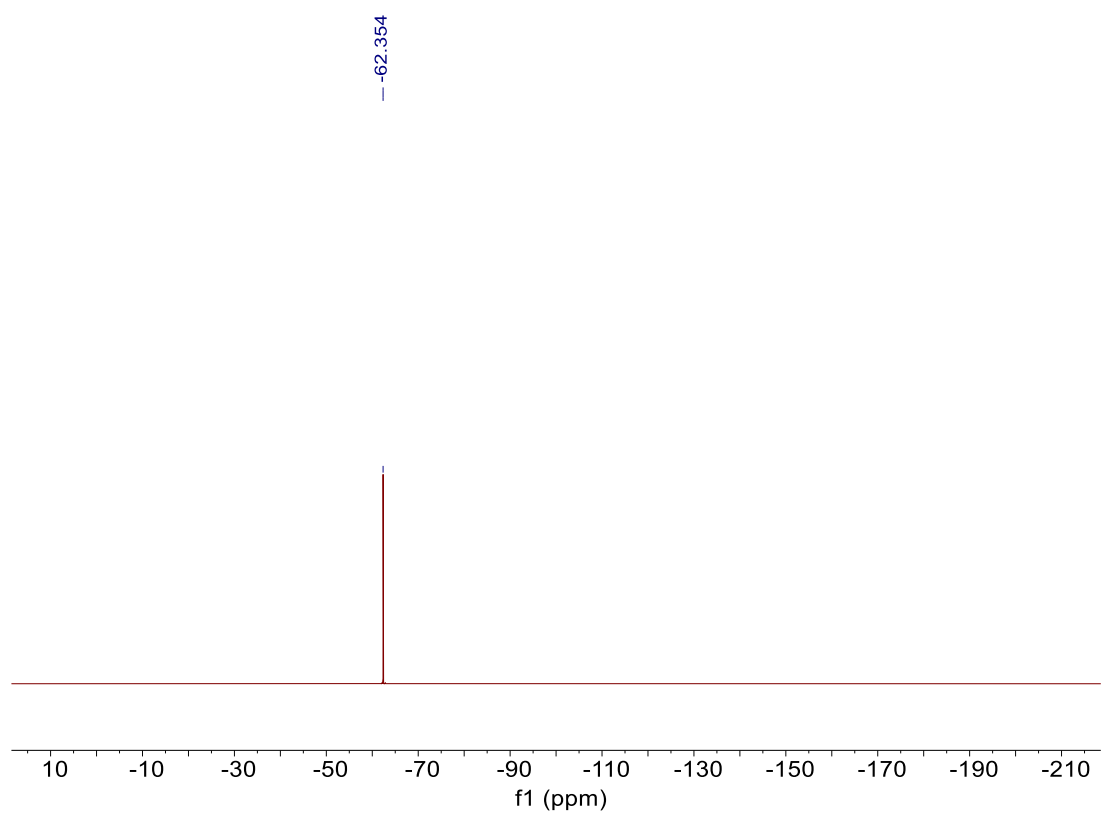

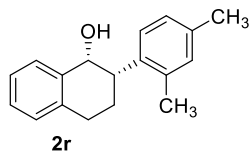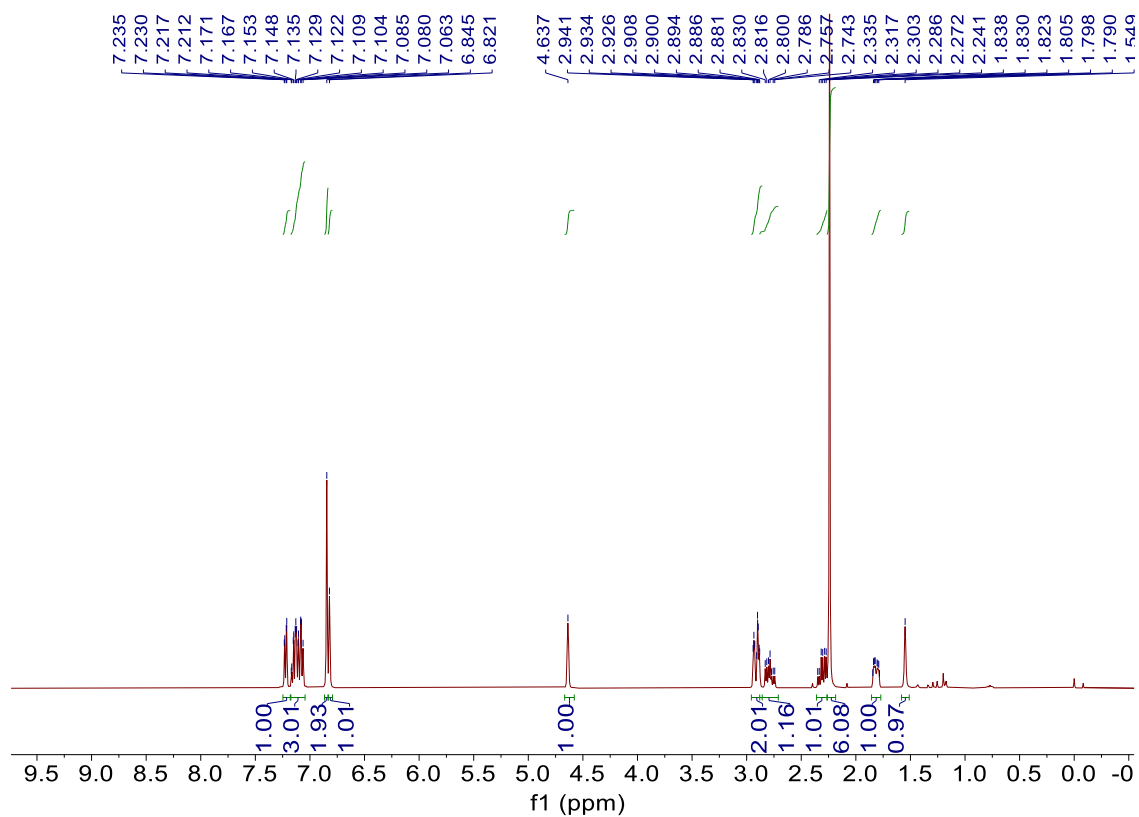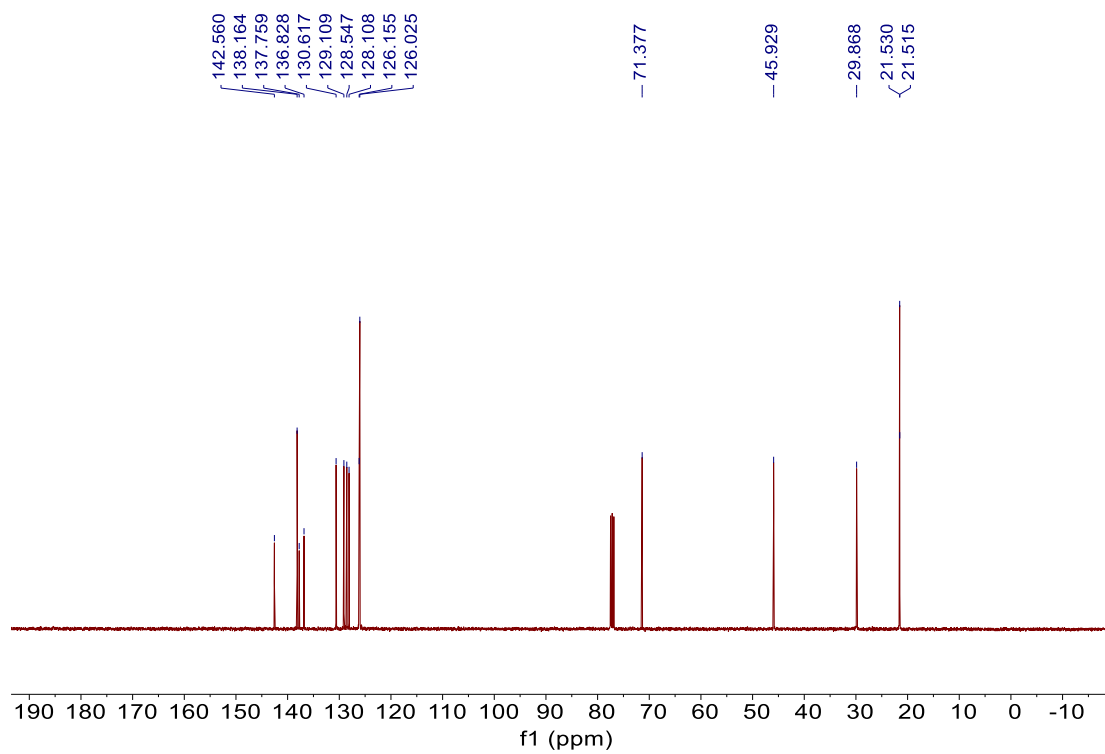

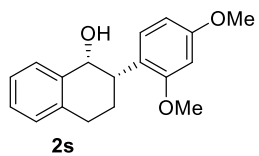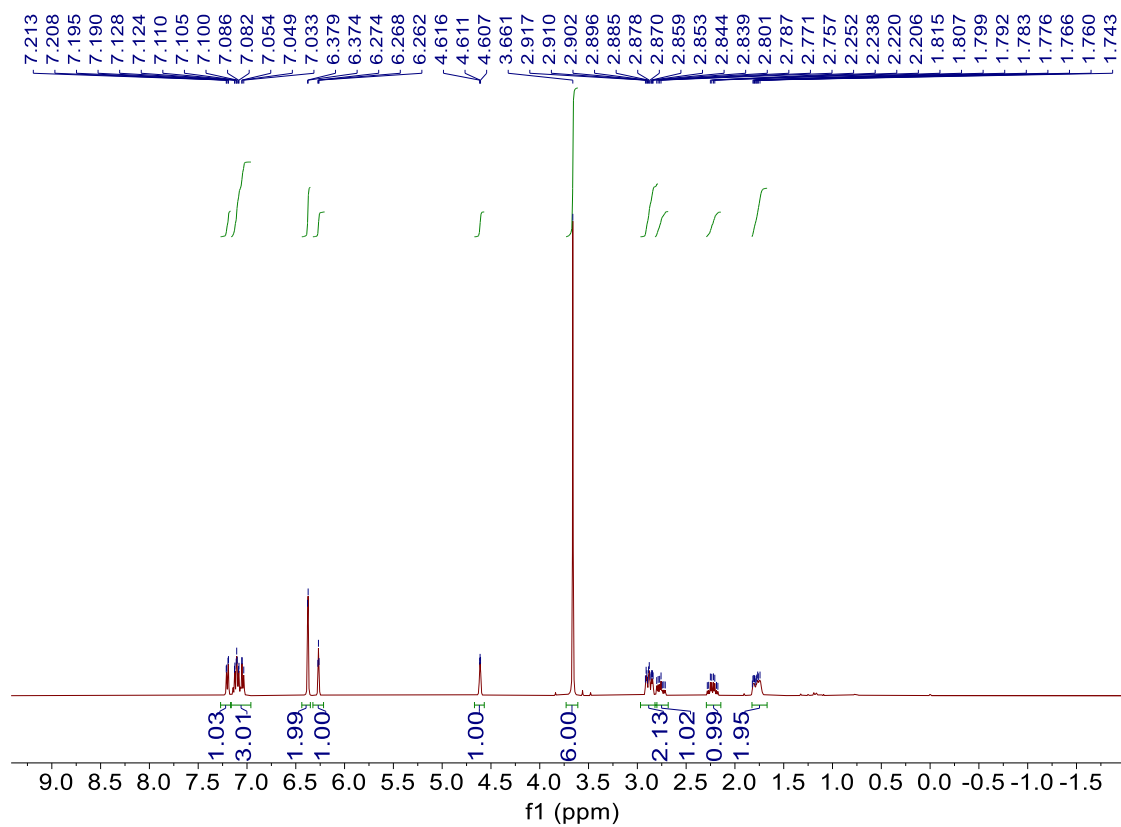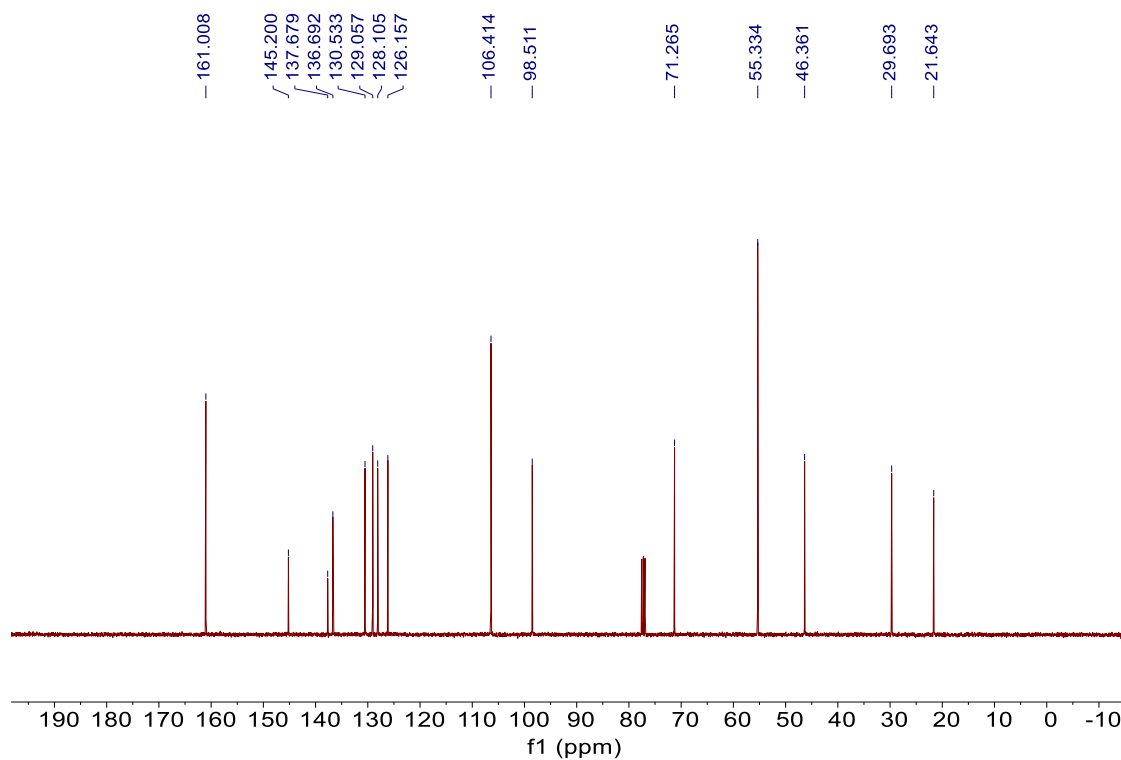

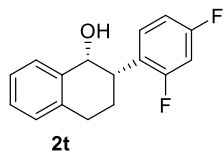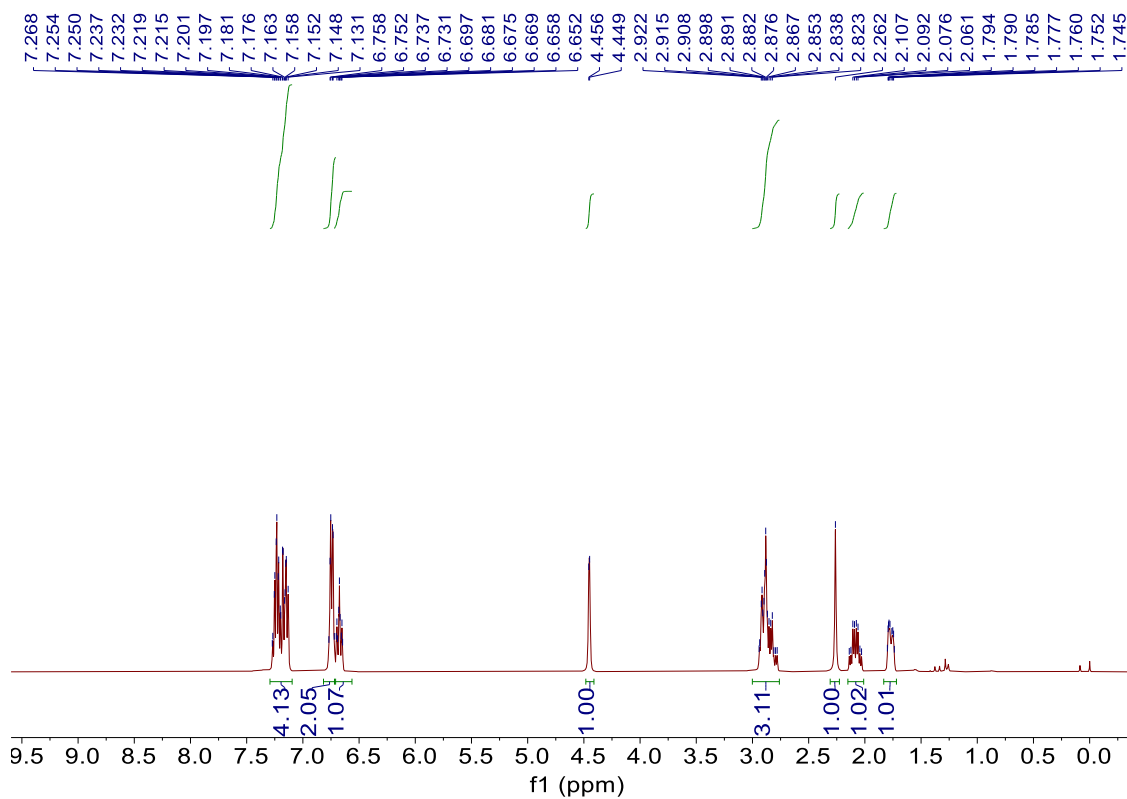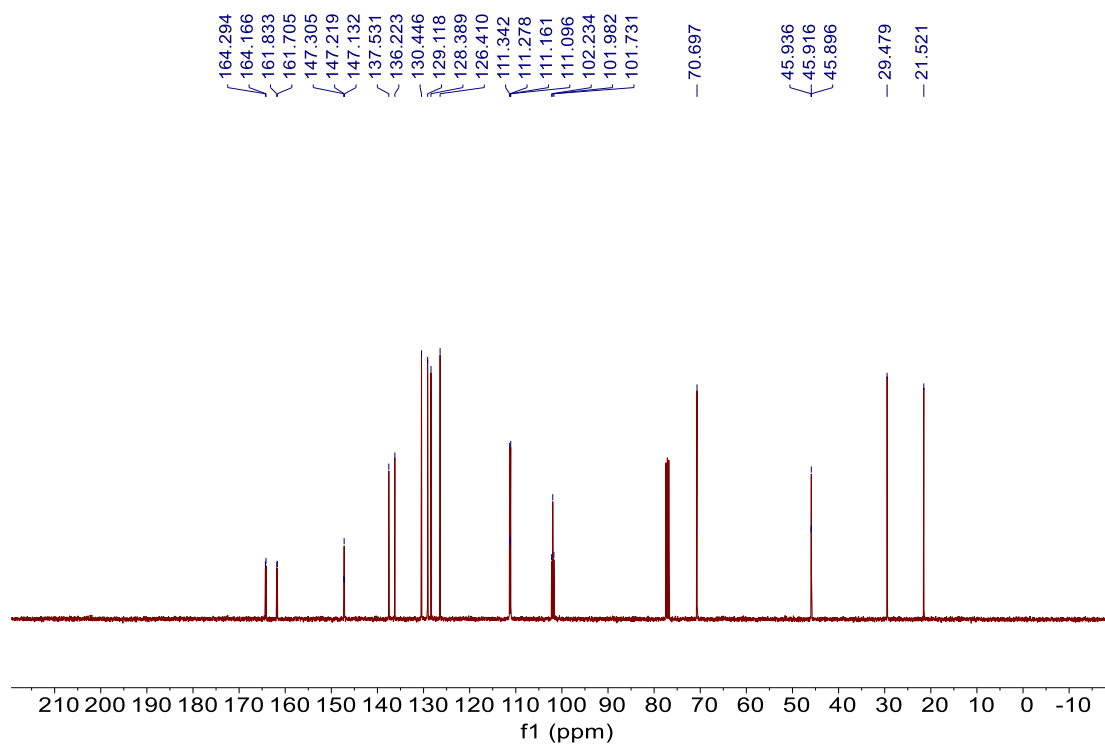



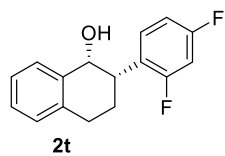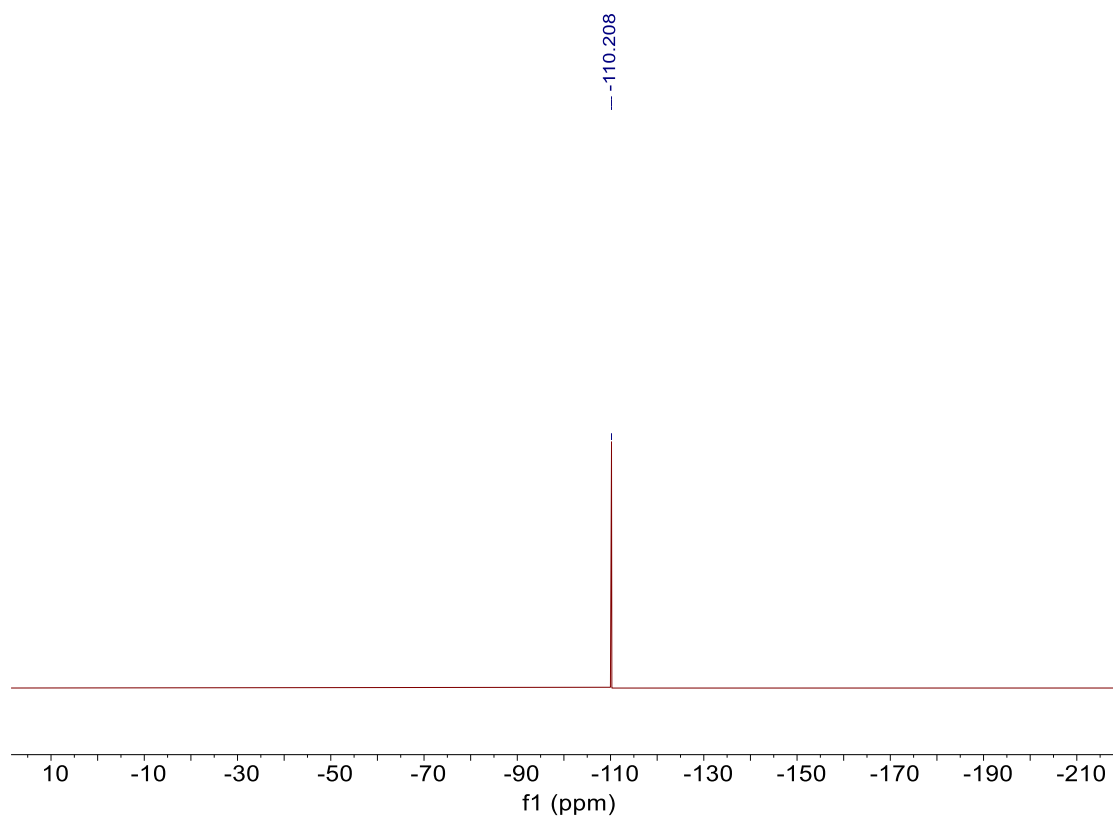

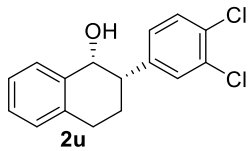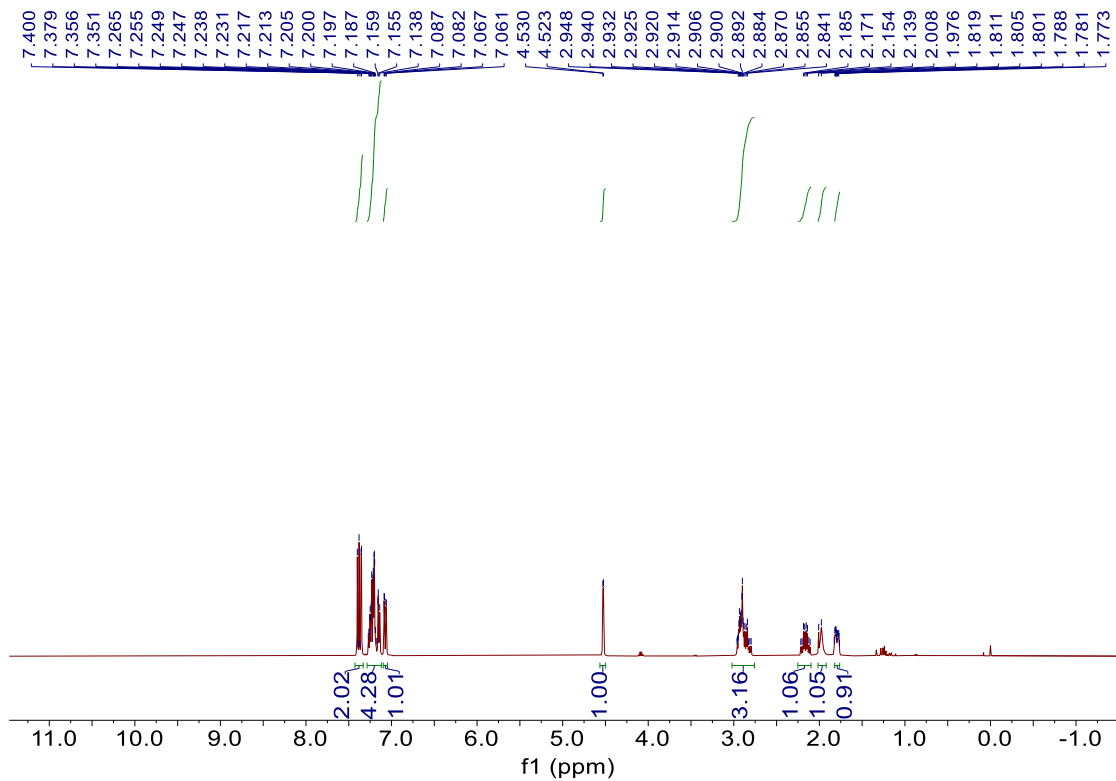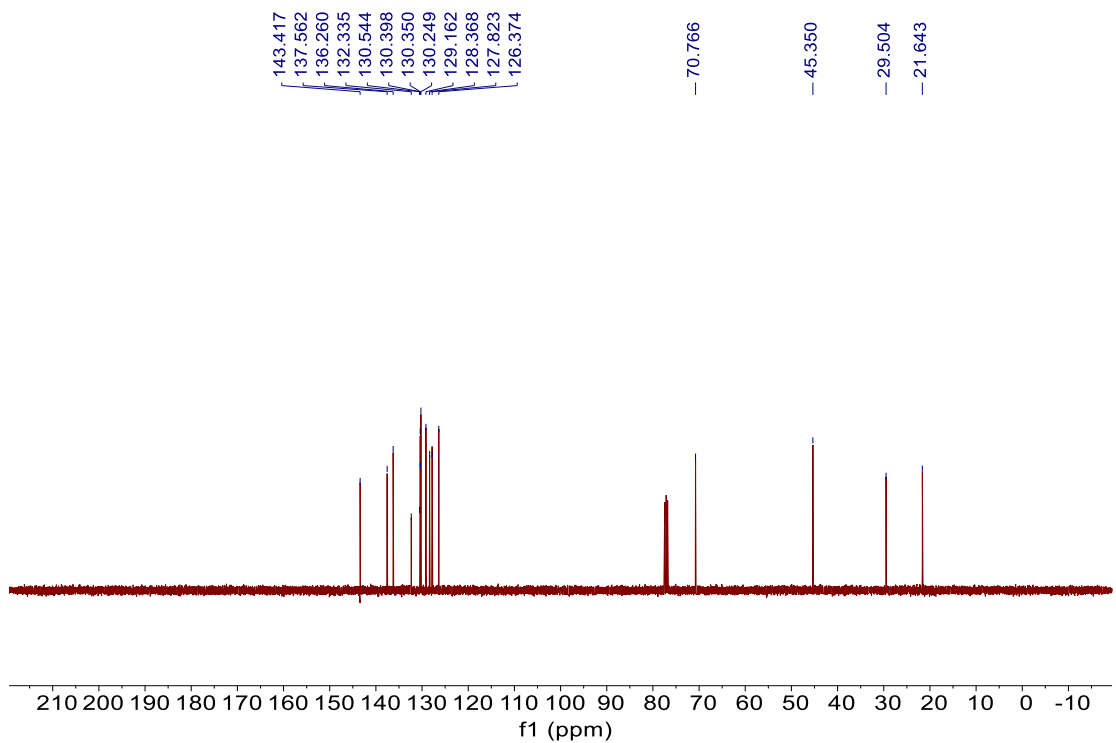

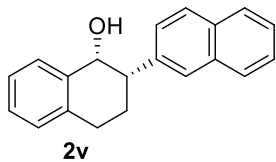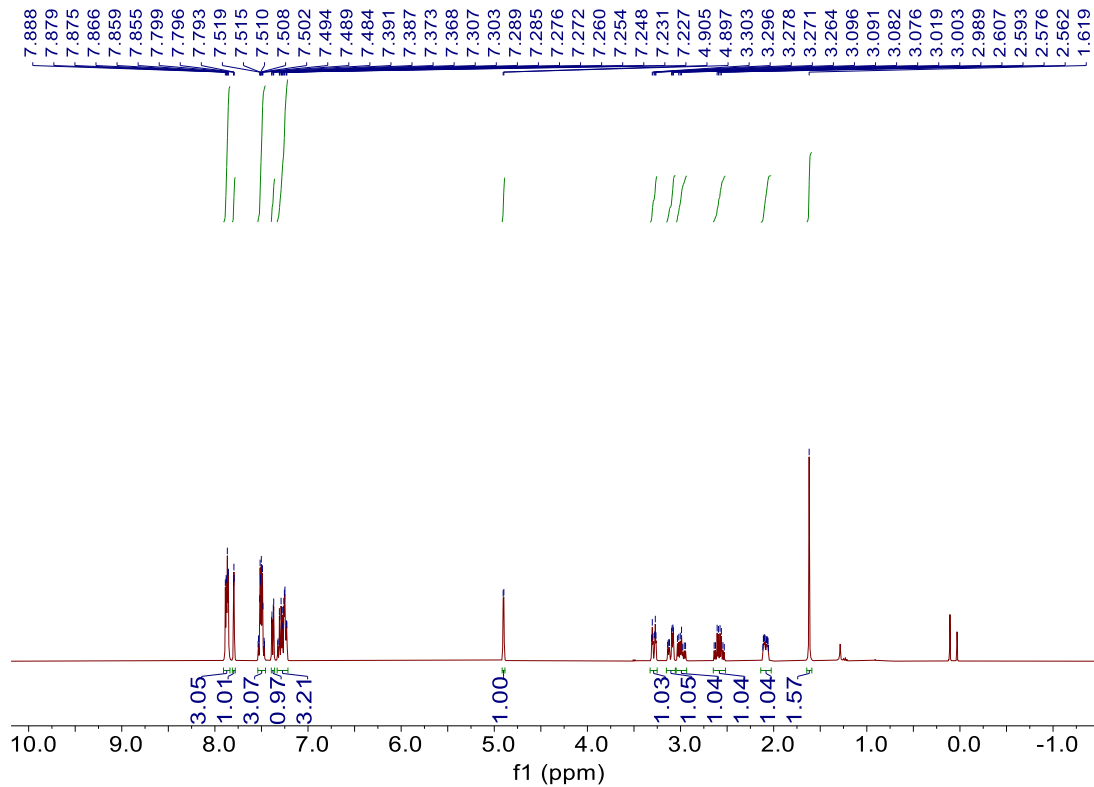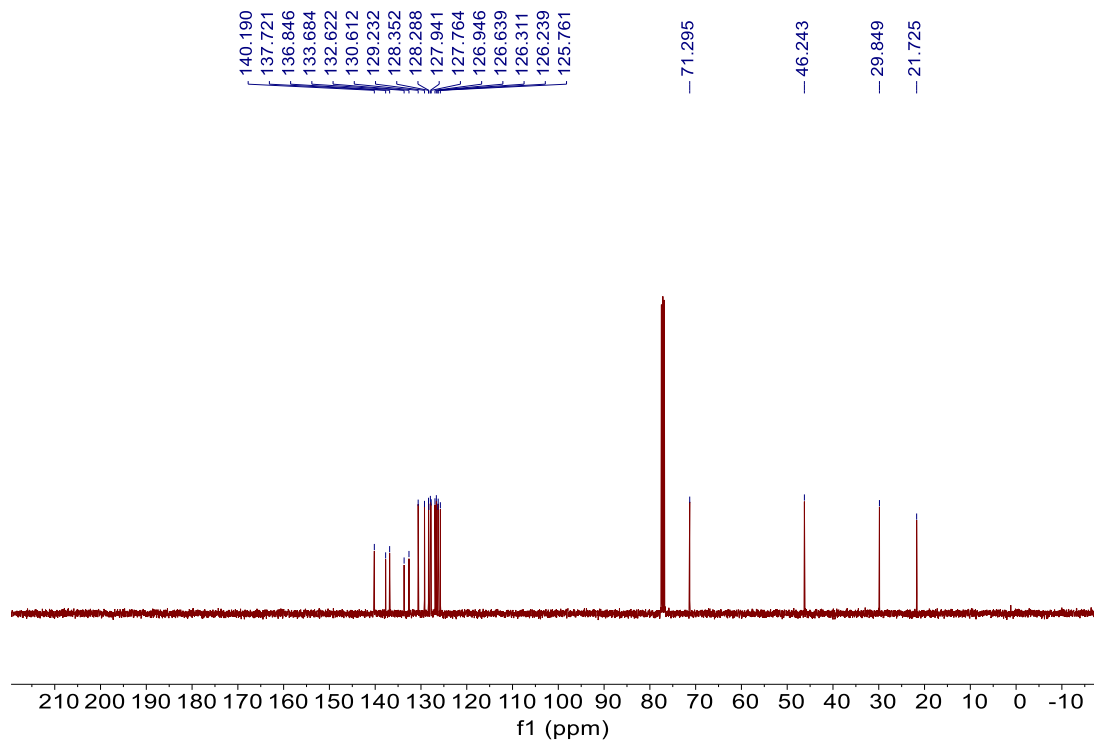

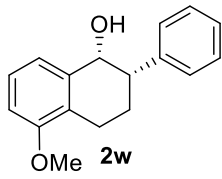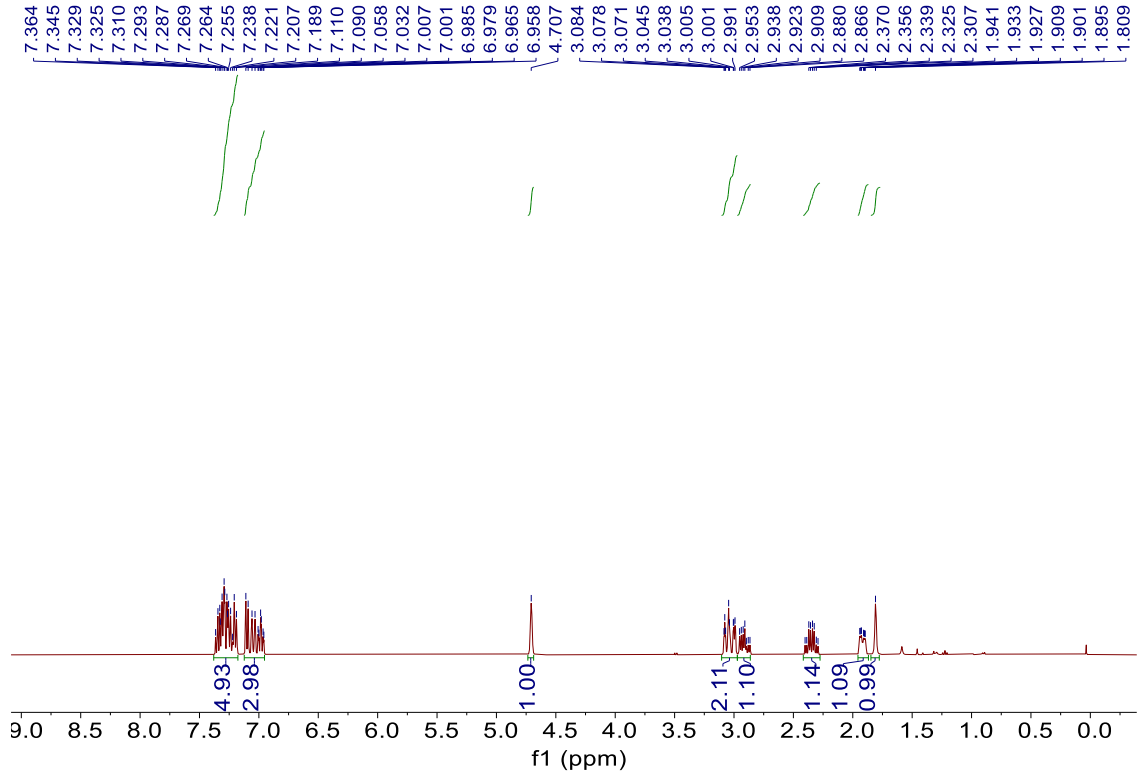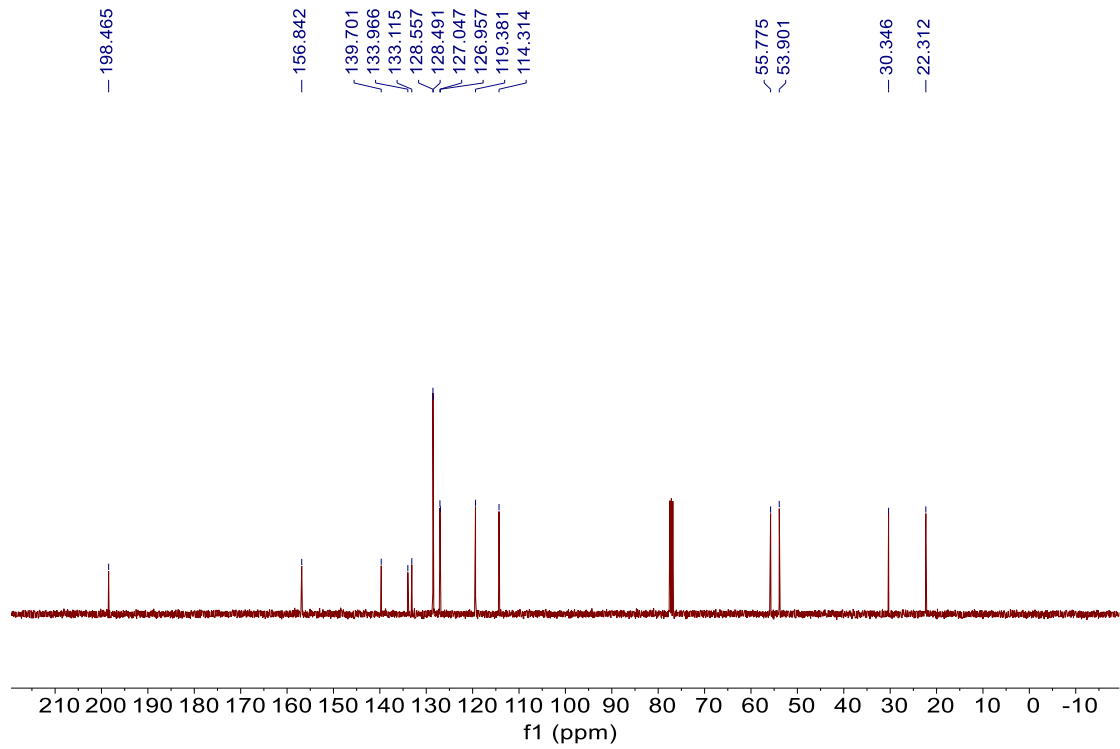

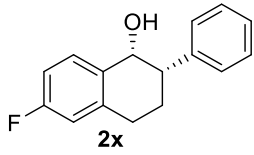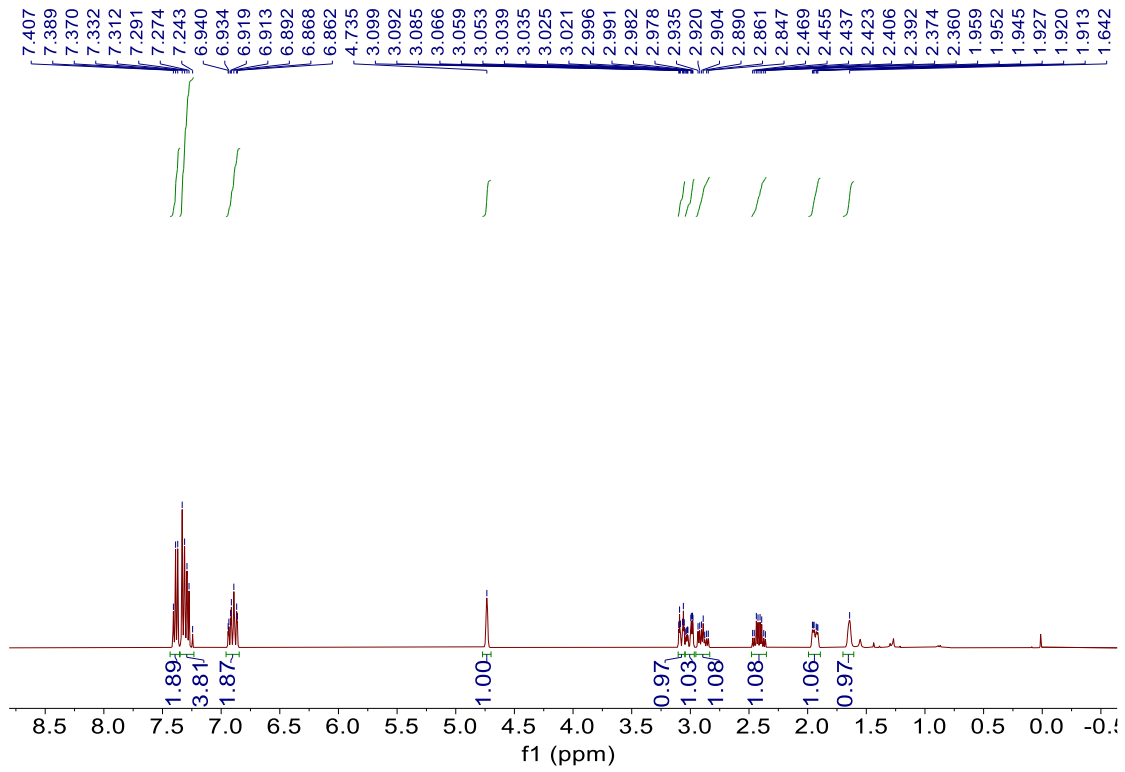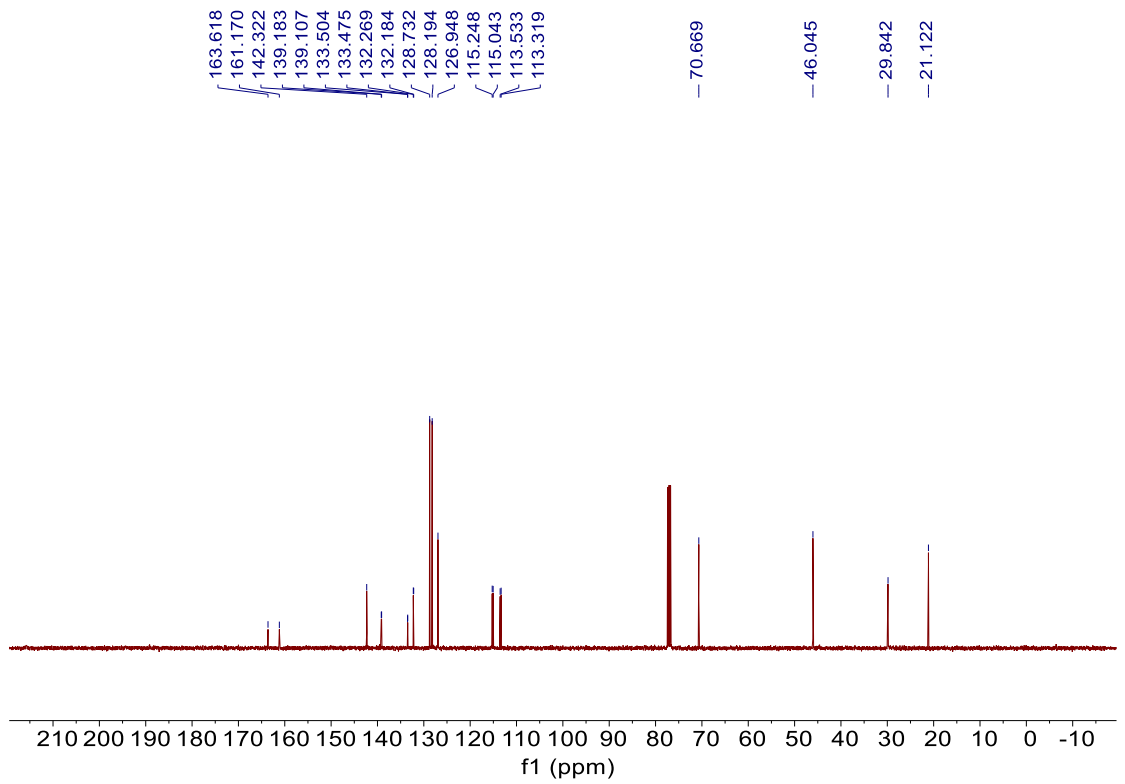

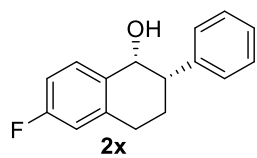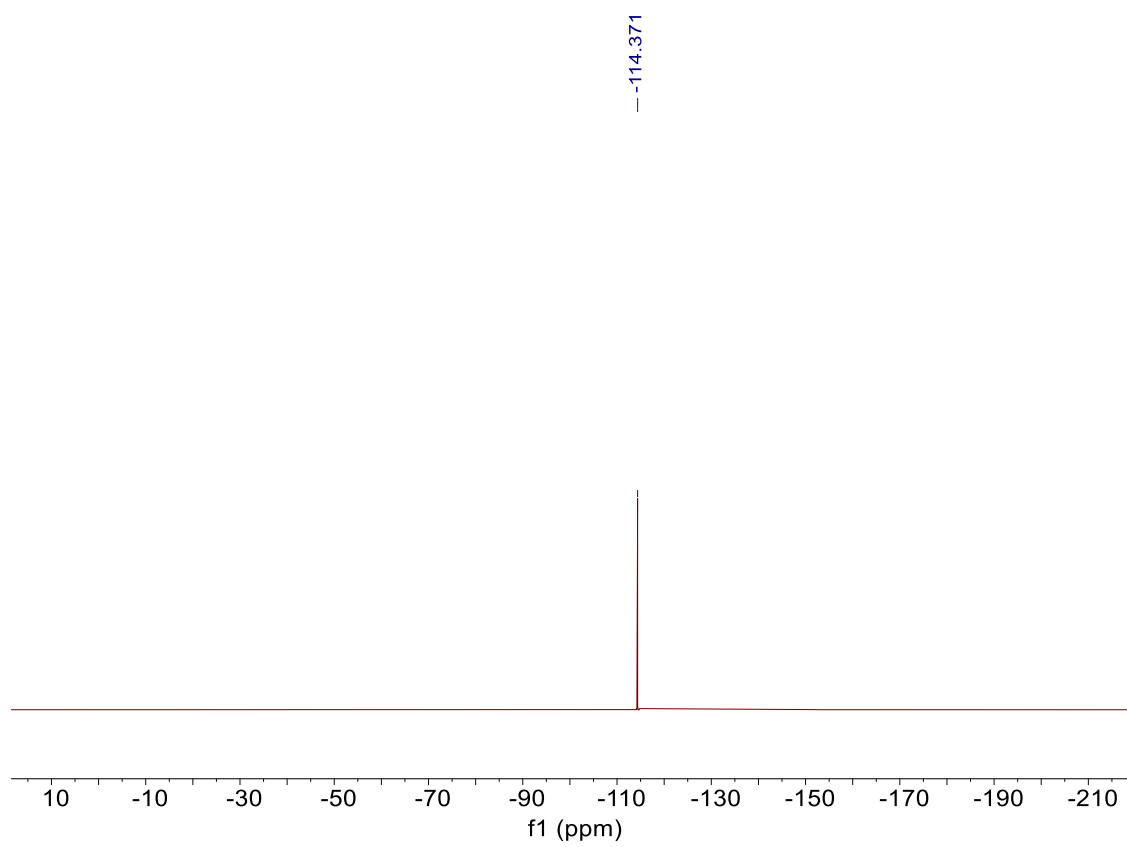

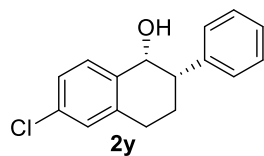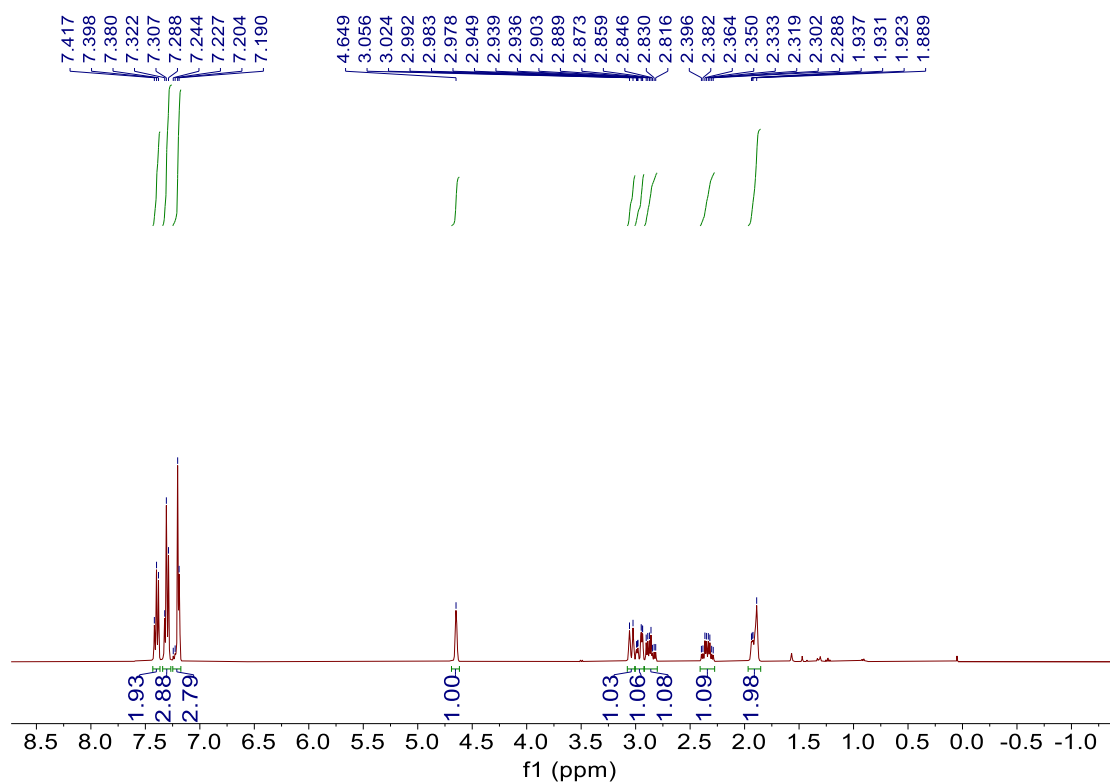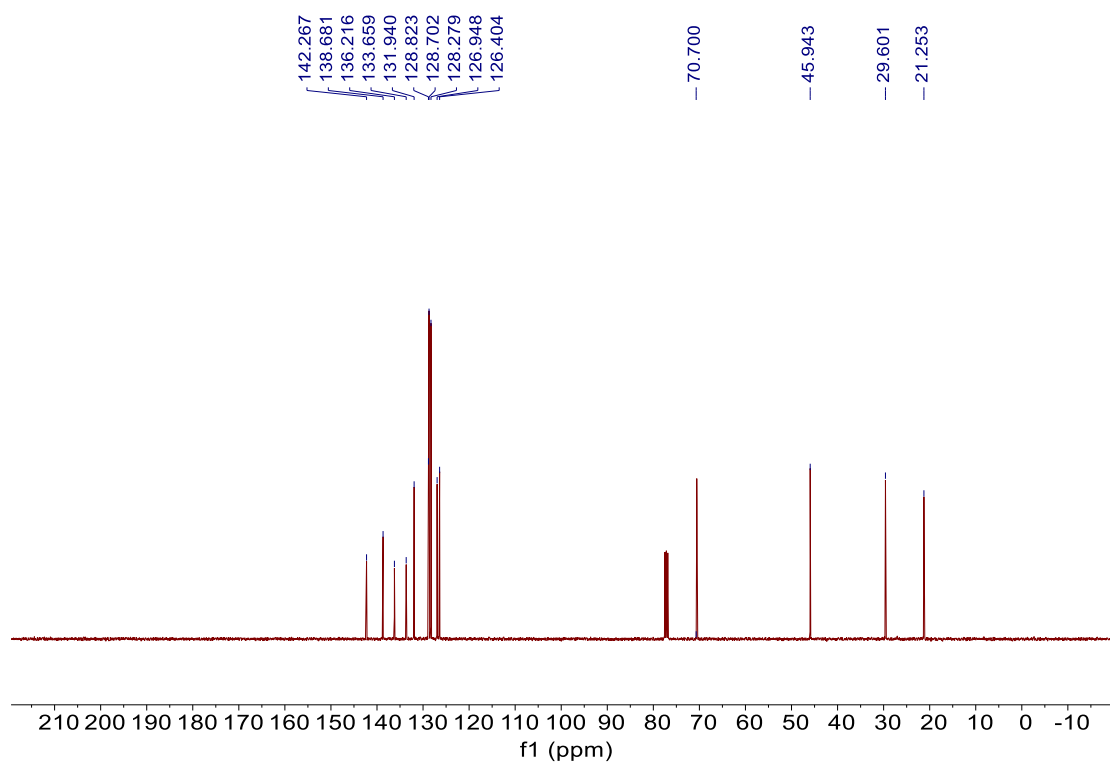

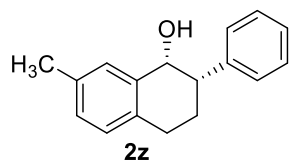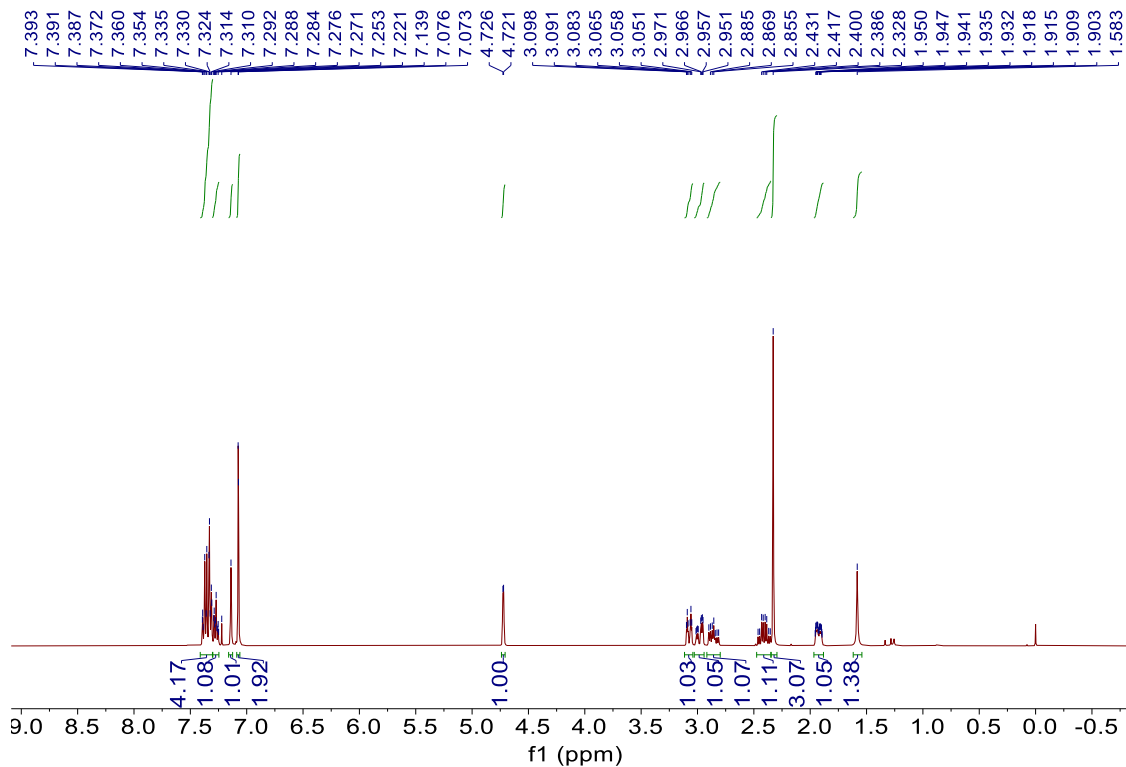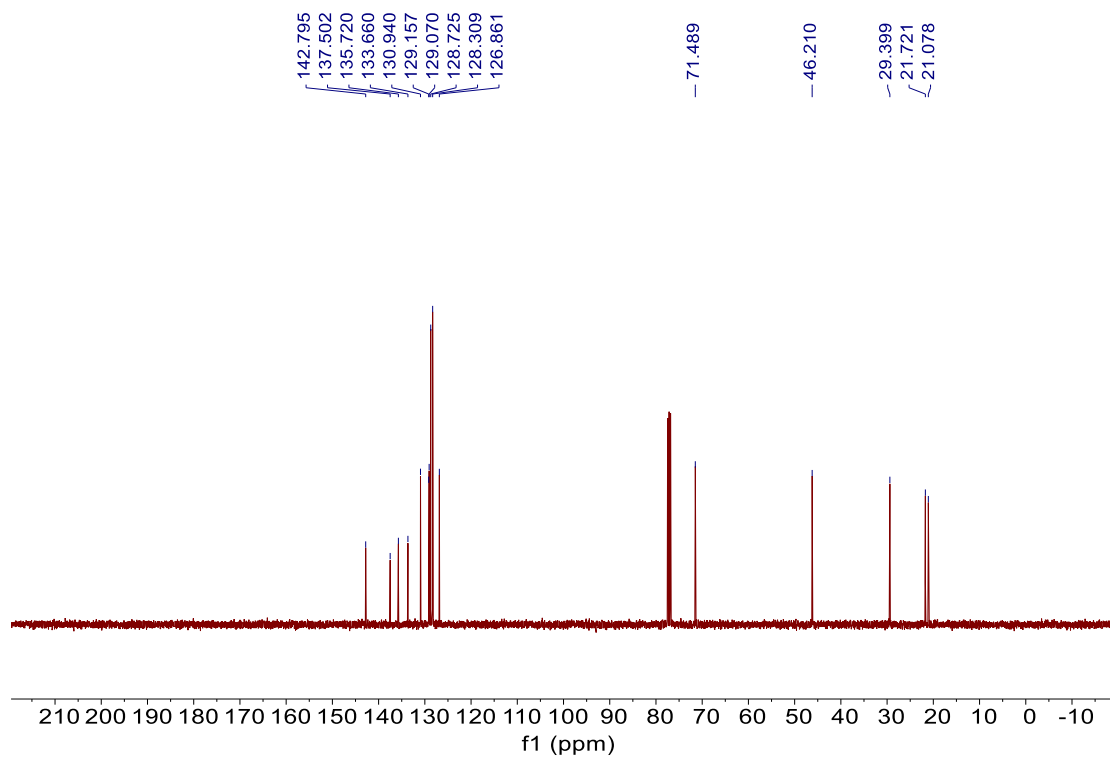



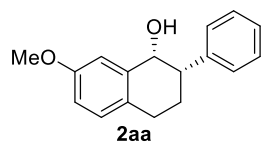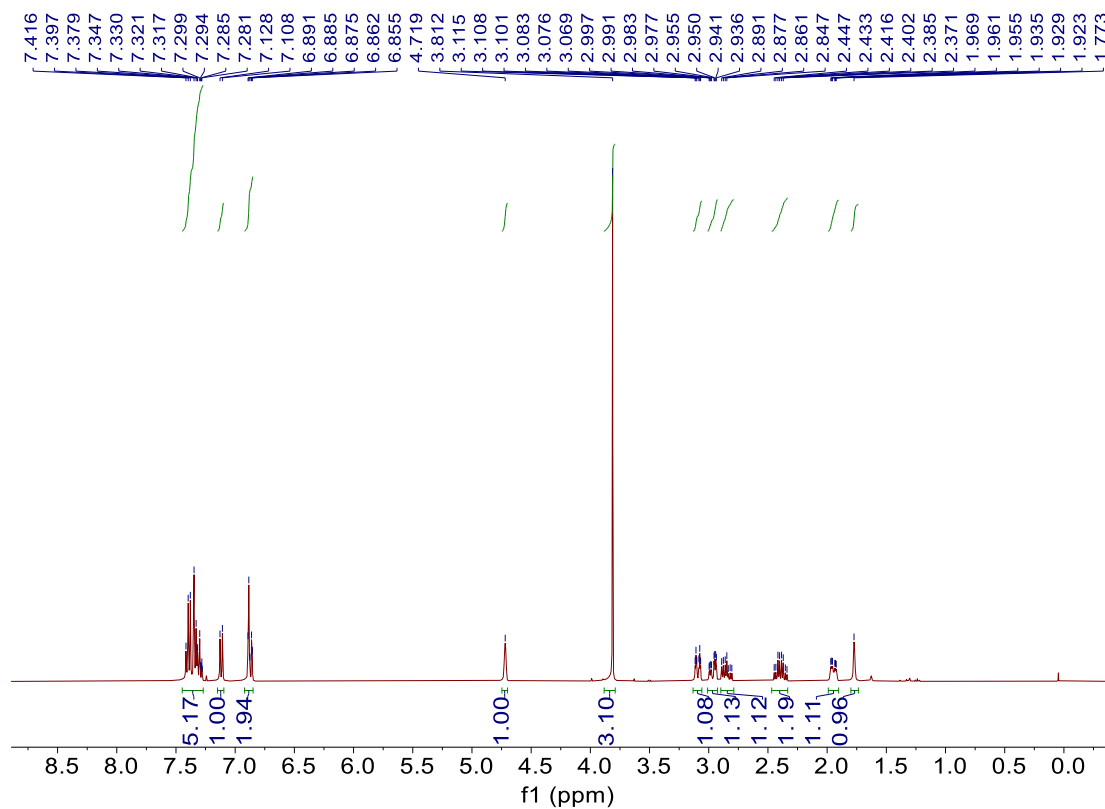

<sup>13</sup>C NMR spectrum (ppm):  
 157.968, 142.632, 138.684, 130.097, 128.800, 128.703, 128.322, 126.866, 115.042, 114.522, 71.579, 55.433, 46.115, 28.916, 21.954.

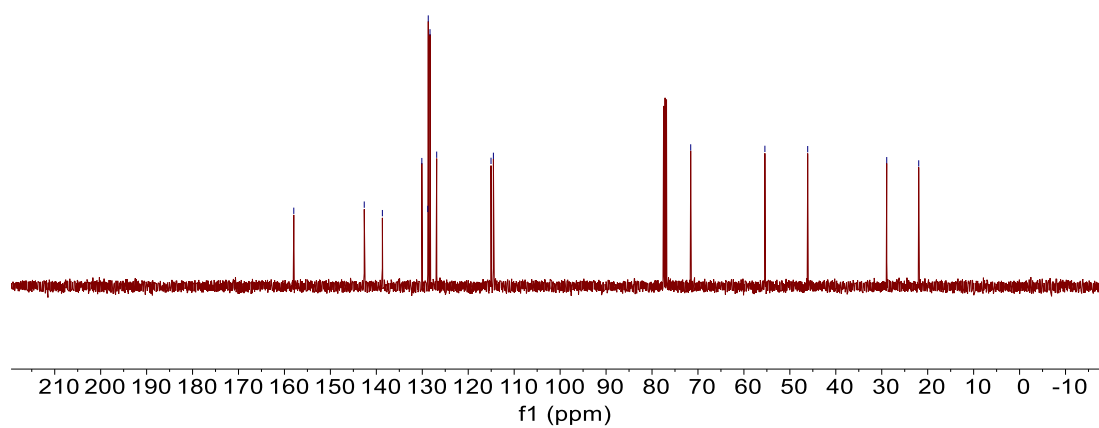

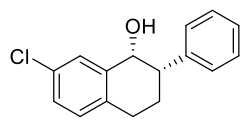

**2ab**

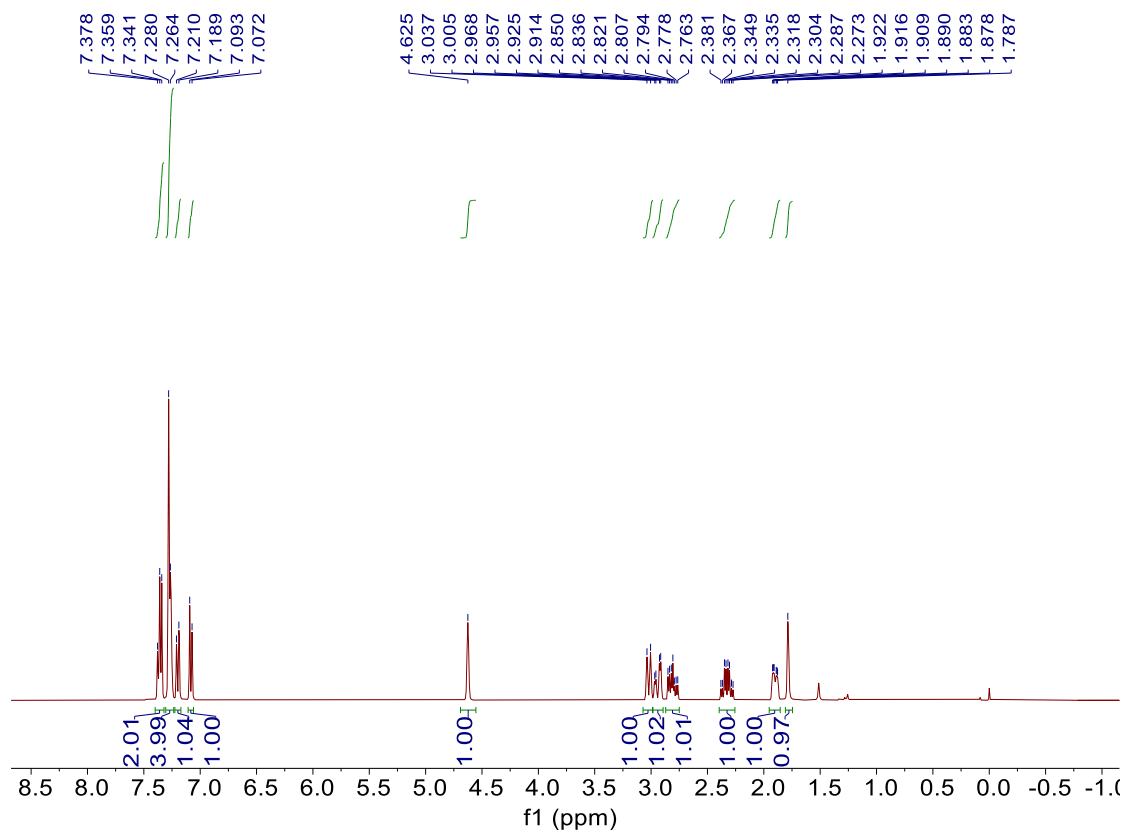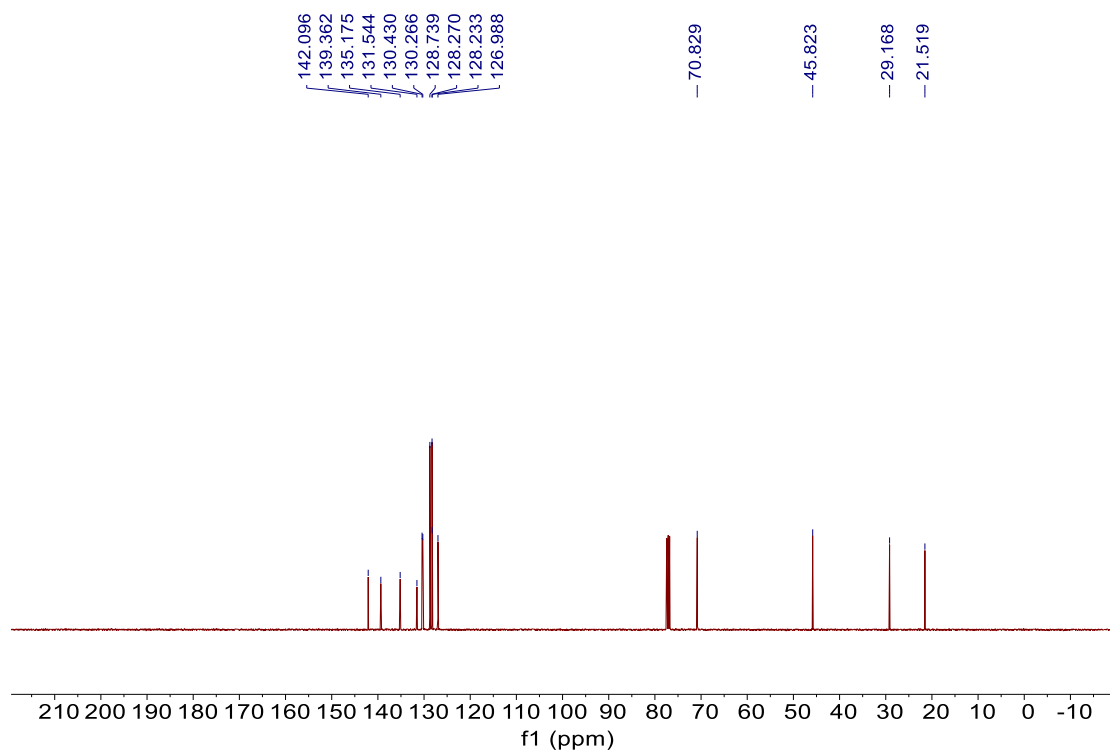

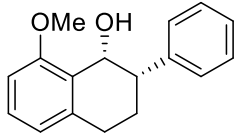

**2ac**

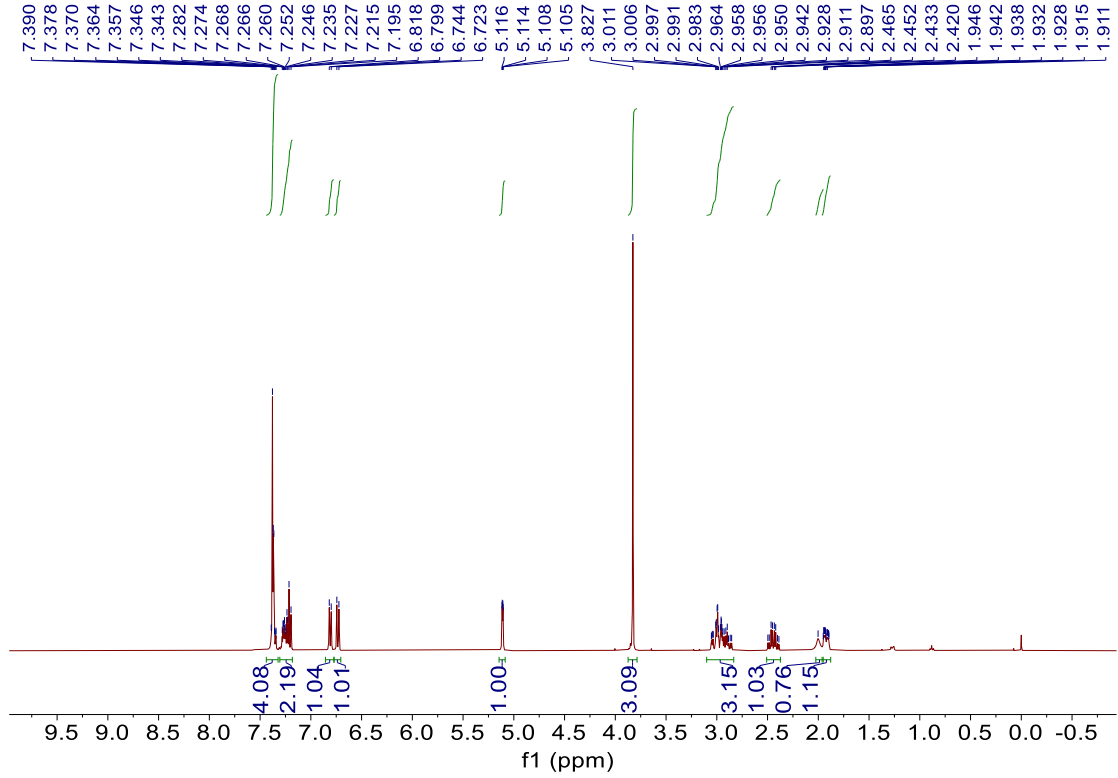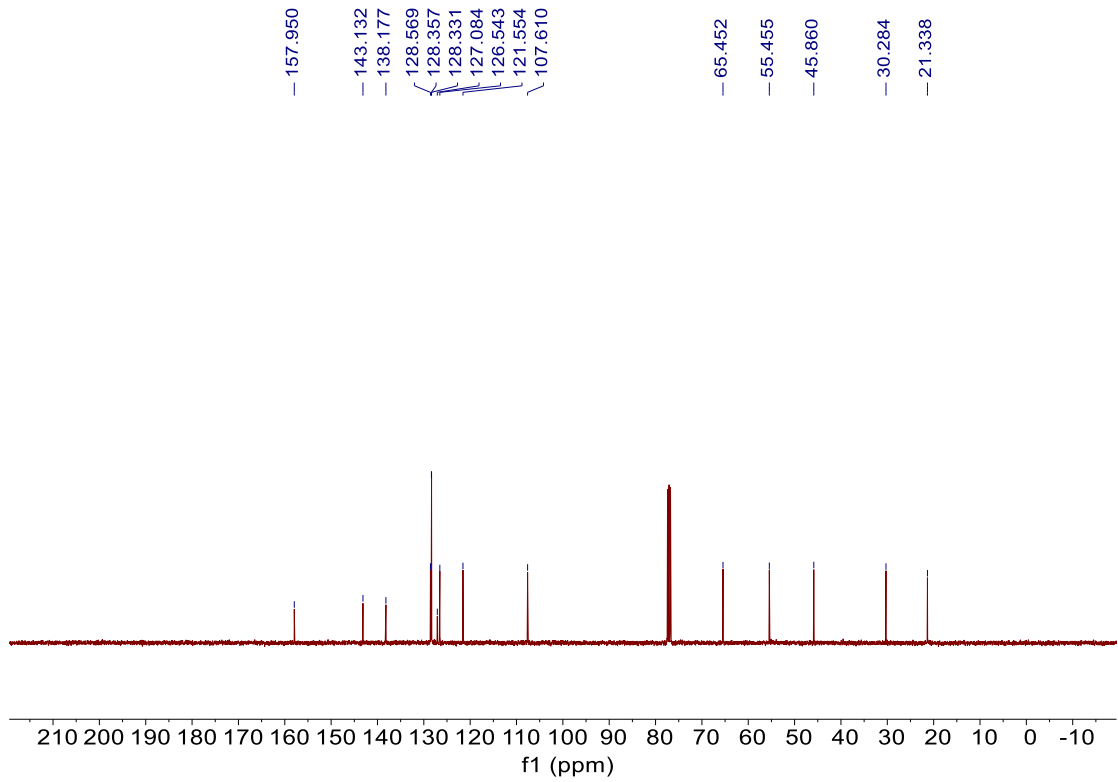

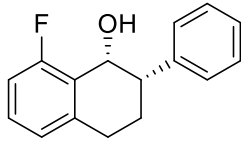

**2ad**

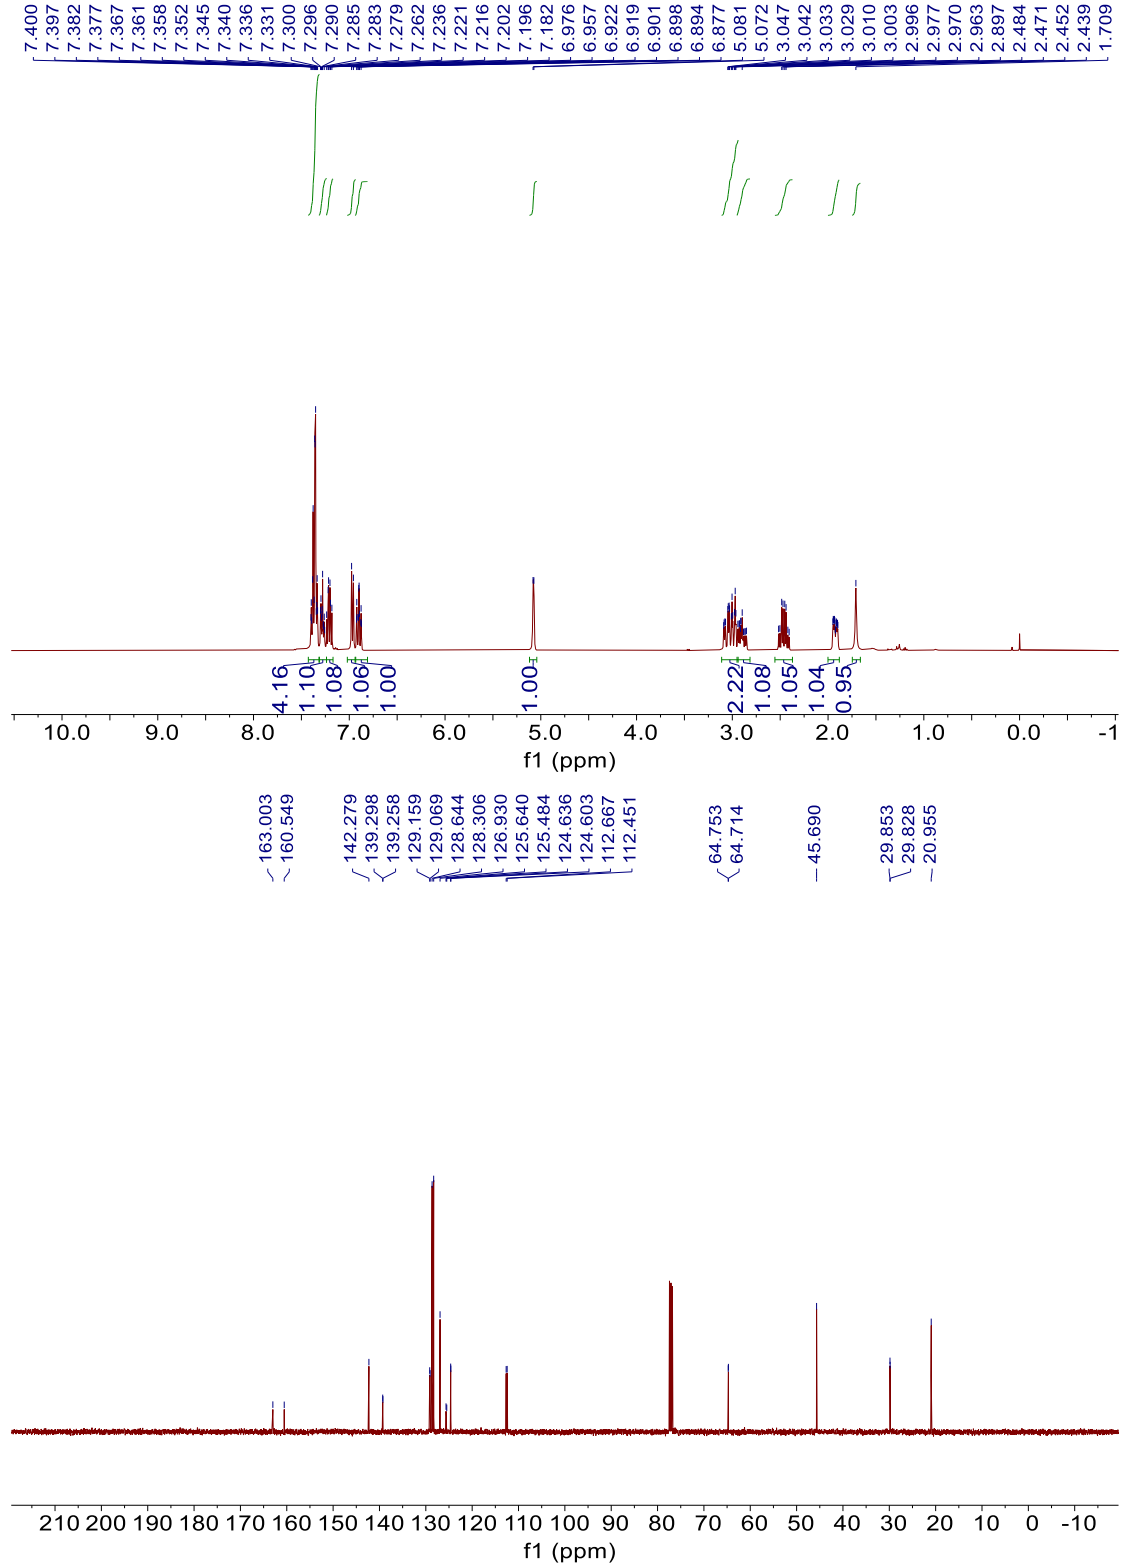

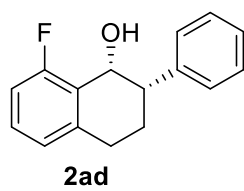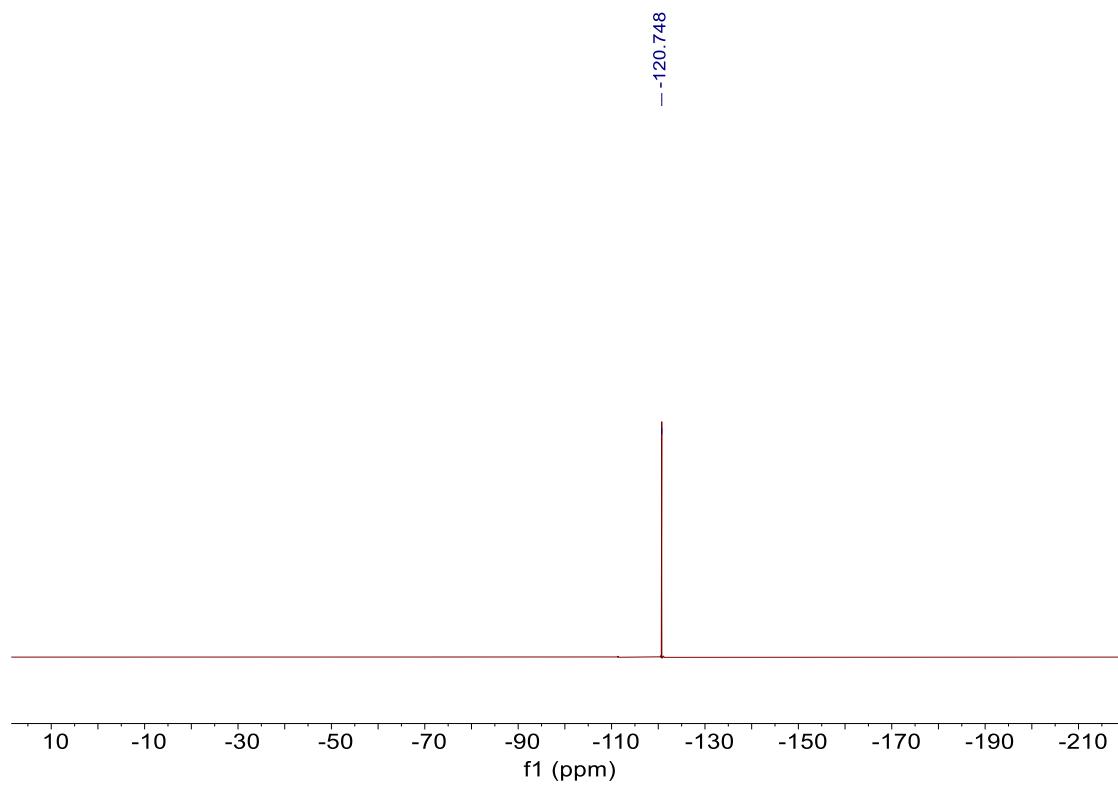

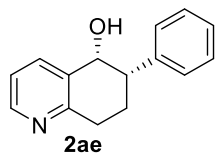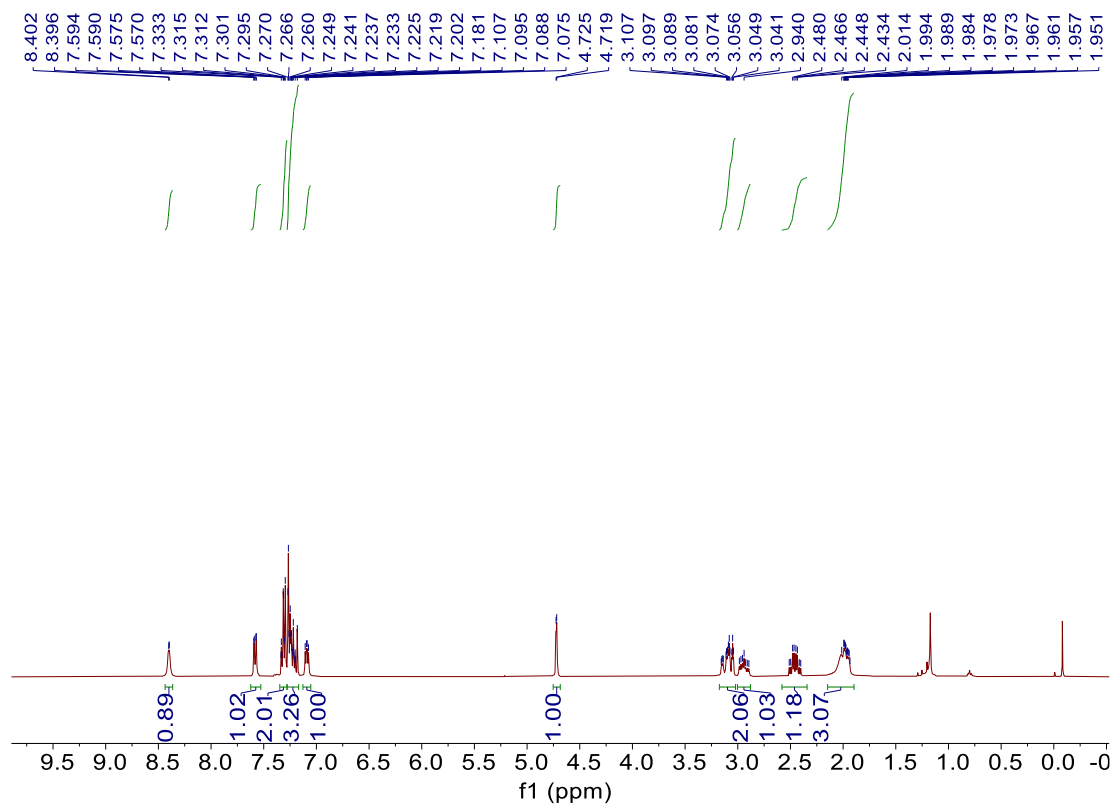

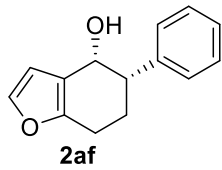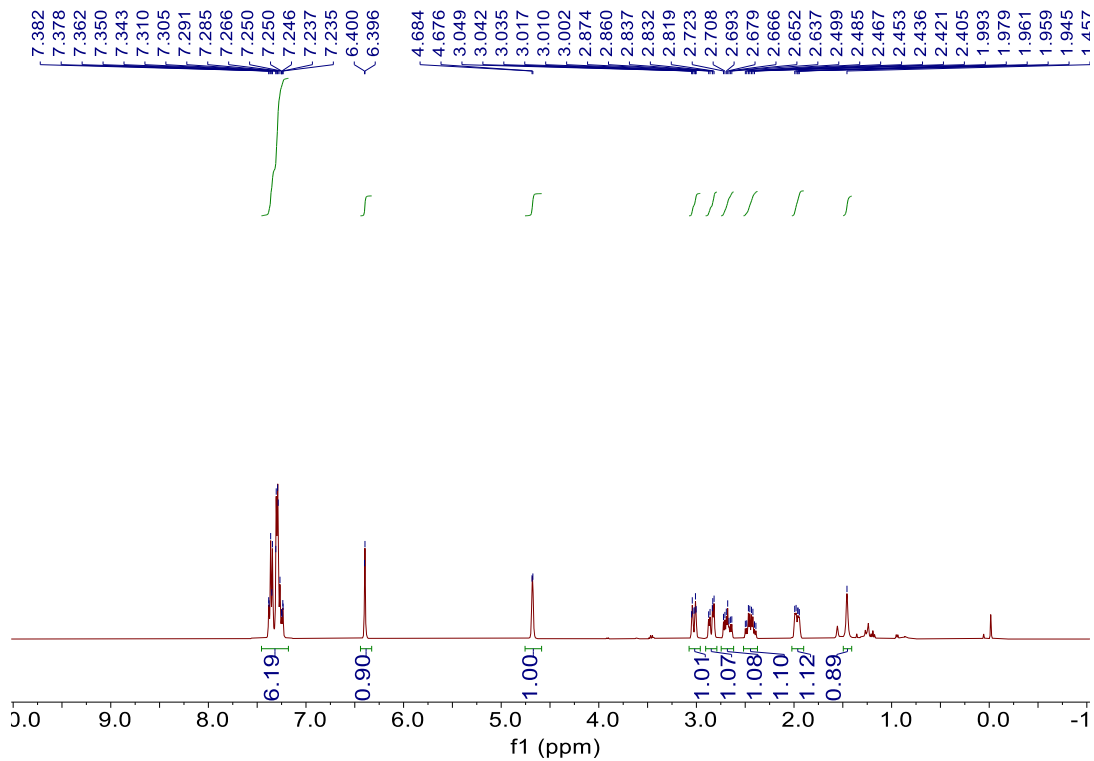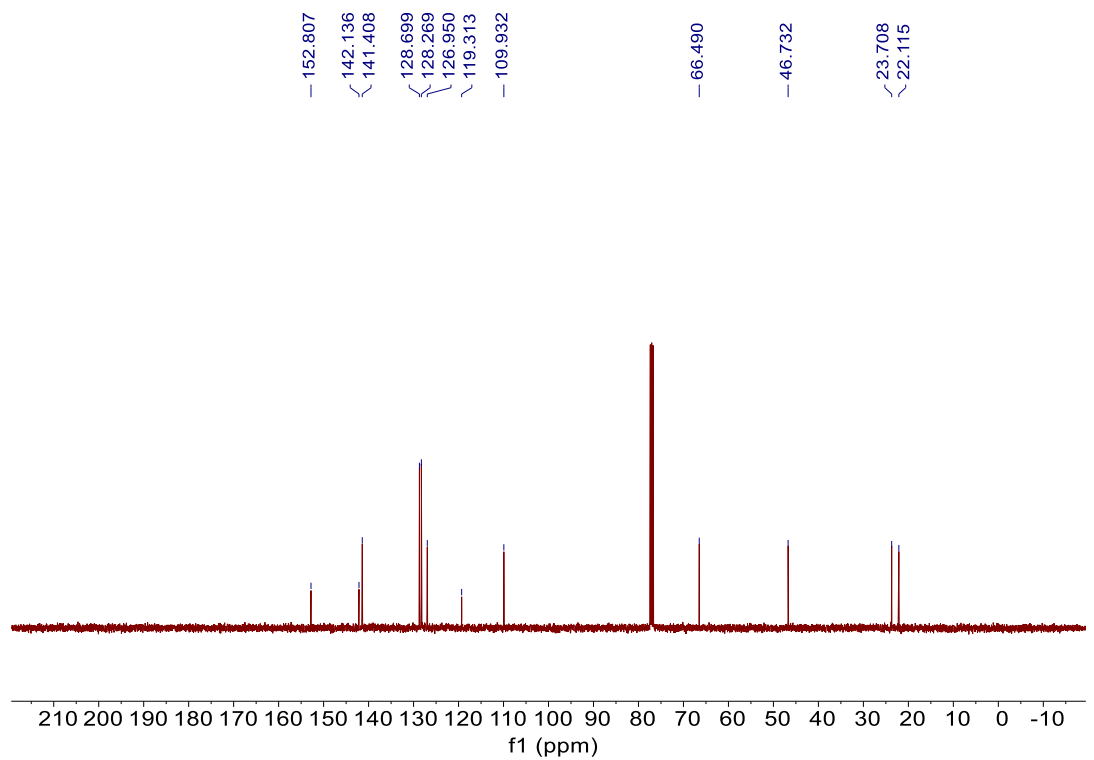

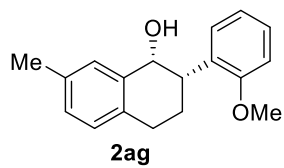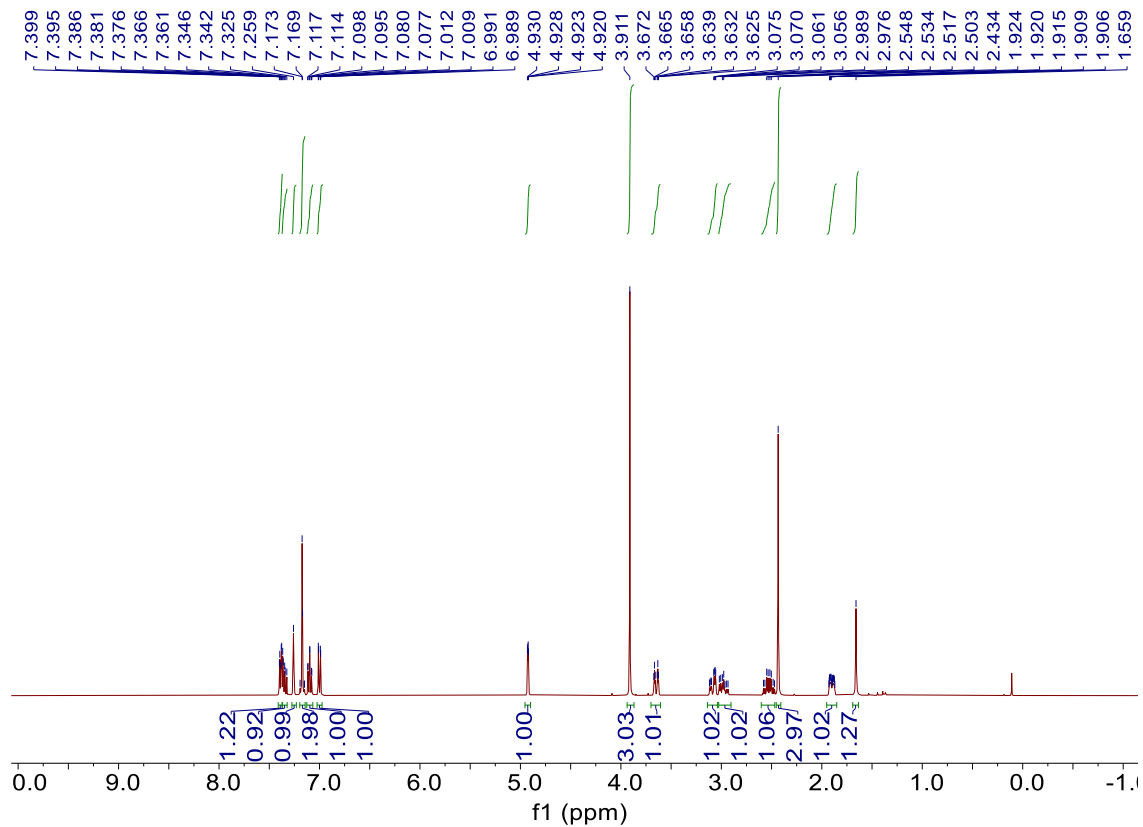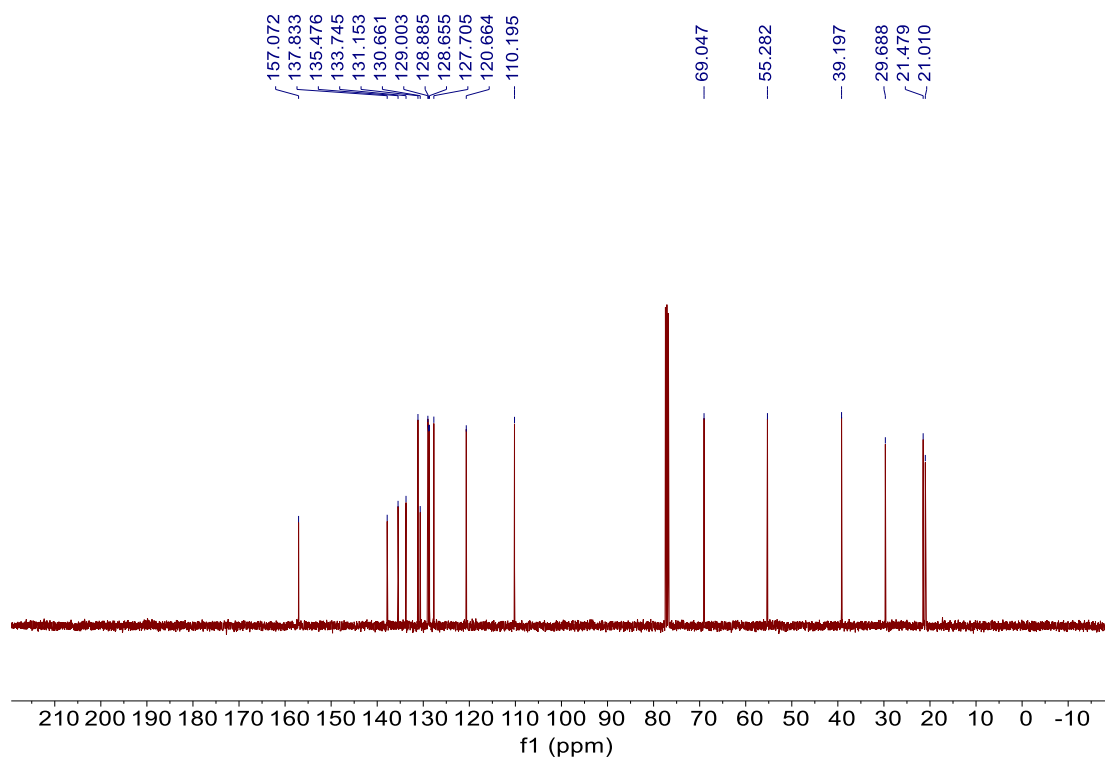





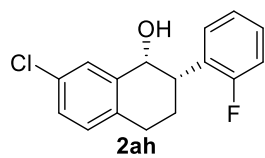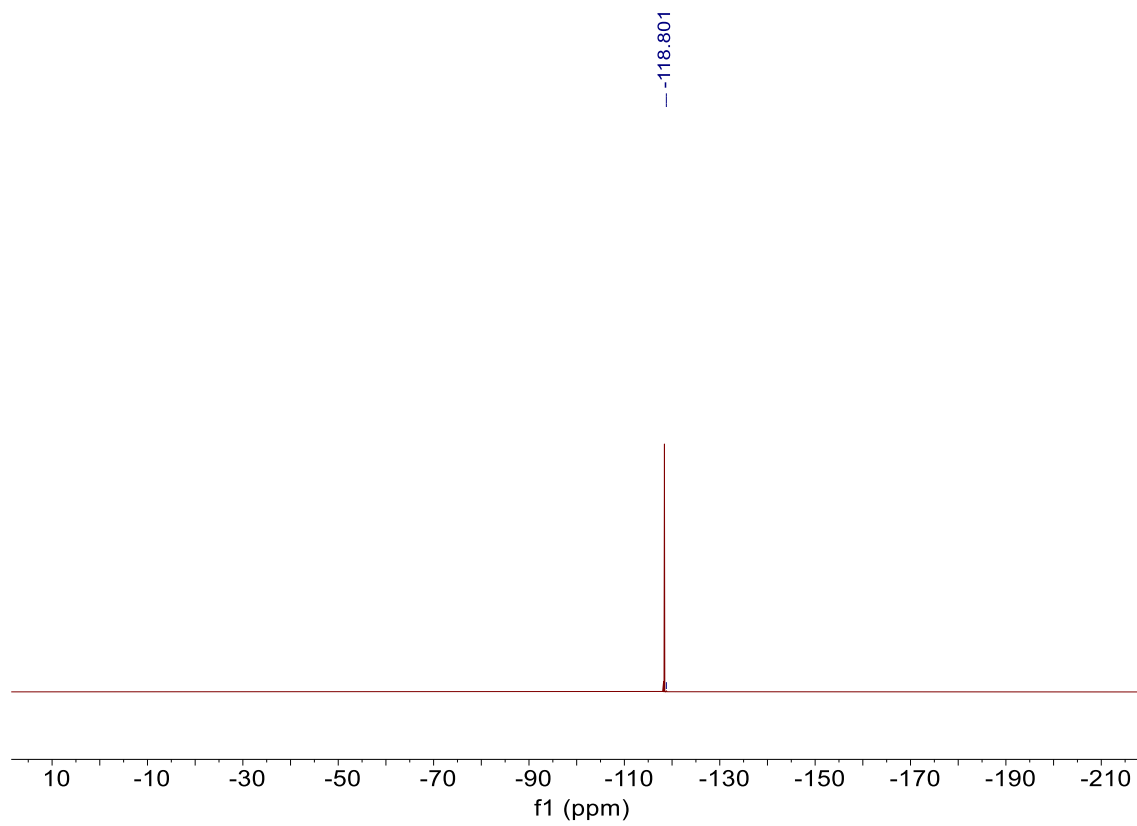

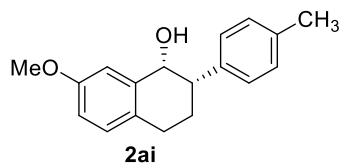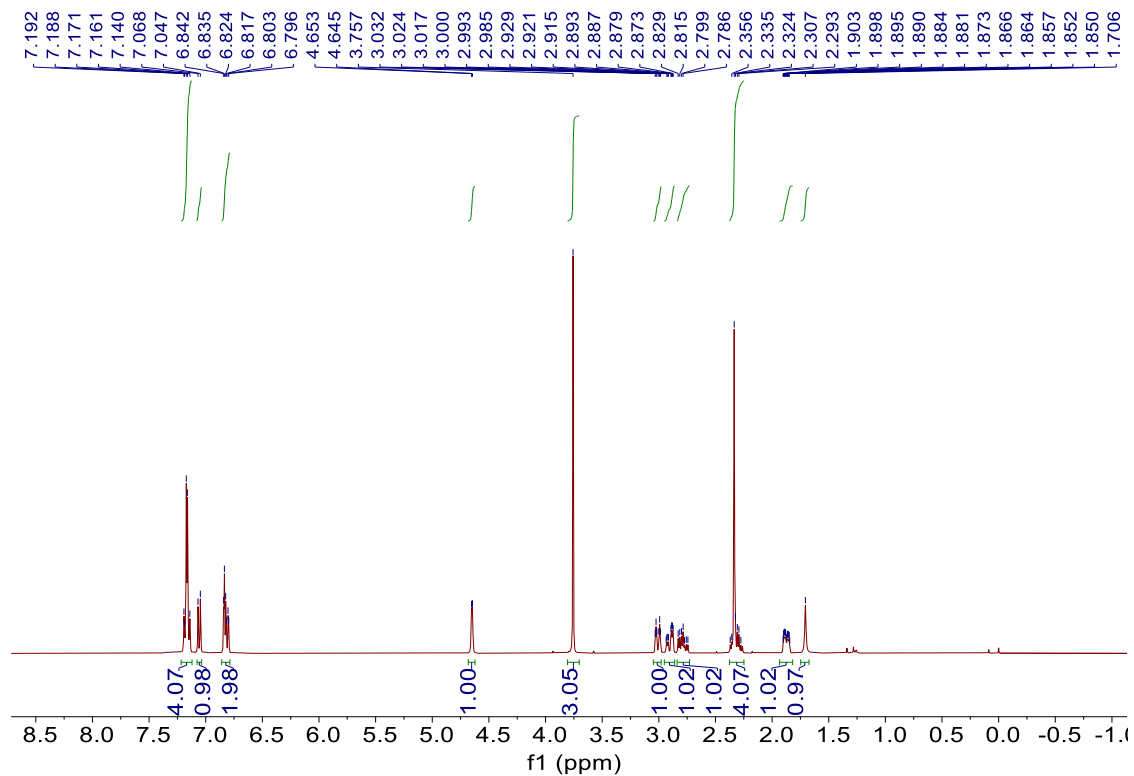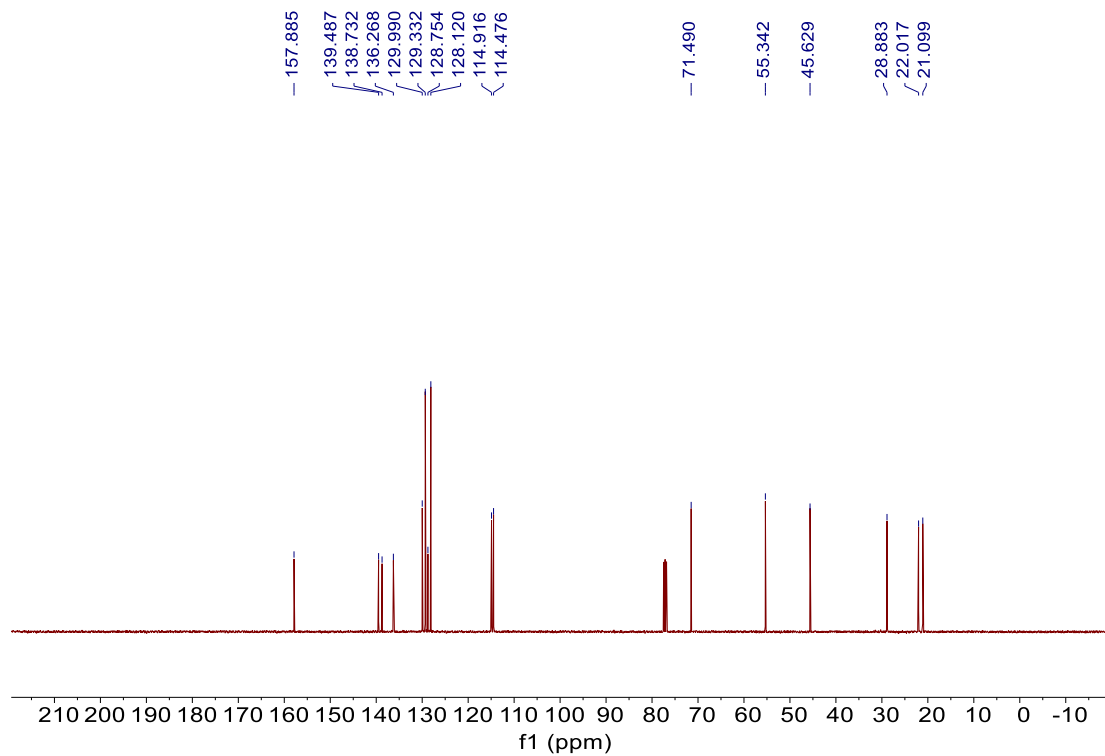

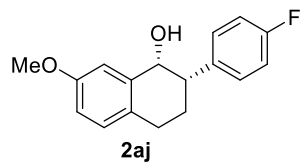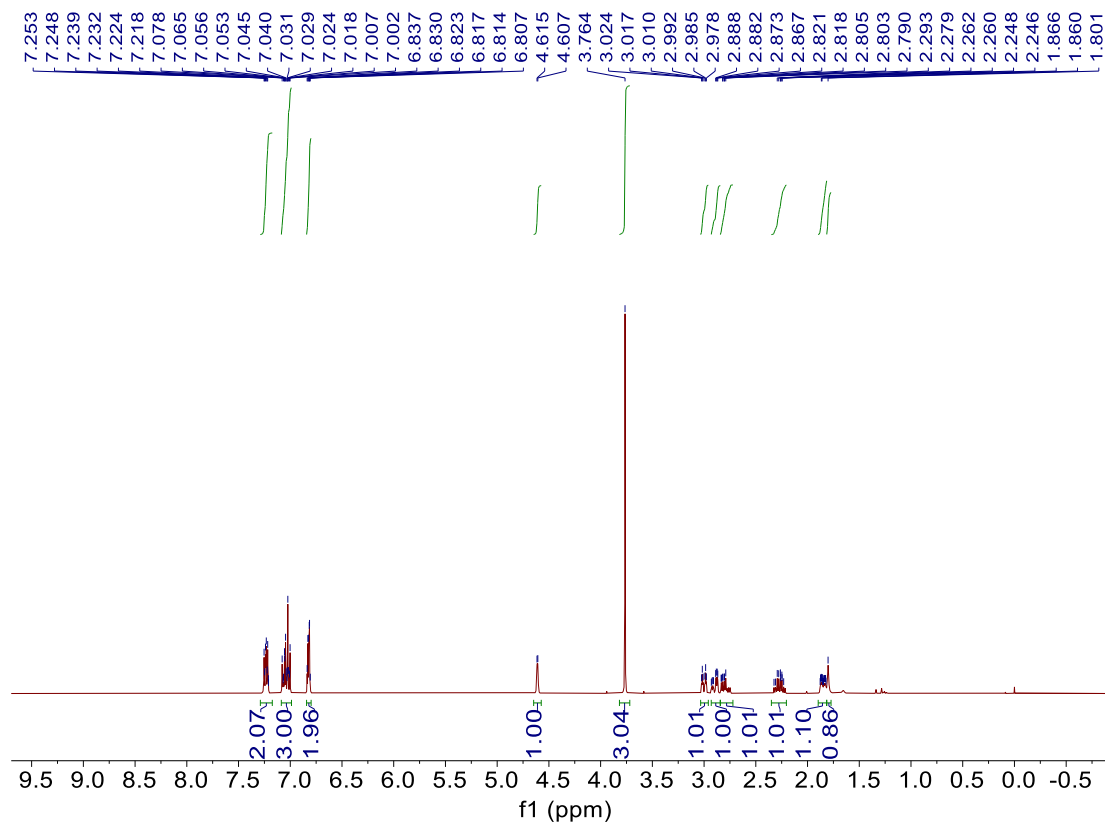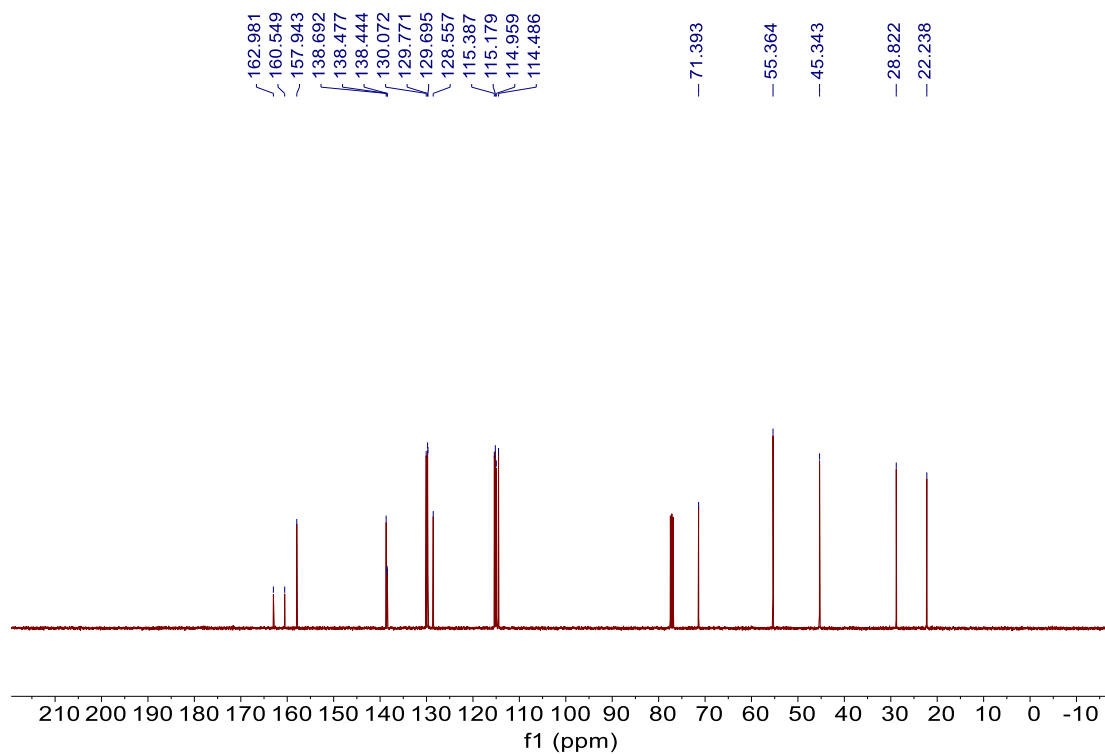

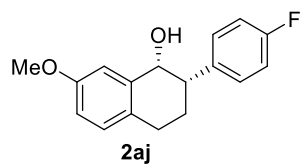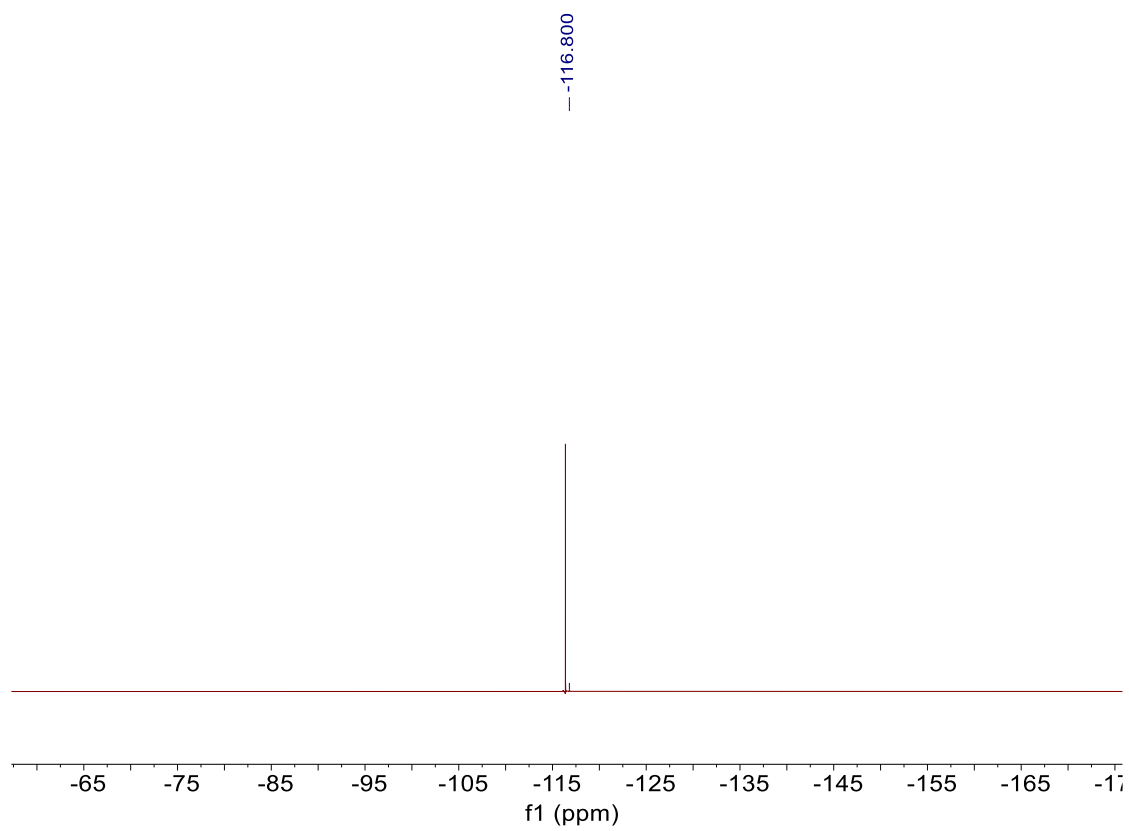

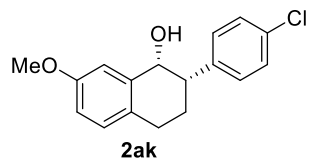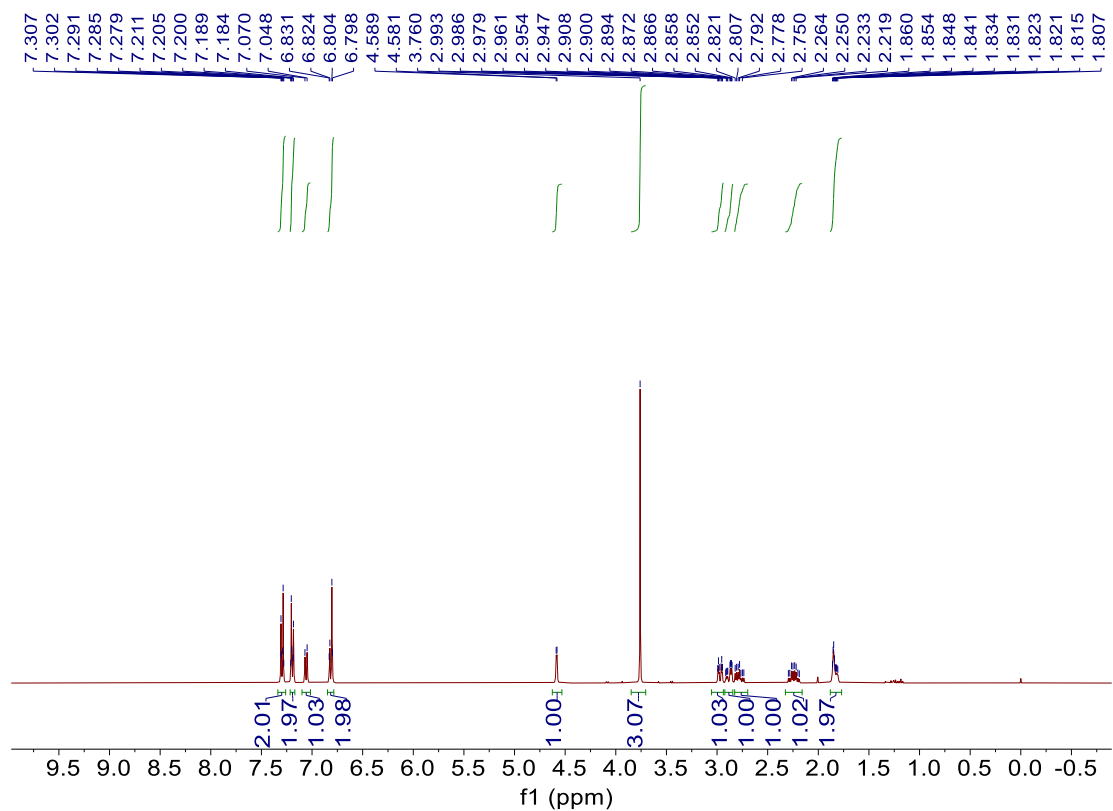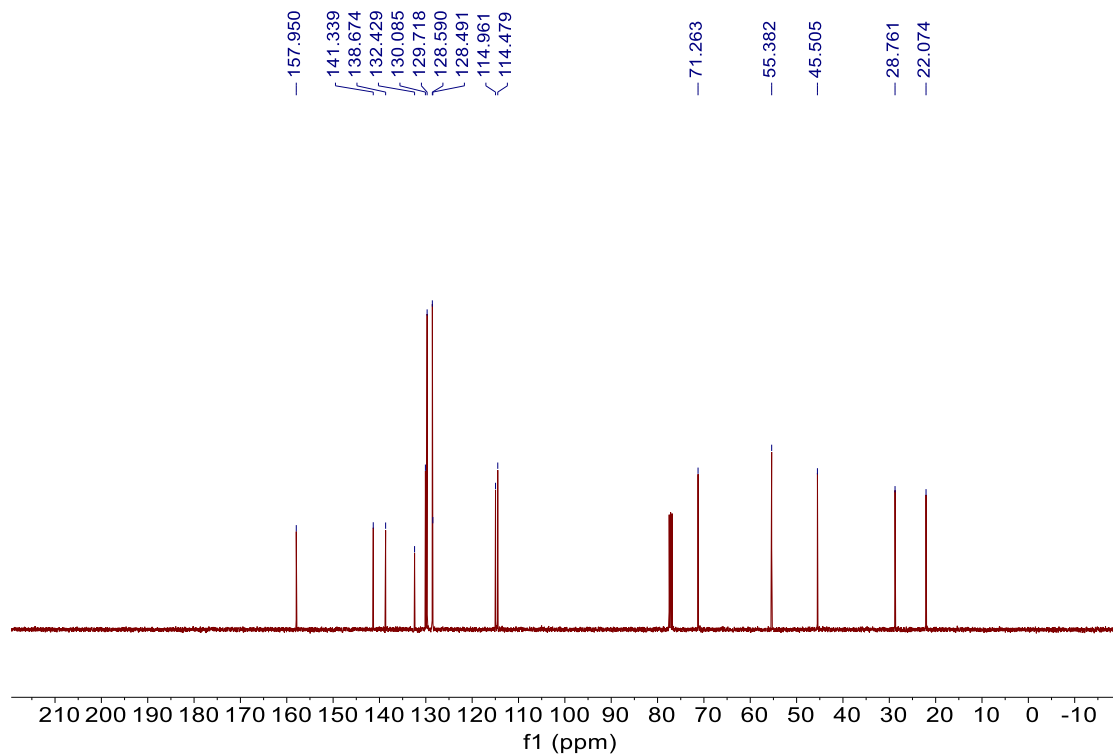

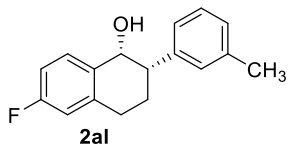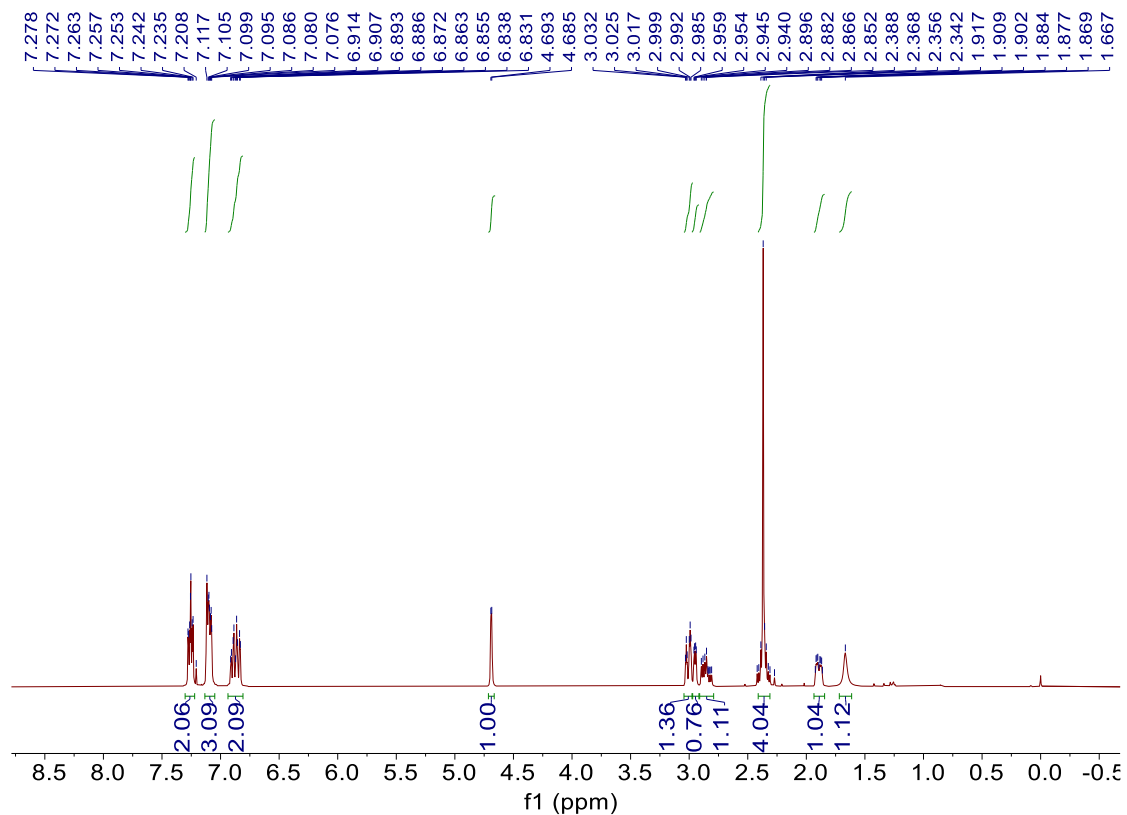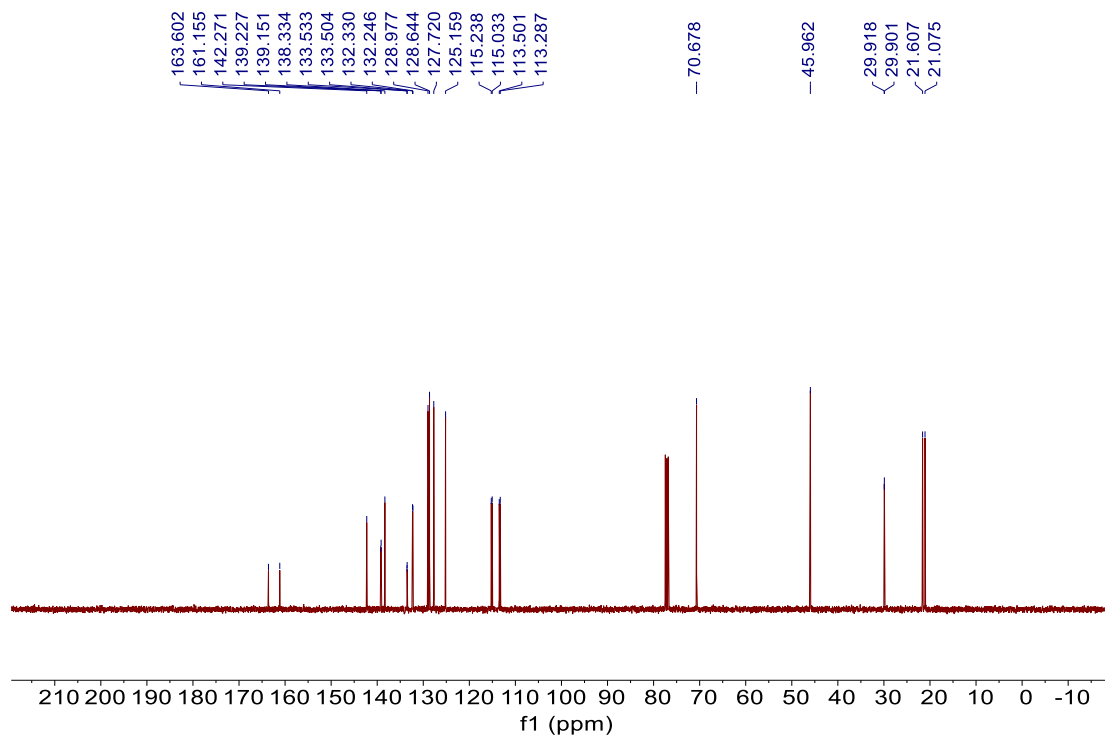

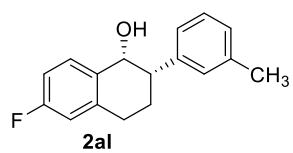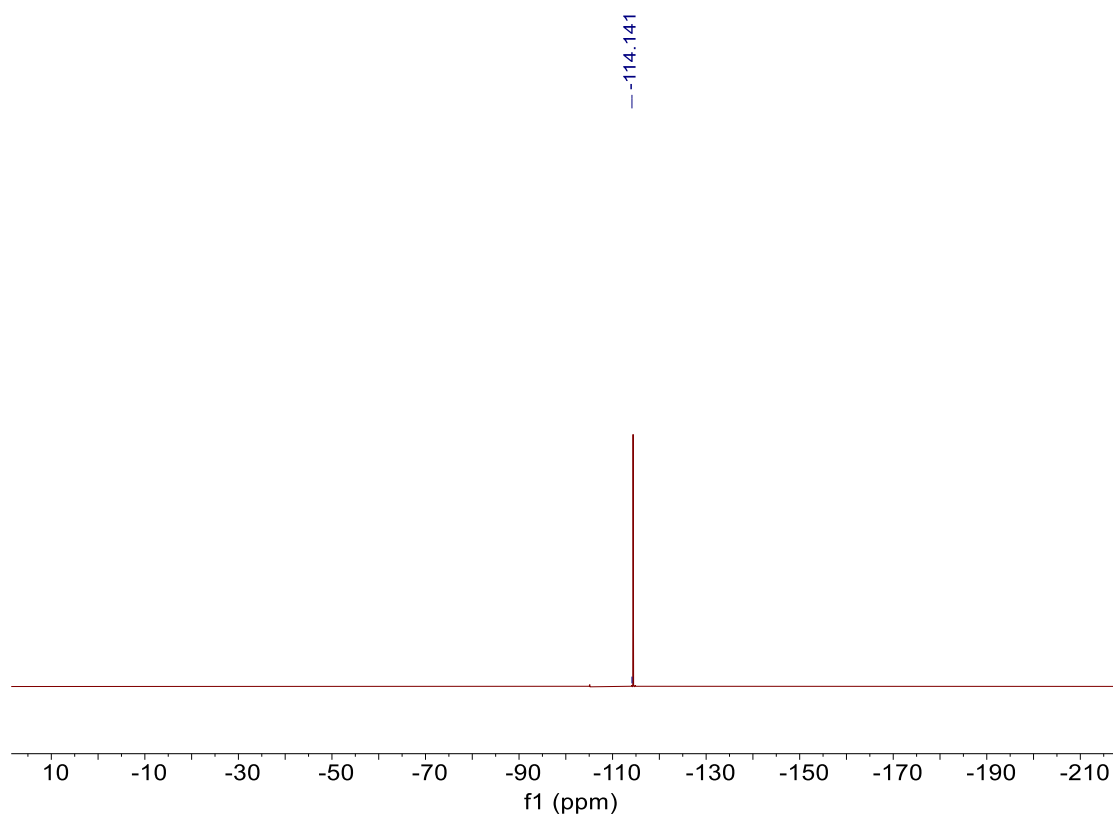



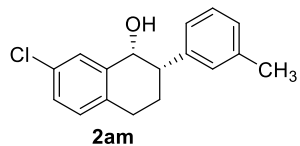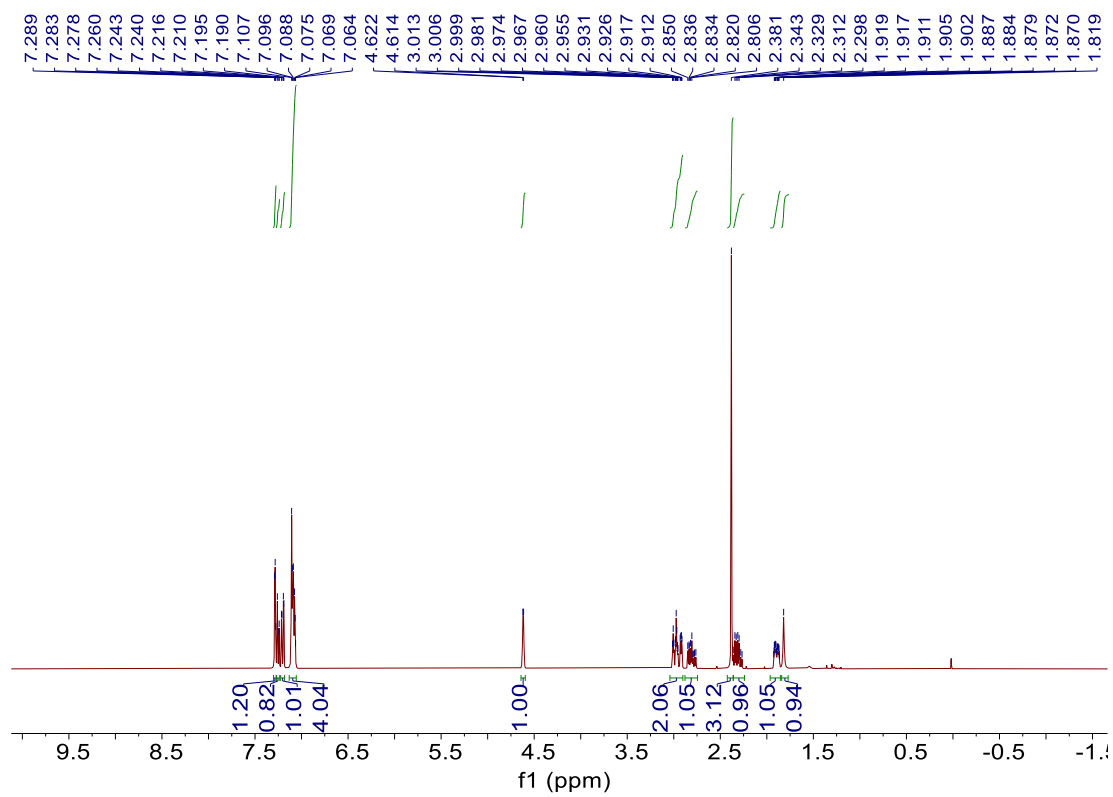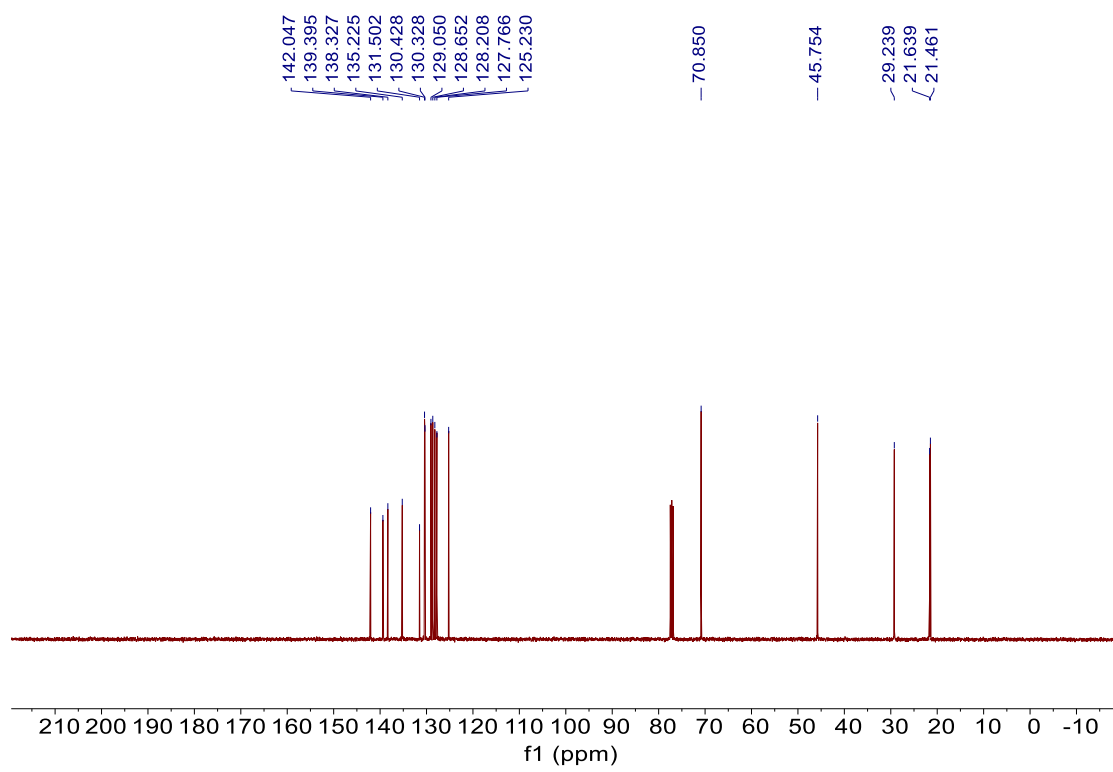

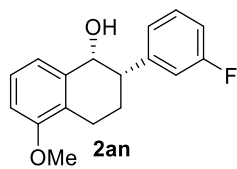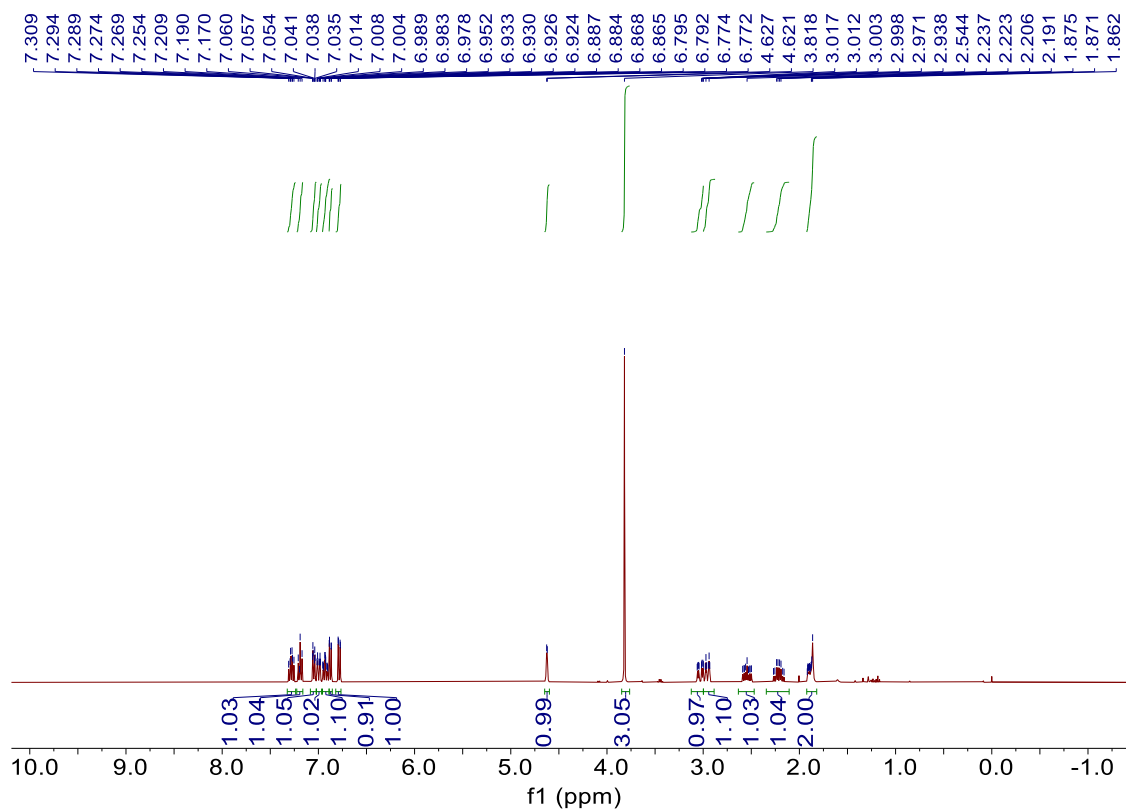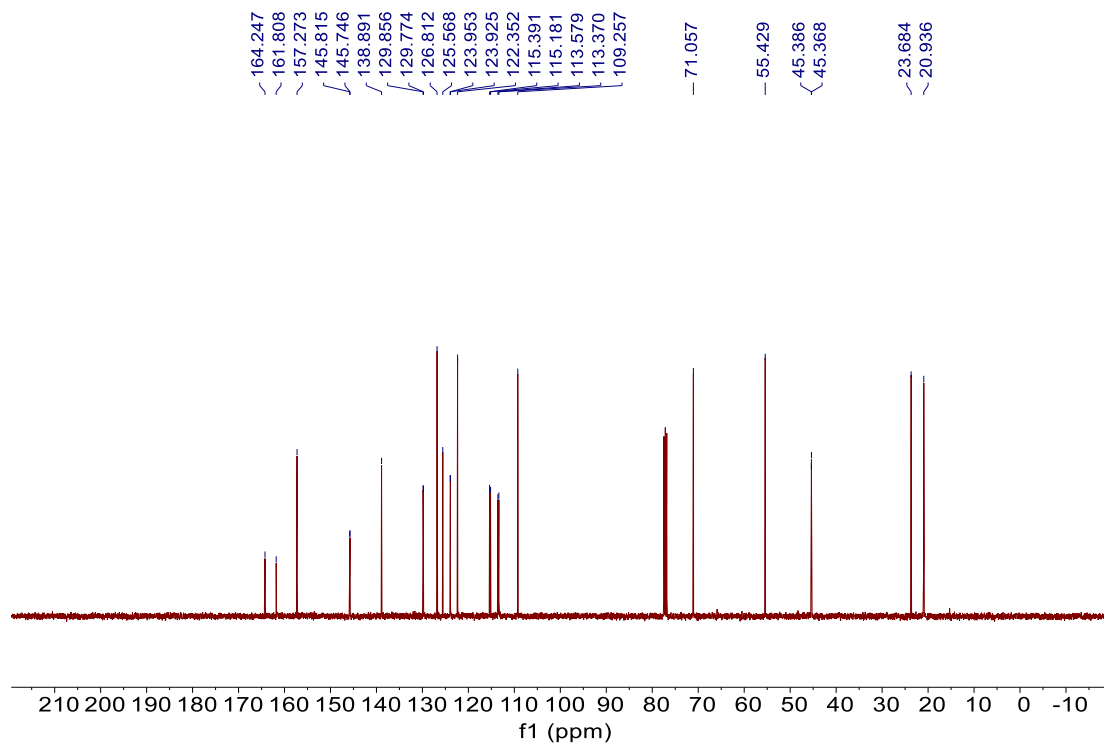

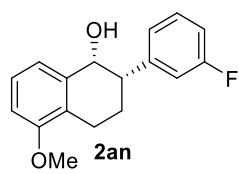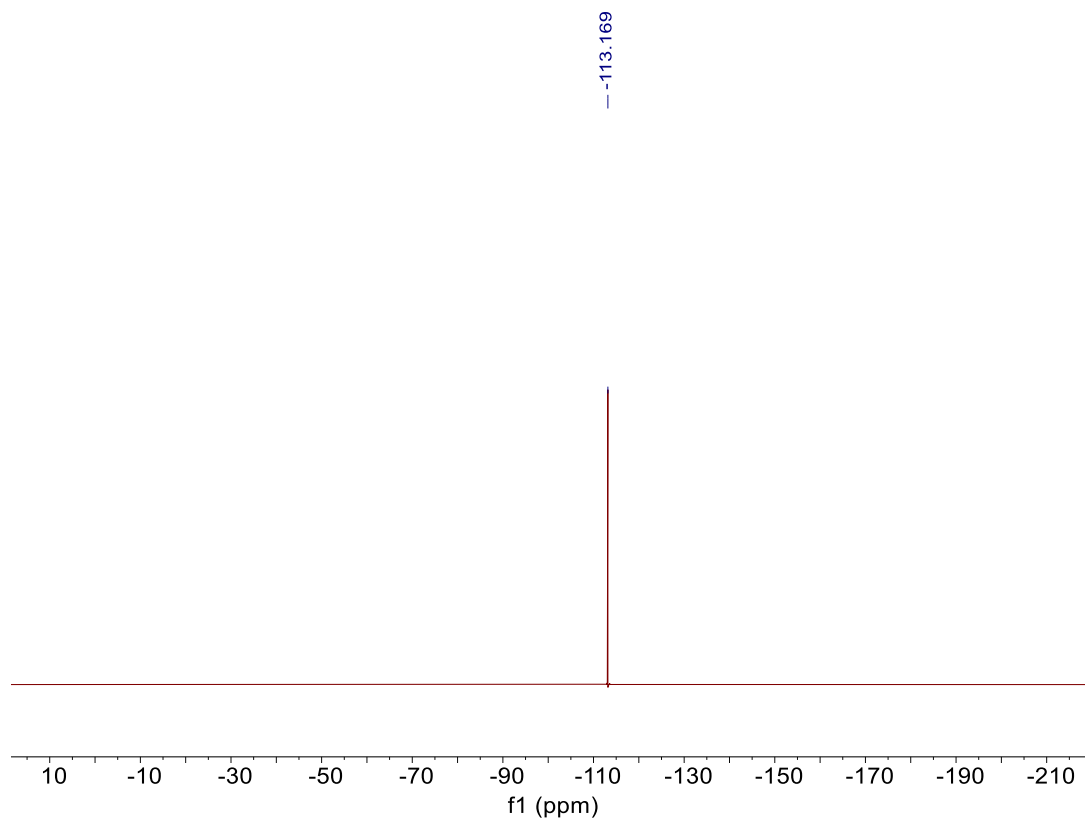

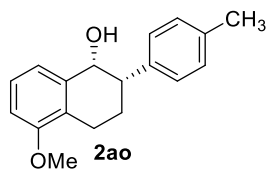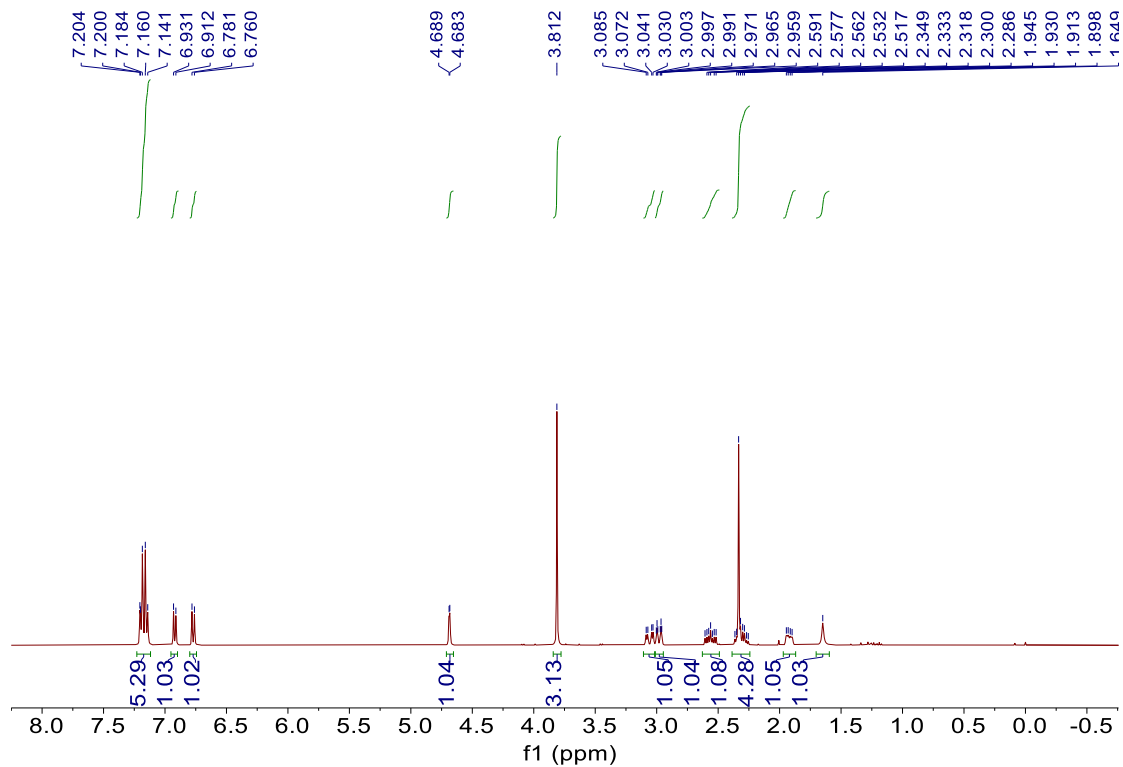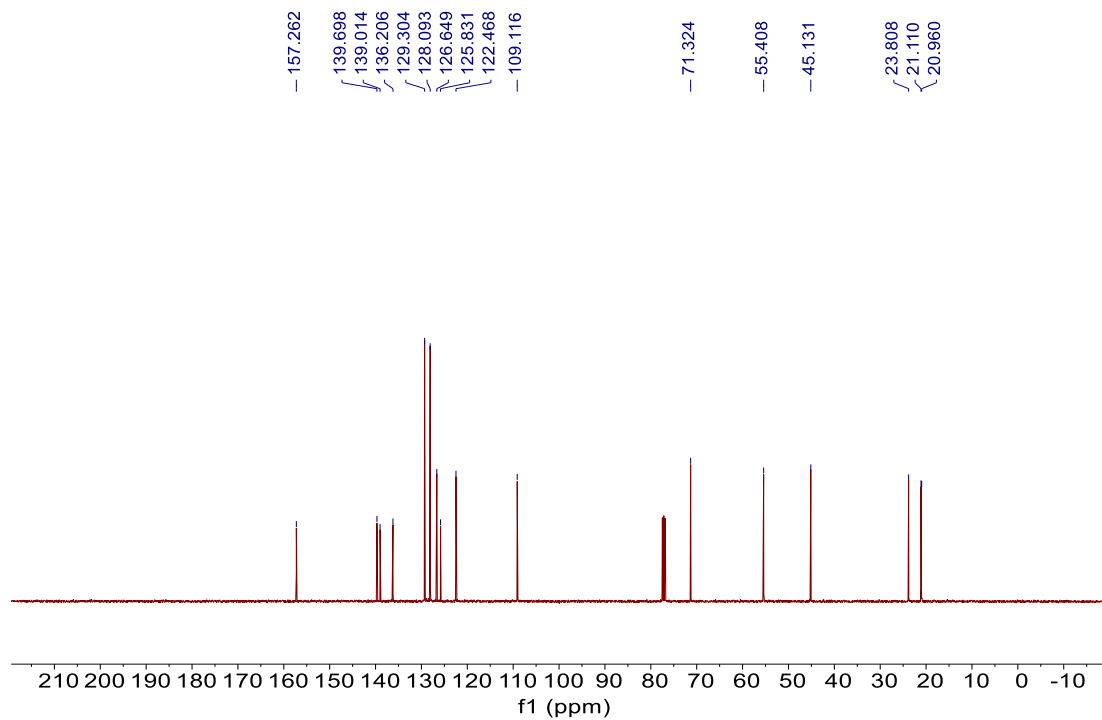

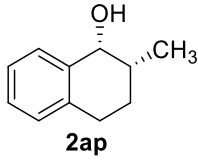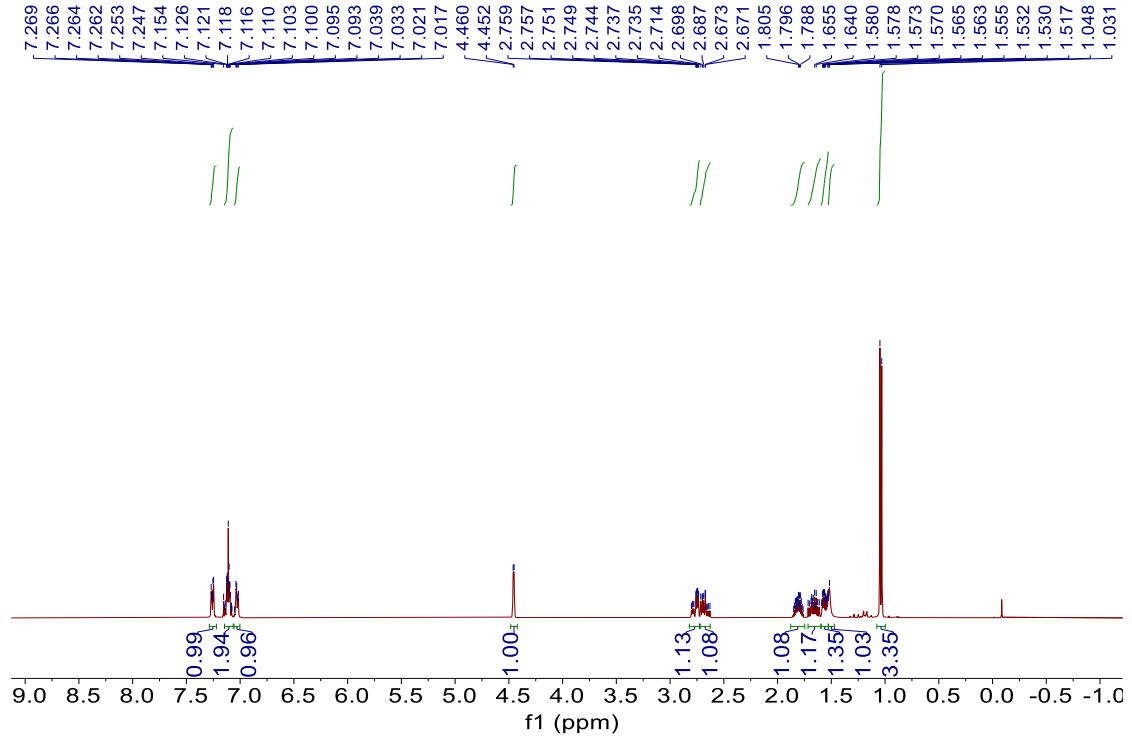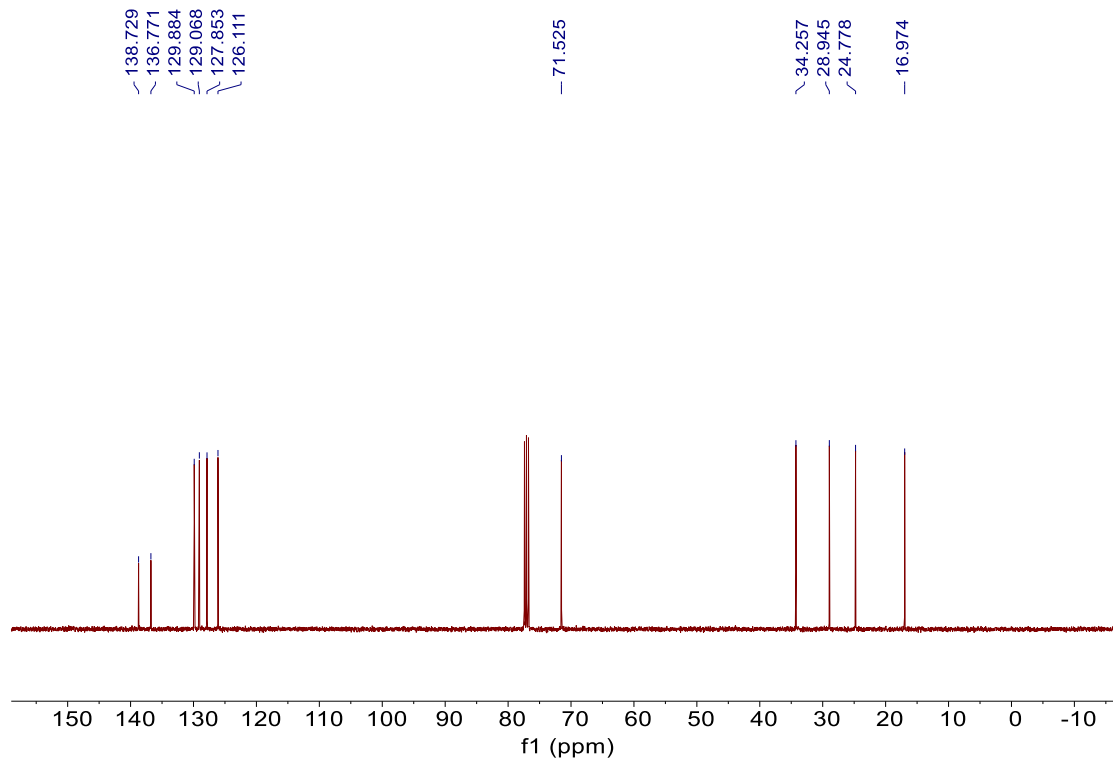

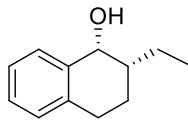

2aq

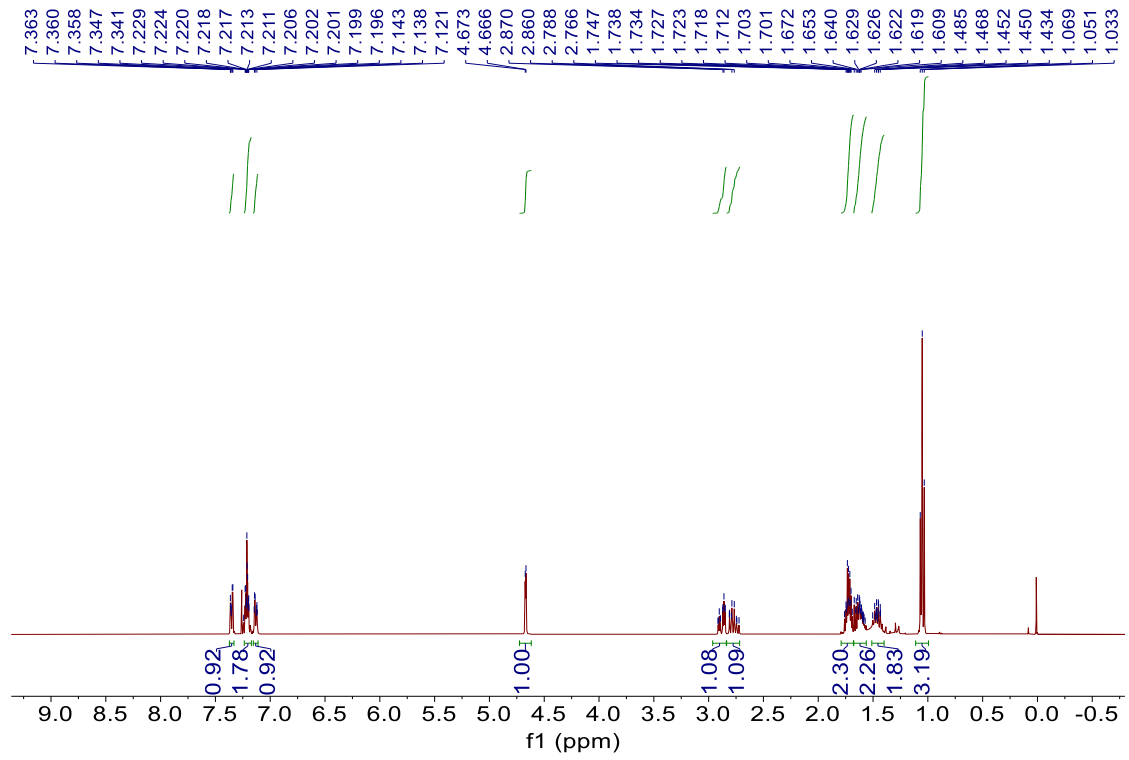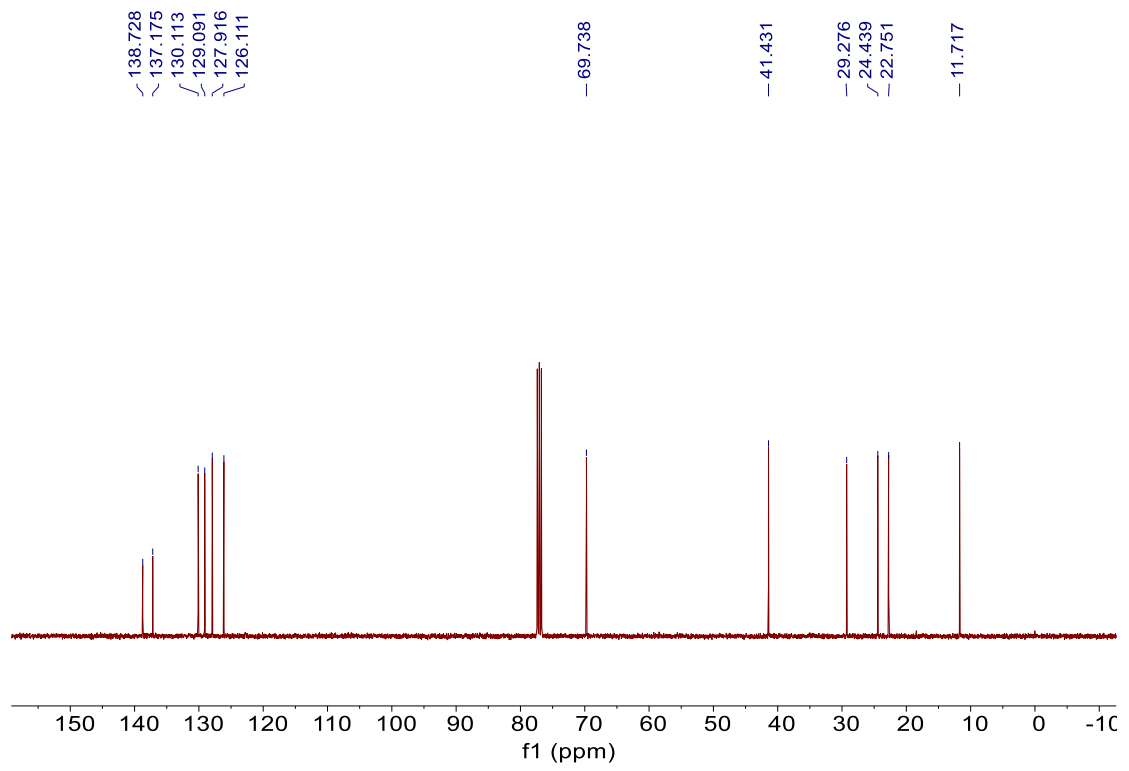

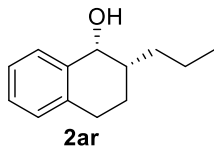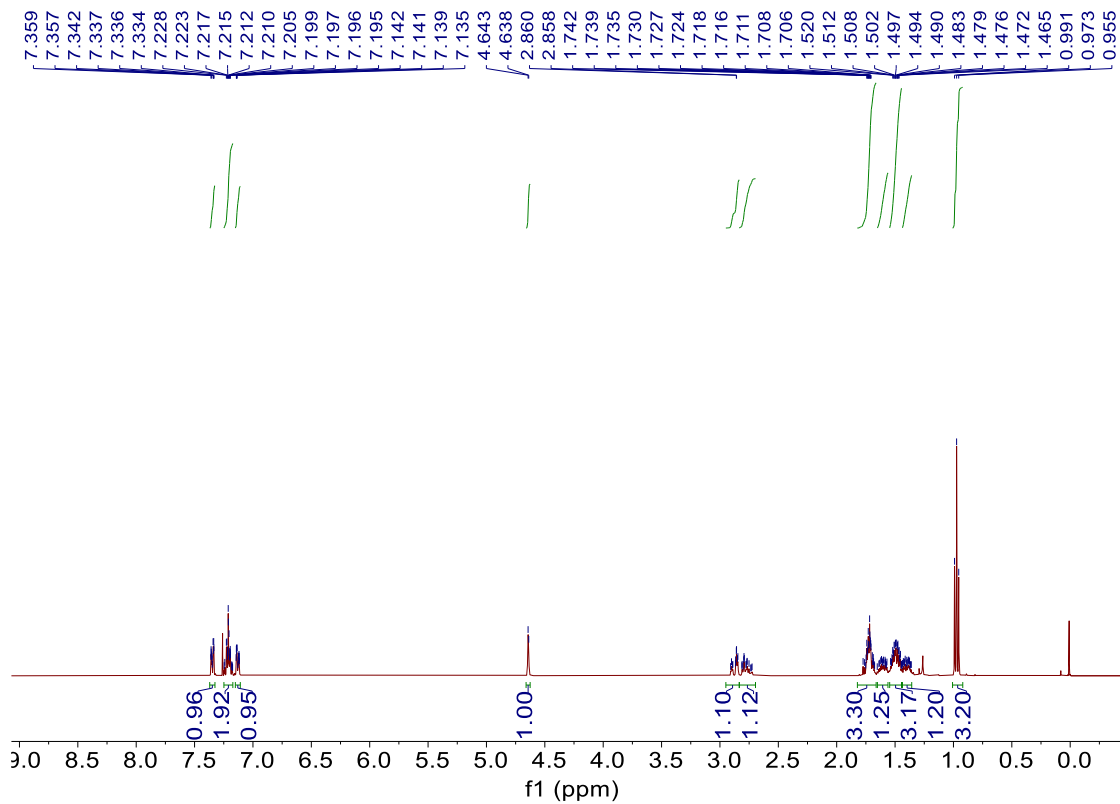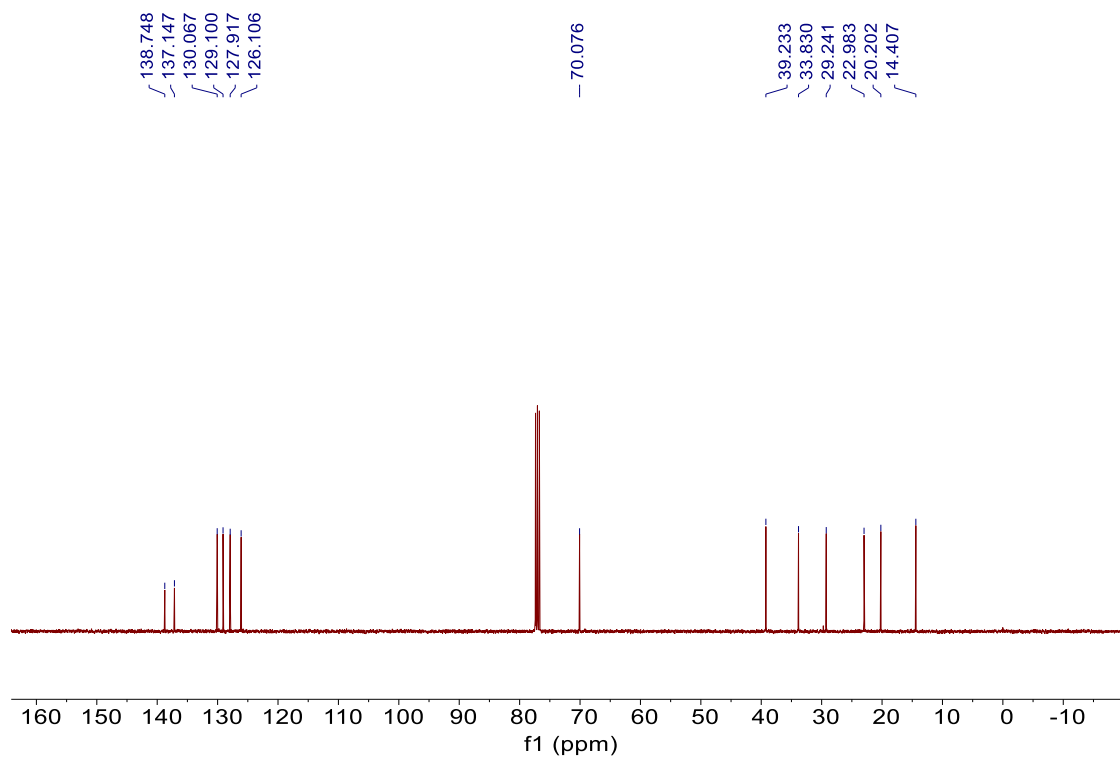

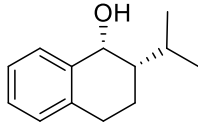

**2as**

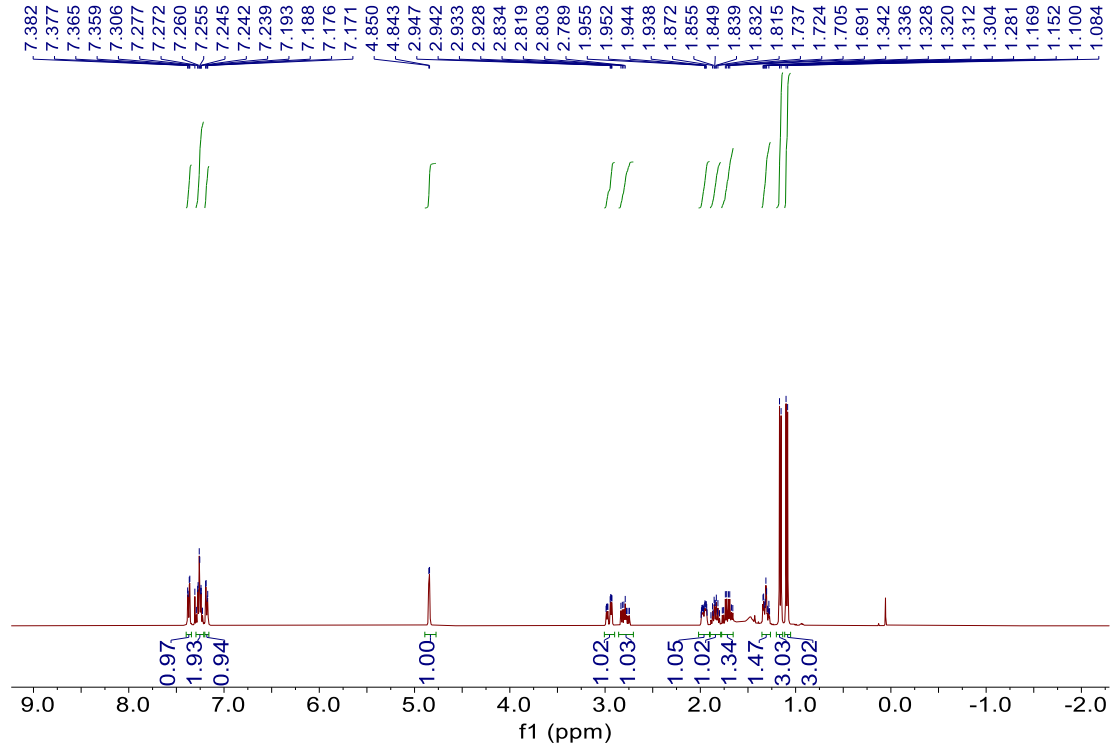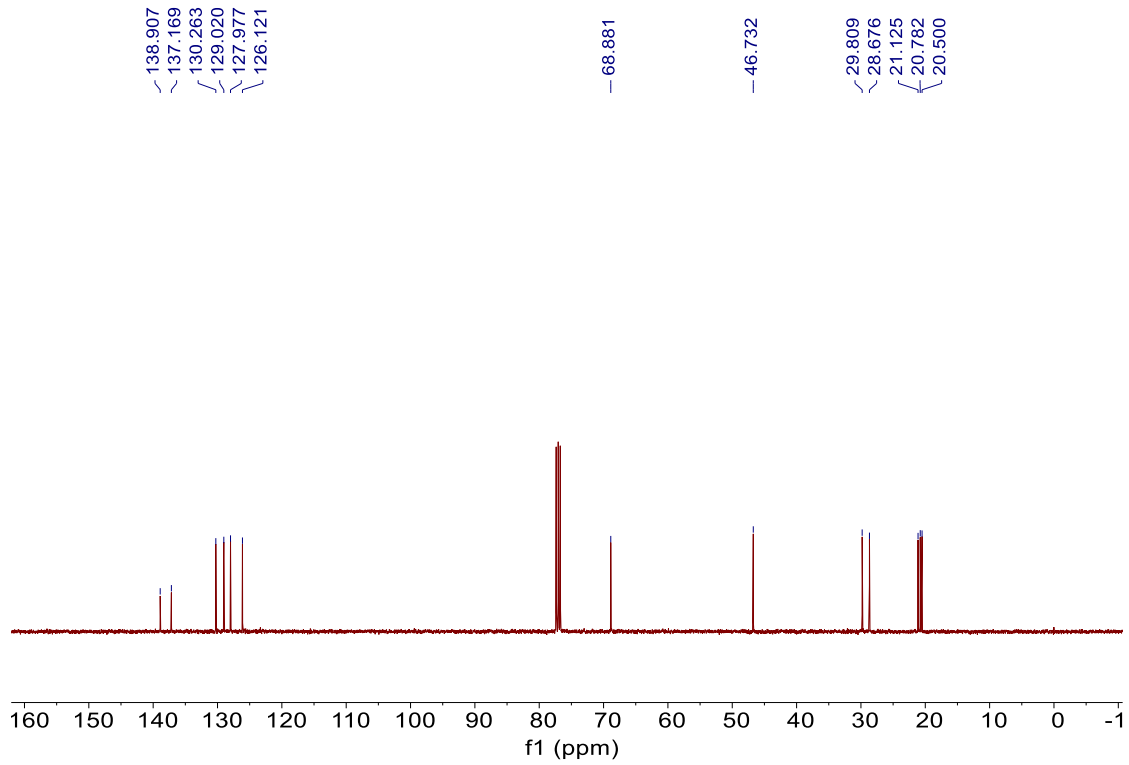



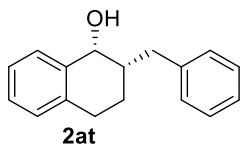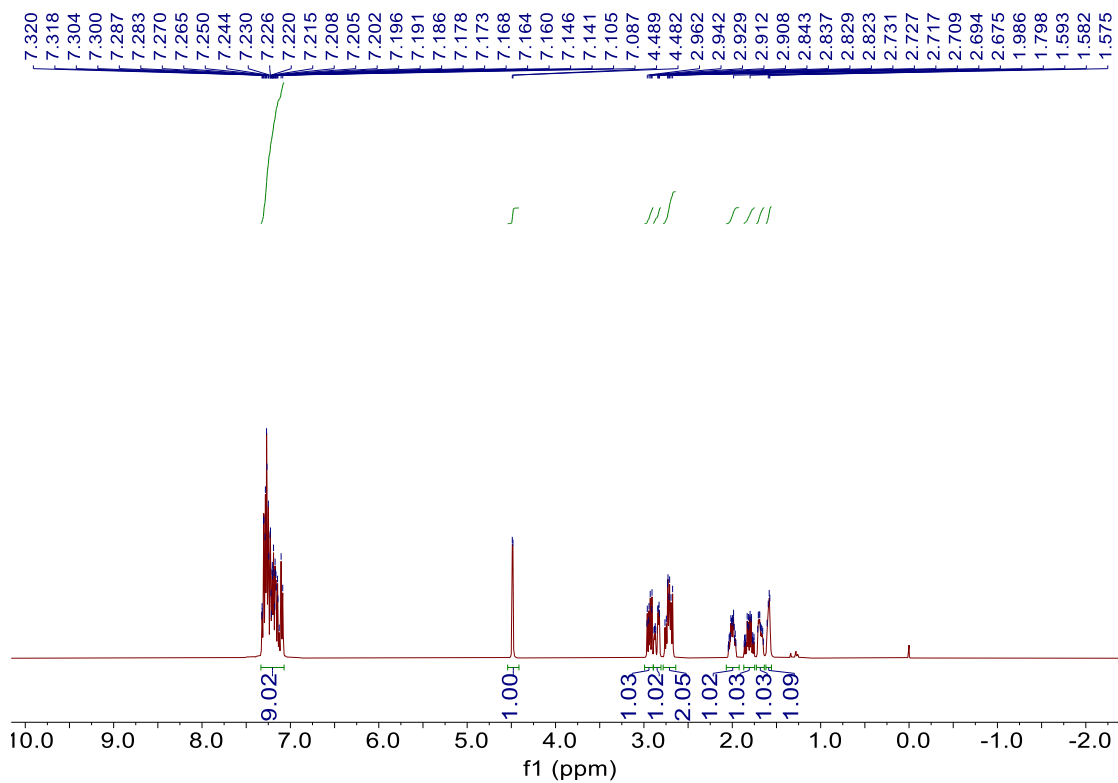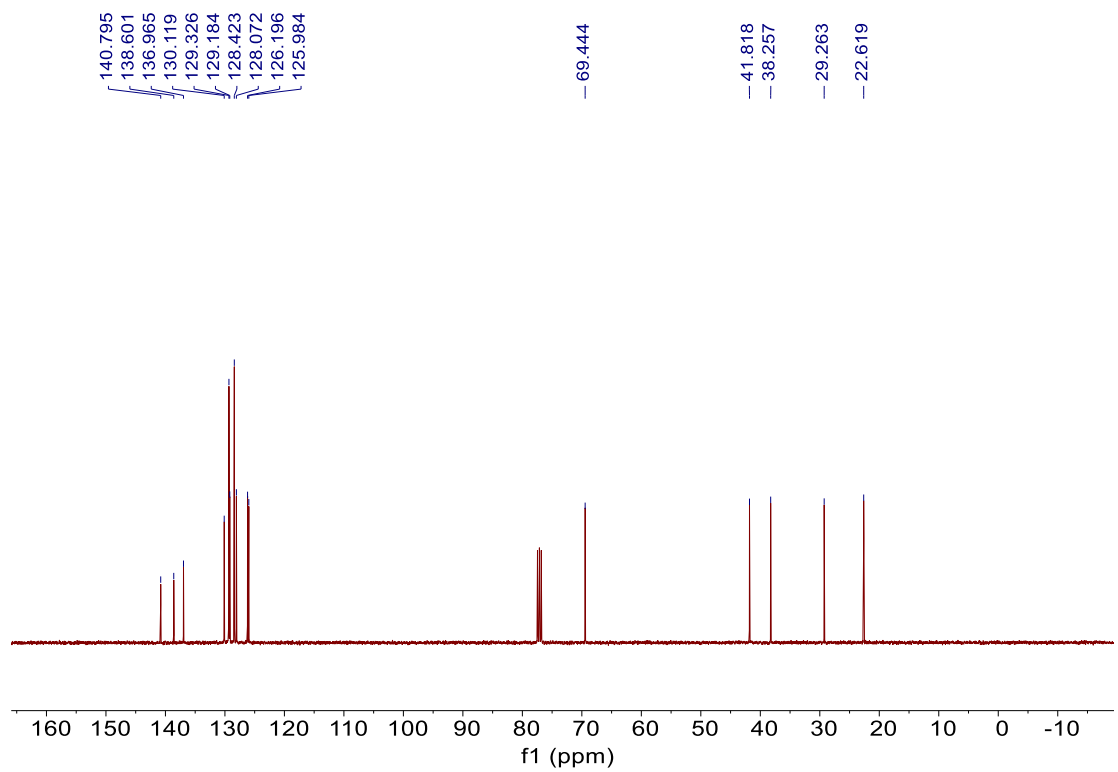

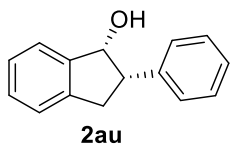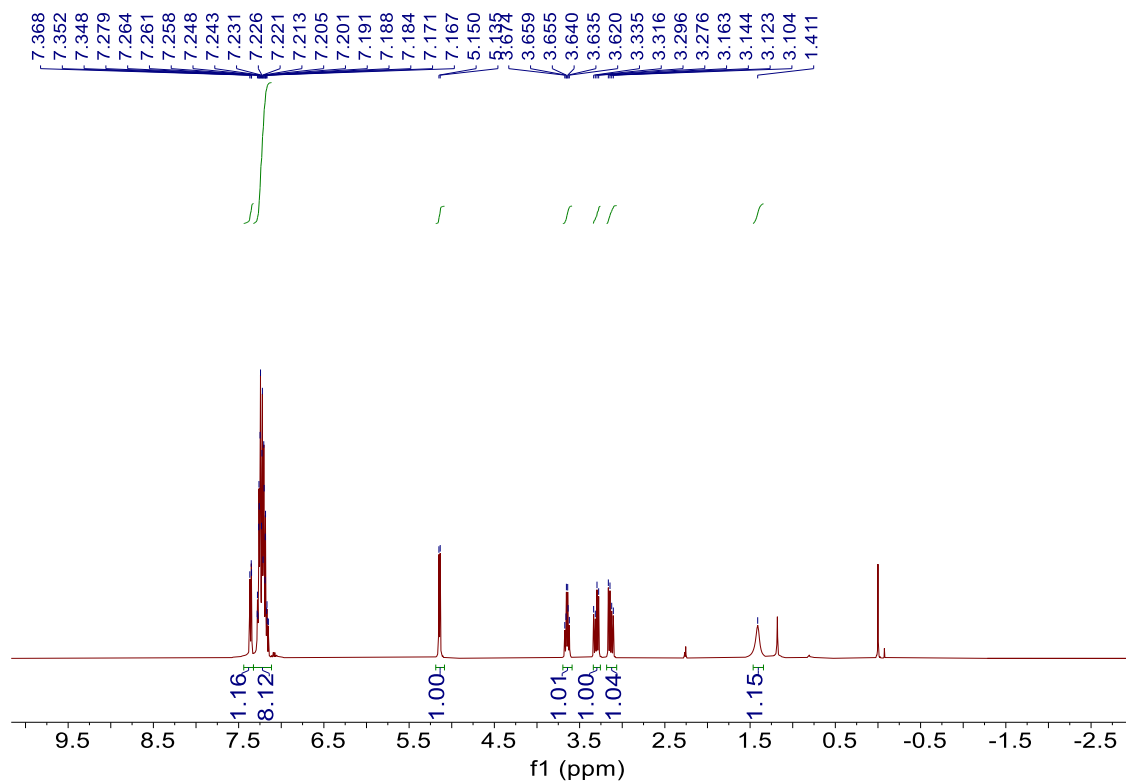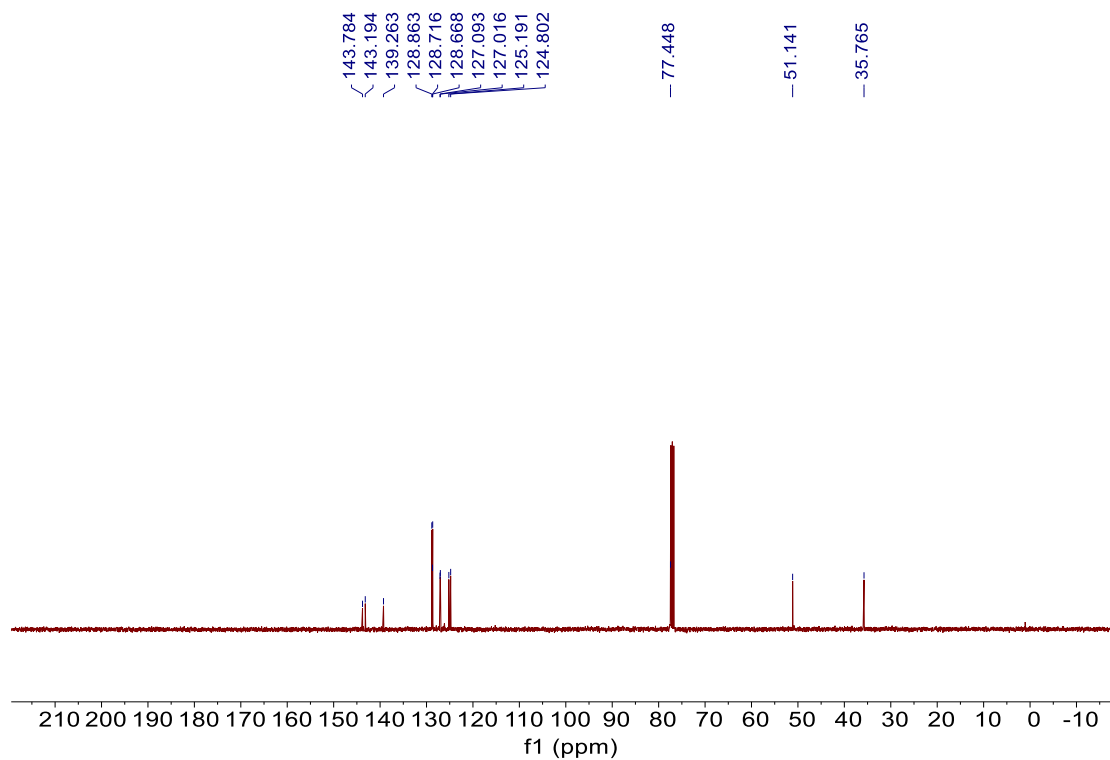

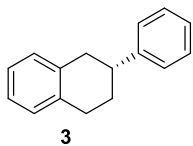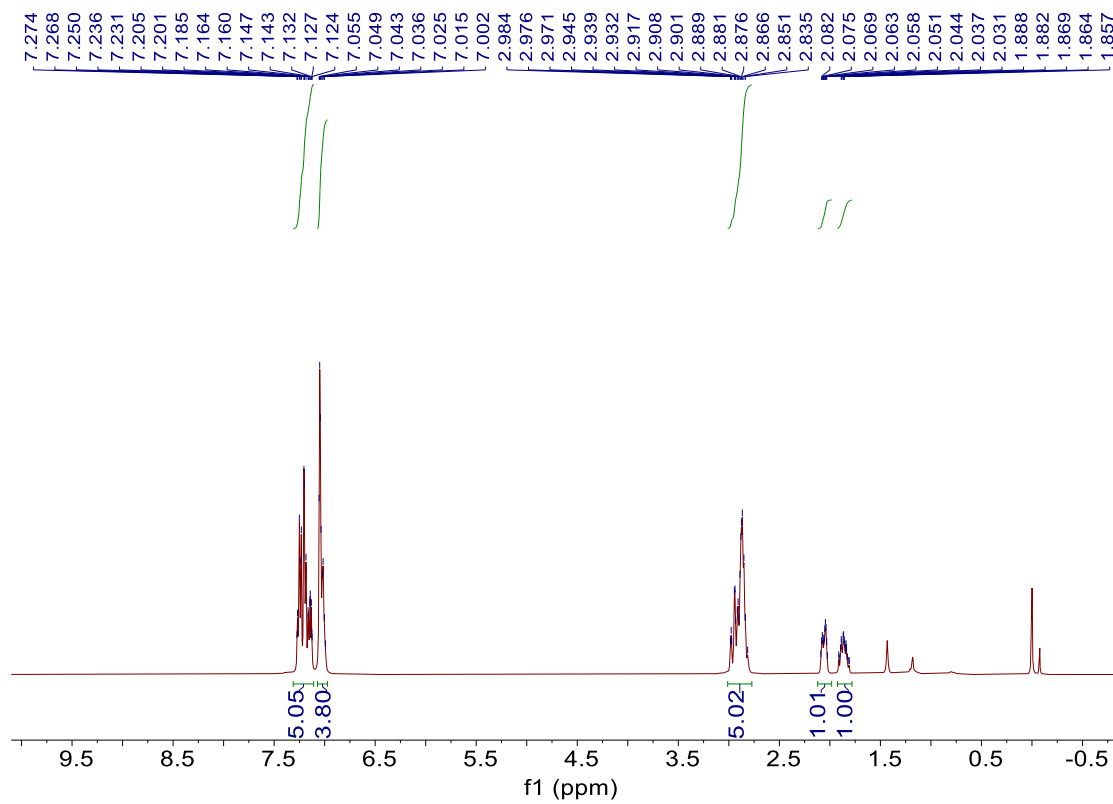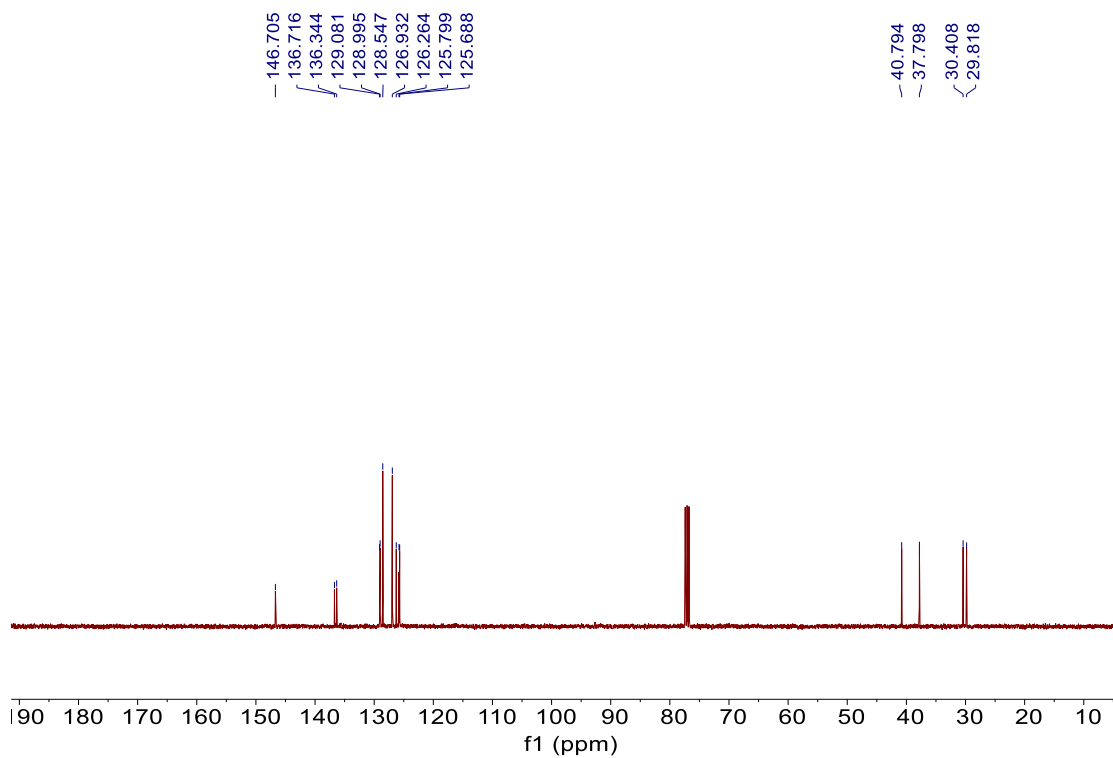

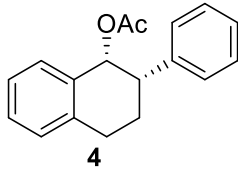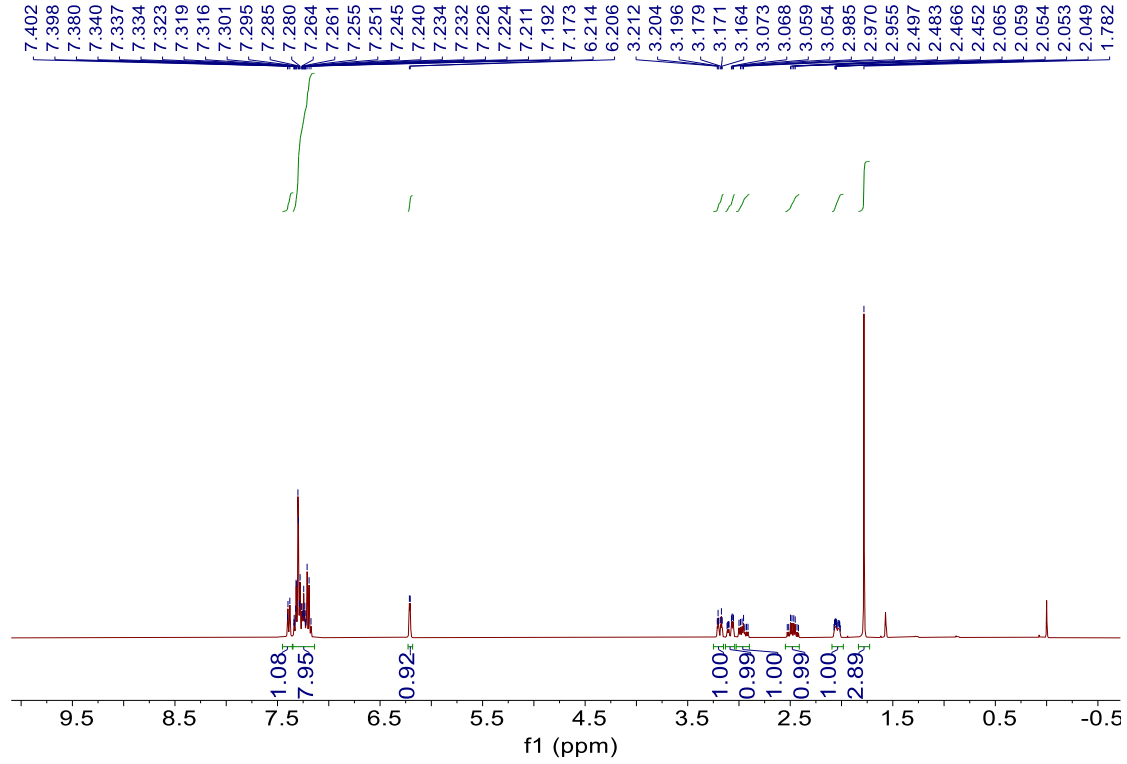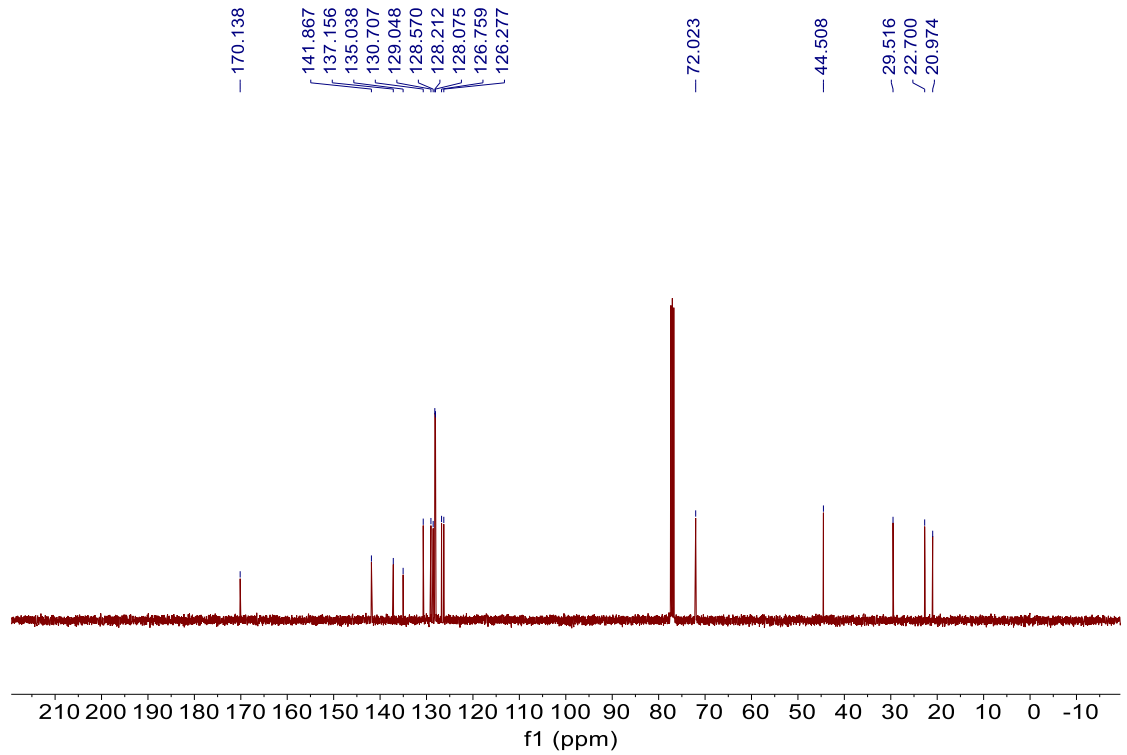

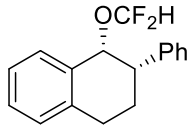

5

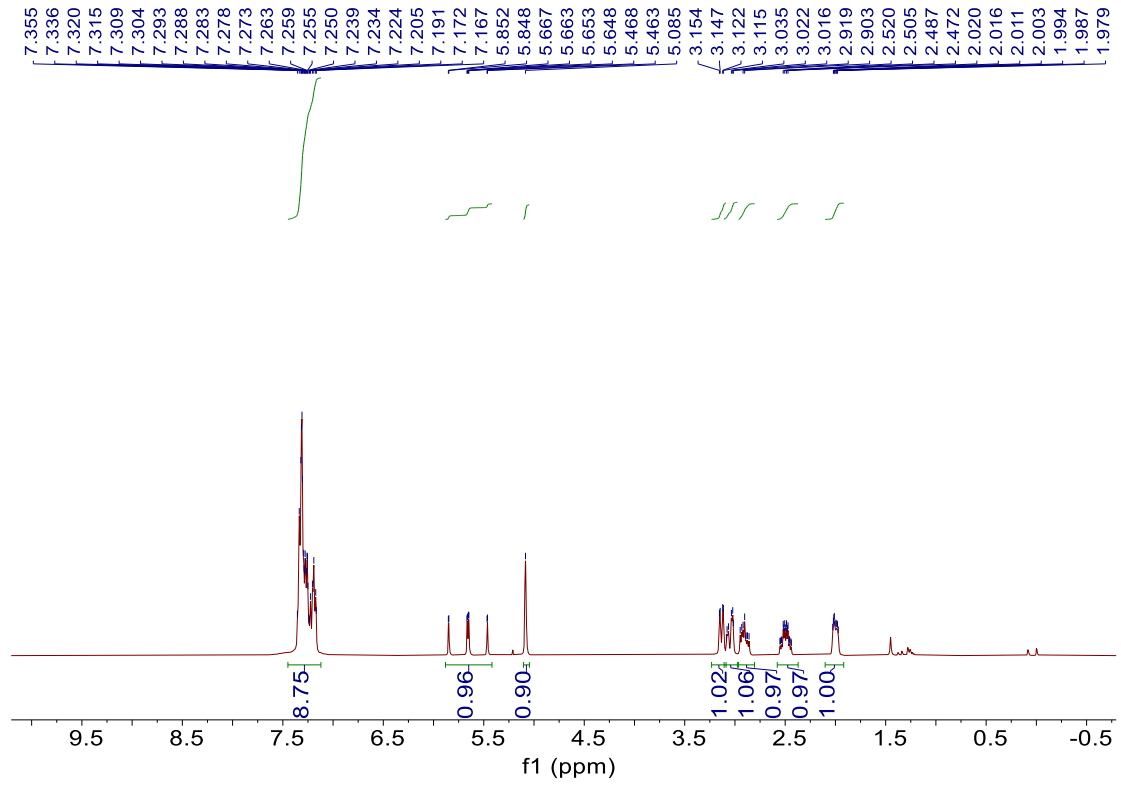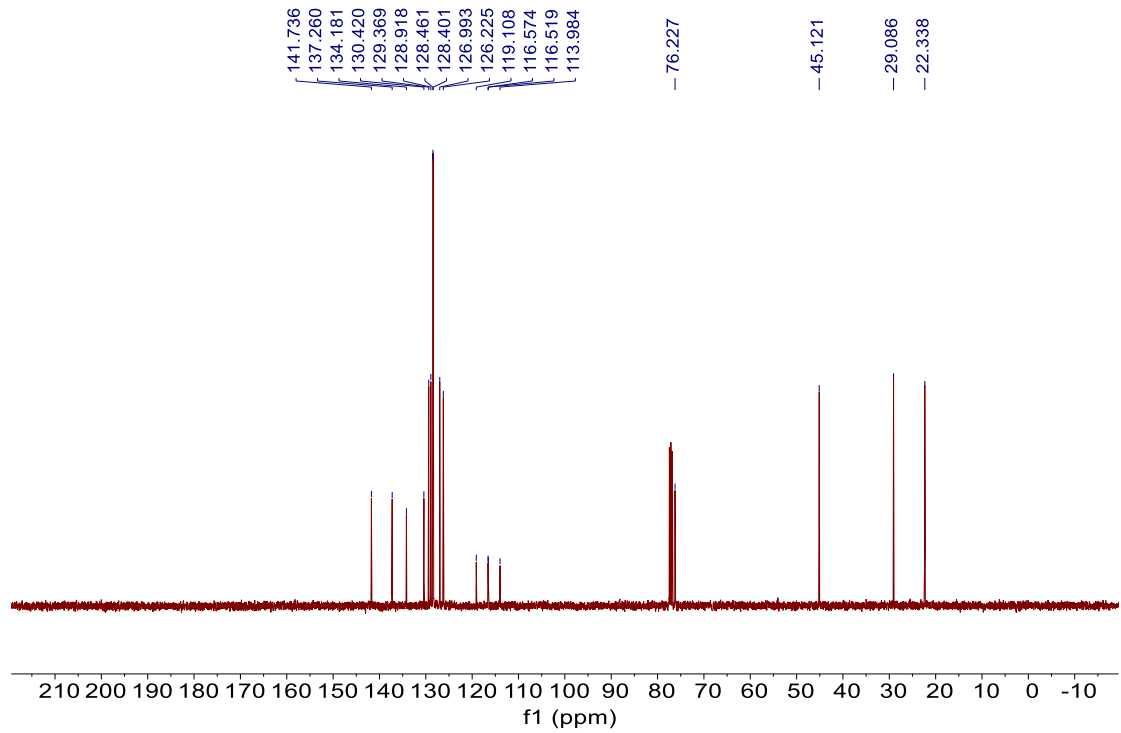

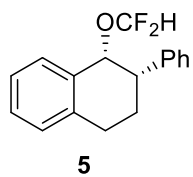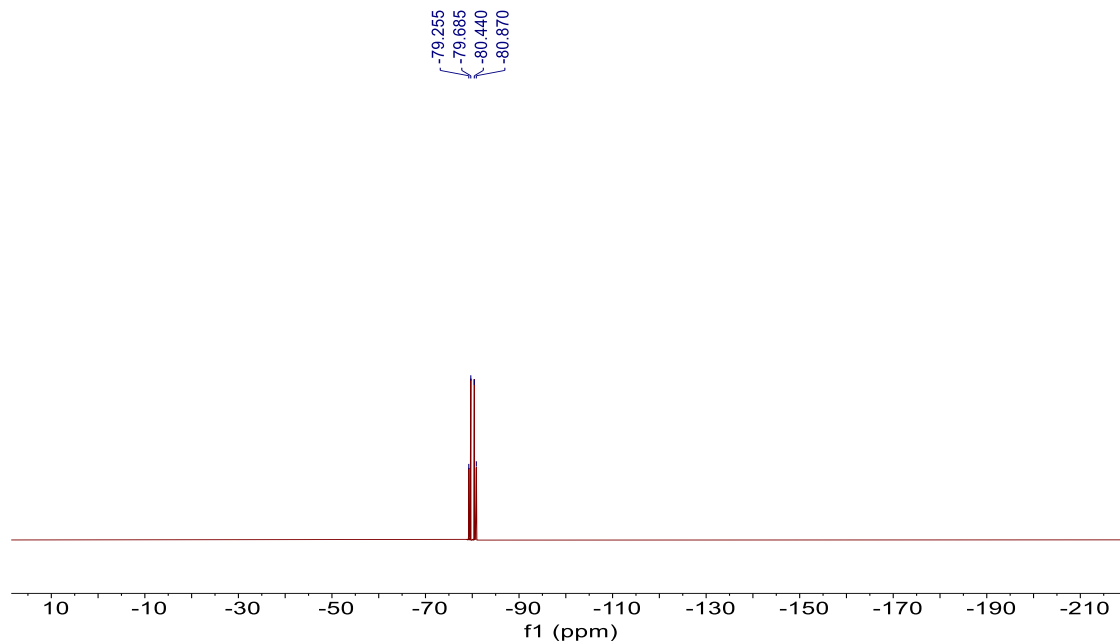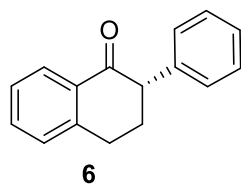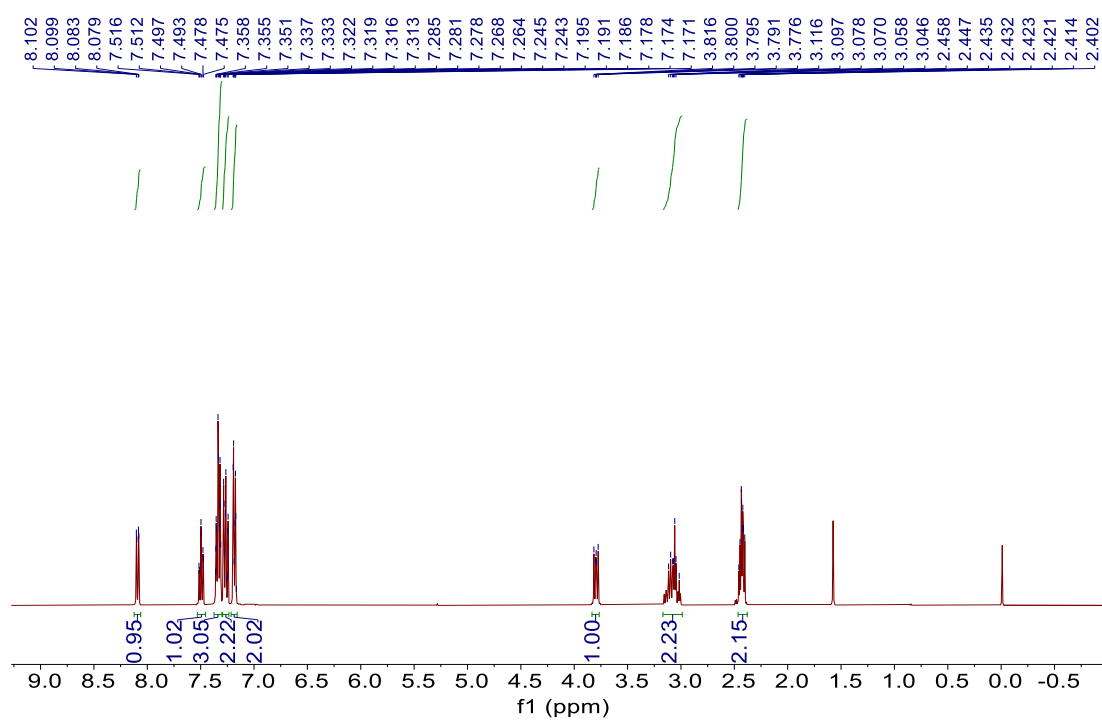

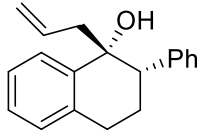

7

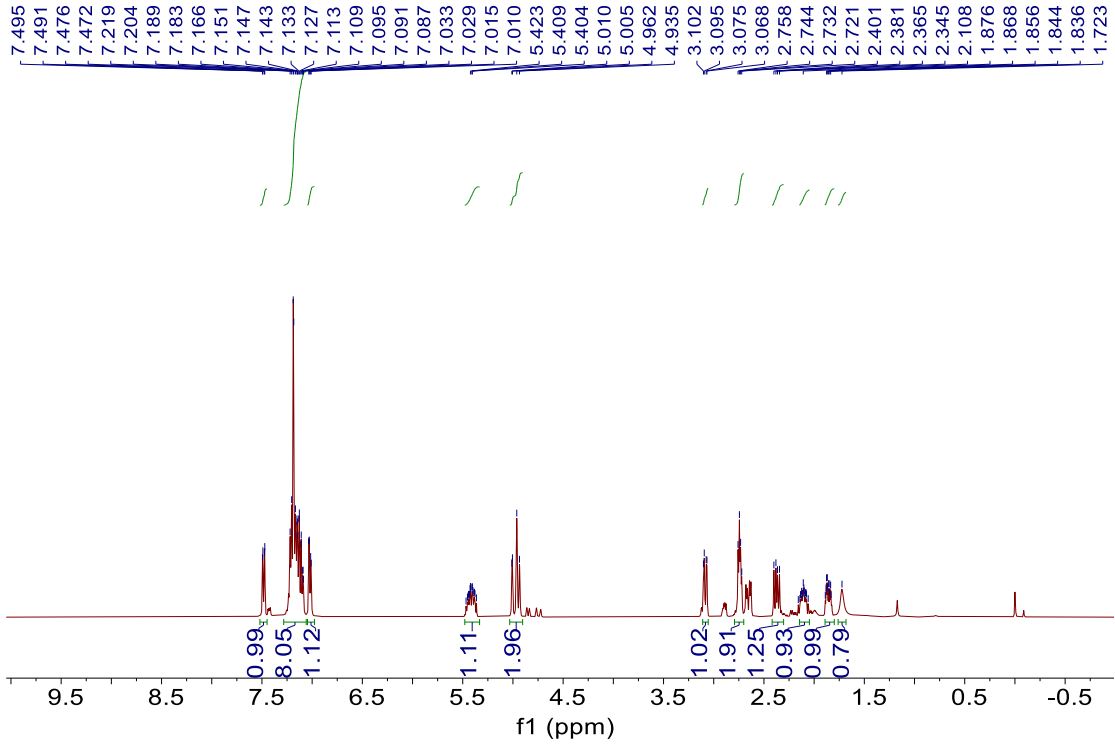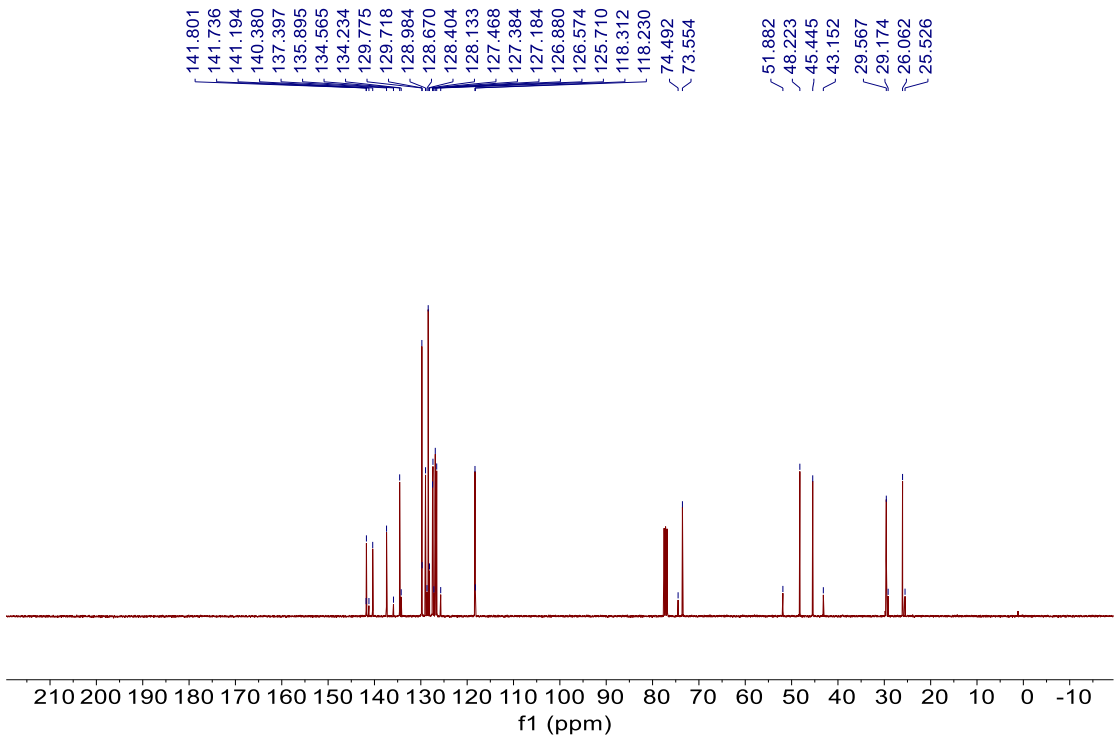

## 8. HPLC Data

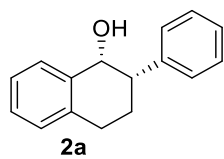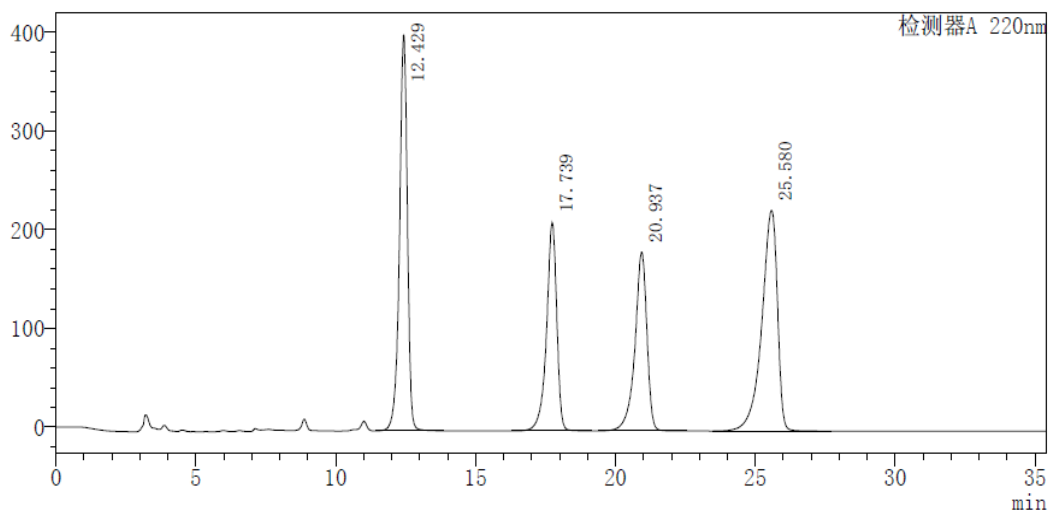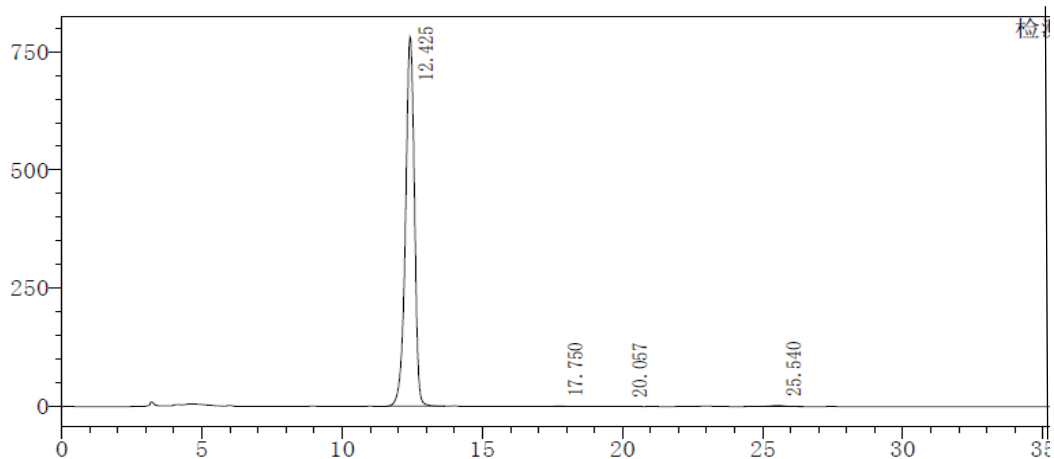

|        | Retention Time(min) | Relative Area (%) | 99.1% ee |
|--------|---------------------|-------------------|----------|
| Peak 1 | 12.425              | 99.426            |          |
| Peak 2 | 17.750              | 0.157             |          |
| Peak 3 | 20.057              | 0.007             |          |
| Peak 4 | 25.540              | 0.410             |          |



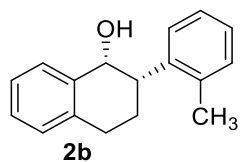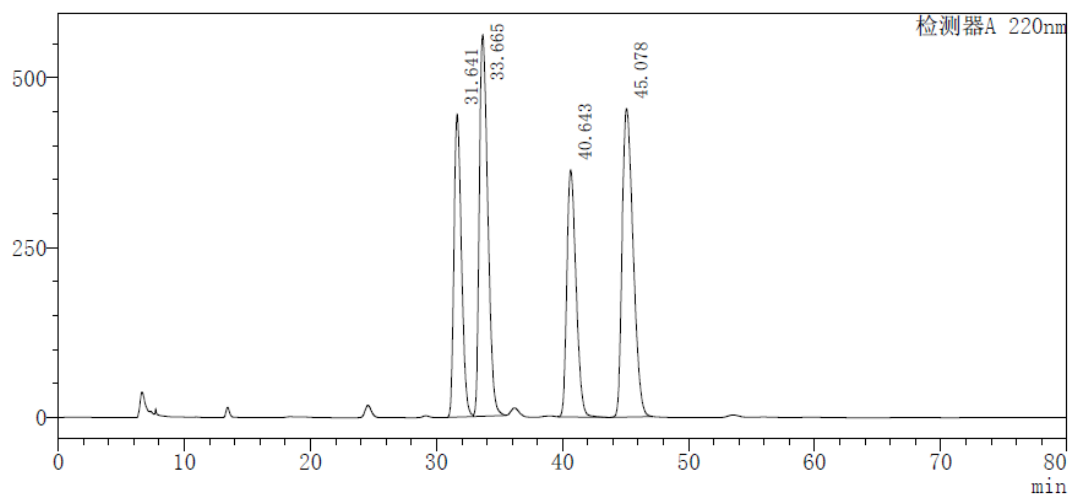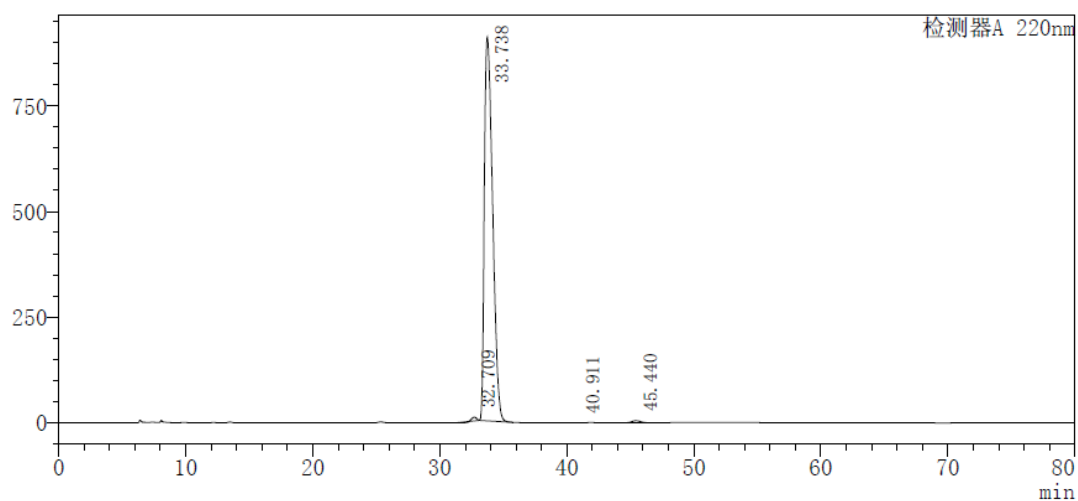

|               | Retention Time(min) | Relative Area (%) | <b>99% ee</b> |
|---------------|---------------------|-------------------|---------------|
| <b>Peak 1</b> | 32.709              | 0.456             |               |
| <b>Peak 2</b> | 33.738              | 98.966            |               |
| <b>Peak 3</b> | 40.911              | 0.014             |               |
| <b>Peak 4</b> | 45.440              | 0.565             |               |

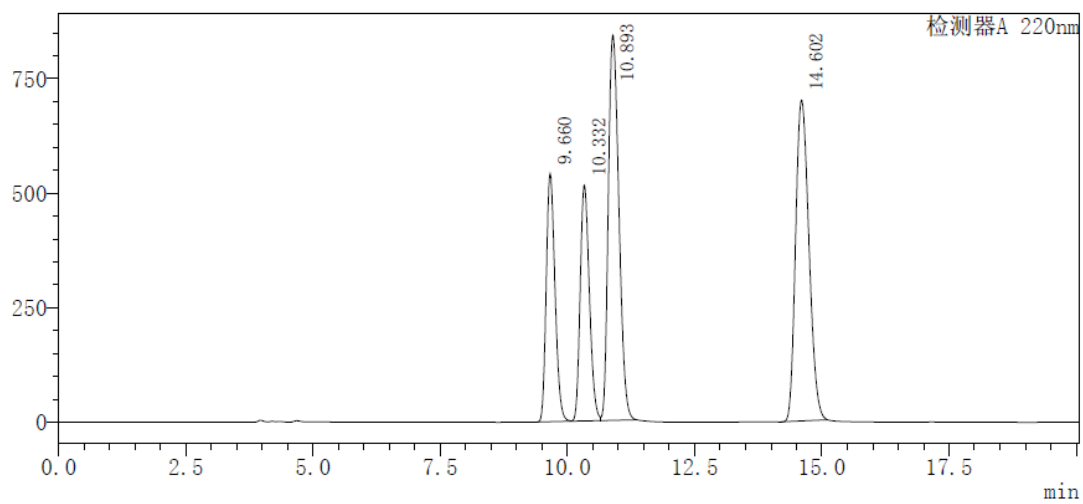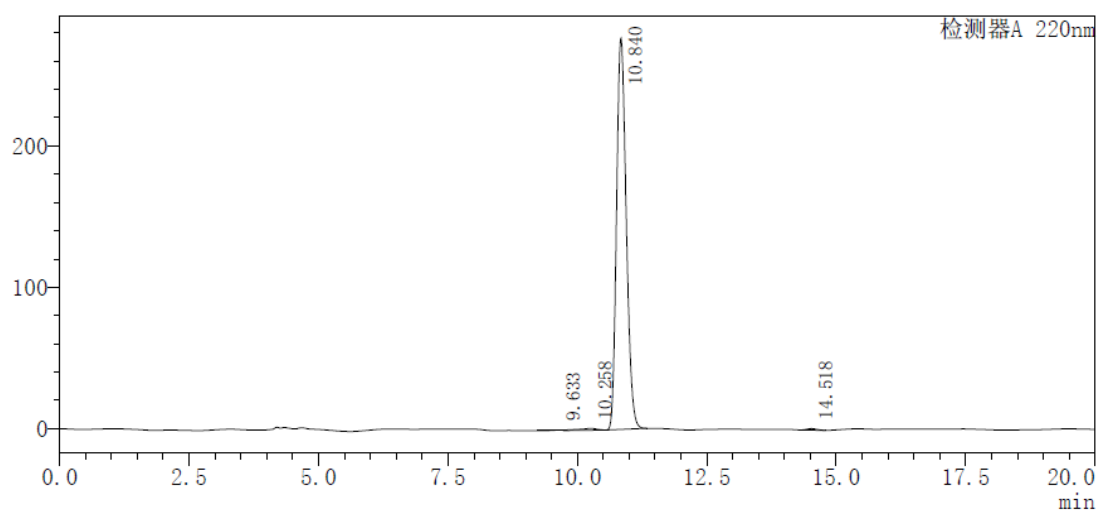

|        | Retention Time(min) | Relative Area (%) | 99.3% ee |
|--------|---------------------|-------------------|----------|
| Peak 1 | 9.633               | 0.142             |          |
| Peak 2 | 10.258              | 0.842             |          |
| Peak 3 | 10.840              | 98.662            |          |
| Peak 4 | 14.518              | 0.354             |          |

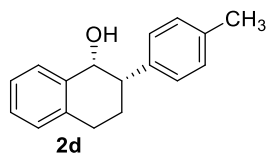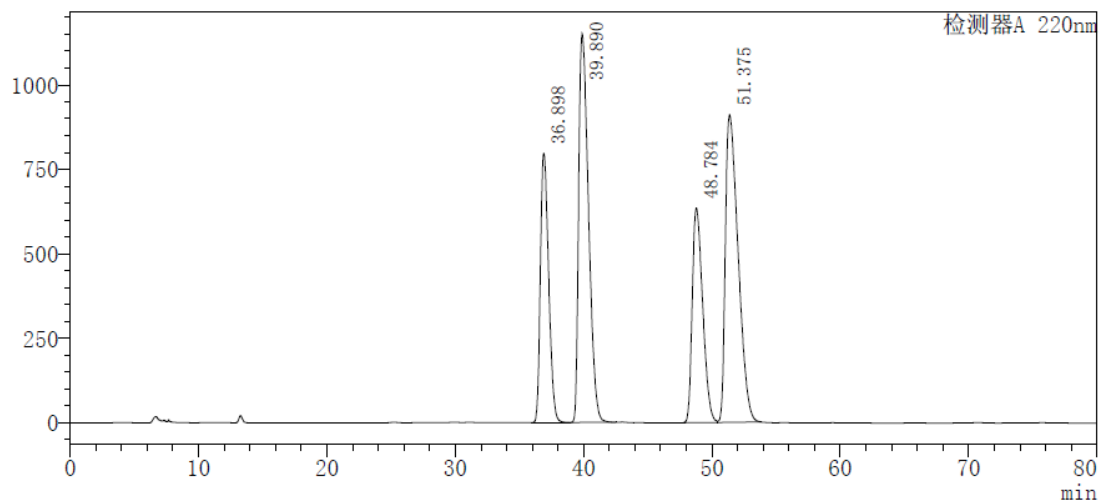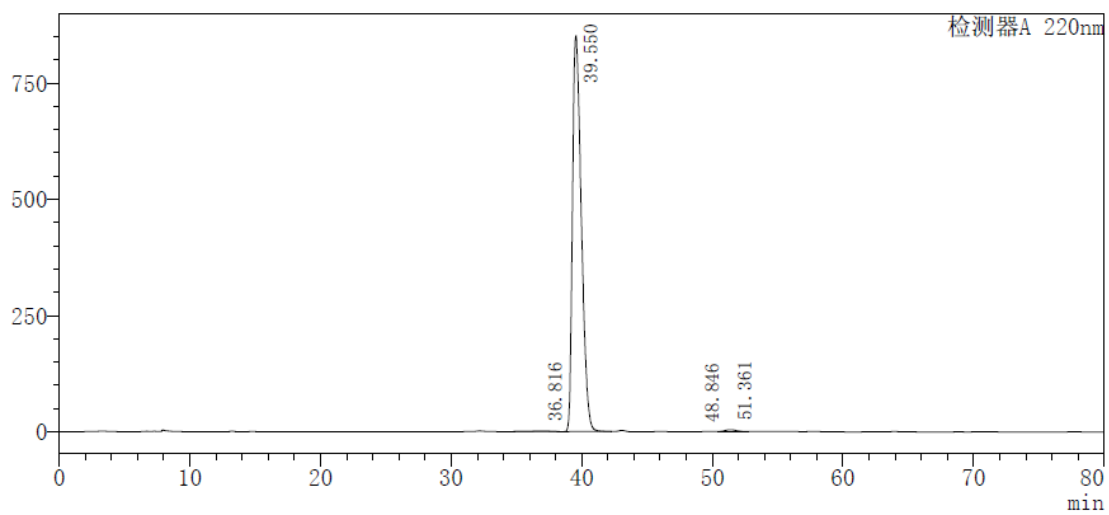

|        | Retention Time(min) | Relative Area (%) | 99% ee |
|--------|---------------------|-------------------|--------|
| Peak 1 | 36.816              | 0.272             |        |
| Peak 2 | 39.550              | 99.264            |        |
| Peak 3 | 48.846              | -0.015            |        |
| Peak 4 | 51.361              | 0.478             |        |

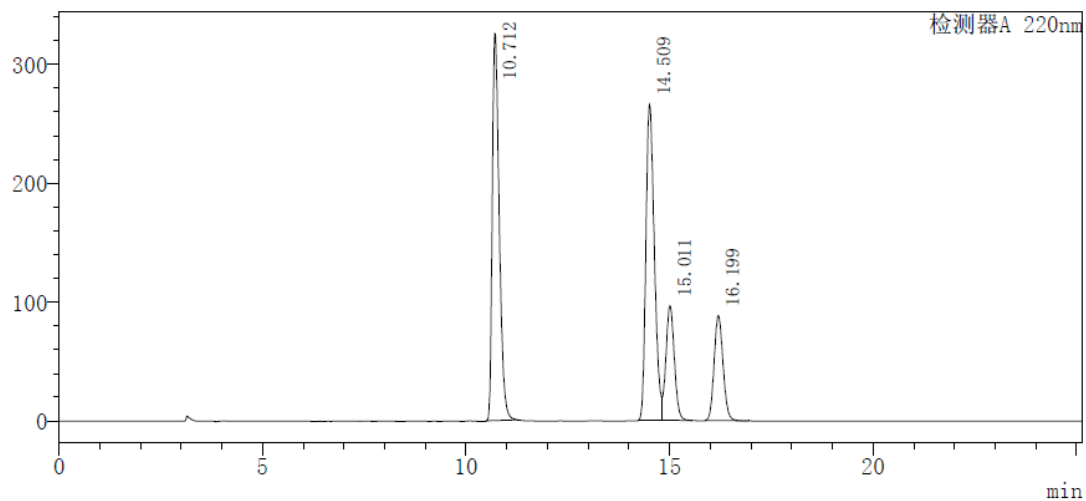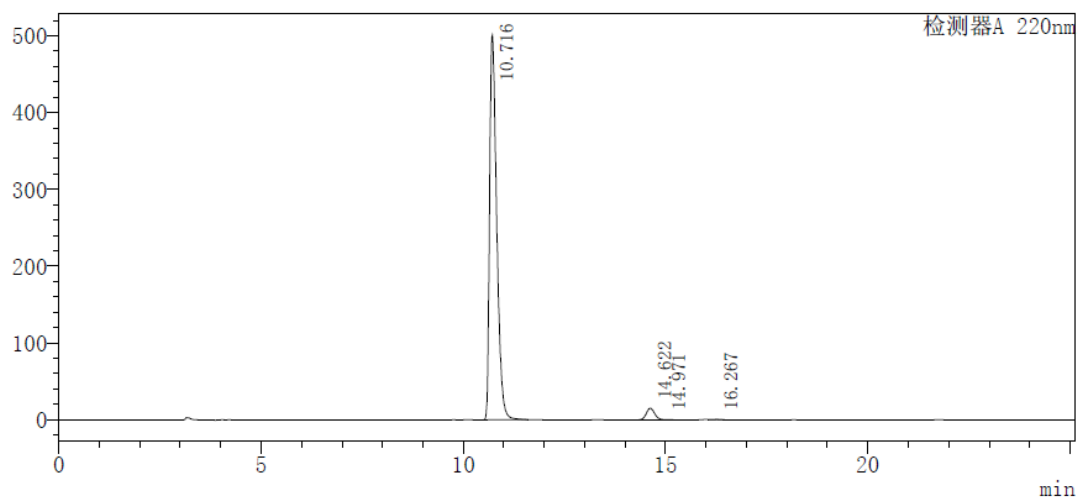

|        | Retention Time(min) | Relative Area (%) | 93% ee |
|--------|---------------------|-------------------|--------|
| Peak 1 | 10.716              | 96.531            |        |
| Peak 2 | 14.622              | 3.402             |        |
| Peak 3 | 14.971              | 0.030             |        |
| Peak 4 | 16.267              | 0.036             |        |

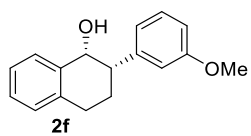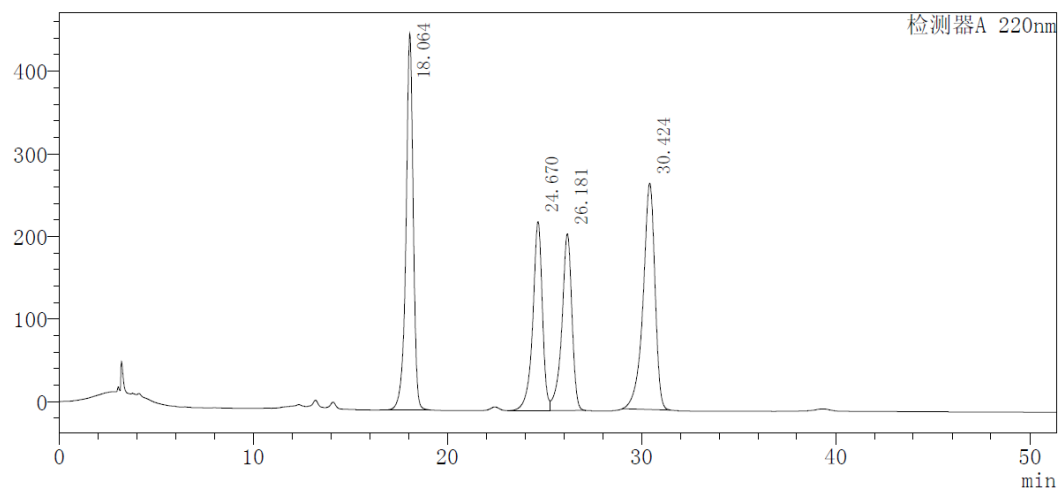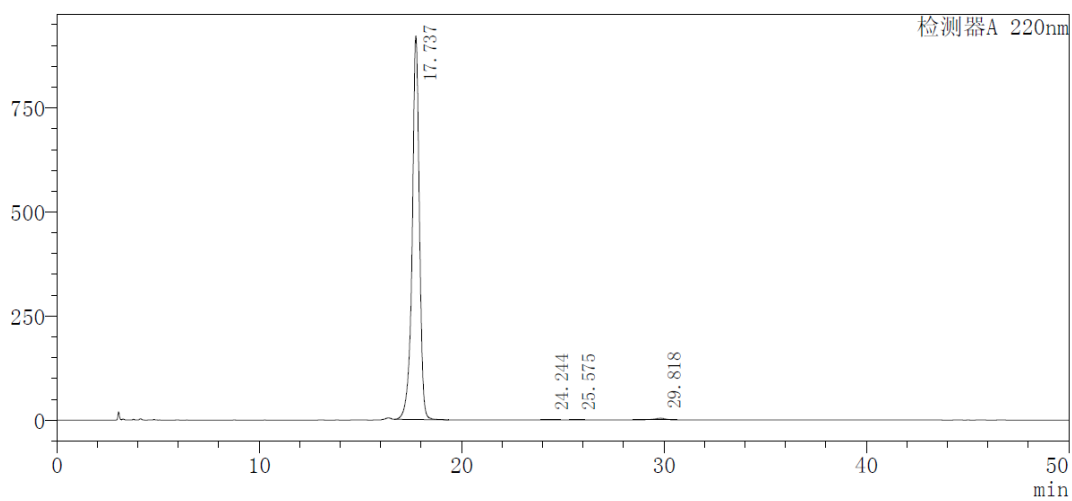

|        | Retention Time(min) | Relative Area (%) | 99% ee |
|--------|---------------------|-------------------|--------|
| Peak 1 | 17.737              | 99.244            |        |
| Peak 2 | 24.244              | 0.082             |        |
| Peak 3 | 25.575              | 0.007             |        |
| Peak 4 | 29.818              | 0.667             |        |

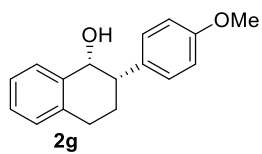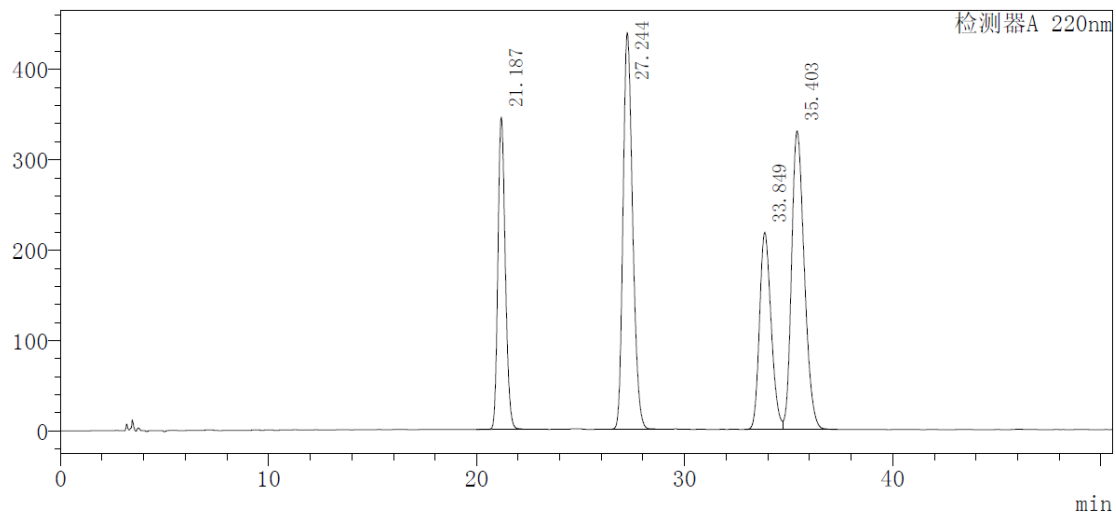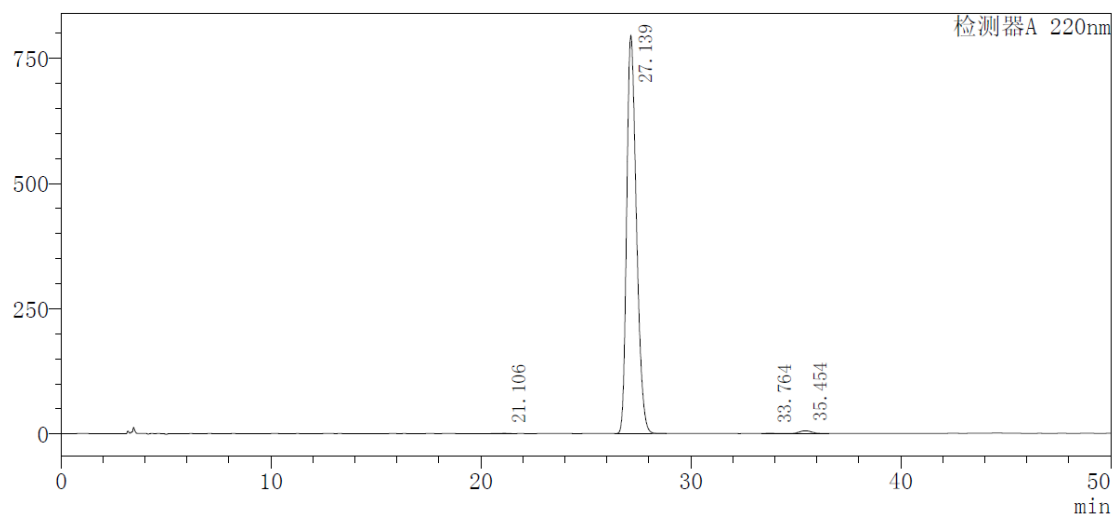

|        | Retention Time(min) | Relative Area (%) | 98% ee |
|--------|---------------------|-------------------|--------|
| Peak 1 | 21.106              | 0.073             |        |
| Peak 2 | 27.139              | 99.020            |        |
| Peak 3 | 33.764              | 0.046             |        |
| Peak 4 | 35.454              | 0.861             |        |

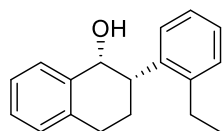

**2h**

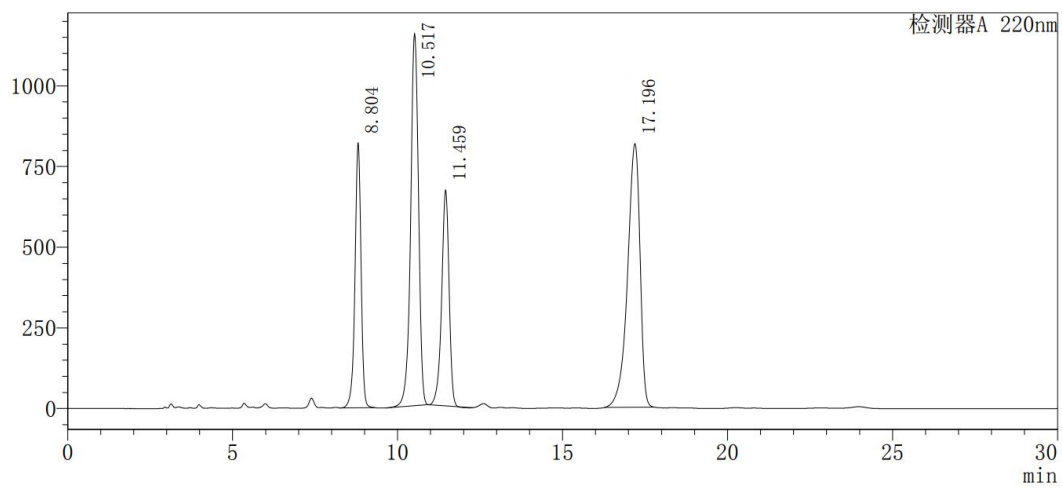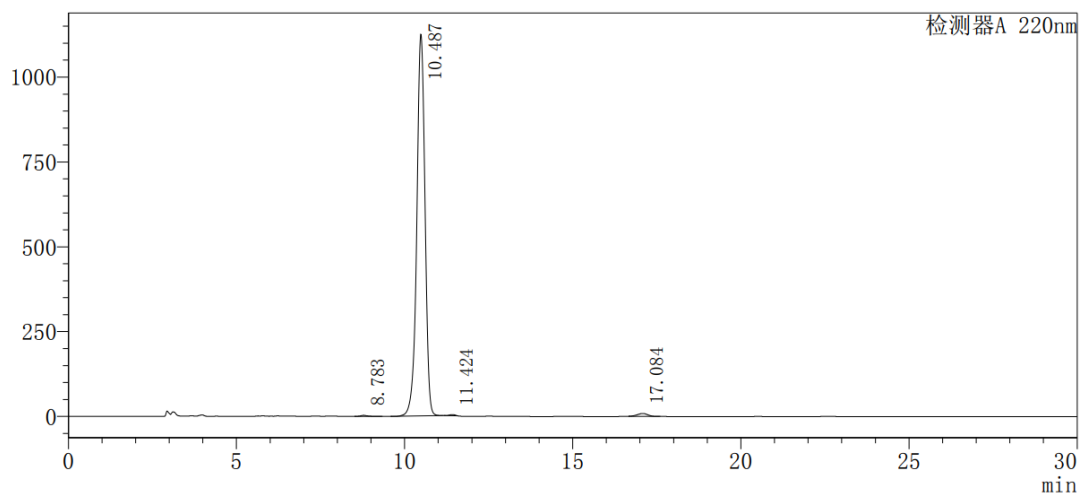

|        | Retention Time(min) | Relative Area (%) | 98% ee |
|--------|---------------------|-------------------|--------|
| Peak 1 | 8.783               | 0.229             |        |
| Peak 2 | 10.487              | 98.625            |        |
| Peak 3 | 11.424              | 0.196             |        |
| Peak 4 | 17.084              | 0.949             |        |

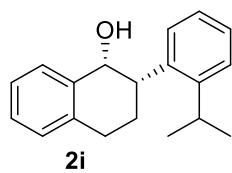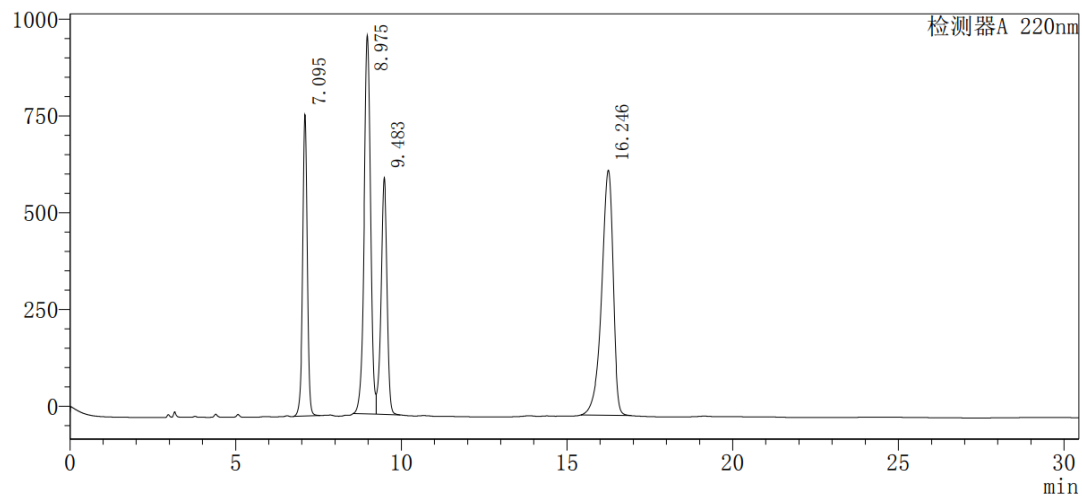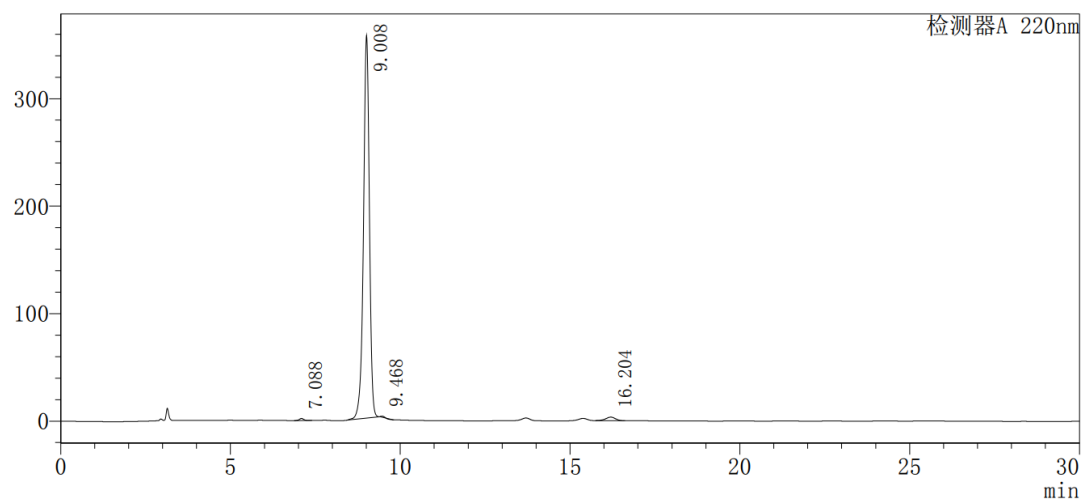

|        | Retention Time(min) | Relative Area (%) | 97% ee |
|--------|---------------------|-------------------|--------|
| Peak 1 | 7.088               | 0.412             |        |
| Peak 2 | 9.008               | 98.078            |        |
| Peak 3 | 9.468               | 0.004             |        |
| Peak 4 | 16.204              | 1.505             |        |



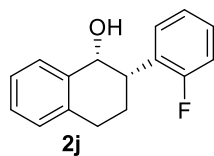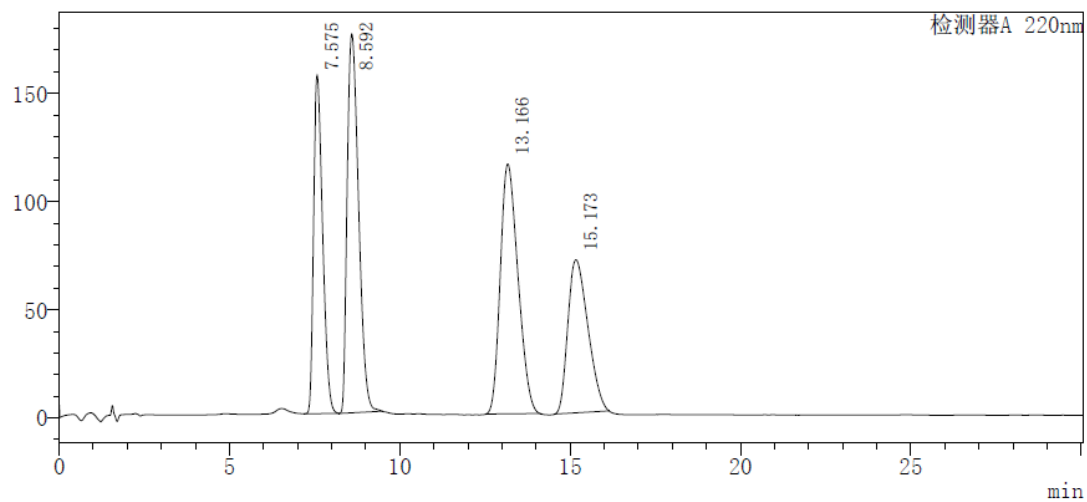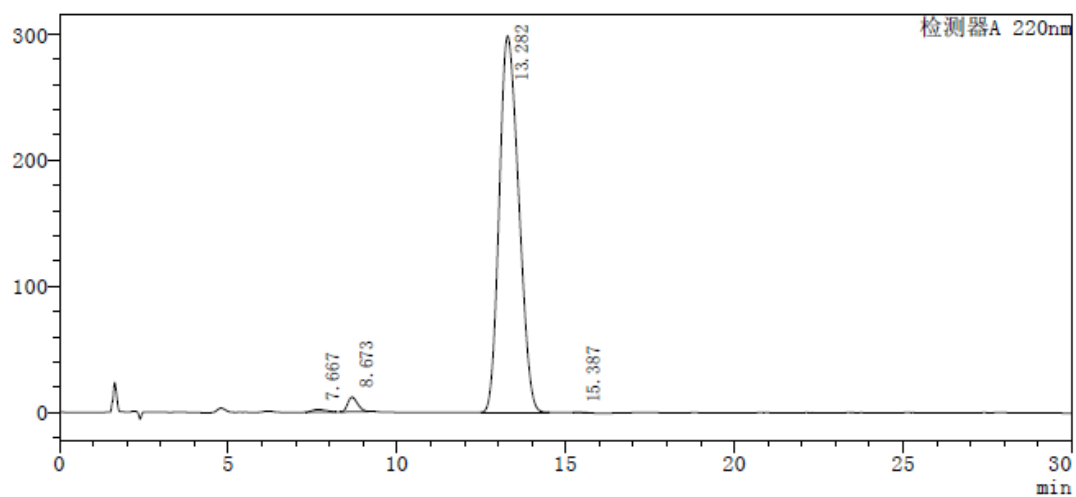

|        | Retention Time(min) | Relative Area (%) | 96% ee |
|--------|---------------------|-------------------|--------|
| Peak 1 | 7.667               | 0.447             |        |
| Peak 2 | 8.673               | 1.894             |        |
| Peak 3 | 13.282              | 97.635            |        |
| Peak 4 | 15.387              | 0.023             |        |

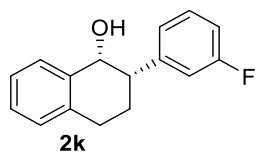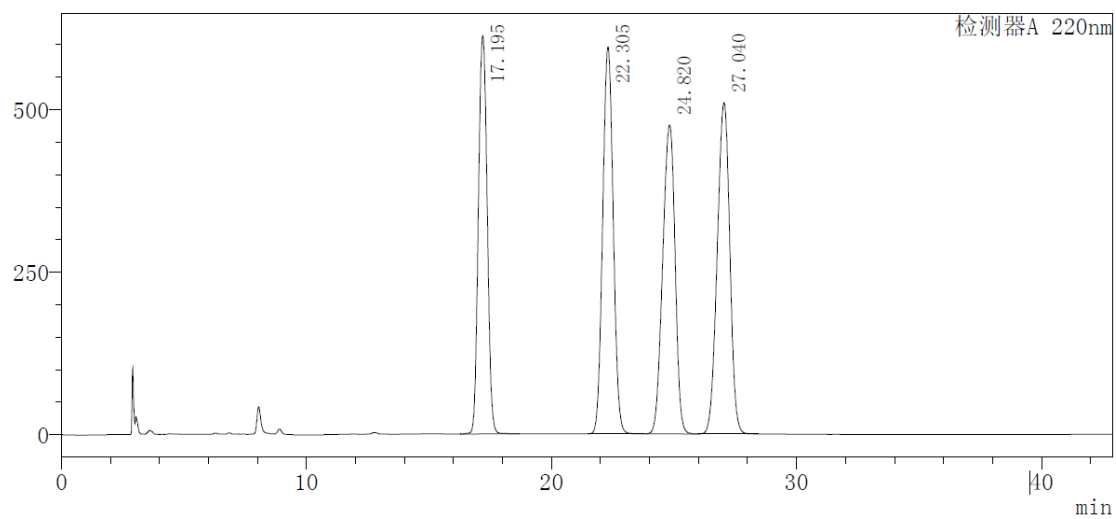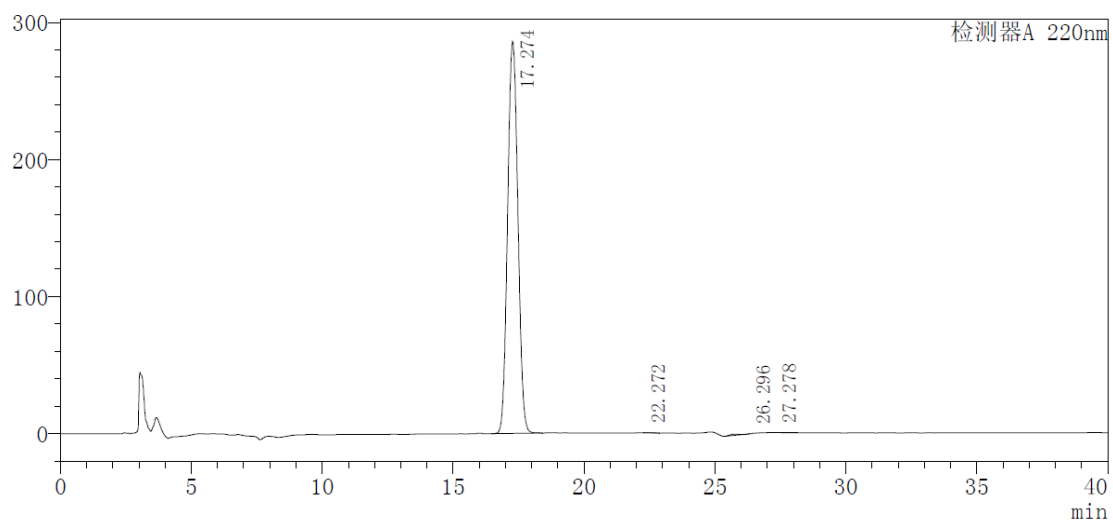

|        | Retention Time(min) | Relative Area (%) | 99.6% ee |
|--------|---------------------|-------------------|----------|
| Peak 1 | 17.274              | 99.718            |          |
| Peak 2 | 22.272              | 0.009             |          |
| Peak 3 | 26.296              | 0.213             |          |
| Peak 4 | 27.278              | 0.060             |          |

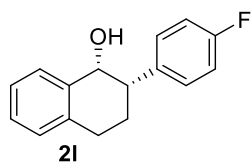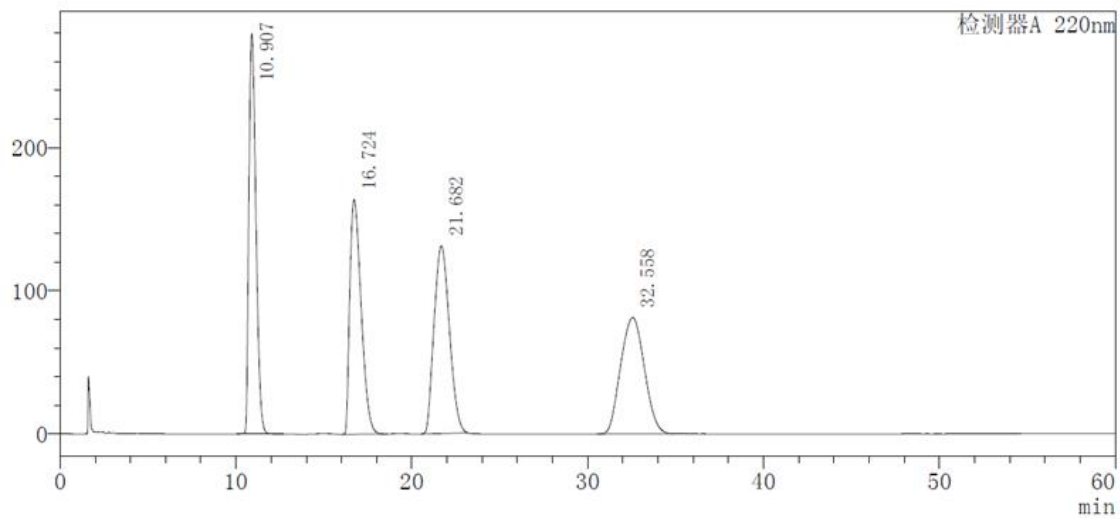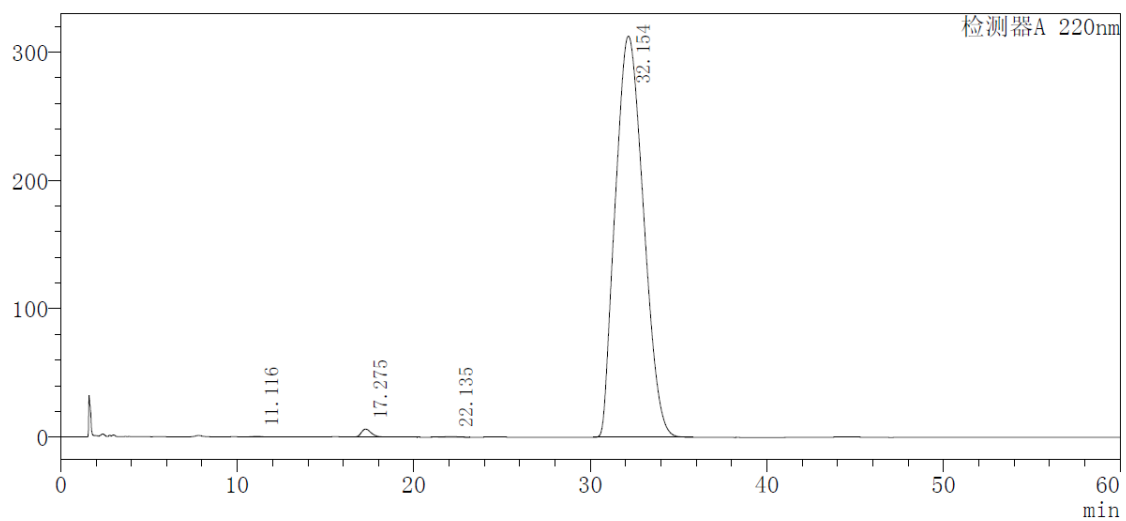

|        | Retention Time(min) | Relative Area (%) | 99% ee |
|--------|---------------------|-------------------|--------|
| Peak 1 | 11.116              | 0.040             |        |
| Peak 2 | 17.275              | 0.685             |        |
| Peak 3 | 22.135              | 0.055             |        |
| Peak 4 | 32.154              | 99.220            |        |

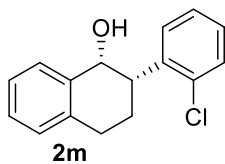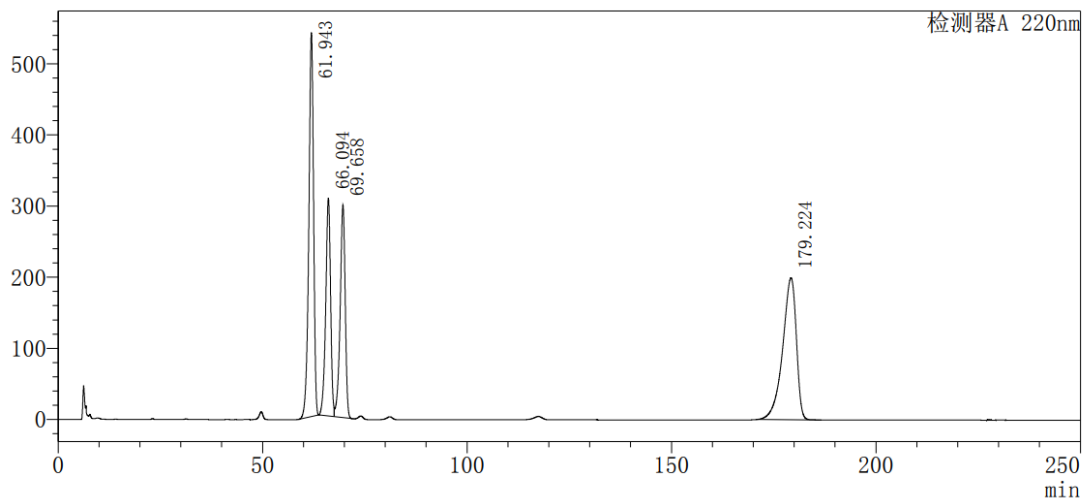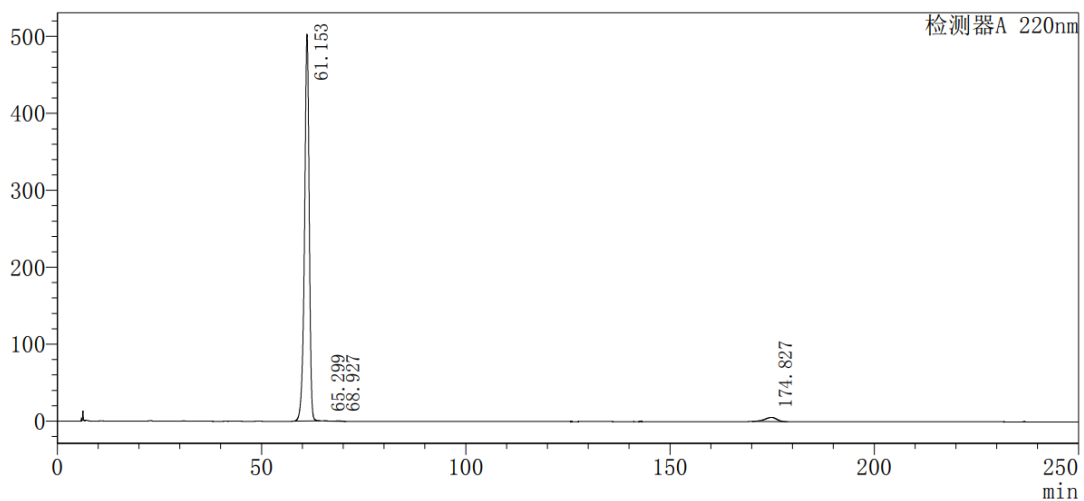

|        | Retention Time(min) | Relative Area (%) | 95% ee |
|--------|---------------------|-------------------|--------|
| Peak 1 | 61.153              | 97.215            |        |
| Peak 2 | 65.299              | 0.003             |        |
| Peak 3 | 68.927              | 0.097             |        |
| Peak 4 | 174.827             | 2.685             |        |

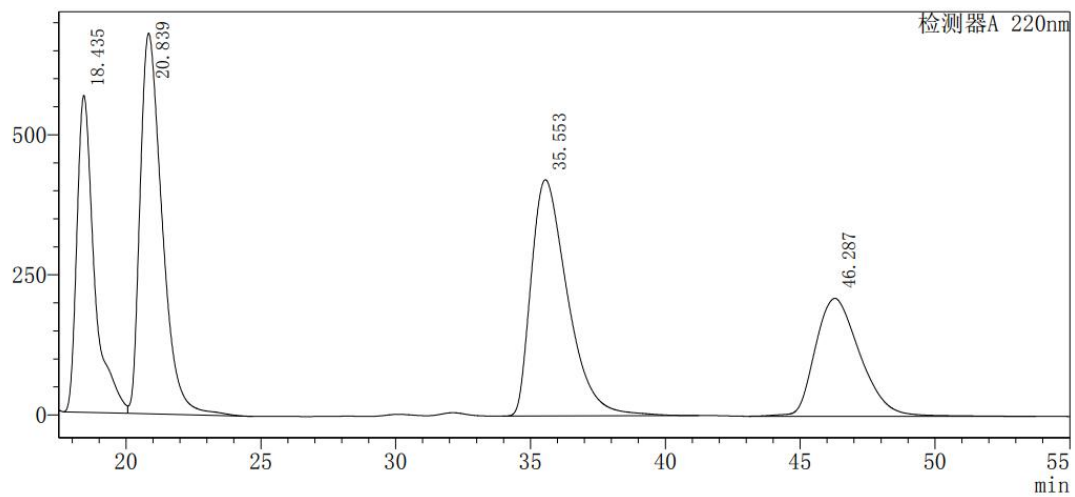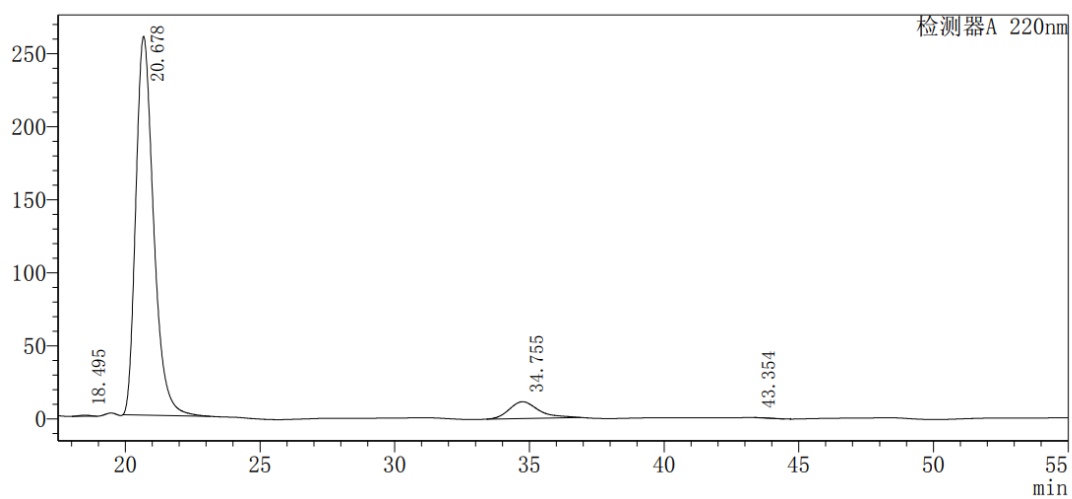

|               | Retention Time(min) | Relative Area (%) | <b>86% ee</b> |
|---------------|---------------------|-------------------|---------------|
| <b>Peak 1</b> | 18.495              | 0.164             |               |
| <b>Peak 2</b> | 20.678              | 92.993            |               |
| <b>Peak 3</b> | 34.755              | 6.820             |               |
| <b>Peak 4</b> | 43.354              | 0.024             |               |

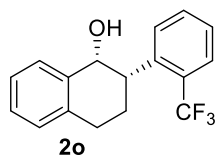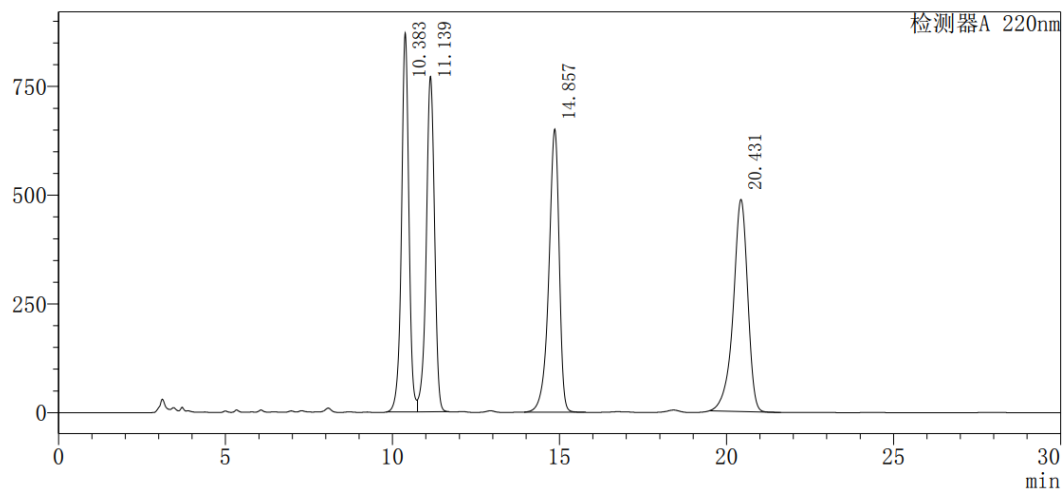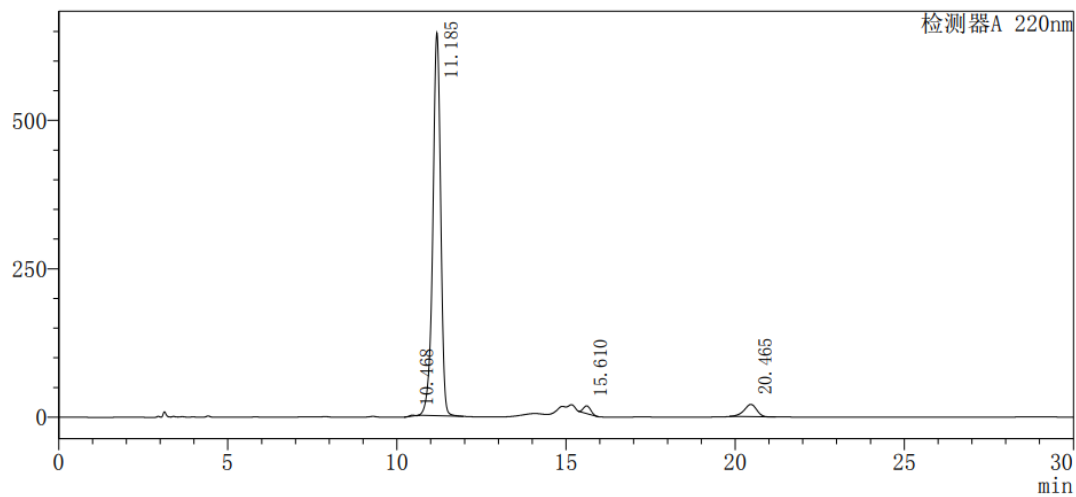

|        | Retention Time(min) | Relative Area (%) | 90% ee |
|--------|---------------------|-------------------|--------|
| Peak 1 | 10.468              | 0.124             |        |
| Peak 2 | 11.185              | 93.323            |        |
| Peak 3 | 15.610              | 1.710             |        |
| Peak 4 | 20.465              | 4.842             |        |

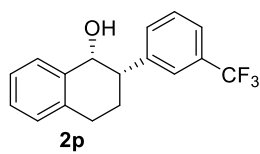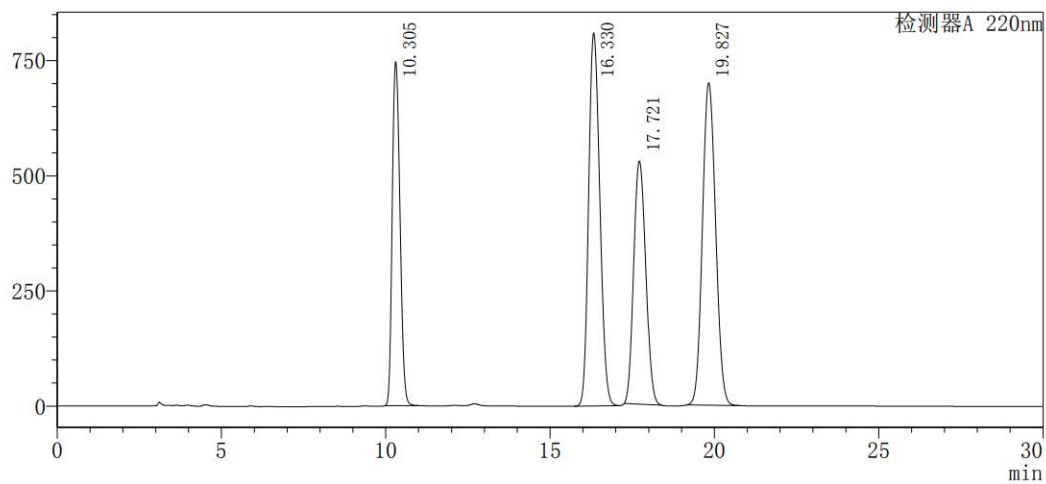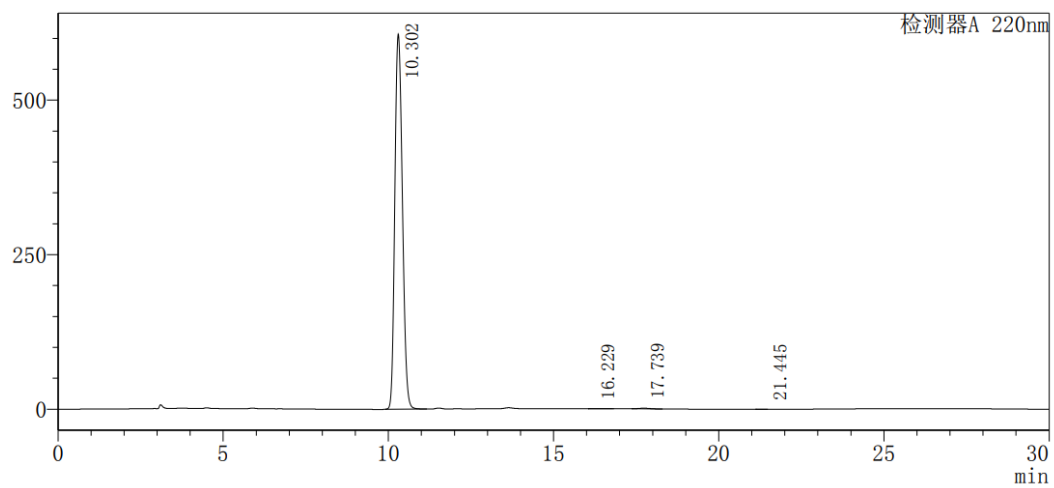

|               | Retention Time(min) | Relative Area (%) | <b>99.5% ee</b> |
|---------------|---------------------|-------------------|-----------------|
| <b>Peak 1</b> | 10.302              | 99.728            |                 |
| <b>Peak 2</b> | 16.229              | 0.014             |                 |
| <b>Peak 3</b> | 17.739              | 0.256             |                 |
| <b>Peak 4</b> | 21.445              | 0.002             |                 |

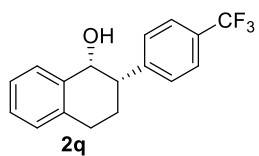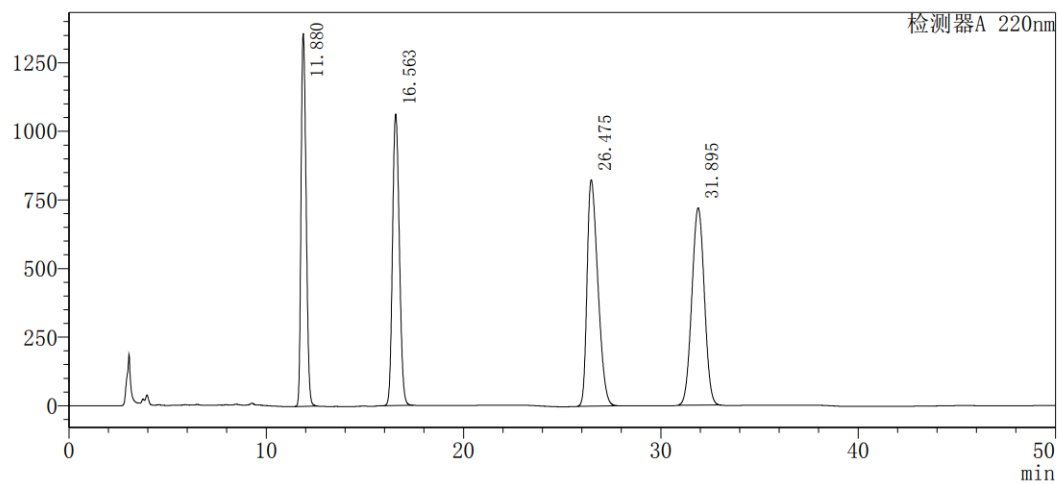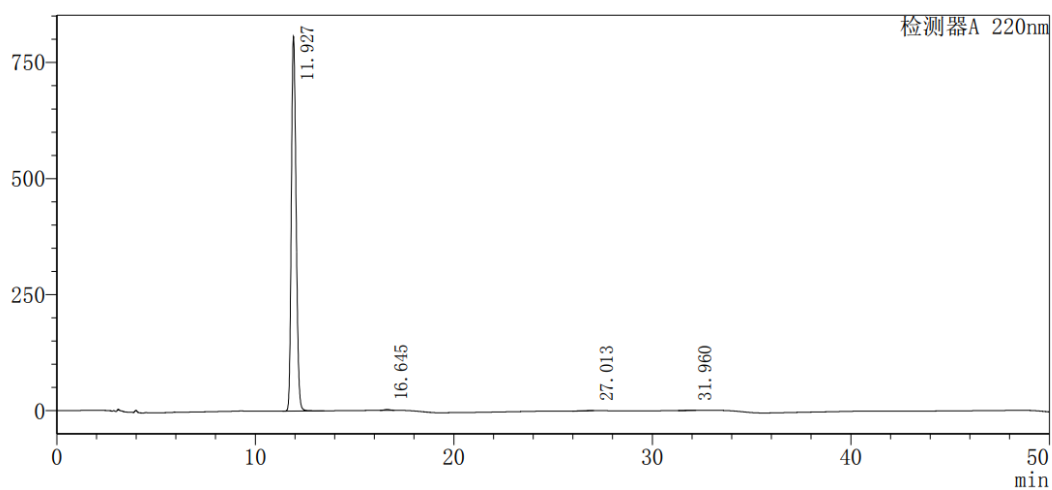

|               | Retention Time(min) | Relative Area (%) | <b>99.5% ee</b> |
|---------------|---------------------|-------------------|-----------------|
| <b>Peak 1</b> | 11.927              | 99.703            |                 |
| <b>Peak 2</b> | 16.645              | 0.260             |                 |
| <b>Peak 3</b> | 27.013              | 0.011             |                 |
| <b>Peak 4</b> | 31.960              | 0.025             |                 |



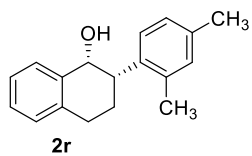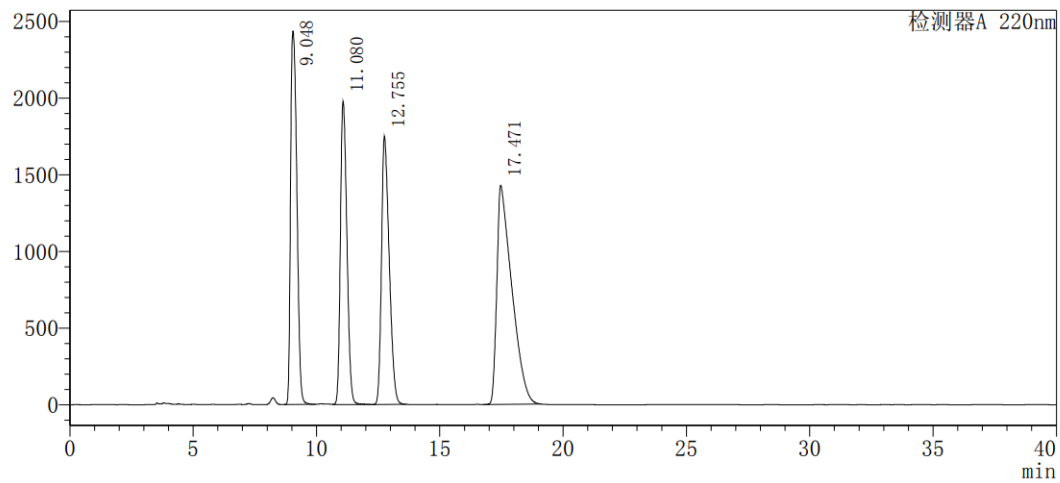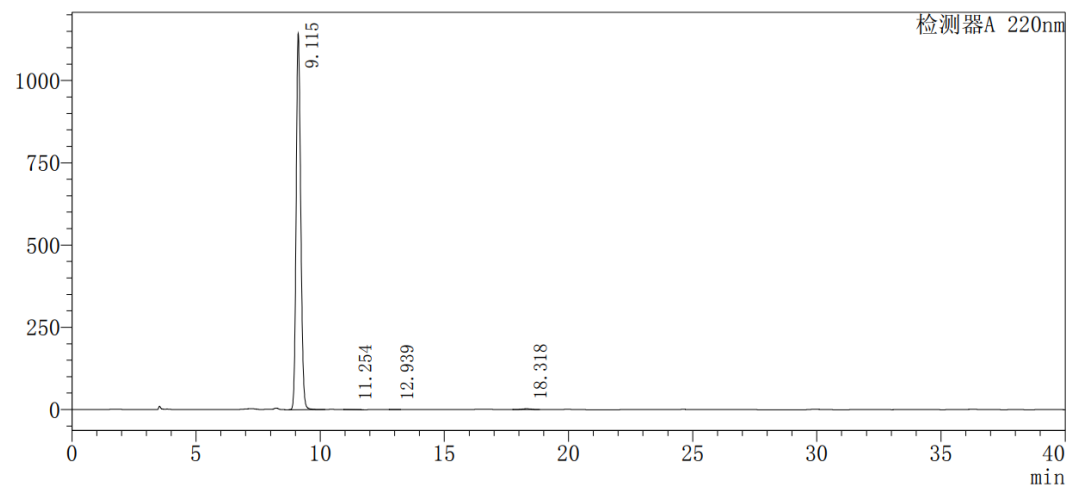

|               | Retention Time(min) | Relative Area (%) | <b>99.1% ee</b> |
|---------------|---------------------|-------------------|-----------------|
| <b>Peak 1</b> | 9.115               | 99.518            |                 |
| <b>Peak 2</b> | 11.254              | 0.020             |                 |
| <b>Peak 3</b> | 12.939              | 0.022             |                 |
| <b>Peak 4</b> | 18.318              | 0.440             |                 |

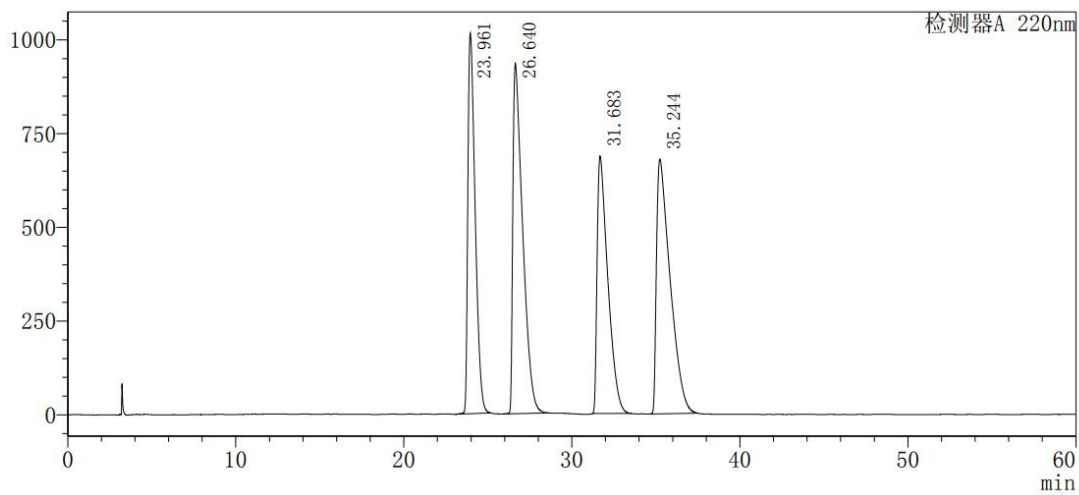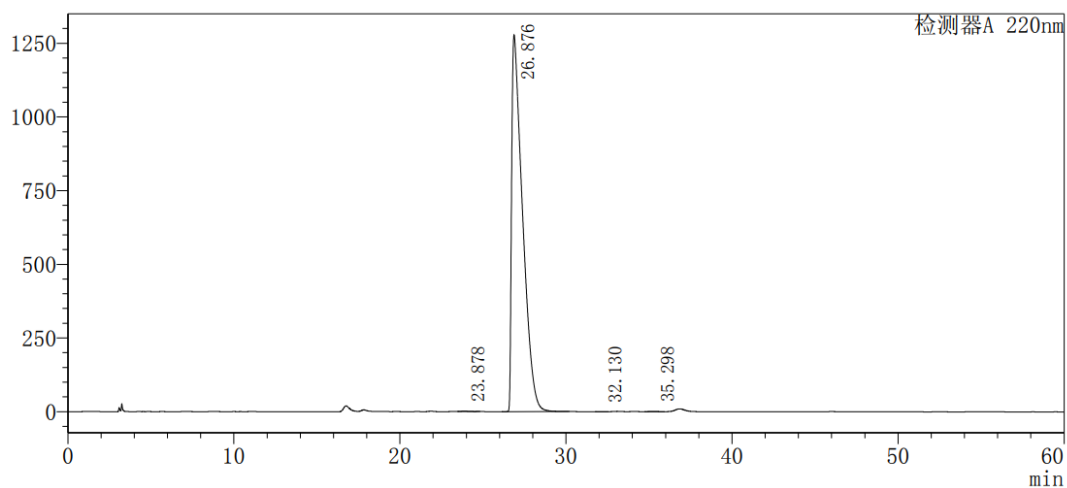

|               | Retention Time(min) | Relative Area (%) | <b>&gt;99.9% ee</b> |
|---------------|---------------------|-------------------|---------------------|
| <b>Peak 1</b> | 23.878              | 0.051             |                     |
| <b>Peak 2</b> | 26.876              | 99.910            |                     |
| <b>Peak 3</b> | 32.130              | 0.007             |                     |
| <b>Peak 4</b> | 35.298              | 0.032             |                     |

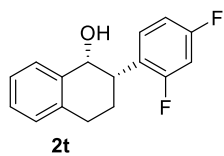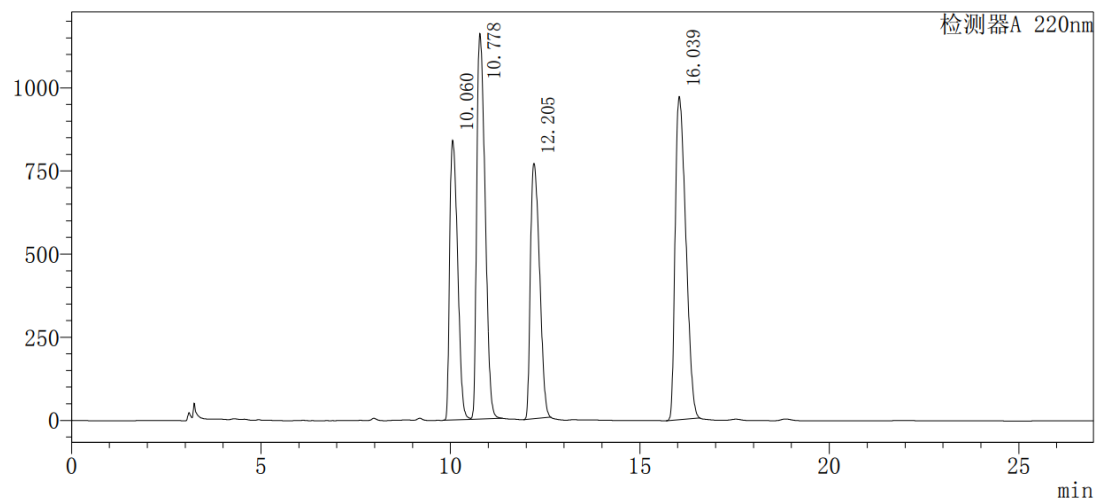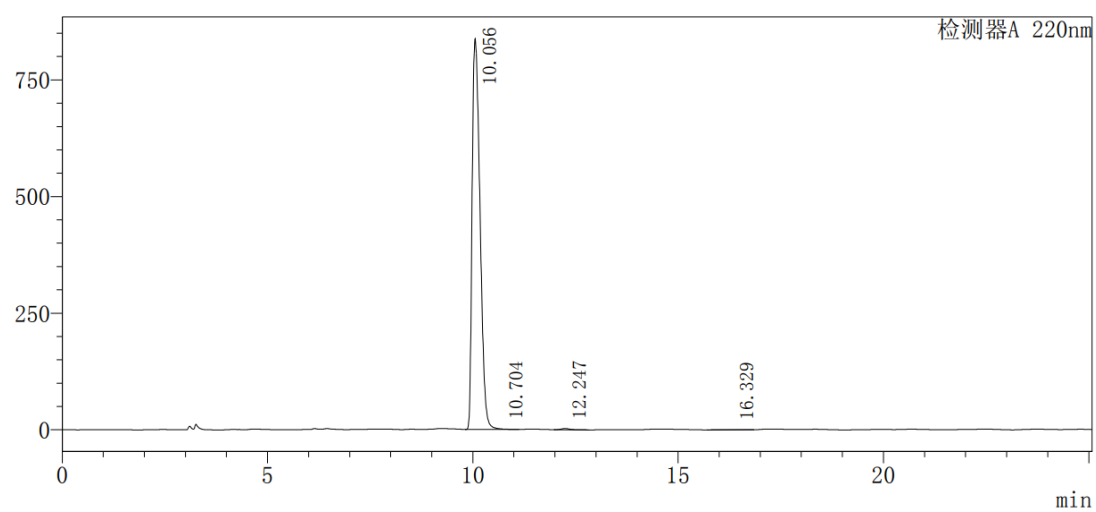

|               | Retention Time(min) | Relative Area (%) | <b>99.4% ee</b> |
|---------------|---------------------|-------------------|-----------------|
| <b>Peak 1</b> | 10.056              | 99.395            |                 |
| <b>Peak 2</b> | 10.704              | 0.091             |                 |
| <b>Peak 3</b> | 12.247              | 0.337             |                 |
| <b>Peak 4</b> | 16.329              | 0.177             |                 |

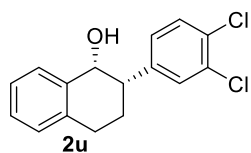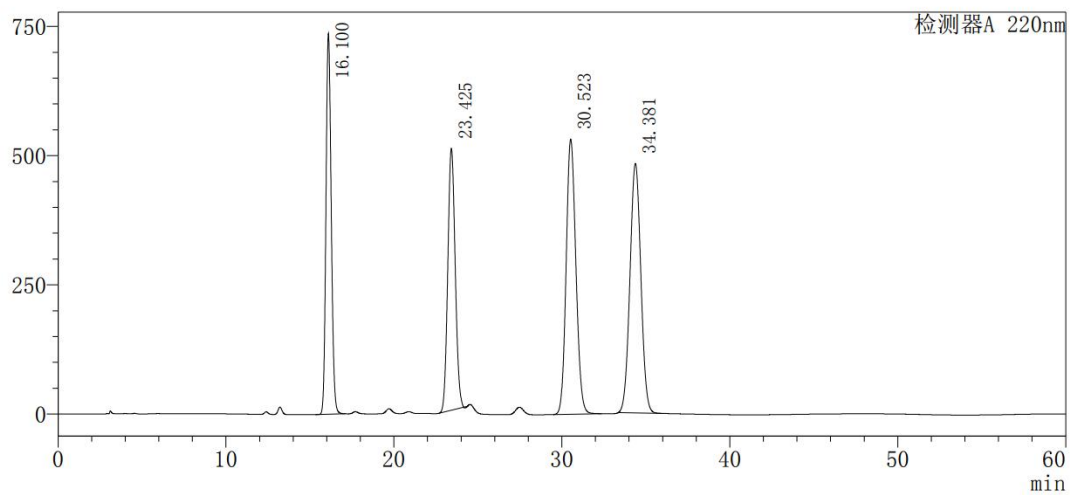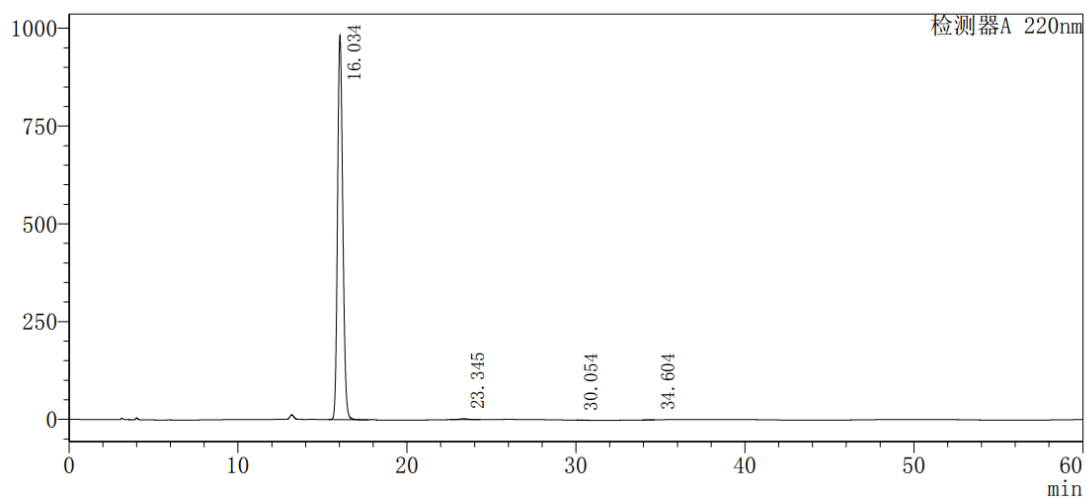

|        | Retention Time(min) | Relative Area (%) | 99.3% ee |
|--------|---------------------|-------------------|----------|
| Peak 1 | 16.034              | 99.656            |          |
| Peak 2 | 23.345              | 0.334             |          |
| Peak 3 | 30.054              | 0.003             |          |
| Peak 4 | 34.604              | 0.007             |          |

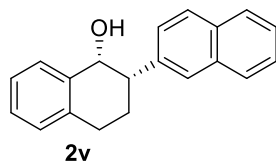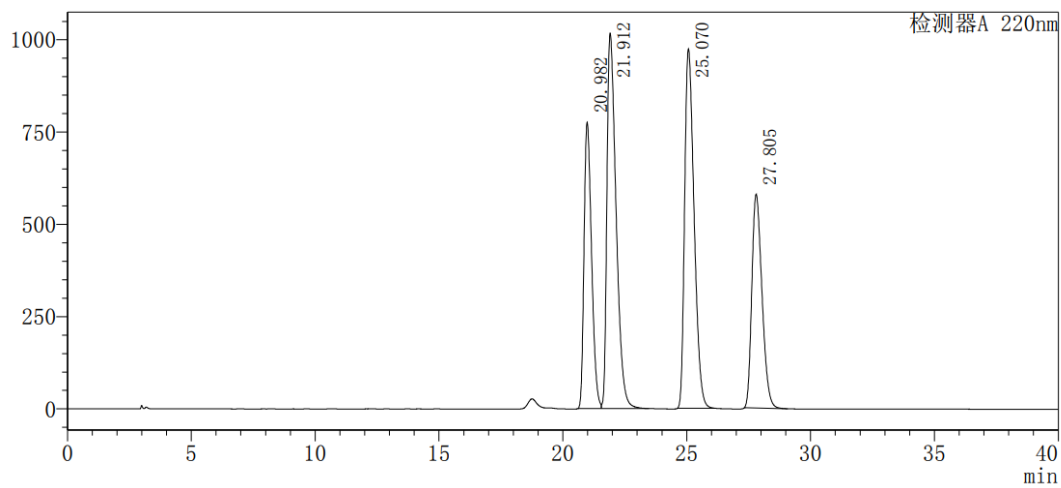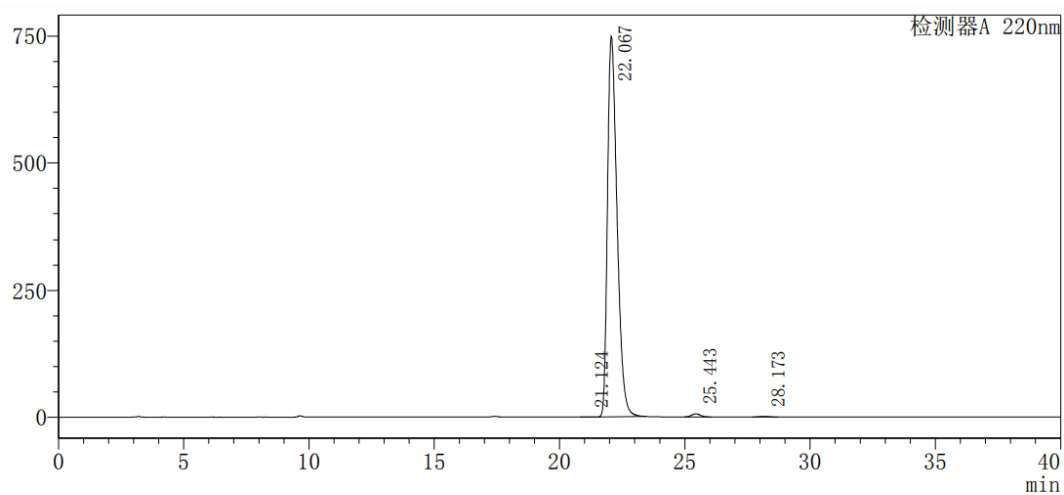

|               | Retention Time(min) | Relative Area (%) | <b>99% ee</b> |
|---------------|---------------------|-------------------|---------------|
| <b>Peak 1</b> | 21.124              | 0.029             |               |
| <b>Peak 2</b> | 22.067              | 99.043            |               |
| <b>Peak 3</b> | 25.443              | 0.758             |               |
| <b>Peak 4</b> | 28.173              | 0.170             |               |

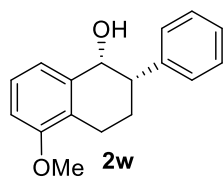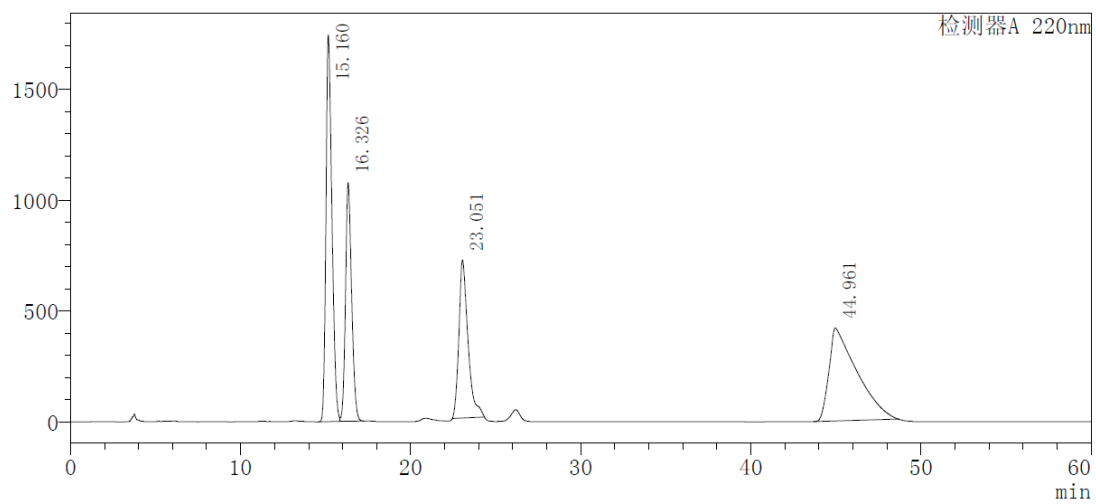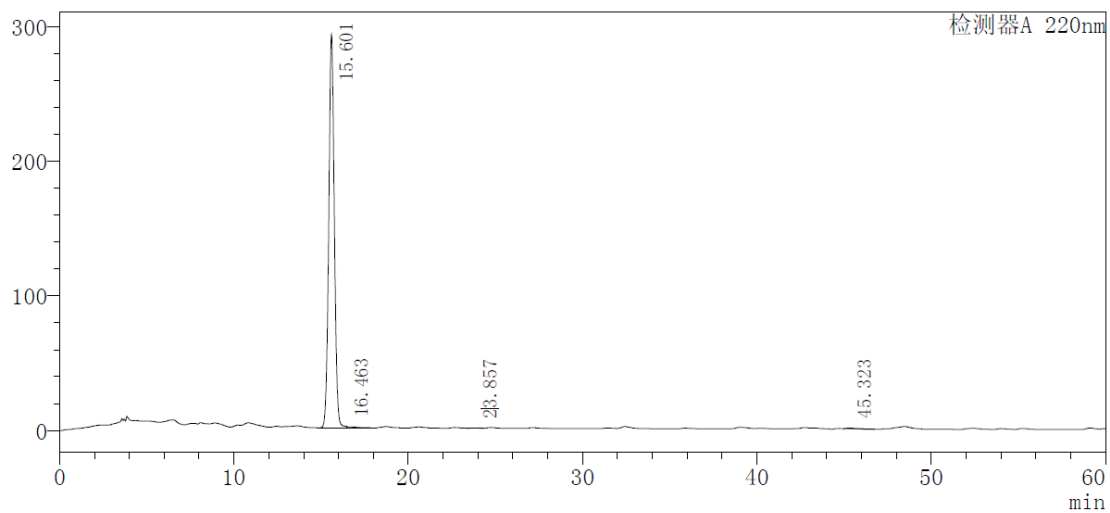

|               | Retention Time(min) | Relative Area (%) | <b>99.5% ee</b> |
|---------------|---------------------|-------------------|-----------------|
| <b>Peak 1</b> | 15.601              | 99.195            |                 |
| <b>Peak 2</b> | 16.463              | 0.523             |                 |
| <b>Peak 3</b> | 23.857              | 0.054             |                 |
| <b>Peak 4</b> | 45.323              | 0.228             |                 |

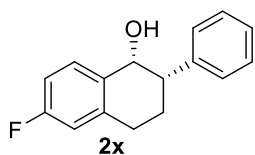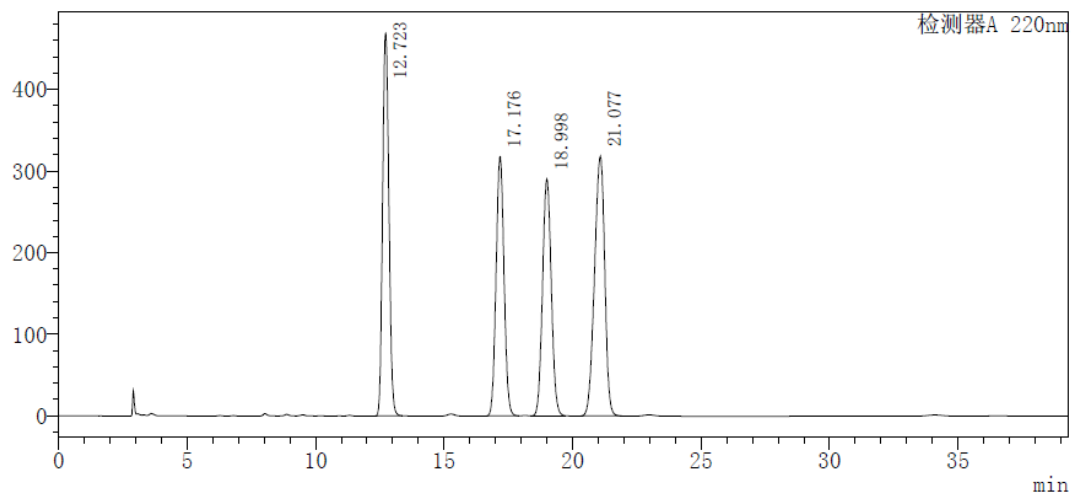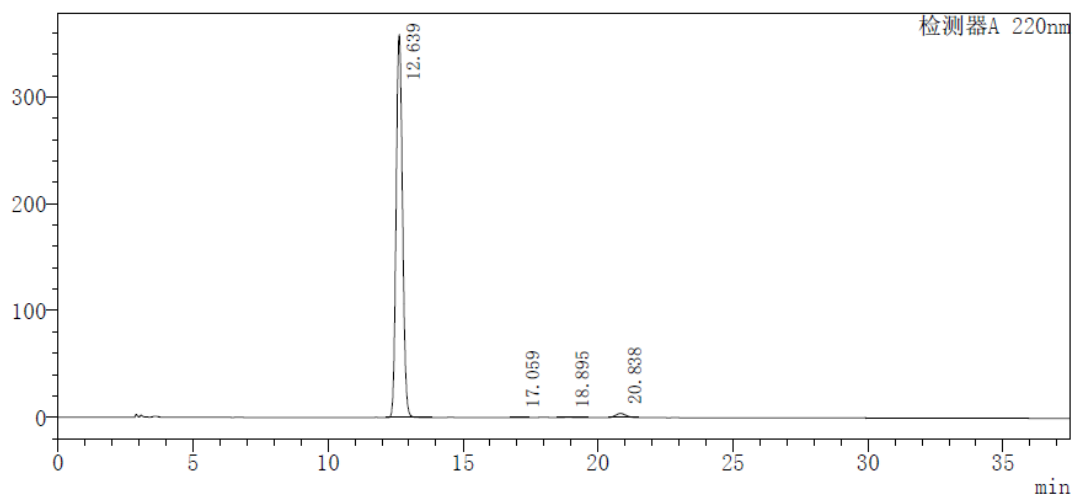

|        | Retention Time(min) | Relative Area (%) | 97% ee |
|--------|---------------------|-------------------|--------|
| Peak 1 | 12.639              | 98.182            |        |
| Peak 2 | 17.059              | 0.031             |        |
| Peak 3 | 18.895              | 0.146             |        |
| Peak 4 | 20.838              | 1.640             |        |

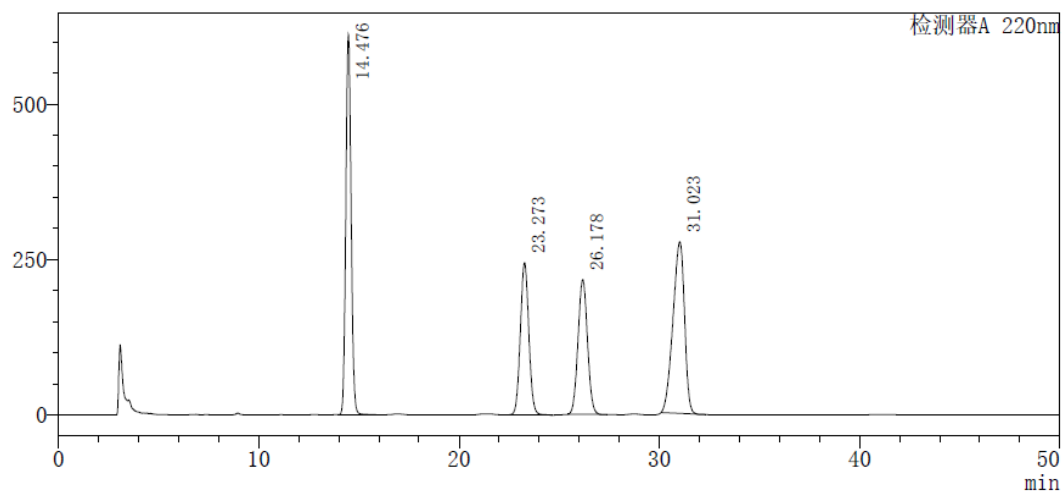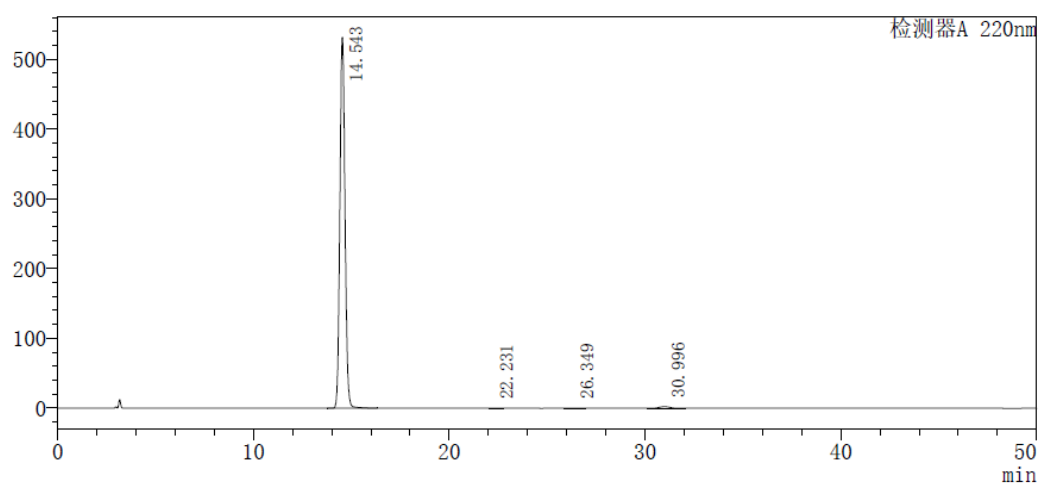

|               | Retention Time(min) | Relative Area (%) | <b>98% ee</b> |
|---------------|---------------------|-------------------|---------------|
| <b>Peak 1</b> | 14.543              | 98.839            |               |
| <b>Peak 2</b> | 22.231              | 0.023             |               |
| <b>Peak 3</b> | 26.349              | 0.139             |               |
| <b>Peak 4</b> | 30.996              | 0.999             |               |



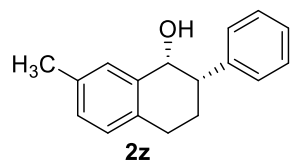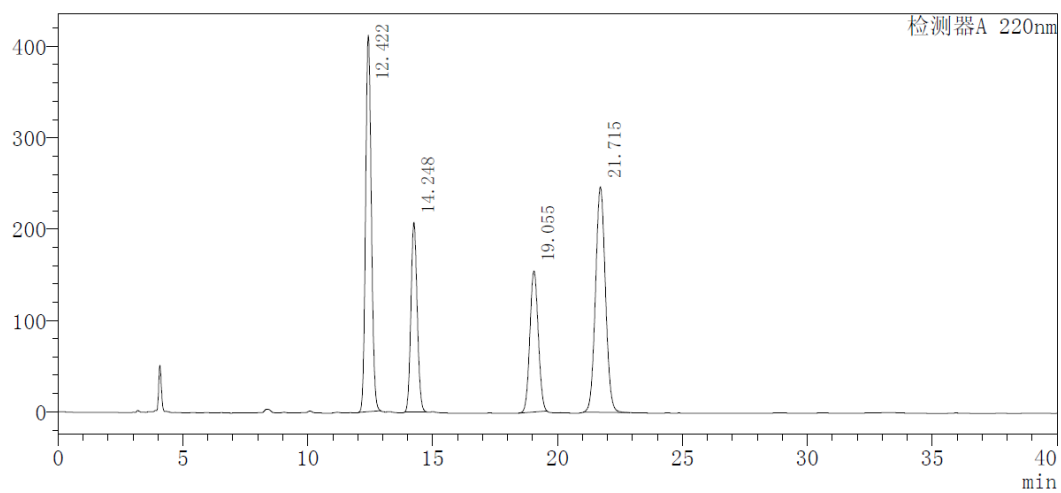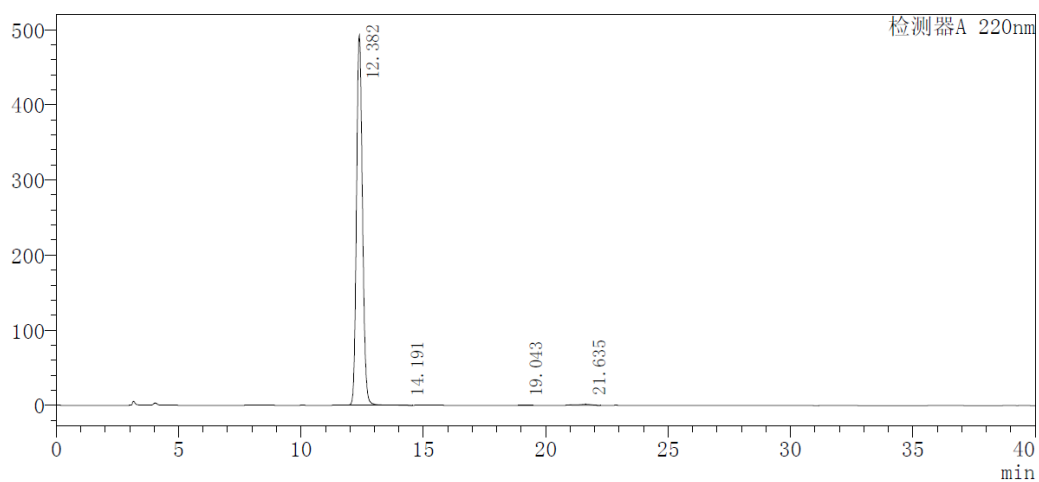

|        | Retention Time(min) | Relative Area (%) | 99% ee |
|--------|---------------------|-------------------|--------|
| Peak 1 | 12.382              | 99.448            |        |
| Peak 2 | 14.191              | 0.038             |        |
| Peak 3 | 19.043              | 0.009             |        |
| Peak 4 | 21.635              | 0.505             |        |

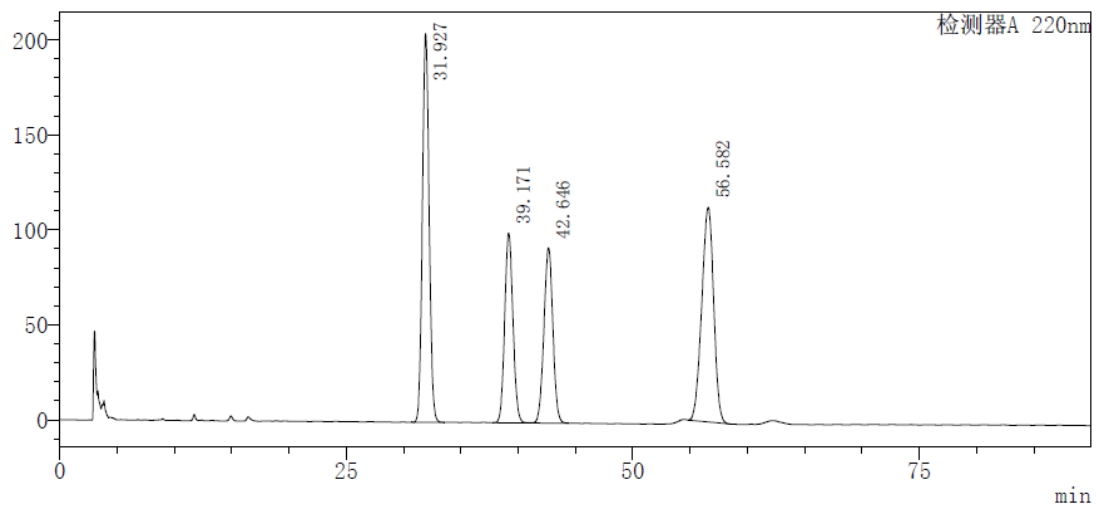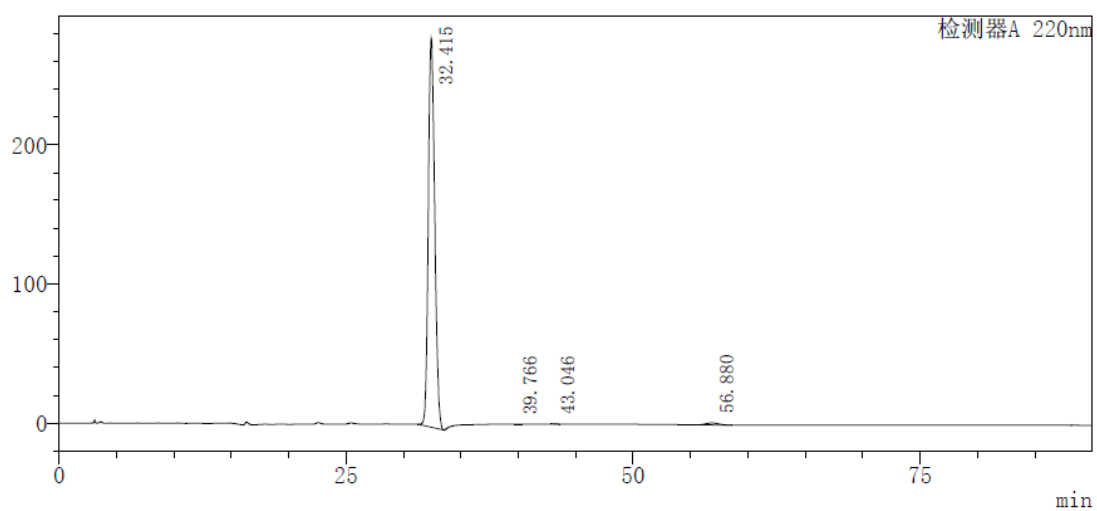

|        | Retention Time(min) | Relative Area (%) | 99.5% ee |
|--------|---------------------|-------------------|----------|
| Peak 1 | 32.415              | 98.999            |          |
| Peak 2 | 39.766              | 0.002             |          |
| Peak 3 | 43.046              | 0.004             |          |
| Peak 4 | 56.880              | 0.995             |          |

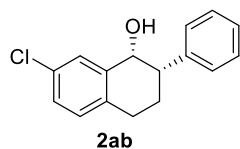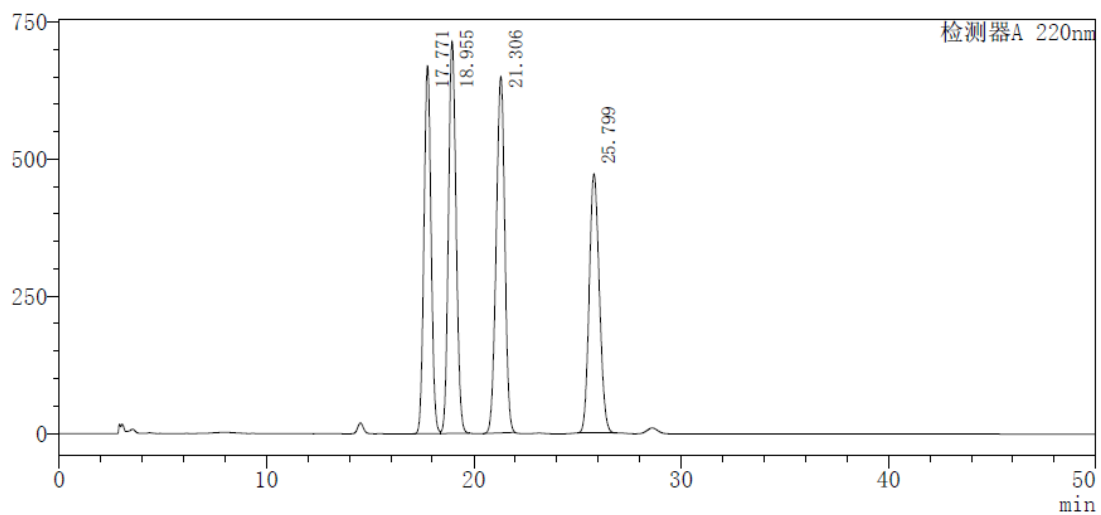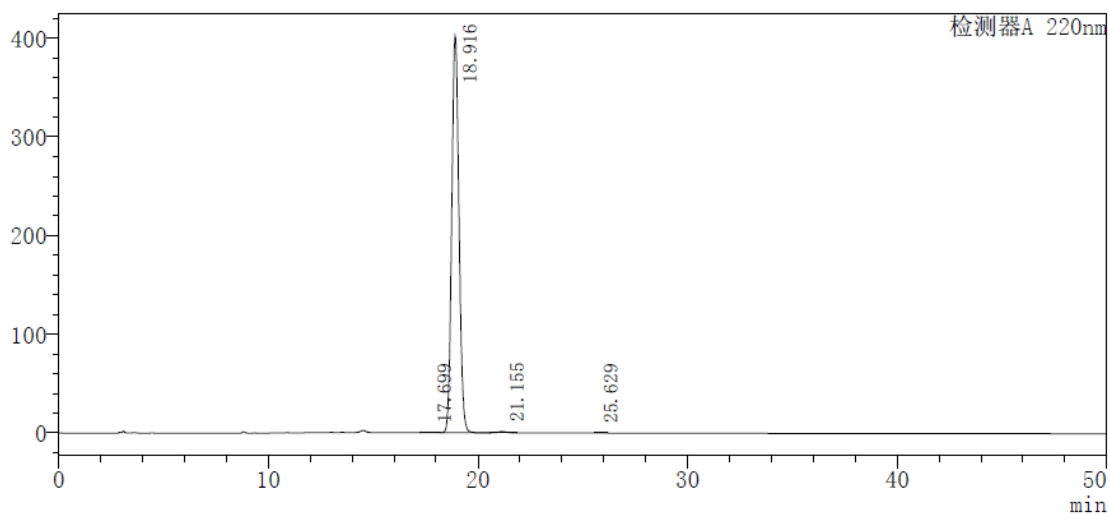

|        | Retention Time(min) | Relative Area (%) | 99.3% ee |
|--------|---------------------|-------------------|----------|
| Peak 1 | 17.699              | 0.012             |          |
| Peak 2 | 18.916              | 99.654            |          |
| Peak 3 | 21.155              | 0.331             |          |
| Peak 4 | 25.629              | 0.003             |          |

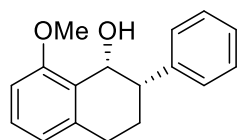

**2ac**

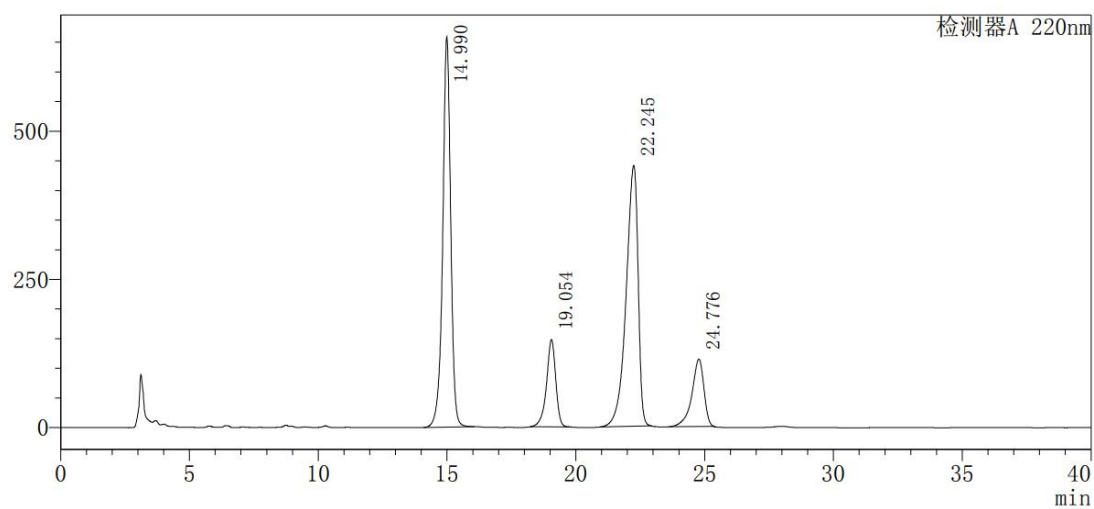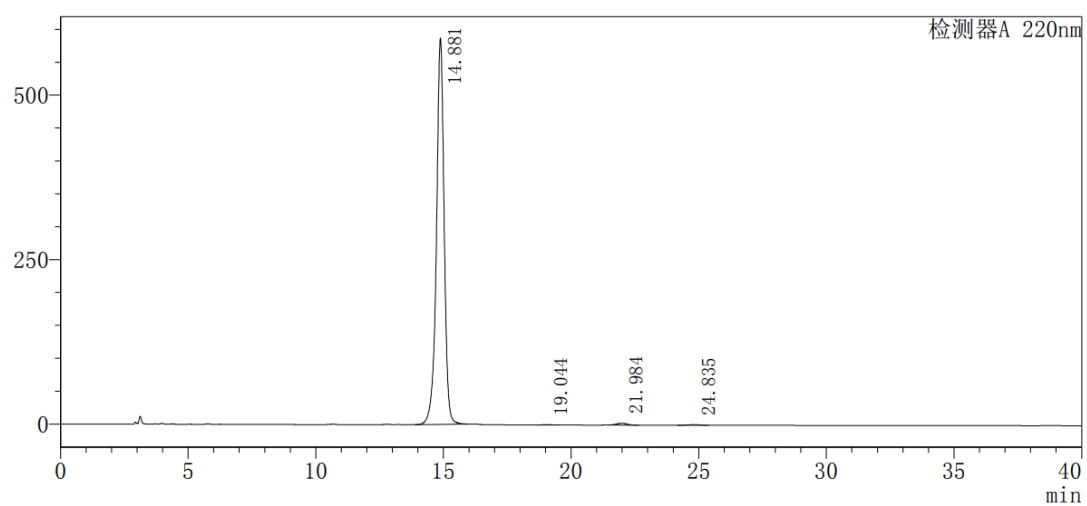

|        | Retention Time(min) | Relative Area (%) | 99% ee |
|--------|---------------------|-------------------|--------|
| Peak 1 | 14.881              | 99.003            |        |
| Peak 2 | 19.044              | 0.108             |        |
| Peak 3 | 21.984              | 0.663             |        |
| Peak 4 | 24.835              | 0.225             |        |



**2ad**

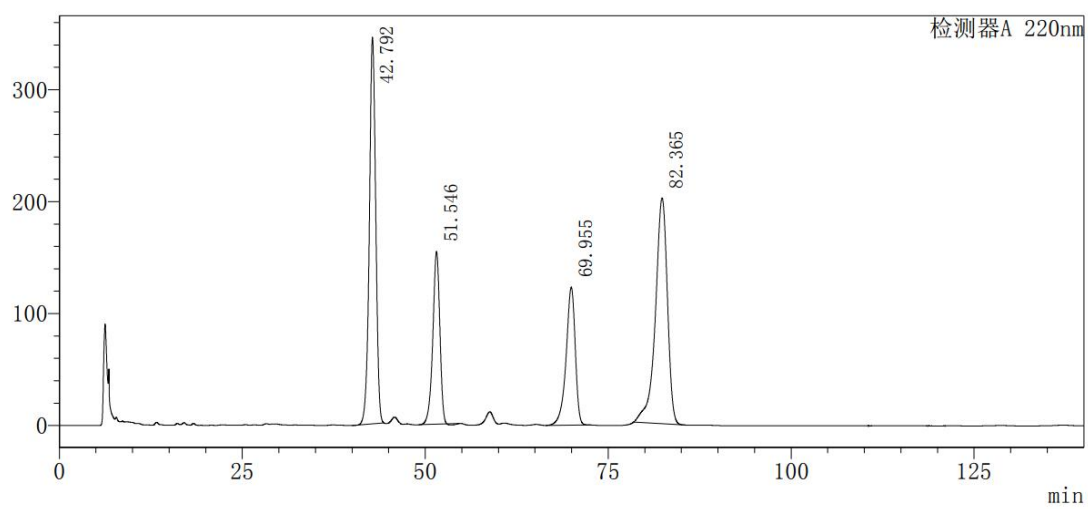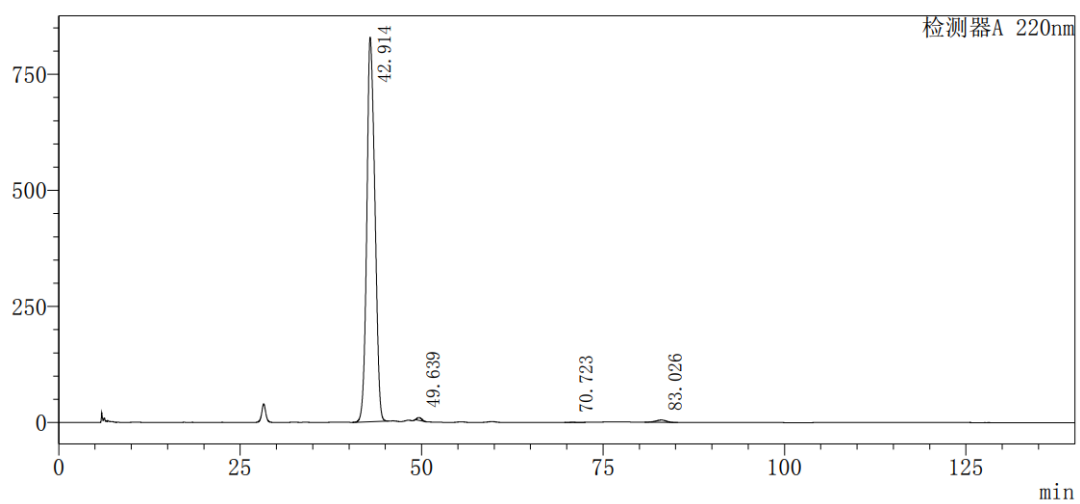

|        | Retention Time(min) | Relative Area (%) | 98% ee |
|--------|---------------------|-------------------|--------|
| Peak 1 | 42.914              | 98.803            |        |
| Peak 2 | 49.639              | 0.430             |        |
| Peak 3 | 70.723              | 0.013             |        |
| Peak 4 | 83.026              | 0.754             |        |

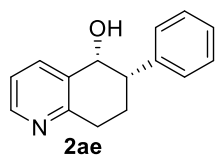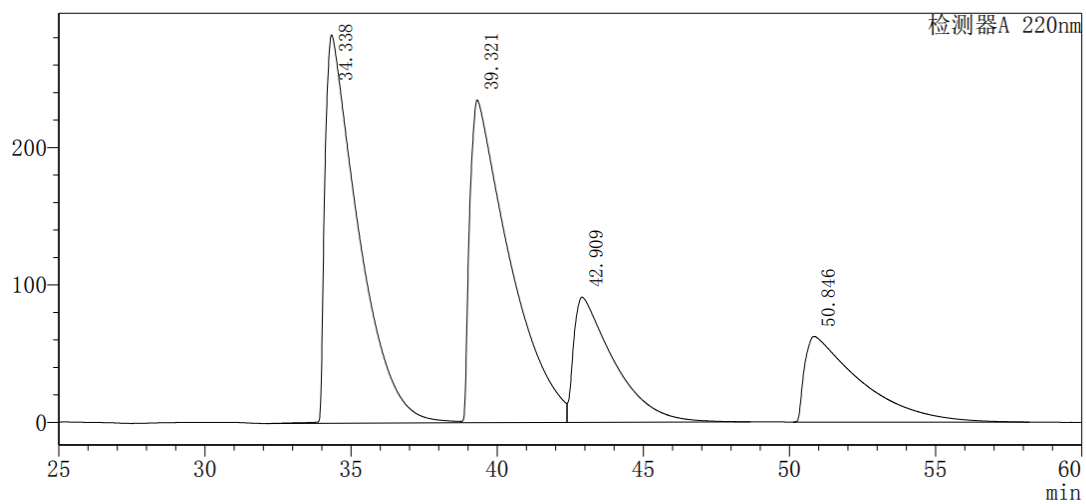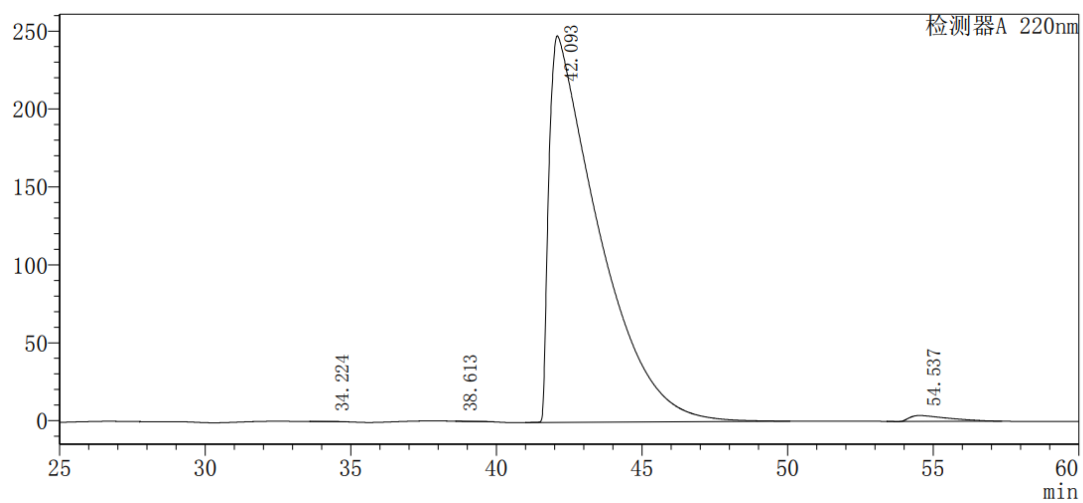

|        | Retention Time(min) | Relative Area (%) | 98% ee |
|--------|---------------------|-------------------|--------|
| Peak 1 | 34.224              | 0.013             |        |
| Peak 2 | 38.613              | 0.015             |        |
| Peak 3 | 42.093              | 98.828            |        |
| Peak 4 | 54.537              | 1.144             |        |

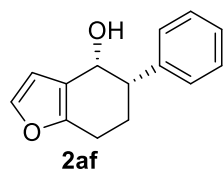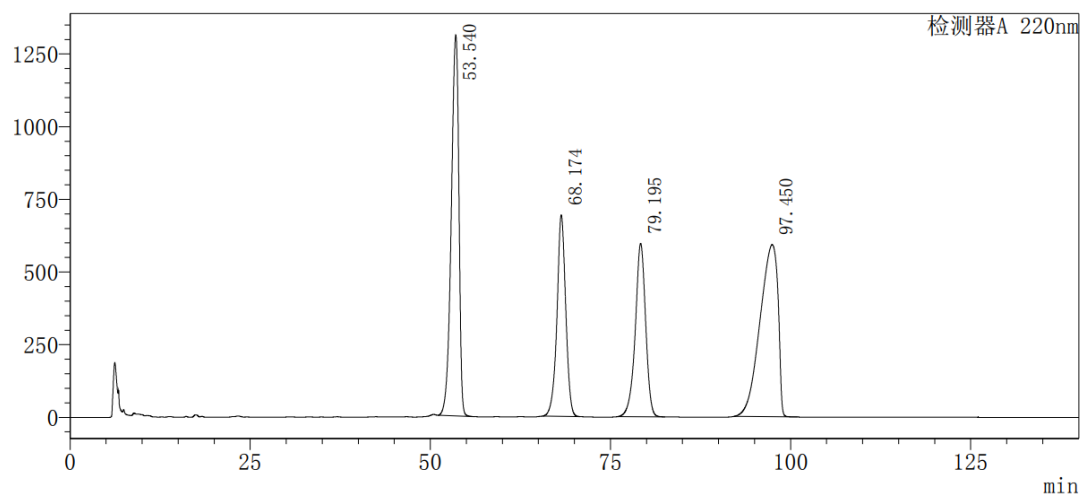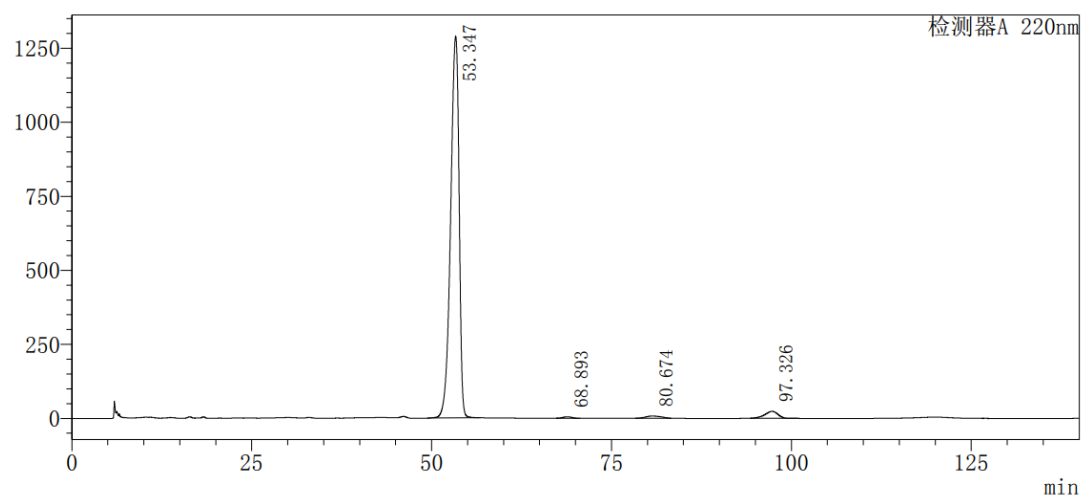

|        | Retention Time(min) | Relative Area (%) | 95% ee |
|--------|---------------------|-------------------|--------|
| Peak 1 | 53.347              | 95.887            |        |
| Peak 2 | 68.893              | 0.398             |        |
| Peak 3 | 80.674              | 1.011             |        |
| Peak 4 | 97.326              | 2.705             |        |

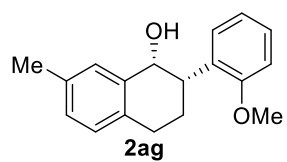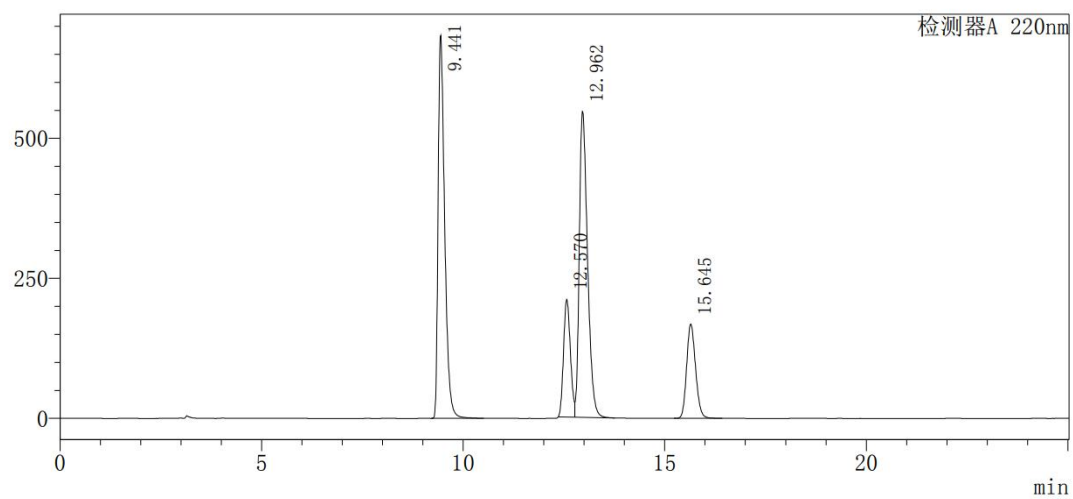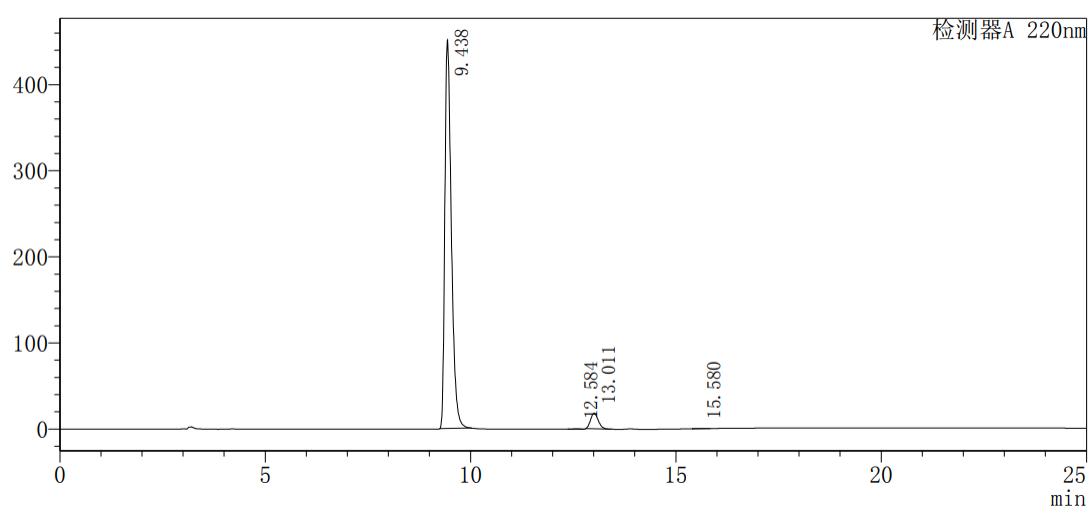

|        | Retention Time(min) | Relative Area (%) | 91% ee |
|--------|---------------------|-------------------|--------|
| Peak 1 | 9.438               | 95.310            |        |
| Peak 2 | 12.584              | 0.094             |        |
| Peak 3 | 13.011              | 4.537             |        |
| Peak 4 | 15.580              | 0.060             |        |



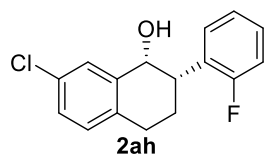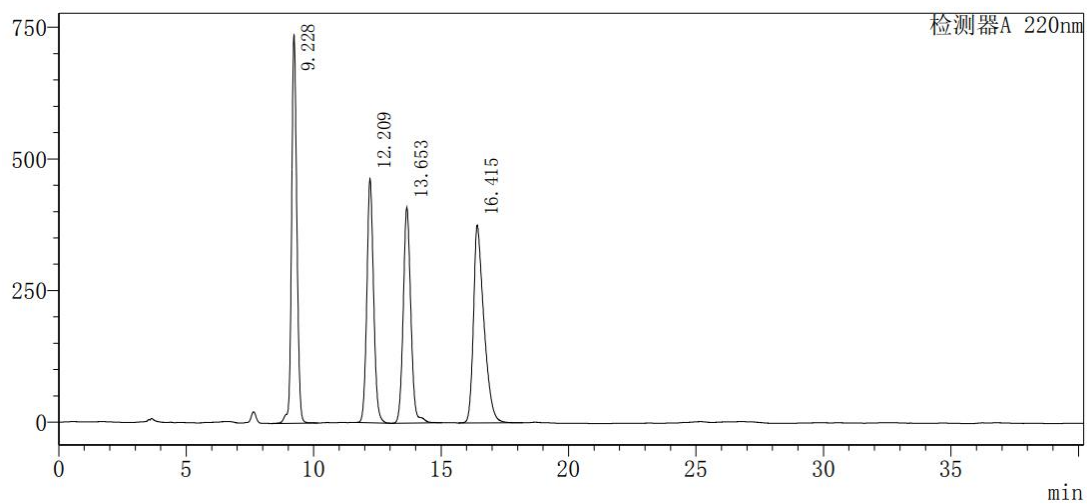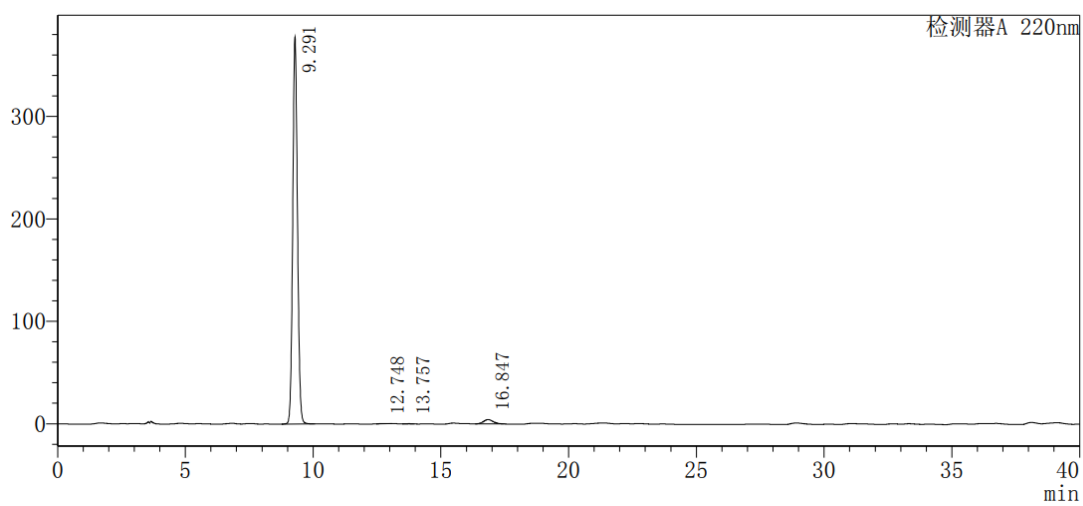

|        | Retention Time(min) | Relative Area (%) | 96% ee |
|--------|---------------------|-------------------|--------|
| Peak 1 | 9.291               | 97.642            |        |
| Peak 2 | 12.748              | 0.098             |        |
| Peak 3 | 13.757              | 0.055             |        |
| Peak 4 | 16.847              | 2.205             |        |

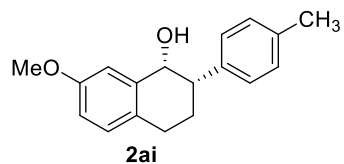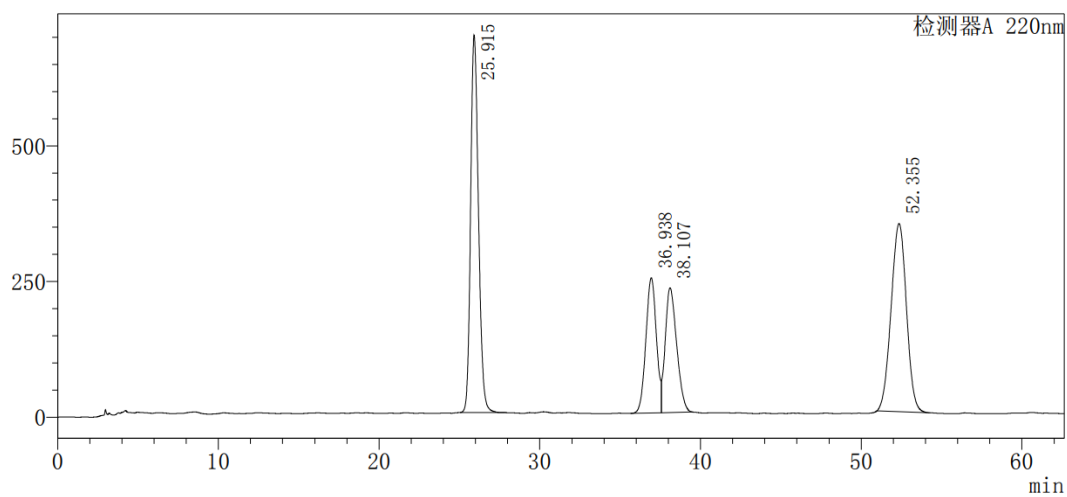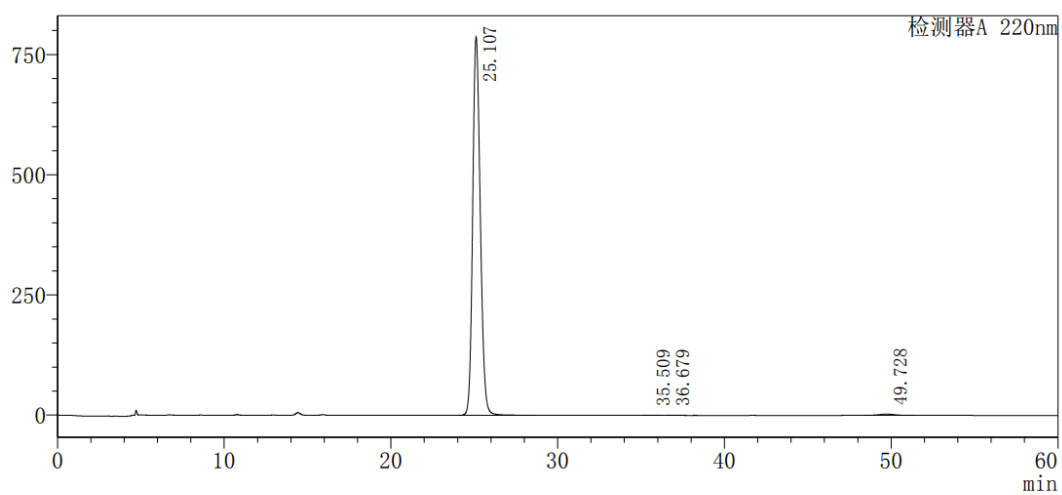

|        | Retention Time(min) | Relative Area (%) | 99% ee |
|--------|---------------------|-------------------|--------|
| Peak 1 | 25.107              | 99.340            |        |
| Peak 2 | 35.509              | 0.021             |        |
| Peak 3 | 36.679              | 0.001             |        |
| Peak 4 | 49.728              | 0.639             |        |

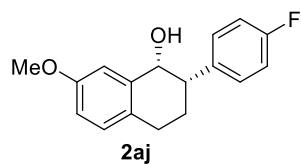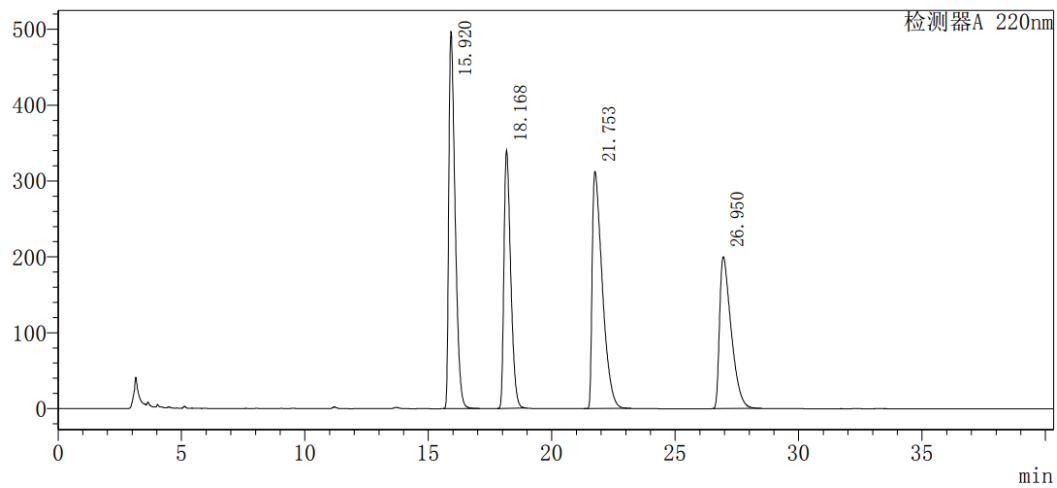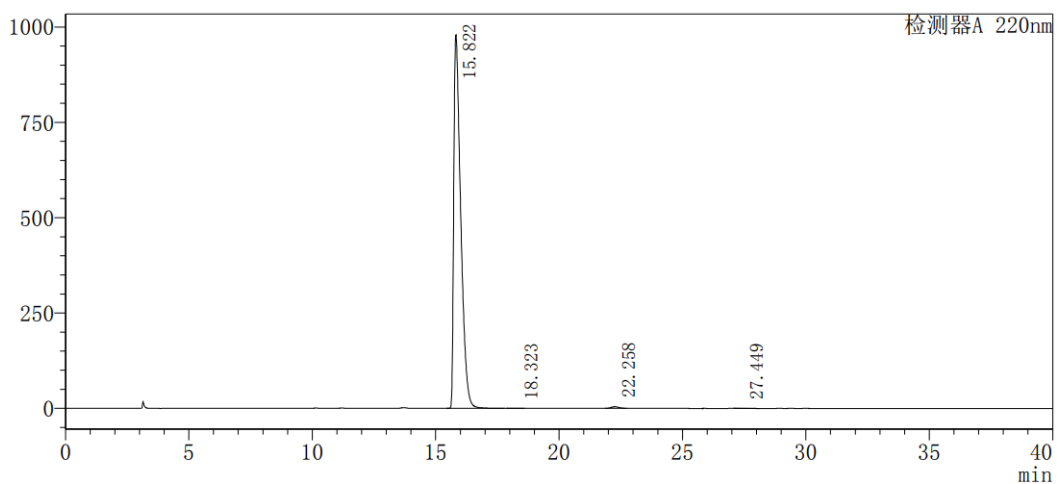

|               | Retention Time(min) | Relative Area (%) | <b>99.1% ee</b> |
|---------------|---------------------|-------------------|-----------------|
| <b>Peak 1</b> | 15.822              | 99.496            |                 |
| <b>Peak 2</b> | 18.323              | 0.027             |                 |
| <b>Peak 3</b> | 22.258              | 0.457             |                 |
| <b>Peak 4</b> | 27.449              | 0.020             |                 |

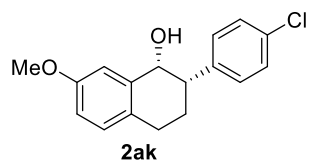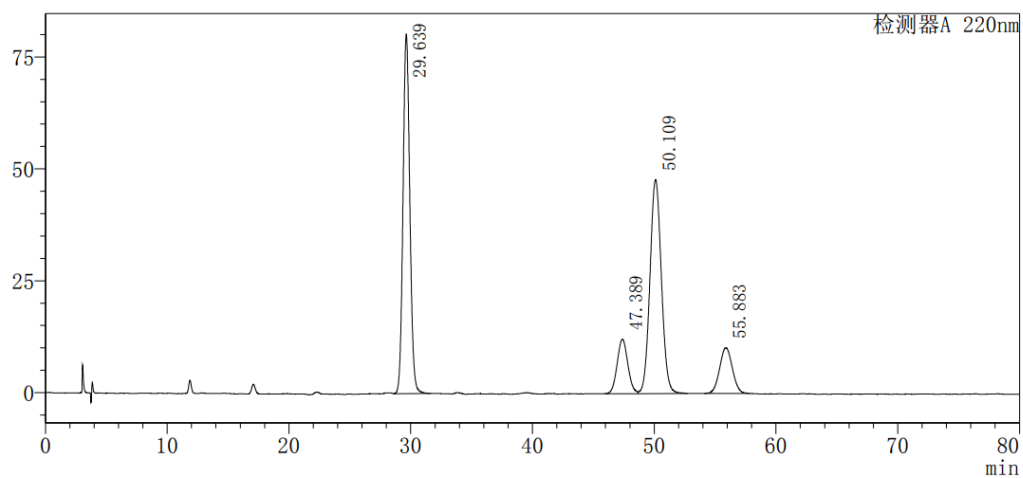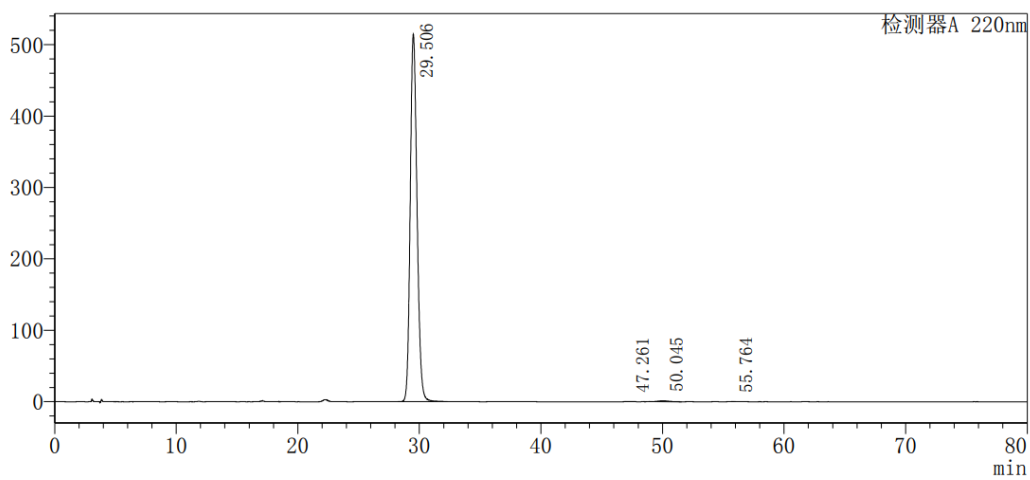

|        | Retention Time(min) | Relative Area (%) | 99.2% ee |
|--------|---------------------|-------------------|----------|
| Peak 1 | 29.506              | 99.575            |          |
| Peak 2 | 47.261              | 0.003             |          |
| Peak 3 | 50.045              | 0.421             |          |
| Peak 4 | 55.764              | 0.001             |          |

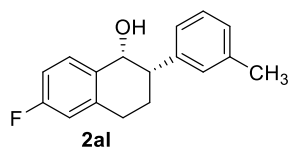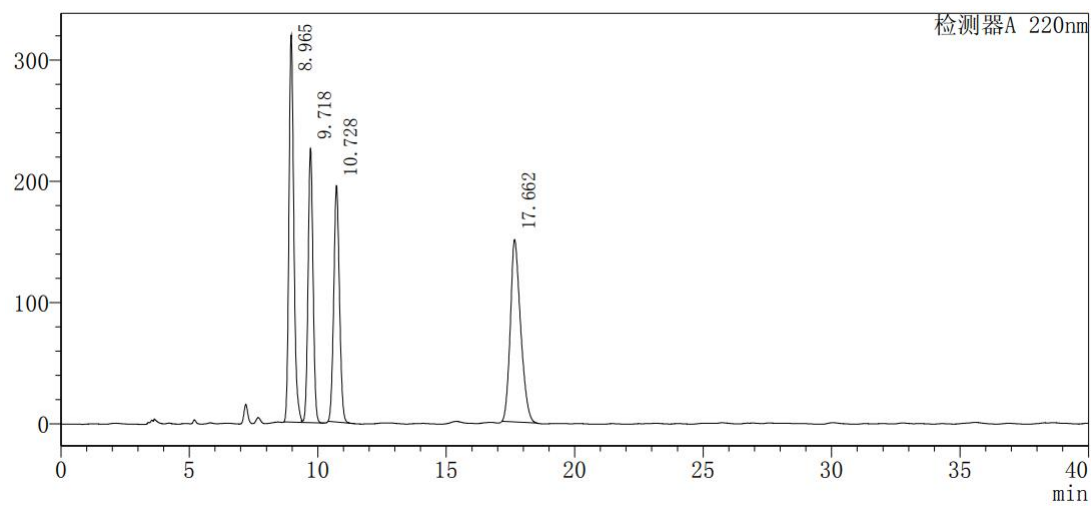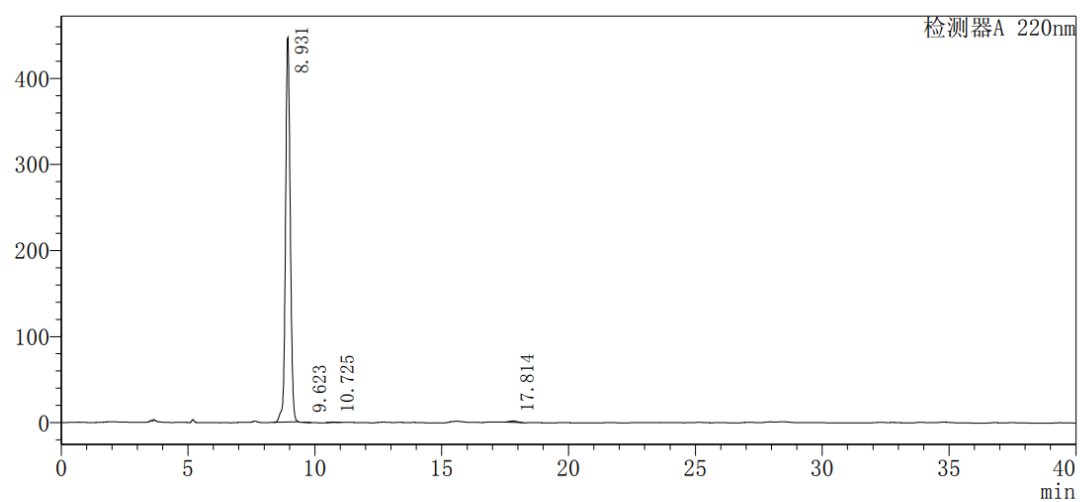

|        | Retention Time(min) | Relative Area (%) | 99% ee |
|--------|---------------------|-------------------|--------|
| Peak 1 | 8.931               | 99.218            |        |
| Peak 2 | 9.623               | 0.031             |        |
| Peak 3 | 10.725              | 0.148             |        |
| Peak 4 | 17.814              | 0.602             |        |

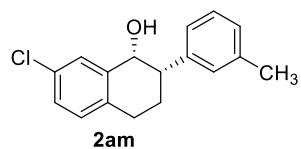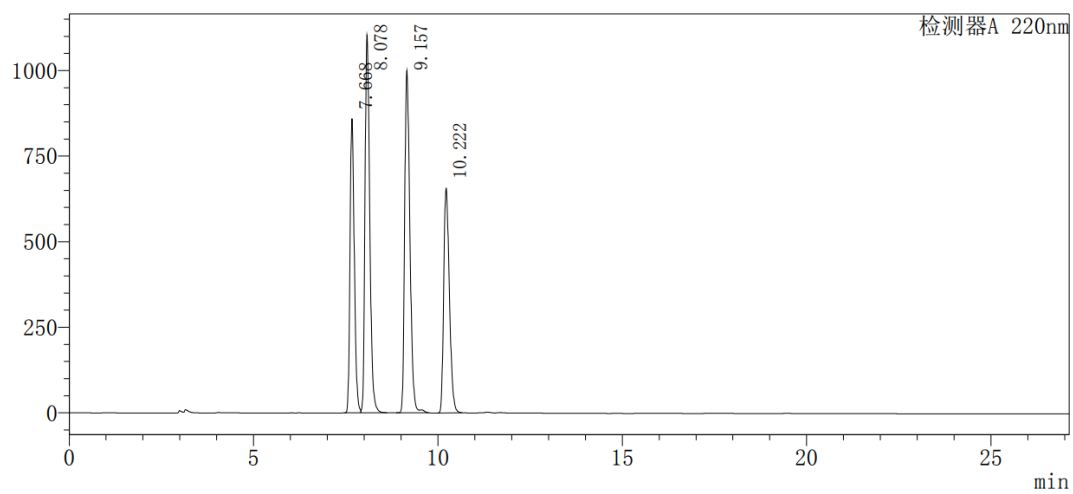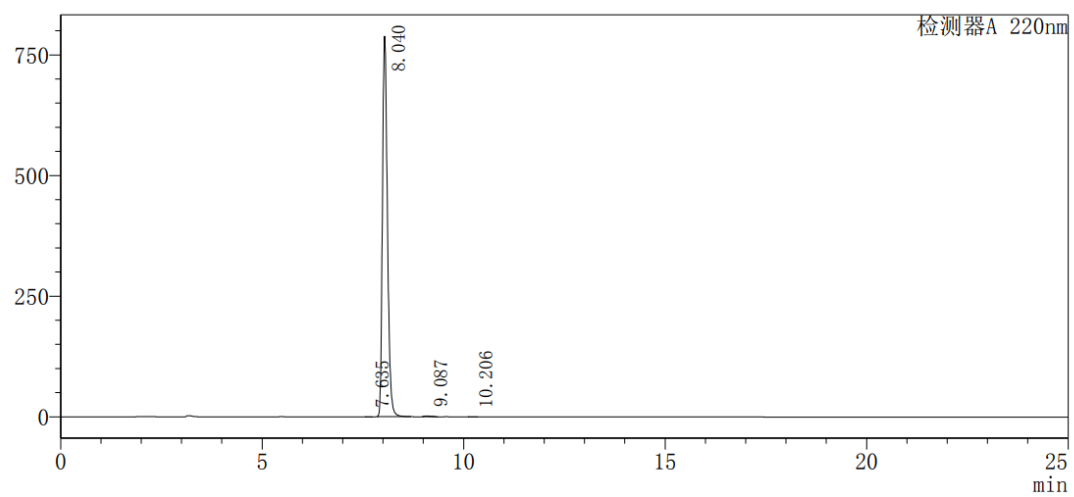

|               | Retention Time(min) | Relative Area (%) | <b>99.4% ee</b> |
|---------------|---------------------|-------------------|-----------------|
| <b>Peak 1</b> | 7.635               | 0.004             |                 |
| <b>Peak 2</b> | 8.040               | 99.692            |                 |
| <b>Peak 3</b> | 9.087               | 0.296             |                 |
| <b>Peak 4</b> | 10.206              | 0.009             |                 |

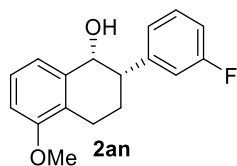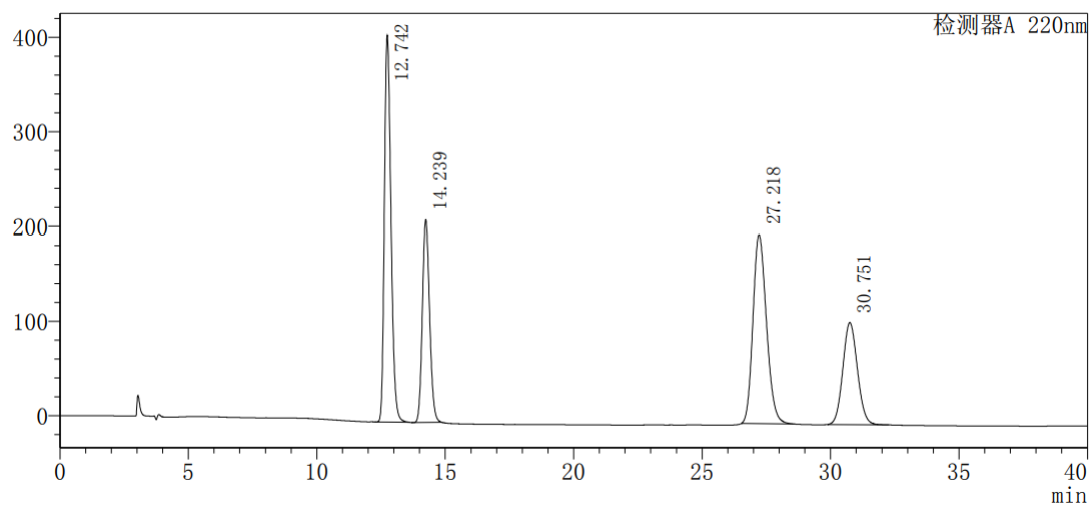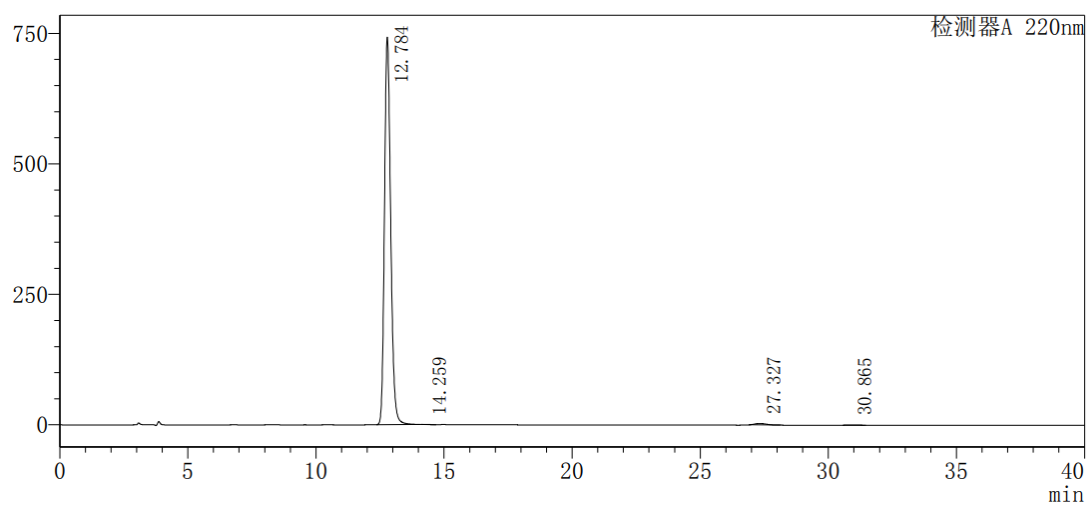

|        | Retention Time(min) | Relative Area (%) | 99% ee |
|--------|---------------------|-------------------|--------|
| Peak 1 | 12.784              | 99.264            |        |
| Peak 2 | 14.259              | 0.026             |        |
| Peak 3 | 27.327              | 0.668             |        |
| Peak 4 | 30.865              | 0.042             |        |

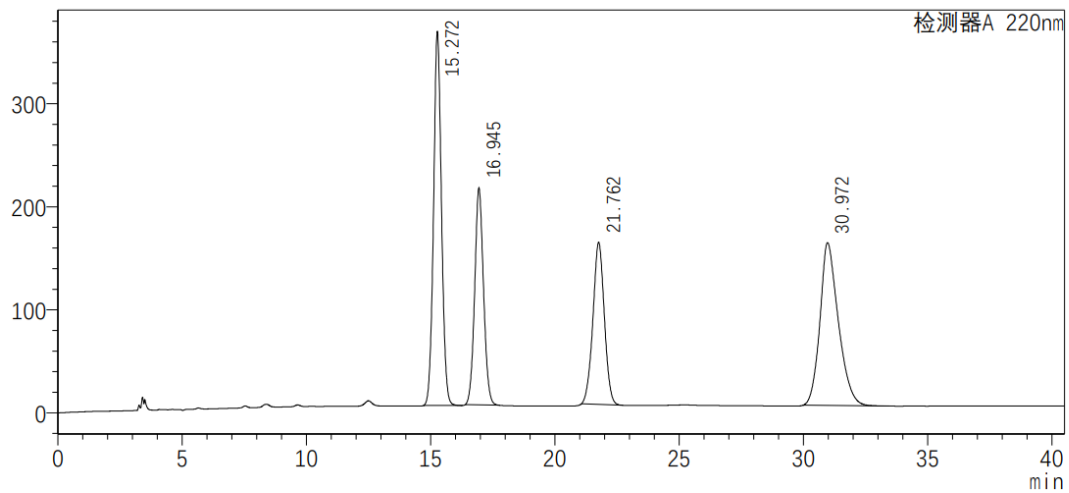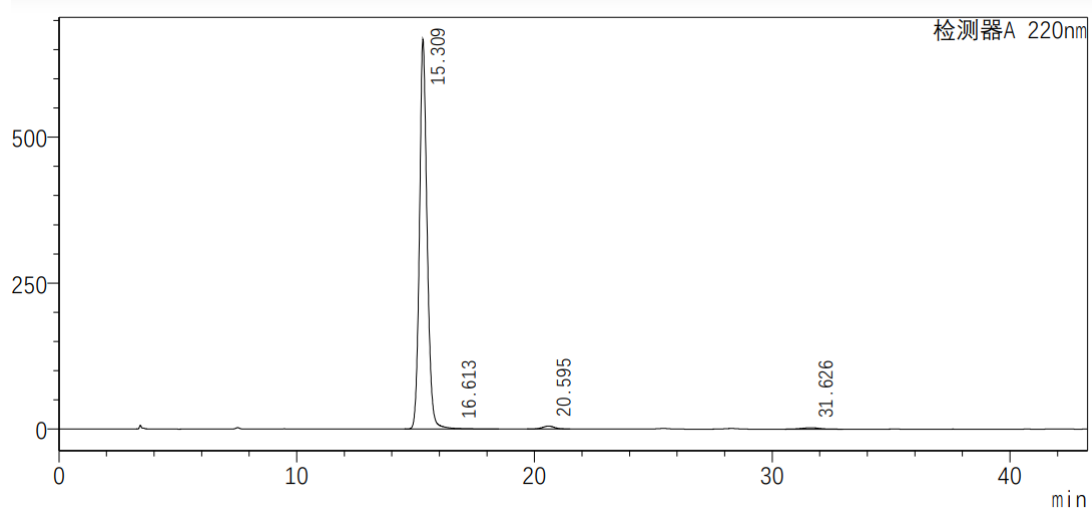

|        | Retention Time(min) | Relative Area (%) | 98% ee |
|--------|---------------------|-------------------|--------|
| Peak 1 | 15.309              | 97.687            |        |
| Peak 2 | 16.613              | 0.288             |        |
| Peak 3 | 20.595              | 1.210             |        |
| Peak 4 | 31.626              | 0.815             |        |



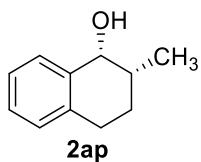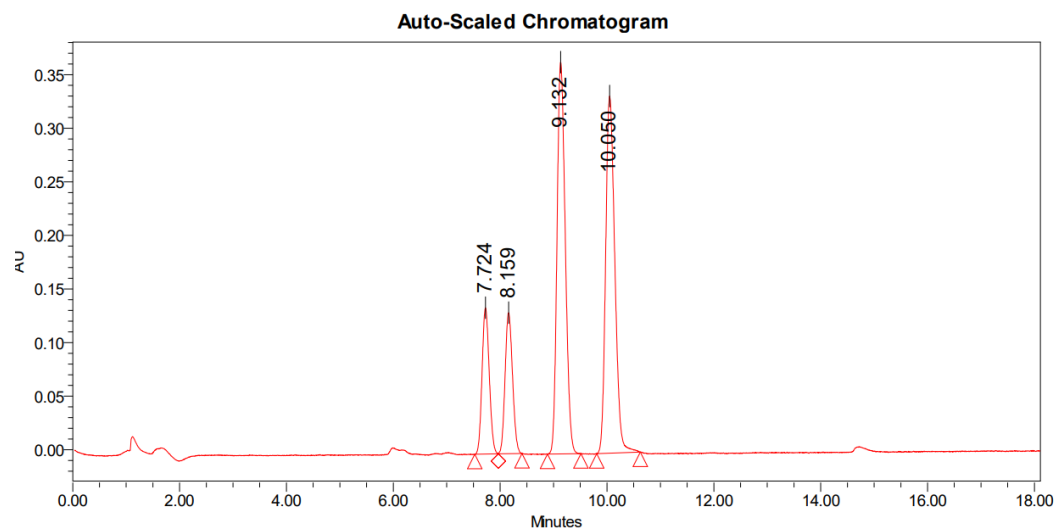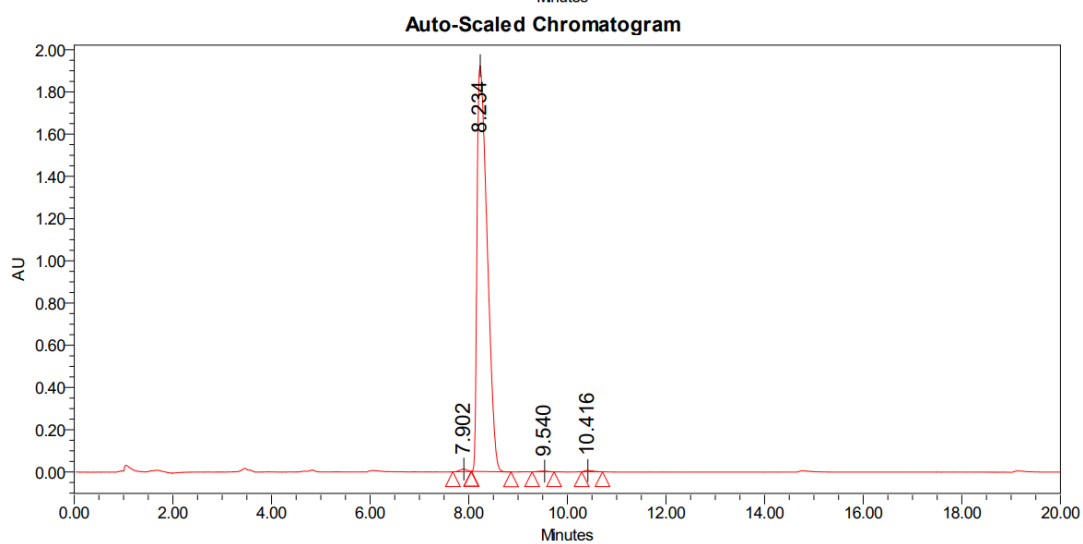

|               | Retention Time(min) | Relative Area (%) | <b>99.1% ee</b> |
|---------------|---------------------|-------------------|-----------------|
| <b>Peak 1</b> | 7.902               | 0.442             |                 |
| <b>Peak 2</b> | 8.234               | 99.089            |                 |
| <b>Peak 3</b> | 9.540               | 0.173             |                 |
| <b>Peak 4</b> | 10.416              | 0.296             |                 |

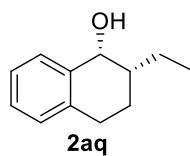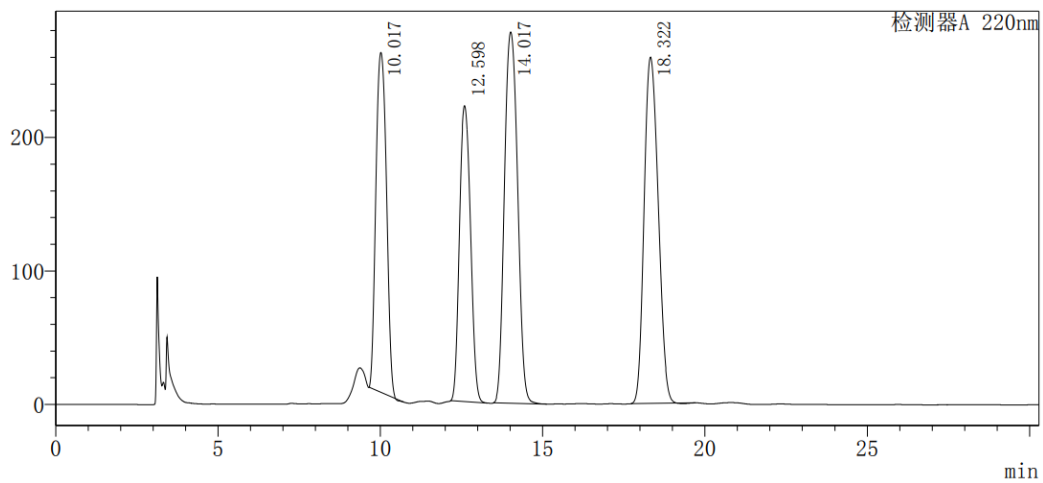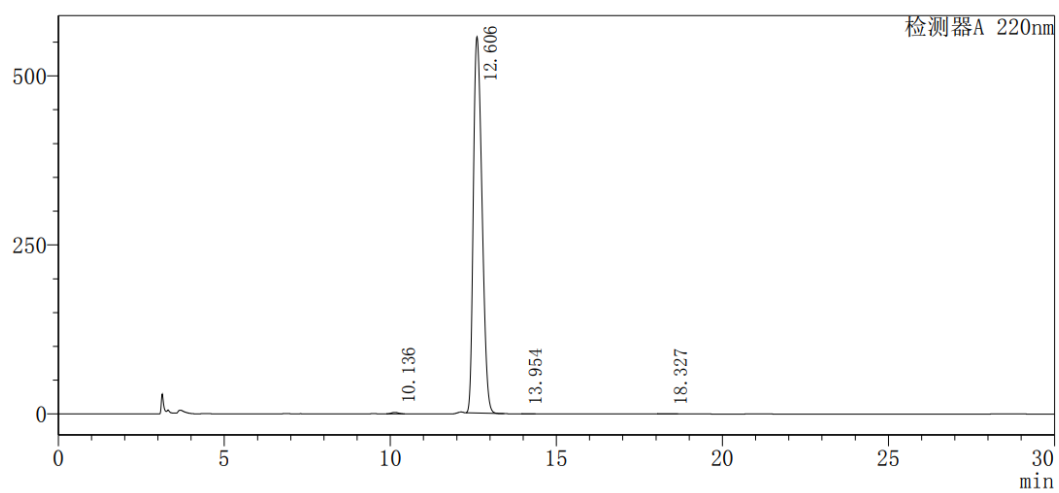

|        | Retention Time(min) | Relative Area (%) | 99.4% ee |
|--------|---------------------|-------------------|----------|
| Peak 1 | 10.136              | 0.304             |          |
| Peak 2 | 12.606              | 99.674            |          |
| Peak 3 | 13.954              | 0.003             |          |
| Peak 4 | 18.327              | 0.018             |          |

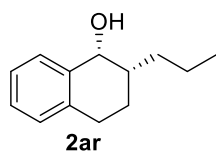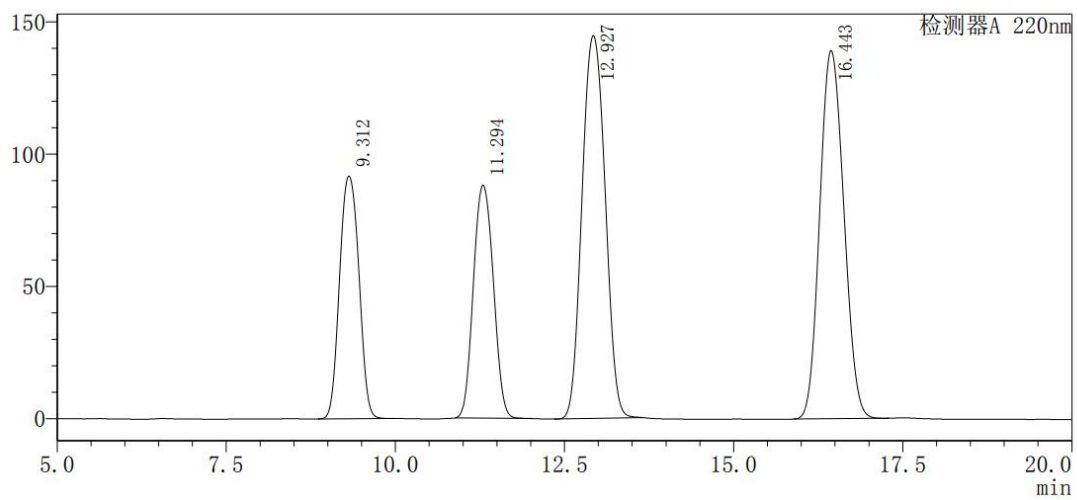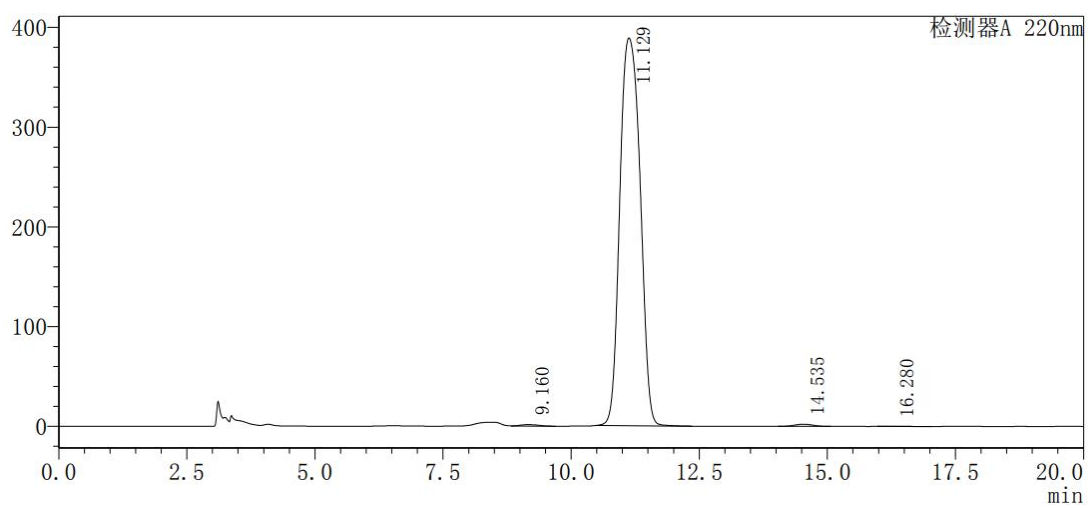

|               | Retention Time(min) | Relative Area (%) | <b>99.4% ee</b> |
|---------------|---------------------|-------------------|-----------------|
| <b>Peak 1</b> | 9.160               | 0.301             |                 |
| <b>Peak 2</b> | 11.129              | 99.168            |                 |
| <b>Peak 3</b> | 14.535              | 0.495             |                 |
| <b>Peak 4</b> | 16.280              | 0.036             |                 |

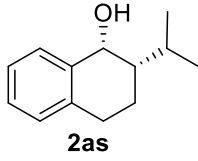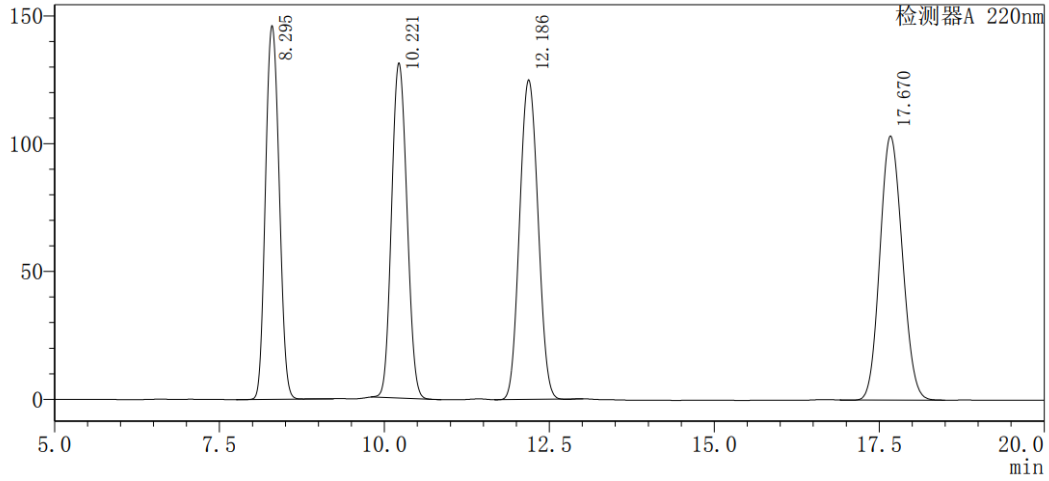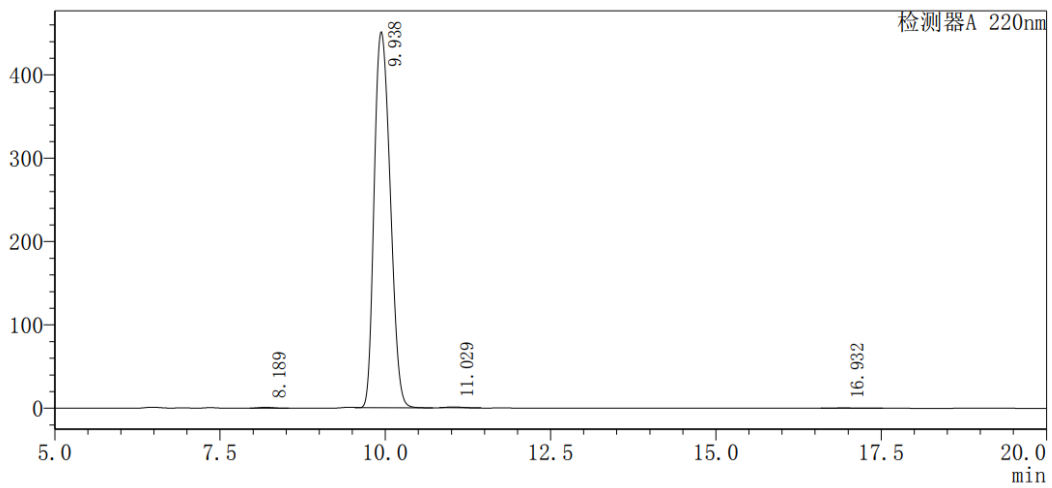

|               | Retention Time(min) | Relative Area (%) | <b>99.6% ee</b> |
|---------------|---------------------|-------------------|-----------------|
| <b>Peak 1</b> | 8.189               | 0.186             |                 |
| <b>Peak 2</b> | 9.938               | 99.490            |                 |
| <b>Peak 3</b> | 11.029              | 0.239             |                 |
| <b>Peak 4</b> | 16.932              | 0.085             |                 |

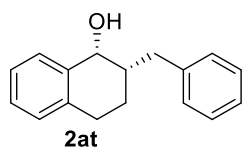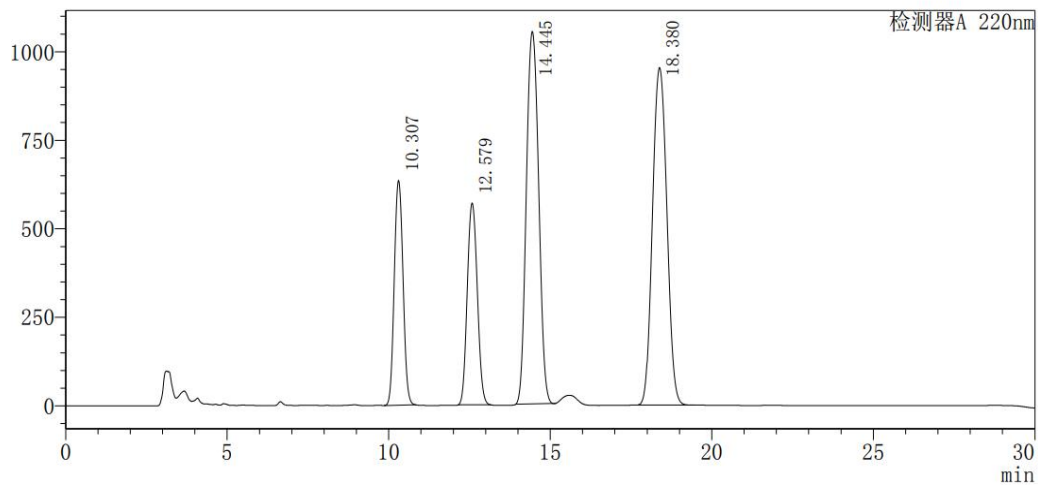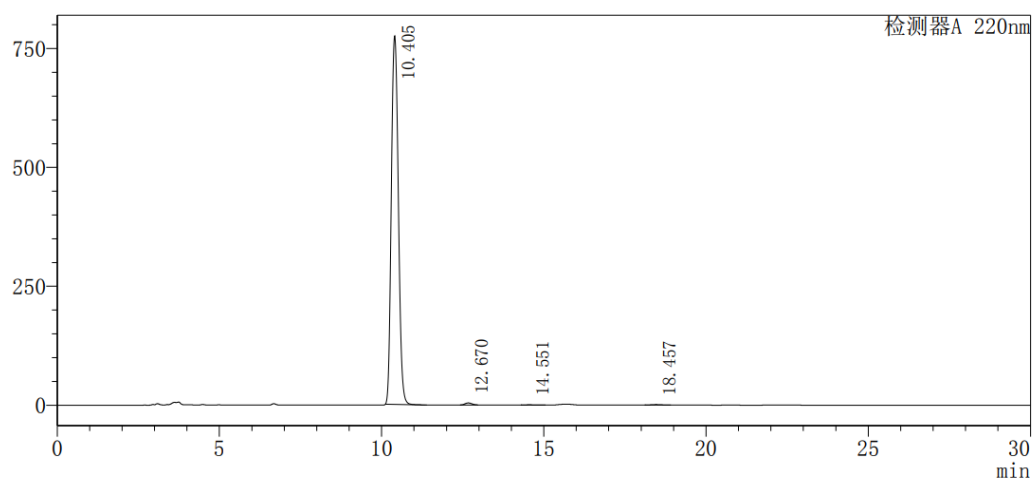

|               | <b>Retention Time(min)</b> | <b>Relative Area (%)</b> | <b>99% ee</b> |
|---------------|----------------------------|--------------------------|---------------|
| <b>Peak 1</b> | 10.405                     | 99.193                   |               |
| <b>Peak 2</b> | 12.670                     | 0.522                    |               |
| <b>Peak 3</b> | 14.551                     | 0.084                    |               |
| <b>Peak 4</b> | 18.457                     | 0.200                    |               |

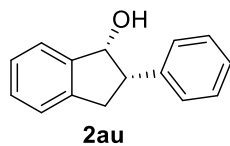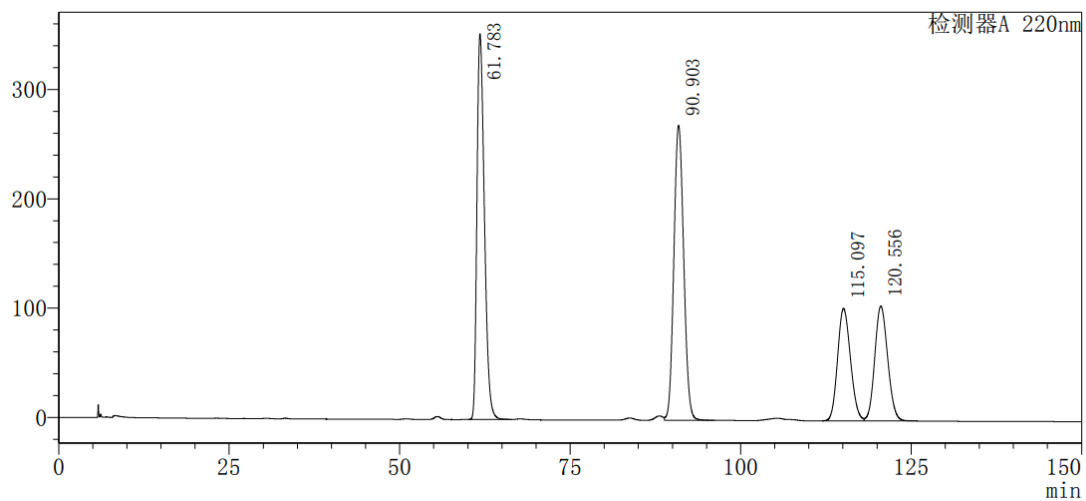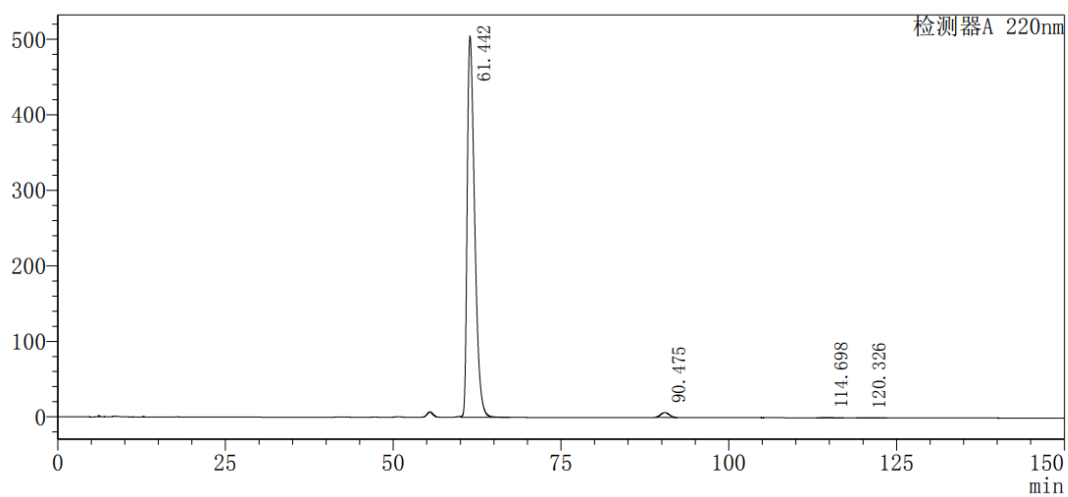

|        | Retention Time(min) | Relative Area (%) | 97% ee |
|--------|---------------------|-------------------|--------|
| Peak 1 | 61.442              | 98.538            |        |
| Peak 2 | 90.475              | 1.372             |        |
| Peak 3 | 114.698             | 0.054             |        |
| Peak 4 | 120.326             | 0.036             |        |

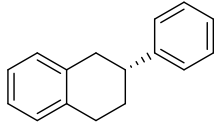

**3**

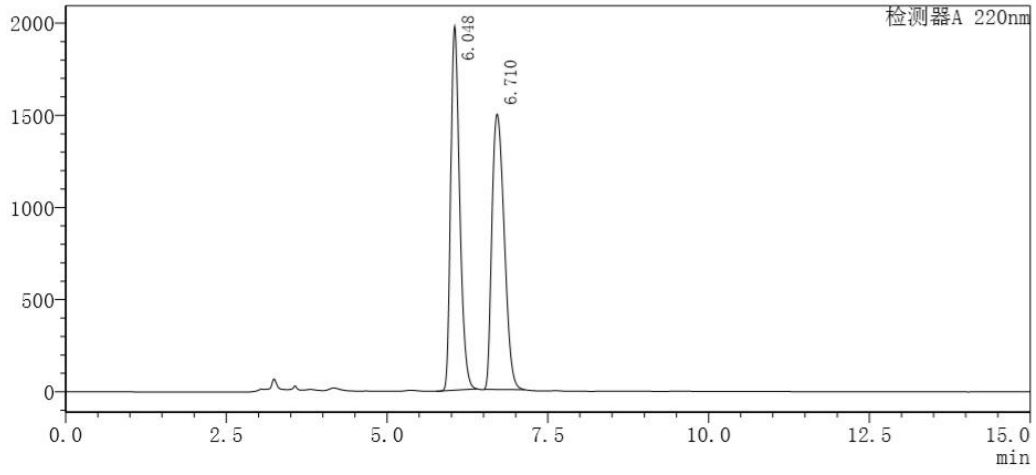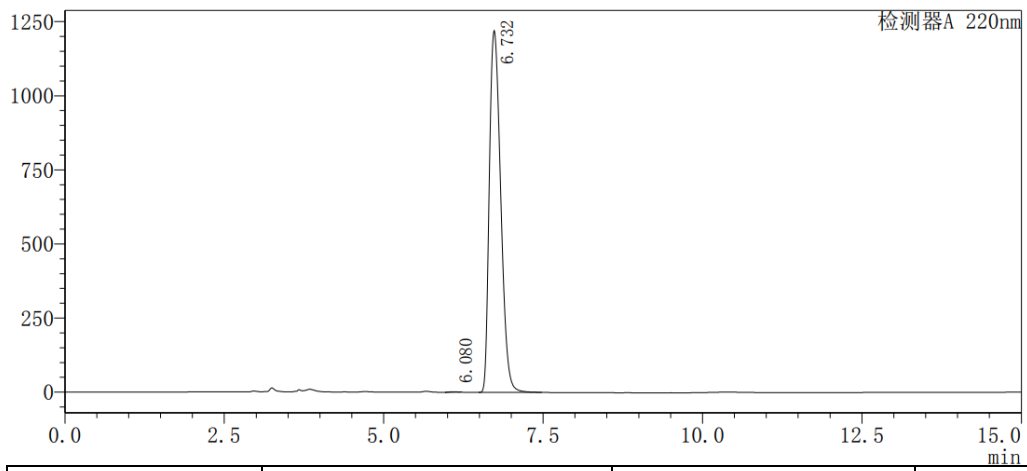

|        | Retention Time(min) | Relative Area (%) | 99.8% ee |
|--------|---------------------|-------------------|----------|
| Peak 1 | 6.080               | 0.083             |          |
| Peak 2 | 6.732               | 99.917            |          |

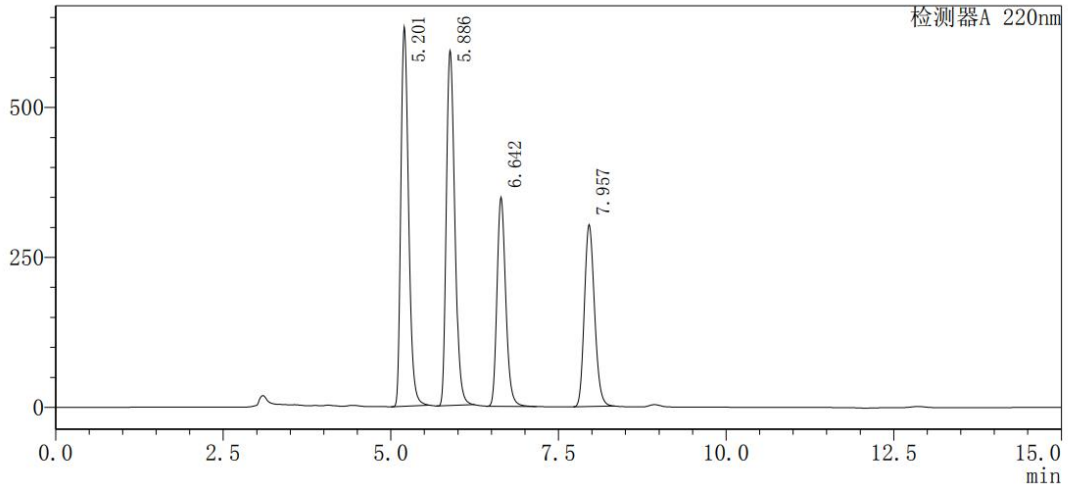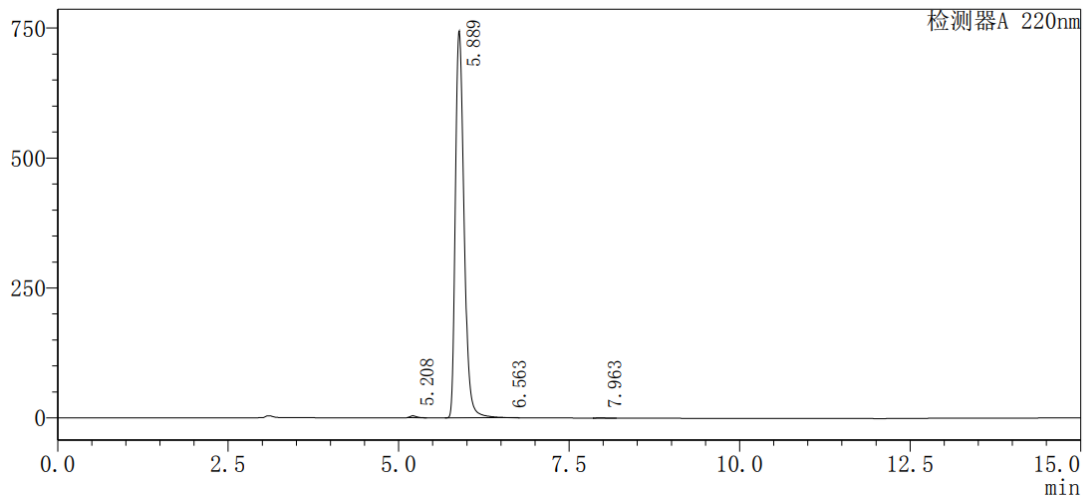

|               | Retention Time(min) | Relative Area (%) | <b>99.3% ee</b> |
|---------------|---------------------|-------------------|-----------------|
| <b>Peak 1</b> | 5.208               | 0.374             |                 |
| <b>Peak 2</b> | 5.889               | 99.588            |                 |
| <b>Peak 3</b> | 6.563               | 0.010             |                 |
| <b>Peak 4</b> | 7.963               | 0.028             |                 |



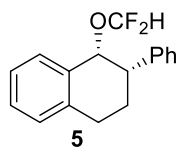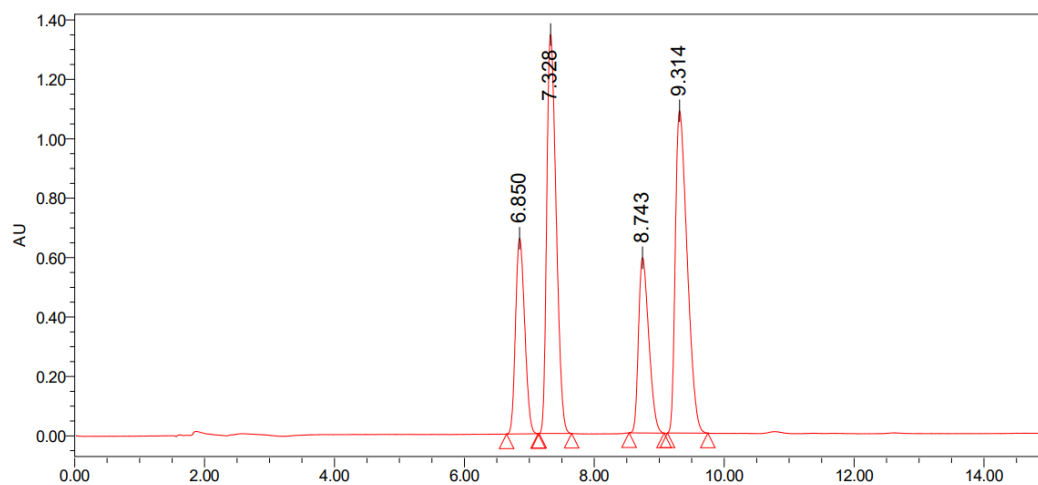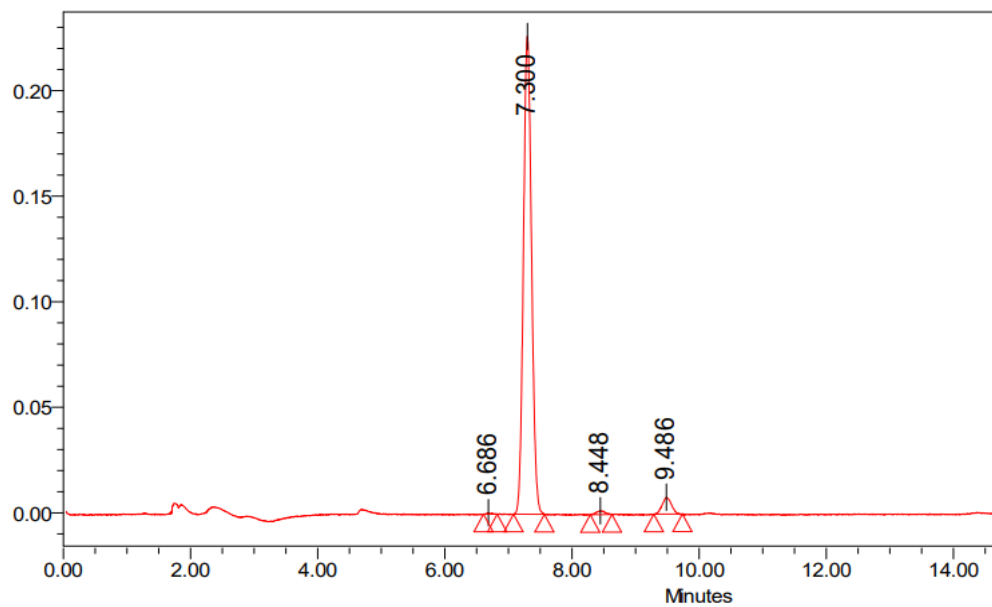

|        | Retention Time(min) | Relative Area (%) | 92% ee |
|--------|---------------------|-------------------|--------|
| Peak 1 | 6.686               | 0.100             |        |
| Peak 2 | 7.300               | 95.299            |        |
| Peak 3 | 8.448               | 0.803             |        |
| Peak 4 | 9.486               | 3.798             |        |

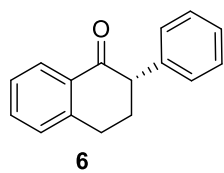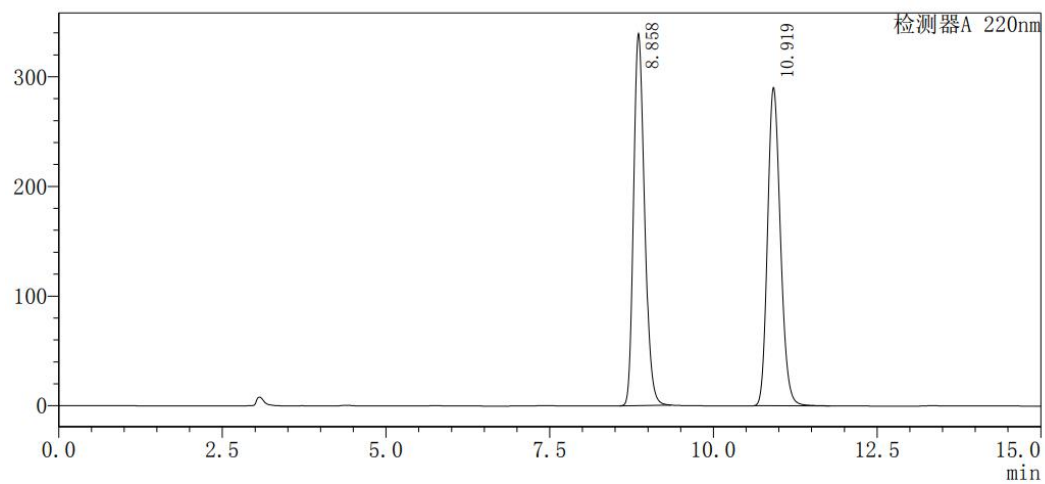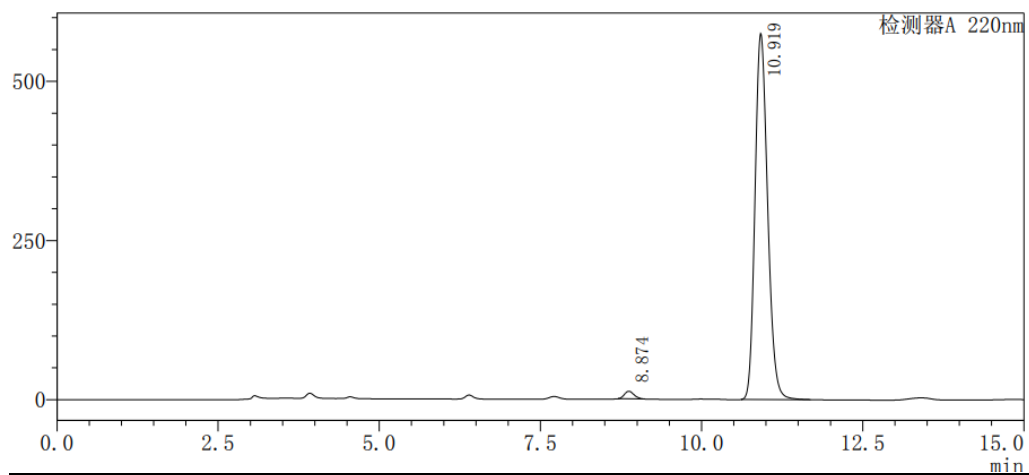

|        | Retention Time(min) | Relative Area (%) | 97% ee |
|--------|---------------------|-------------------|--------|
| Peak 1 | 8.874               | 1.539             |        |
| Peak 2 | 10.919              | 98.461            |        |

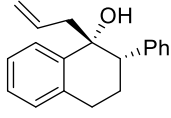

7

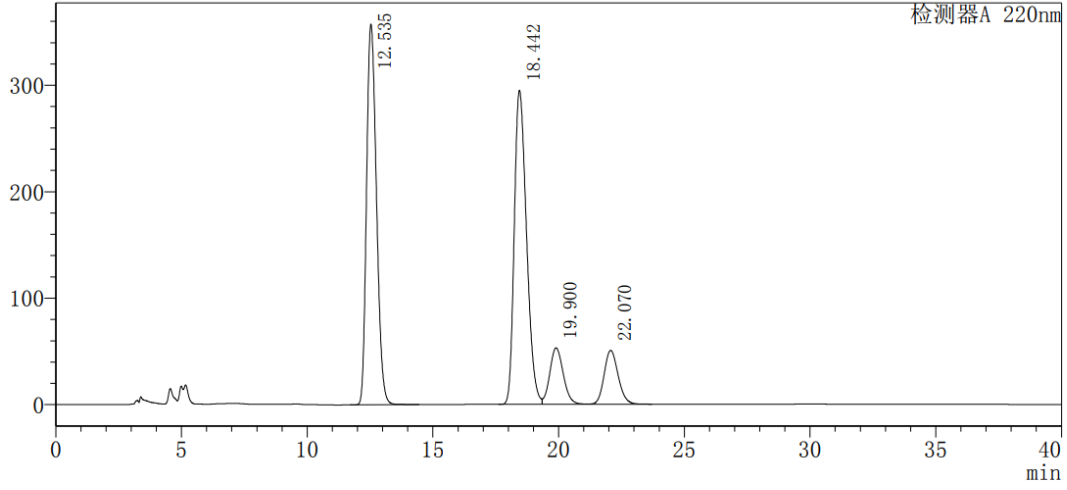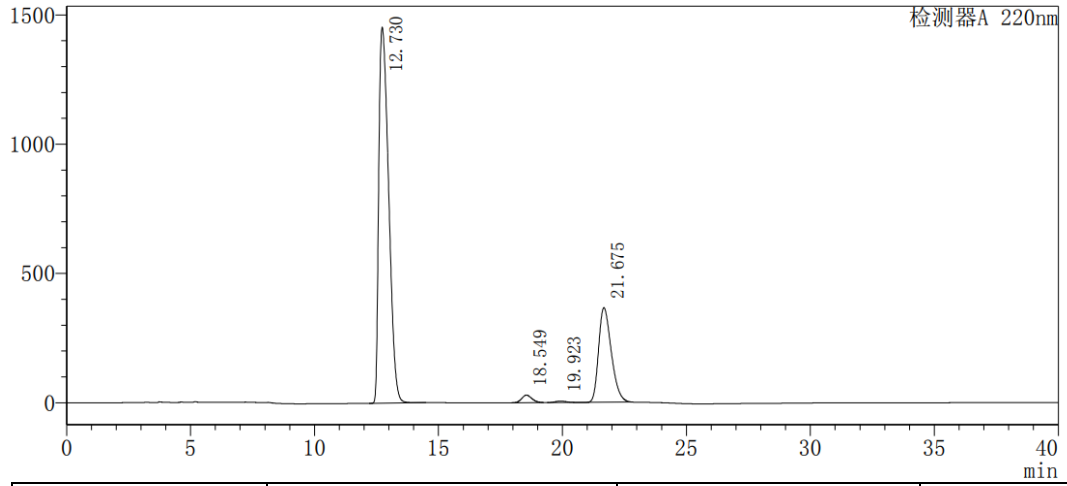

|               | Retention Time(min) | Relative Area (%) | <b>3.2:1dr</b><br><b>96%, 98%ee</b> |
|---------------|---------------------|-------------------|-------------------------------------|
| <b>Peak 1</b> | 12.730              | 74.295            |                                     |
| <b>Peak 2</b> | 18.549              | 1.505             |                                     |
| <b>Peak 3</b> | 19.923              | 0.259             |                                     |
| <b>Peak 4</b> | 21.675              | 23.942            |                                     |

## 9. References

1. K. Li, J. Chen, C. Yang, K. Zhang, C. Pan and B. Fan, *Org. Lett.*, 2020, **22**, 4261–4265.
2. O. V. Zatochnaya, S. Rodriguez, Y. Zhang, K. S. Lao, S. Teyrulnikov, G. Li, X. J. Wang, B. Qu, S. Biswas, H. P. R. Mangunuru, D. Rivalti, J. D. Sieber, J. N. Desrosiers, J. C. Leung, N. Grinberg, H. Lee, N. Haddad, N. K. Yee, J. J. Song, M. C. Kozlowski and C. H. Senanayake, *Chem. Sci.*, 2018, **9**, 4505–4510.
3. H. Y. Yin, X. L. Lin, S. W. Li and L. X. Shao, *Org. Biomol. Chem.*, 2015, **13**, 9012–9021.
4. J. Bonnamour, M. Piedrafita and C. Bolm, *Adv. Synth. Catal.*, 2010, **352**, 1577–1581.
5. K. Hiño, Y. Nagai, H. Uno, Y. Masuda, M. Oka and T. Karasawa, *J. Med. Chem.*, 1988, **31**, 107–117.
6. T. de A. Fernandes, J. L. O. Domingos, L. I. A. da Rocha, S. de Medeiros, C. Nájera and P. R. R. Costa, *Eur. J. Org. Chem.*, 2014, **2014**, 1314–1320.
7. L. G. Souza, J. L. de O. Domingos, T. de A. Fernandes, M. N. Renno, J. M. Sansano, C. Najera and P. R. R. Costa, *J. Fluor. Chem.*, 2019, **217**, 72–79.
8. M. S. Newman, *J. Org. Chem.*, 1944, **9**, 518–528.
9. W. Vaccaro, C. Amore, J. Berger, R. Burrier, J. Clader, H. Davis, M. Domalski, T. Fevig, B. Salisbury and R. Sher, *J. Med. Chem.*, 1996, **39**, 1704–1719.
10. H. Y. Yin, X. L. Lin, S. W. Li and L. X. Shao, *Org. Biomol. Chem.*, 2015, **13**, 9012–9021.
11. T. Touge, K. Sakaguchi, N. Tamaki, H. Nara, T. Yokozawa, K. Matsumura and Y. Kayaki, *J. Am. Chem. Soc.*, 2019, **141**, 16354–16361.
12. M. K. Barman, A. Jana and B. Maji, *Adv. Synth. Catal.*, 2018, **360**, 3233–3238.
13. E. Hasegawa, K. Nemoto, R. Nagumo, E. Tayama and H. Iwamoto, *J. Org. Chem.*, 2016, **81**, 2692–2703.
14. C. F. Malosh and J. M. Ready, *J. Am. Chem. Soc.*, 2004, **126**, 10240–10241.
15. J. Yuan, C. Liu, Y. Chen, Z. Zhang, D. Yan and W. Zhang, *Tetrahedron*, 2019, **75**, 269–277.
16. D. M. Musser and H. Adkins, *J. Am. Chem. Soc.*, 1938, **60**, 664–669.
17. H. Hiroshi, A. Mannosuke, I. Naoto, *Bull. Chem. Soc. Japan*, 1974, **47**, 1693–1686.
18. Y. Ma, J. Li, J. Ye, D. Liu and W. Zhang, *Chem. Commun.*, 2018, **54**, 13571–13574.
19. R. Kuwano and T. Shige, *J. Am. Chem. Soc.*, 2007, **129**, 3802–3803.
20. J. Li, Y. Zhu, Y. Lu, Y. Wang, Y. Liu, D. Liu and W. Zhang, *Org. Lett.*, 2019, **38**, 3970–3978.

21. M. Sekio, K. Akira and H. Kaoru, *Bull. Chem. Soc. Japan*, 1968, **41**, 2526–2528.
22. Q. Xie, C. Ni, R. Zhang, L. Li, J. Rong and J. Hu, *Angew. Chem., Int. Ed.*, 2017, **56**, 3206–3210.
